# Supplementary material for: Transcriptome Profiling to Understand the Effect of Citrus Rootstocks on the Growth of ‘Shatangju’ Mandarin
Source: PLoS One. 2017 Jan 12;12(1):e0169897. doi: 10.1371/journal.pone.0169897 (PMC5231354; doi:10.1371/journal.pone.0169897)
Supplement: S2 Table — (XLS) [file pone.0169897.s002.xls]

## Sheet: Red tangerine vs. ‘Shatangju’ 
All the differentially expressed unigenes and their FPKM values in Red tangerine vs. ‘Shatangju’ mandarin
Gene_name	AGI(Arabidopsis Genome Initiative)	Description	Locus	Red tangerine_FPKM	‘Shatangju’ mandarin_FPKM	Fold_change-Red tangerine/‘Shatangju’ mandarin	p-value	FDR
Ciclev10000001m.g	AT1G55860.2	ubiquitin-protein ligase 1	scaffold_5:35379209-35394765	22.013	6.10814	3.60388	0.00289002	0.0285872
Ciclev10000002m.g	AT1G58230.1	binding	scaffold_5:35462072-35488434	13.2796	4.43673	2.99311	0.038109	0.220872
Ciclev10000004m.g	AT1G58250.1	Golgi-body localisation protein domain ;RNA pol II promoter Fmp27 protein domain	scaffold_5:35420547-35440993	11.2222	2.60802	4.30296	0.0191152	0.130661
Ciclev10000005m.g	AT1G77300.1	histone methyltransferases(H3-K4 specific);histone methyltransferases(H3-K36 specific)	scaffold_5:37817189-37832291	9.37779	2.32068	4.04097	0.0530682	0.28528
Ciclev10000006m.g	AT5G24350.1		scaffold_5:13242991-13256142	6.30343	2.4782	2.54355	0.218039	0.723111
Ciclev10000007m.g	AT1G36160.1	acetyl-CoA carboxylase 1	scaffold_5:36660140-36674263	8.92296	2.88976	3.08779	0.0865481	0.401389
Ciclev10000008m.g	AT4G22970.1	homolog of separase	scaffold_5:12226123-12245736	5.71622	3.07045	1.86169	0.541376	1
Ciclev10000009m.g	AT1G21580.1	Zinc finger C-x8-C-x5-C-x3-H type family protein	scaffold_5:37855729-37864590	15.1541	5.07015	2.98889	0.0318705	0.193401
Ciclev10000010m.g	AT1G77460.1	Armadillo/beta-catenin-like repeat ; C2 calcium/lipid-binding domain (CaLB) protein	scaffold_5:37569451-37578288	4.02317	1.77511	2.26643	0.279817	0.833852
Ciclev10000011m.g	AT4G16310.1	LSD1-like 3	scaffold_5:41621905-41632132	6.82046	3.26882	2.08652	0.379008	0.958688
Ciclev10000013m.g	AT5G42950.1	GYF domain-containing protein	scaffold_5:40957570-40966096	16.8593	4.38547	3.84435	0.00942406	0.074492
Ciclev10000014m.g	AT3G04740.1	RNA polymerase II transcription mediators	scaffold_5:29424164-29437482	9.06521	3.75034	2.41717	0.112092	0.475539
Ciclev10000015m.g	AT5G58410.1	HEAT/U-box domain-containing protein	scaffold_5:12783975-12798505	9.94776	4.82567	2.06143	0.202242	0.700734
Ciclev10000018m.g	AT2G13680.1	callose synthase 5	scaffold_5:18122994-18137457	3.92151	2.28105	1.71917	0.721429	1
Ciclev10000021m.g	AT1G34260.1	FORMS APLOID AND BINUCLEATE CELLS 1A	scaffold_5:39593308-39602756	24.1194	16.8436	1.43196	0.21661	0.719728
Ciclev10000022m.g	AT5G27970.1	ARM repeat superfamily protein	scaffold_5:30707094-30725682	12.0854	4.34207	2.78333	0.0592231	0.308847
Ciclev10000023m.g	AT5G13530.1	protein kinases;ubiquitin-protein ligases	scaffold_5:21434576-21450040	16.0997	2.53501	6.35094	0.00124046	0.0141335
Ciclev10000024m.g	AT1G71220.1	UDP-glucose:glycoprotein glucosyltransferases;transferases, transferring hexosyl groups;transferases, transferring glycosyl groups	scaffold_5:8636099-8657848	40.5127	16.3187	2.48259	0.000937816	0.0111994
Ciclev10000026m.g	AT1G33410.2	SUPPRESSOR OF AUXIN RESISTANCE1	scaffold_5:64758-82168	17.9788	9.63615	1.86577	0.130341	0.524236
Ciclev10000027m.g	AT1G77800.1	PHD finger family protein	scaffold_5:36903339-36915125	27.0461	8.79318	3.0758	0.00143294	0.0159327
Ciclev10000028m.g	AT1G35660.1		scaffold_5:39404242-39410935	6.94269	2.02085	3.43553	0.218039	0.723111
Ciclev10000029m.g	AT3G14460.1	LRR and NB-ARC domains-containing disease resistance protein	scaffold_5:20095172-20099940	6.1661	1.77677	3.4704	0.102907	0.451001
Ciclev10000030m.g	AT1G58060.1	RNA helicase family protein	scaffold_5:6404462-6435349	13.2816	8.94098	1.48547	0.29988	0.856964
Ciclev10000033m.g	AT1G35530.2	DEAD/DEAH box RNA helicase family protein	scaffold_5:39311466-39320010	0.906521	0.253669	3.57364	1	1
Ciclev10000034m.g	AT1G76810.1	eukaryotic translation initiation factor 2 (eIF-2) family protein	scaffold_5:38595157-38602400	32.6732	8.76175	3.72907	0.000140228	0.00211247
Ciclev10000035m.g	AT1G50240.2	Protein kinase family protein with ARM repeat domain	scaffold_5:35361068-35371122	0.203297	0.101043	2.01198	1	1
Ciclev10000037m.g	AT5G60930.1	P-loop containing nucleoside triphosphate hydrolases superfamily protein	scaffold_5:35583221-35591613	0.387537	0.185266	2.09179	1	1
Ciclev10000038m.g	AT1G75310.1	auxin-like 1 protein	scaffold_5:41184179-41190033	29.9322	5.07269	5.90066	3.21e-05	0.000571295
Ciclev10000039m.g	AT4G38350.1	Patched family protein	scaffold_5:42718714-42734337	39.988	9.46548	4.22461	1.17e-05	0.000228891
Ciclev10000043m.g	AT5G42400.1	SET domain protein 25	scaffold_5:43222581-43234732	7.90548	6.58237	1.20101	0.800252	1
Ciclev10000045m.g	AT1G20720.1	RAD3-like DNA-binding helicase protein	scaffold_5:42809559-42821401	2.06132	1.48247	1.39046	0.681506	1
Ciclev10000047m.g	AT2G02480.1	AAA-type ATPase family protein	scaffold_5:414255-420341	0.754213	0.739523	1.01986	1	1
Ciclev10000050m.g	AT5G42390.1	Insulinase (Peptidase family M16) family protein	scaffold_5:43198202-43209378	86.9852	56.3908	1.54254	0.00743427	0.0617121
Ciclev10000052m.g	AT5G07740.1	actin binding	scaffold_5:27564184-27578397	3.62993	1.53368	2.36681	0.444228	1
Ciclev10000054m.g	AT1G27940.1	P-glycoprotein 13	scaffold_5:42101279-42106547	1.8554	1.01067	1.83581	1	1
Ciclev10000055m.g	AT4G27190.1	NB-ARC domain-containing disease resistance protein	scaffold_5:32339882-32346597	2.07474	0.734255	2.82564	0.365306	0.957432
Ciclev10000059m.g	AT4G24610.1		scaffold_5:35744243-35755651	4.36222	2.03159	2.1472	0.499686	1
Ciclev10000060m.g	AT4G25960.1	P-glycoprotein 2	scaffold_5:27441741-27448756	5.33177	4.7295	1.12734	0.770362	1
Ciclev10000062m.g	AT1G20970.1		scaffold_5:43093043-43098705	10.2147	2.06244	4.95273	0.0320582	0.193993
Ciclev10000063m.g	AT2G02560.2	cullin-associated and neddylation dissociated	scaffold_5:858466-871605	23.9124	11.877	2.01334	0.044178	0.247596
Ciclev10000065m.g	AT3G05380.1	DIRP ;Myb-like DNA-binding domain	scaffold_5:33016989-33027934	9.65225	2.23347	4.32164	0.0530682	0.28528
Ciclev10000066m.g	AT4G27190.1	NB-ARC domain-containing disease resistance protein	scaffold_5:5285908-5290456	10.8767	5.82377	1.86764	0.229966	0.743434
Ciclev10000067m.g	AT1G77620.1	P-loop containing nucleoside triphosphate hydrolases superfamily protein	scaffold_5:37280602-37288224	7.39696	6.24802	1.18389	0.800252	1
Ciclev10000069m.g	AT1G22930.1	T-complex protein 11	scaffold_5:8532279-8539677	41.1776	13.563	3.03602	8.49e-05	0.00135092
Ciclev10000070m.g	AT5G27650.1	Tudor/PWWP/MBT superfamily protein	scaffold_5:33241335-33246175	12.0976	2.99221	4.04303	0.0112673	0.0851672
Ciclev10000072m.g	AT3G05040.1	ARM repeat superfamily protein	scaffold_5:30967584-30977437	4.6893	4.32686	1.08377	1	1
Ciclev10000073m.g	AT3G14470.1	NB-ARC domain-containing disease resistance protein	scaffold_5:35118180-35121835	1.71246	0.479046	3.57473	0.617655	1
Ciclev10000077m.g	AT1G10930.1	DNA helicase (RECQl4A)	scaffold_5:8520323-8529662	0.358131	0.225219	1.59015	1	1
Ciclev10000078m.g	AT5G45140.1	nuclear RNA polymerase C2	scaffold_5:20865262-20886290	14.1805	9.50807	1.49142	0.319561	0.891876
Ciclev10000079m.g	AT4G24560.1	ubiquitin-specific protease 16	scaffold_5:35687309-35694527	20.5772	8.36934	2.45864	0.0271673	0.170361
Ciclev10000080m.g	AT1G21730.1	P-loop containing nucleoside triphosphate hydrolases superfamily protein	scaffold_5:37544496-37560859	3.7285	2.26972	1.64271	0.721429	1
Ciclev10000081m.g	AT5G27240.1	DNAJ heat shock N-terminal domain-containing protein	scaffold_5:31411457-31415480	4.25858	2.6728	1.5933	0.499686	1
Ciclev10000082m.g	AT4G32640.1	Sec23/Sec24 protein transport family protein	scaffold_5:30615375-30629437	25.6335	8.72309	2.93858	0.00346443	0.0331838
Ciclev10000083m.g	AT1G75640.1	Leucine-rich receptor-like protein kinase family protein	scaffold_5:41604995-41608538	0.12947	0.0288301	4.49079	1	1
Ciclev10000084m.g	AT5G27030.1	TOPLESS-related 3	scaffold_5:33791193-33800828	31.748	8.86781	3.58014	0.000225903	0.00323929
Ciclev10000085m.g	AT5G64070.1	phosphatidylinositol 4-OH kinase beta1	scaffold_5:18178125-18191583	16.1835	4.99389	3.24066	0.00942406	0.074492
Ciclev10000086m.g	AT5G63960.1	DNA binding;nucleotide binding;nucleic acid binding;DNA-directed DNA polymerases;DNA-directed DNA polymerases	scaffold_5:16510957-16526623	4.53535	5.60135	0.809689	1	1
Ciclev10000087m.g	AT1G75660.1	5\'-3\' exoribonuclease 3	scaffold_5:41811141-41820743	48.8997	27.3167	1.7901	0.0117841	0.088383
Ciclev10000088m.g	AT1G09620.1	ATP binding;leucine-tRNA ligases;aminoacyl-tRNA ligases;nucleotide binding;ATP binding;aminoacyl-tRNA ligases	scaffold_5:2487210-2492388	22.3954	12.847	1.74324	0.0944989	0.425718
Ciclev10000089m.g	AT3G05630.1	phospholipase D P2	scaffold_5:33758214-33765582	0.856454	0.822577	1.04118	1	1
Ciclev10000092m.g	AT5G42140.1	Regulator of chromosome condensation (RCC1) family with FYVE zinc finger domain	scaffold_5:38499023-38504883	30.5217	9.72371	3.13889	0.000808363	0.00990398
Ciclev10000093m.g	AT1G77680.1	Ribonuclease II/R family protein	scaffold_5:37146864-37152552	7.46886	4.46061	1.6744	0.415672	1
Ciclev10000095m.g	AT1G20760.1	Calcium-binding EF hand family protein	scaffold_5:42827733-42834567	24.6399	12.3224	1.9996	0.0502623	0.273002
Ciclev10000096m.g	AT5G63950.1	chromatin remodeling 24	scaffold_5:16383906-16396185	9.23943	7.32792	1.26085	0.642083	1
Ciclev10000097m.g	AT4G24170.1	ATP binding microtubule motor family protein	scaffold_5:41591990-41597171	3.12467	2.02739	1.54123	0.721429	1
Ciclev10000098m.g	AT3G03050.1	cellulose synthase-like D3	scaffold_5:26641956-26646157	9.05057	2.5142	3.59978	0.0530682	0.28528
Ciclev10000100m.g	AT1G20980.1	squamosa promoter binding protein-like 14	scaffold_5:43108997-43114214	101.619	40.3046	2.52128	8.5e-08	2.48e-06
Ciclev10000102m.g	AT1G19835.1	Plant protein of unknown function (DUF869)	scaffold_5:41765024-41772007	7.92521	10.1829	0.778286	0.648869	1
Ciclev10000103m.g	AT2G21770.1	cellulose synthase A9	scaffold_5:38805240-38812427	3.05701	2.76167	1.10694	0.721429	1
Ciclev10000105m.g	AT1G27595.1		scaffold_5:35093131-35106001	6.45851	3.3503	1.92774	0.379008	0.958688
Ciclev10000108m.g	AT1G76850.1	exocyst complex component sec5	scaffold_5:38626628-38638741	26.6975	14.9844	1.78169	0.0628077	0.320124
Ciclev10000109m.g	AT5G49810.1	methionine S-methyltransferase	scaffold_5:592297-601081	20.0014	10.3208	1.93797	0.0759929	0.366668
Ciclev10000110m.g	AT5G48940.1	Leucine-rich repeat transmembrane protein kinase family protein	scaffold_5:38426629-38430121	0.290885	0.651141	0.446731	1	1
Ciclev10000111m.g	AT4G27190.1	NB-ARC domain-containing disease resistance protein	scaffold_5:5274795-5282044	25.2659	15.3116	1.65011	0.121826	0.499749
Ciclev10000115m.g	AT5G27220.1	Frigida-like protein	scaffold_5:31319624-31325108	1.02576	0.576641	1.77885	0.617655	1
Ciclev10000116m.g	AT1G21650.2	Preprotein translocase SecA family protein	scaffold_5:37735872-37749205	16.7576	8.94917	1.87253	0.116494	0.487271
Ciclev10000117m.g	AT5G64740.1	cellulose synthase 6	scaffold_5:43243673-43249114	0.522303	0.360268	1.44976	1	1
Ciclev10000118m.g	AT5G42870.1	phosphatidic acid phosphohydrolase 2	scaffold_5:40253859-40262178	30.0982	9.84444	3.05738	0.000808363	0.00990398
Ciclev10000119m.g	AT1G34110.1	Leucine-rich receptor-like protein kinase family protein	scaffold_5:39136792-39140384	0.0608772	0.0339857	1.79126	1	1
Ciclev10000120m.g	AT5G26860.1	lon protease 1	scaffold_5:34008553-34016913	10.7241	5.52684	1.94037	0.229966	0.743434
Ciclev10000121m.g	AT4G08350.1	global transcription factor group A2	scaffold_5:38288046-38296128	43.7868	17.9208	2.44335	0.000534434	0.00690626
Ciclev10000122m.g	AT4G24200.1	Transcription elongation factor (TFIIS) family protein	scaffold_5:42042701-42048167	29.1579	17.2073	1.69451	0.082124	0.387651
Ciclev10000123m.g	AT4G27190.1	NB-ARC domain-containing disease resistance protein	scaffold_5:23452527-23456180	0.163505	1e-05	16350.5	1	1
Ciclev10000125m.g	AT5G47820.1	P-loop containing nucleoside triphosphate hydrolases superfamily protein	scaffold_5:39942397-39952725	0.7775	1.05375	0.737841	1	1
Ciclev10000126m.g	AT3G63380.1	ATPase E1-E2 type family protein / haloacid dehalogenase-like hydrolase family protein	scaffold_5:29584087-29587183	0.101178	0.113279	0.893175	1	1
Ciclev10000128m.g	AT3G12280.2	retinoblastoma-related 1	scaffold_5:21203993-21212595	13.6698	6.43015	2.12589	0.127595	0.517056
Ciclev10000129m.g	AT3G63380.1	ATPase E1-E2 type family protein / haloacid dehalogenase-like hydrolase family protein	scaffold_5:26007724-26010936	0.0957867	0.240785	0.39781	1	1
Ciclev10000130m.g	AT1G35220.1		scaffold_5:36049676-36056860	4.42505	2.38967	1.85174	0.499686	1
Ciclev10000131m.g	AT5G27000.1	kinesin 4	scaffold_5:33831343-33837397	0.0245578	0.0274123	0.895868	1	1
Ciclev10000133m.g	AT1G06900.1	Insulinase (Peptidase family M16) family protein	scaffold_5:14105880-14117664	19.5791	17.3471	1.12867	0.746206	1
Ciclev10000134m.g	AT1G27770.1	autoinhibited Ca2+-ATPase 1	scaffold_5:34607063-34612877	113.651	51.7617	2.19566	3.39e-07	8.85e-06
Ciclev10000136m.g	AT4G27190.1	NB-ARC domain-containing disease resistance protein	scaffold_5:23271912-23277658	0.165057	1e-05	16505.7	1	1
Ciclev10000138m.g	AT1G54710.1	homolog of yeast autophagy 18 (ATG18) H	scaffold_5:32250437-32256614	5.28457	2.91896	1.81043	0.334705	0.91579
Ciclev10000139m.g	AT1G80260.1	Spc97 / Spc98 family of spindle pole body (SBP) component	scaffold_5:40472464-40478799	6.55718	7.08386	0.925651	1	1
Ciclev10000140m.g	AT4G11800.1	Calcineurin-like metallo-phosphoesterase superfamily protein	scaffold_5:40363272-40371671	160.03	34.4475	4.64562	8.2e-22	8.45e-20
Ciclev10000141m.g	AT1G45616.1	receptor like protein 6	scaffold_5:20067383-20070734	25.1706	7.50492	3.35388	0.00161834	0.0176994
Ciclev10000142m.g	AT1G10130.1	endoplasmic reticulum-type calcium-transporting ATPase 3	scaffold_5:34716373-34732757	34.9219	17.5174	1.99355	0.0134561	0.0981105
Ciclev10000144m.g	AT5G26850.1	Uncharacterized protein	scaffold_5:34063268-34070535	10.319	4.06361	2.53937	0.136669	0.543253
Ciclev10000146m.g	AT1G21640.1	NAD kinase 2	scaffold_5:37770211-37775957	32.7836	33.4136	0.981145	1	1
Ciclev10000147m.g	AT2G22610.2	Di-glucose binding protein with Kinesin motor domain	scaffold_5:35395148-35401096	0.753353	0.198269	3.79965	1	1
Ciclev10000148m.g	AT5G65700.1	Leucine-rich receptor-like protein kinase family protein	scaffold_5:5126652-5131092	1.50215	0.698111	2.15174	0.617655	1
Ciclev10000149m.g	AT5G06120.4	ARM repeat superfamily protein	scaffold_5:19692511-19713573	10.9141	10.8455	1.00633	1	1
Ciclev10000150m.g	AT1G09010.1	glycoside hydrolase family 2 protein	scaffold_5:32939570-32945214	6.36909	4.91046	1.29705	0.574186	1
Ciclev10000151m.g	AT4G27190.1	NB-ARC domain-containing disease resistance protein	scaffold_5:23309249-23312903	0.859547	0.255563	3.36335	1	1
Ciclev10000152m.g	AT3G23640.1	heteroglycan glucosidase 1	scaffold_5:27492965-27507205	19.8486	12.5923	1.57625	0.223149	0.729068
Ciclev10000154m.g	AT4G11420.1	eukaryotic translation initiation factor 3A	scaffold_5:33811595-33817196	42.8455	18.2452	2.34832	0.00137906	0.015458
Ciclev10000155m.g	AT1G09970.1	Leucine-rich receptor-like protein kinase family protein	scaffold_5:35039707-35043069	24.8996	15.2096	1.6371	0.159099	0.598261
Ciclev10000156m.g	AT1G75820.1	Leucine-rich receptor-like protein kinase family protein	scaffold_5:42071084-42074749	4.54643	1.34406	3.38261	0.279817	0.833852
Ciclev10000159m.g	AT1G77320.1	transcription coactivators	scaffold_5:37782182-37790454	2.30264	1.41775	1.62415	0.681506	1
Ciclev10000161m.g	AT1G78280.1	transferases, transferring glycosyl groups	scaffold_5:36181144-36190607	72.06	42.9939	1.67605	0.00286204	0.0283974
Ciclev10000162m.g	AT1G45616.1	receptor like protein 6	scaffold_5:20003841-20007042	15.319	16.3584	0.936461	1	1
Ciclev10000167m.g	AT1G08720.1	Protein kinase superfamily protein	scaffold_5:30744685-30751821	22.4882	5.74968	3.91121	0.00121065	0.0138673
Ciclev10000168m.g	AT1G54490.1	exoribonuclease 4	scaffold_5:30641621-30651133	22.9133	5.45258	4.20229	0.00121065	0.0138673
Ciclev10000171m.g	AT1G58370.1	glycosyl hydrolase family 10 protein / carbohydrate-binding domain-containing protein	scaffold_5:34929761-34934474	2.75432	1.80403	1.52676	0.681506	1
Ciclev10000172m.g	AT5G42220.1	Ubiquitin-like superfamily protein	scaffold_5:42460203-42468795	35.264	16.8369	2.09445	0.00592253	0.0519006
Ciclev10000174m.g	AT1G06840.1	Leucine-rich repeat protein kinase family protein	scaffold_5:15086105-15095333	27.7313	17.0929	1.62239	0.139467	0.543768
Ciclev10000175m.g	AT4G34310.1	alpha/beta-Hydrolases superfamily protein	scaffold_5:40348116-40353953	5.03241	2.961	1.69956	0.334705	0.91579
Ciclev10000176m.g	AT5G49760.1	Leucine-rich repeat protein kinase family protein	scaffold_5:272938-279075	10.538	11.3694	0.926874	1	1
Ciclev10000177m.g	AT5G43130.1	TBP-associated factor 4	scaffold_5:34507107-34513613	10.1596	6.48258	1.56722	0.351243	0.93552
Ciclev10000178m.g	AT1G09060.3	Zinc finger, RING-type;Transcription factor jumonji/aspartyl beta-hydroxylase	scaffold_5:33225099-33232451	10.7863	15.2034	0.709466	0.444544	1
Ciclev10000179m.g	AT4G27220.1	NB-ARC domain-containing disease resistance protein	scaffold_5:31632151-31635063	0.352798	0.121114	2.91294	1	1
Ciclev10000180m.g	AT1G21740.1	Protein of unknown function (DUF630 and DUF632)	scaffold_5:37502223-37507873	2.89665	1.35843	2.13235	0.681506	1
Ciclev10000182m.g	AT1G34420.1	leucine-rich repeat transmembrane protein kinase family protein	scaffold_5:39477781-39484776	37.9289	50.6787	0.748419	0.245006	0.772195
Ciclev10000183m.g	AT1G19850.1	Transcriptional factor B3 family protein / auxin-responsive factor AUX/IAA-related	scaffold_5:41722612-41729501	4.30896	2.24972	1.91533	0.499686	1
Ciclev10000185m.g	AT1G43850.1	SEUSS transcriptional co-regulator	scaffold_5:38229418-38236940	18.2755	6.87283	2.65909	0.0173828	0.120738
Ciclev10000188m.g	AT1G20640.1	Plant regulator RWP-RK family protein	scaffold_5:42710680-42715502	2.42236	2.17378	1.11435	1	1
Ciclev10000190m.g	AT5G24360.2	inositol requiring 1-1	scaffold_5:42870966-42874870	27.0797	14.9076	1.8165	0.0461558	0.255939
Ciclev10000191m.g	AT1G76810.1	eukaryotic translation initiation factor 2 (eIF-2) family protein	scaffold_5:34269271-34273962	0.285641	0.0265572	10.7557	1	1
Ciclev10000192m.g	AT4G24480.1	Protein kinase superfamily protein	scaffold_5:35502381-35510013	1.58998	1.06405	1.49427	1	1
Ciclev10000193m.g	AT3G11080.1	receptor like protein 35	scaffold_5:1411431-1414337	2.807	1.43545	1.95548	0.681506	1
Ciclev10000195m.g	AT1G42540.1	glutamate receptor 3.3	scaffold_5:42861981-42867071	5.66058	5.46303	1.03616	1	1
Ciclev10000198m.g	AT4G27220.1	NB-ARC domain-containing disease resistance protein	scaffold_5:23637161-23640316	2.13643	0.750339	2.84729	0.365306	0.957432
Ciclev10000199m.g	AT5G49900.1	Beta-glucosidase, GBA2 type family protein	scaffold_5:2303351-2309639	3.05273	5.0046	0.609985	0.754397	1
Ciclev10000200m.g	AT5G63840.1	Glycosyl hydrolases family 31 protein	scaffold_5:15888736-15896759	13.7753	11.6043	1.18709	0.696813	1
Ciclev10000201m.g	AT1G09730.2	Cysteine proteinases superfamily protein	scaffold_5:35610473-35618268	17.6075	13.7856	1.27724	0.480826	1
Ciclev10000202m.g	AT1G54920.3		scaffold_5:32773920-32779114	25.6834	16.6084	1.54641	0.169187	0.624428
Ciclev10000203m.g	AT3G05470.1	Actin-binding FH2 (formin homology 2) family protein	scaffold_5:33276866-33279877	0.127301	0.142458	0.893604	1	1
Ciclev10000204m.g	AT1G22620.1	Phosphoinositide phosphatase family protein	scaffold_5:39682995-39692504	22.3786	14.7242	1.51985	0.193936	0.678634
Ciclev10000205m.g	AT1G22310.2	methyl-CPG-binding domain 8	scaffold_5:36338620-36344138	8.84606	4.27487	2.06932	0.293268	0.849226
Ciclev10000206m.g	AT5G36930.2	Disease resistance protein (TIR-NBS-LRR class) family	scaffold_5:19378553-19383953	8.82972	10.5267	0.838793	0.824505	1
Ciclev10000207m.g	AT5G26910.1		scaffold_5:33908954-33913762	1.72879	1.95976	0.882144	1	1
Ciclev10000208m.g	AT5G49960.1		scaffold_5:5978131-5984111	2.45828	3.13089	0.78517	1	1
Ciclev10000209m.g	AT1G06950.1	translocon at the inner envelope membrane of chloroplasts 110	scaffold_5:12908400-12916815	39.7107	31.9467	1.24303	0.289677	0.843496
Ciclev10000213m.g	AT3G18310.1		scaffold_5:6024578-6027417	3.87394	0.772625	5.014	0.209754	0.713732
Ciclev10000215m.g	AT2G26570.1	Plant protein of unknown function (DUF827)	scaffold_5:40200372-40208310	6.24236	4.33222	1.44091	0.574186	1
Ciclev10000216m.g	AT1G59610.1	dynamin-like 3	scaffold_5:2045916-2057989	1.55269	1.08095	1.43641	1	1
Ciclev10000217m.g	AT2G16250.1	Leucine-rich repeat protein kinase family protein	scaffold_5:41058941-41064267	105.866	38.0644	2.78123	5.1e-09	1.82e-07
Ciclev10000218m.g	AT2G24960.2		scaffold_5:32690028-32694830	10.9181	11.4799	0.951062	1	1
Ciclev10000220m.g	AT1G77760.1	nitrate reductase 1	scaffold_5:36963546-36968045	99.426	12.5164	7.94366	1.1e-18	9.63e-17
Ciclev10000221m.g	AT4G27190.1	NB-ARC domain-containing disease resistance protein	scaffold_5:23561670-23564601	1.64819	0.204144	8.07366	0.617655	1
Ciclev10000223m.g	AT4G27190.1	NB-ARC domain-containing disease resistance protein	scaffold_5:15929730-15932422	1e-05	0.0332652	0.000300614	1	1
Ciclev10000225m.g	AT2G30470.1	high-level expression of sugar-inducible gene 2	scaffold_5:14343906-14350359	3.93713	5.07257	0.776161	0.754397	1
Ciclev10000226m.g	AT4G08550.1	electron carriers;protein disulfide oxidoreductases	scaffold_5:36789179-36794175	20.9543	7.41139	2.82731	0.0146173	0.105229
Ciclev10000227m.g	AT1G09090.2	respiratory burst oxidase homolog B	scaffold_5:33286115-33291455	6.29989	0.903924	6.96949	0.035572	0.209684
Ciclev10000228m.g	AT4G27190.1	NB-ARC domain-containing disease resistance protein	scaffold_5:22922231-22925922	5.71673	2.14176	2.66917	0.334705	0.91579
Ciclev10000229m.g	AT1G19720.1	Pentatricopeptide repeat (PPR-like) superfamily protein	scaffold_5:41420210-41424077	10.5187	12.6329	0.832643	0.83959	1
Ciclev10000230m.g	AT1G47550.1	exocyst complex component sec3A	scaffold_5:40639760-40650497	25.3676	10.242	2.47682	0.0126456	0.0932545
Ciclev10000233m.g	AT5G16780.1	SART-1 family	scaffold_5:5995714-6003233	11.5549	3.96749	2.9124	0.0452596	0.252561
Ciclev10000234m.g	AT5G27680.1	RECQ helicase SIM	scaffold_5:33258591-33265332	2.40943	1.82123	1.32297	0.681506	1
Ciclev10000235m.g	AT5G49730.1	ferric reduction oxidase 6	scaffold_5:120510-126181	5.62172	5.79126	0.970725	1	1
Ciclev10000236m.g	AT1G55020.1	lipoxygenase 1	scaffold_5:32990159-32995860	18.2072	15.5814	1.16852	0.613073	1
Ciclev10000237m.g	AT1G22260.1	Myosin heavy chain-related protein	scaffold_5:36415987-36422893	5.30537	2.95876	1.79311	0.334705	0.91579
Ciclev10000238m.g	AT4G24270.2	EMBRYO DEFECTIVE 140	scaffold_5:803357-811195	41.4335	28.2304	1.46769	0.0966386	0.43194
Ciclev10000240m.g	AT1G42550.1	plastid movement impaired1	scaffold_5:42934683-42937662	2.24149	4.56408	0.491115	0.726999	1
Ciclev10000241m.g	AT3G54350.1	Forkhead-associated (FHA) domain-containing protein	scaffold_5:41536513-41542715	1.57486	2.0485	0.768787	1	1
Ciclev10000243m.g	AT1G31930.1	extra-large GTP-binding protein 3	scaffold_5:26183763-26192455	46.6427	26.5503	1.75677	0.0142537	0.103188
Ciclev10000247m.g	AT4G17770.1	trehalose phosphatase/synthase 5	scaffold_5:27463515-27469472	4.56733	5.31979	0.858555	1	1
Ciclev10000250m.g	AT5G42620.2	metalloendopeptidases;zinc ion binding	scaffold_5:40754816-40761430	10.0874	10.8354	0.930967	1	1
Ciclev10000251m.g	AT1G69770.1	chromomethylase 3	scaffold_5:581145-587422	0.184188	1e-05	18418.8	1	1
Ciclev10000254m.g	AT5G45400.1	Replication factor-A protein 1-related	scaffold_5:24381726-24384719	3.86213	1.15048	3.35697	0.444228	1
Ciclev10000255m.g	AT2G27110.1	FAR1-related sequence 3	scaffold_5:24360294-24367588	5.25478	7.15541	0.734379	0.791112	1
Ciclev10000256m.g	AT2G36390.1	starch branching enzyme 2.1	scaffold_5:42653993-42661287	34.5839	43.5478	0.79416	0.43207	1
Ciclev10000257m.g	AT1G77720.1	putative protein kinase 1	scaffold_5:37071269-37075490	0.162484	0.106569	1.52468	1	1
Ciclev10000260m.g	AT4G36360.1	beta-galactosidase 3	scaffold_5:41432161-41439014	8.19347	11.9441	0.685985	0.664964	1
Ciclev10000262m.g	AT5G46910.1	Transcription factor jumonji (jmj) family protein / zinc finger (C5HC2 type) family protein	scaffold_5:27088043-27093198	115.2	40.06	2.87569	3.42e-10	1.4e-08
Ciclev10000263m.g	AT1G55040.1	zinc finger (Ran-binding) family protein	scaffold_5:33010949-33015057	4.51177	3.32762	1.35585	0.749386	1
Ciclev10000264m.g	AT1G34355.1	forkhead-associated (FHA) domain-containing protein	scaffold_5:39500186-39503920	0.386412	0.0618551	6.24705	1	1
Ciclev10000267m.g	AT5G64580.1	AAA-type ATPase family protein	scaffold_5:18229218-18239197	9.42216	10.6027	0.888657	1	1
Ciclev10000268m.g	AT1G56500.1	haloacid dehalogenase-like hydrolase family protein	scaffold_5:34147315-34157133	11.6803	14.9376	0.78194	0.702655	1
Ciclev10000269m.g	AT4G35790.2	phospholipase D delta	scaffold_5:42322096-42327438	0.0319241	0.0710653	0.449222	1	1
Ciclev10000271m.g	AT1G10270.1	glutamine-rich protein 23	scaffold_5:2073605-2076567	9.29624	4.37533	2.12469	0.202242	0.700734
Ciclev10000273m.g	AT4G22200.1	potassium transport 2/3	scaffold_5:8573280-8583459	4.86343	10.8882	0.44667	0.211575	0.71254
Ciclev10000274m.g	AT4G19440.1	Tetratricopeptide repeat (TPR)-like superfamily protein	scaffold_5:28852991-28857436	2.01145	2.08599	0.964266	1	1
Ciclev10000275m.g	AT4G27190.1	NB-ARC domain-containing disease resistance protein	scaffold_5:30209767-30213485	3.29626	1.68785	1.95293	0.444228	1
Ciclev10000277m.g	AT4G27190.1	NB-ARC domain-containing disease resistance protein	scaffold_5:31469286-31473337	7.30528	3.52914	2.06999	0.258252	0.798092
Ciclev10000281m.g	AT4G33300.1	ADR1-like 1	scaffold_5:40494581-40498159	131.233	111.346	1.17861	0.124156	0.505983
Ciclev10000286m.g	AT3G05670.1	RING/U-box protein	scaffold_5:33846261-33853353	27.8773	6.35999	4.38323	0.000256703	0.00363781
Ciclev10000287m.g	AT4G08850.1	Leucine-rich repeat receptor-like protein kinase family protein	scaffold_5:36445868-36449020	1.57427	0.746025	2.11021	0.617655	1
Ciclev10000289m.g	AT4G15570.1	P-loop containing nucleoside triphosphate hydrolases superfamily protein	scaffold_5:19183059-19192077	6.75833	5.23945	1.28989	0.78685	1
Ciclev10000290m.g	AT5G42920.2	THO complex, subunit 5	scaffold_5:40128390-40138178	21.4847	22.9312	0.93692	1	1
Ciclev10000294m.g	AT1G21651.1	zinc ion binding	scaffold_5:37726071-37731862	9.52848	4.91458	1.93882	0.202242	0.700734
Ciclev10000295m.g	AT1G19870.1	IQ-domain 32	scaffold_5:41694481-41700100	11.129	14.3779	0.774035	0.702655	1
Ciclev10000296m.g	AT4G24190.1	Chaperone protein htpG family protein	scaffold_5:42007123-42011753	109.344	89.9857	1.21513	0.103544	0.450531
Ciclev10000297m.g	AT1G05580.1	cation/H+ exchanger 23	scaffold_5:32733964-32736806	2.96348	1.01567	2.91776	0.681506	1
Ciclev10000298m.g	AT1G76140.1	Prolyl oligopeptidase family protein	scaffold_5:42418836-42424800	178.352	202.713	0.879825	0.413133	0.999304
Ciclev10000301m.g	AT4G07410.1	Transducin family protein / WD-40 repeat family protein	scaffold_5:34707545-34714949	18.6623	13.1077	1.42377	0.38508	0.96198
Ciclev10000302m.g	AT1G65470.1	chromatin assembly factor-1 (FASCIATA1) (FAS1)	scaffold_5:34276104-34281941	1.31605	1.11832	1.17681	1	1
Ciclev10000306m.g	AT1G76390.1	ARM repeat superfamily protein	scaffold_5:42841158-42844776	68.8162	56.7763	1.21206	0.212441	0.71051
Ciclev10000307m.g	AT1G11290.1	Pentatricopeptide repeat (PPR) superfamily protein	scaffold_5:20081413-20086750	4.84842	5.02984	0.963931	1	1
Ciclev10000309m.g	AT1G45231.2	S-adenosyl-L-methionine-dependent methyltransferases superfamily protein	scaffold_5:40128390-40138178	3.14148	5.17533	0.607011	0.754397	1
Ciclev10000310m.g	AT1G09980.1	Putative serine esterase family protein	scaffold_5:19136292-19146196	14.5893	13.983	1.04336	0.853468	1
Ciclev10000311m.g	AT2G34300.1	S-adenosyl-L-methionine-dependent methyltransferases superfamily protein	scaffold_5:38036284-38041507	7.18465	5.43379	1.32222	0.600877	1
Ciclev10000312m.g	AT1G32090.1	early-responsive to dehydration stress protein (ERD4)	scaffold_5:25969556-25975972	0.333079	0.37257	0.894004	1	1
Ciclev10000313m.g	AT4G08180.1	OSBP(oxysterol binding protein)-related protein 1C	scaffold_5:37043416-37051080	105.199	23.8064	4.41894	2.05e-14	1.29e-12
Ciclev10000315m.g	AT4G27190.1	NB-ARC domain-containing disease resistance protein	scaffold_5:30111178-30113590	5.69304	1.71307	3.3233	0.171554	0.6304
Ciclev10000316m.g	AT2G47430.1	Signal transduction histidine kinase	scaffold_5:33970381-33974347	21.4164	17.3224	1.23634	0.527717	1
Ciclev10000322m.g	AT1G25360.1	Pentatricopeptide repeat (PPR) superfamily protein	scaffold_5:41588808-41591747	2.47058	1.2168	2.03039	0.681506	1
Ciclev10000323m.g	AT4G27190.1	NB-ARC domain-containing disease resistance protein	scaffold_5:30043537-30045934	4.4186	1.6708	2.6446	0.279817	0.833852
Ciclev10000324m.g	AT1G05150.1	Calcium-binding tetratricopeptide family protein	scaffold_5:41582117-41585127	27.4028	7.04512	3.88961	0.000635433	0.00800307
Ciclev10000325m.g	AT1G62830.1	LSD1-like 1	scaffold_5:42492097-42494989	7.27906	2.34898	3.09882	0.138749	0.546024
Ciclev10000326m.g	AT3G48090.1	alpha/beta-Hydrolases superfamily protein	scaffold_5:1089866-1094215	1.99656	1.76991	1.12806	1	1
Ciclev10000327m.g	AT4G27190.1	NB-ARC domain-containing disease resistance protein	scaffold_5:29917519-29920233	1.75987	1.02411	1.71844	1	1
Ciclev10000328m.g	AT5G64030.1	S-adenosyl-L-methionine-dependent methyltransferases superfamily protein	scaffold_5:16635631-16640424	58.3307	35.4857	1.64378	0.0133639	0.0975116
Ciclev10000329m.g	AT4G27220.1	NB-ARC domain-containing disease resistance protein	scaffold_5:30096449-30098995	3.02366	0.641505	4.71338	0.209754	0.713732
Ciclev10000330m.g	AT1G42440.1		scaffold_5:42618465-42624771	32.2063	15.0373	2.14176	0.0142786	0.10329
Ciclev10000331m.g	AT4G27190.1	NB-ARC domain-containing disease resistance protein	scaffold_5:30006502-30009263	6.8775	2.37205	2.89939	0.218039	0.723111
Ciclev10000333m.g	AT1G10390.1	Nucleoporin autopeptidase	scaffold_5:26136985-26141621	1.52043	0.290661	5.23094	0.617655	1
Ciclev10000334m.g	AT1G21980.1	phosphatidylinositol-4-phosphate 5-kinase 1	scaffold_5:37030668-37035492	3.81101	2.2463	1.69657	0.721429	1
Ciclev10000335m.g	AT1G75850.1	VPS35 homolog B	scaffold_5:42113620-42120391	23.217	17.3006	1.34198	0.354722	0.93718
Ciclev10000336m.g	AT5G49890.1	chloride channel C	scaffold_5:2059128-2063462	13.4771	11.518	1.17009	0.696813	1
Ciclev10000337m.g	AT1G78160.1	pumilio 7	scaffold_5:36452982-36458601	1e-05	0.255038	3.92e-05	1	1
Ciclev10000338m.g	AT4G26090.1	NB-ARC domain-containing disease resistance protein	scaffold_5:24930730-24933418	4.36301	3.53861	1.23297	0.749386	1
Ciclev10000339m.g	AT1G20160.1	Subtilisin-like serine endopeptidase family protein	scaffold_5:42194475-42197926	2.07301	3.15618	0.65681	1	1
Ciclev10000341m.g	AT1G77030.1	hydrolases, acting on acid anhydrides, in phosphorus-containing anhydrides;ATP-dependent helicases;nucleic acid binding;ATP binding;RNA binding;helicases	scaffold_5:38127346-38134197	14.8207	7.91059	1.87353	0.145214	0.561087
Ciclev10000342m.g	AT1G60890.2	Phosphatidylinositol-4-phosphate 5-kinase family protein	scaffold_5:9950355-9958602	6.38841	6.56077	0.973729	1	1
Ciclev10000343m.g	AT1G21610.1	wound-responsive family protein	scaffold_5:37790998-37797703	8.61257	4.2672	2.01832	0.293268	0.849226
Ciclev10000344m.g	AT3G01610.1	cell division cycle 48C	scaffold_5:811792-817028	13.6777	10.1058	1.35345	0.551167	1
Ciclev10000345m.g	AT3G47570.1	Leucine-rich repeat protein kinase family protein	scaffold_5:17707311-17710634	2.65389	2.29229	1.15775	1	1
Ciclev10000346m.g	AT1G22610.1	C2 calcium/lipid-binding plant phosphoribosyltransferase family protein	scaffold_5:39774139-39776871	0.296879	0.0662005	4.48454	1	1
Ciclev10000347m.g	AT4G09020.1	isoamylase 3	scaffold_5:36036989-36048487	9.29591	9.46892	0.981729	1	1
Ciclev10000348m.g	AT5G49570.1	peptide-N-glycanase 1	scaffold_5:29691666-29699867	22.237	18.5157	1.20098	0.53763	1
Ciclev10000349m.g	AT1G20160.1	Subtilisin-like serine endopeptidase family protein	scaffold_5:23717648-23726446	3.88088	4.29179	0.904257	1	1
Ciclev10000351m.g	AT5G35370.1	S-locus lectin protein kinase family protein	scaffold_5:37134498-37138336	1.36828	0.363399	3.76523	0.617655	1
Ciclev10000352m.g	AT1G78060.1	Glycosyl hydrolase family protein	scaffold_5:36588686-36592786	16.0299	18.1984	0.880841	0.868885	1
Ciclev10000353m.g	AT1G05460.1	P-loop containing nucleoside triphosphate hydrolases superfamily protein	scaffold_5:30767754-30771272	10.695	7.41487	1.44237	0.496375	1
Ciclev10000354m.g	AT4G30110.1	heavy metal atpase 2	scaffold_5:4479508-4484003	0.113003	0.0841712	1.34254	1	1
Ciclev10000355m.g	AT5G64570.1	beta-D-xylosidase 4	scaffold_5:22304299-22309822	4.85796	4.64434	1.046	1	1
Ciclev10000358m.g	AT1G77280.1	Protein kinase protein with adenine nucleotide alpha hydrolases-like domain	scaffold_5:37849212-37853413	1.29769	2.12789	0.609848	1	1
Ciclev10000359m.g	AT3G19720.1	P-loop containing nucleoside triphosphate hydrolases superfamily protein	scaffold_5:22227782-22238036	6.53485	6.10516	1.07038	1	1
Ciclev10000360m.g	AT3G47570.1	Leucine-rich repeat protein kinase family protein	scaffold_5:6566512-6569101	19.5674	12.2058	1.60312	0.223149	0.729068
Ciclev10000361m.g	AT1G58350.1	Putative serine esterase family protein	scaffold_5:35014124-35021589	18.1929	10.8984	1.66932	0.143841	0.558908
Ciclev10000363m.g	AT5G67360.1	Subtilase family protein	scaffold_5:34479396-34482201	2.08104	4.25517	0.489062	0.726999	1
Ciclev10000364m.g	AT5G67090.1	Subtilisin-like serine endopeptidase family protein	scaffold_5:40040263-40042949	2.02257	0.584981	3.4575	0.365306	0.957432
Ciclev10000365m.g	AT1G54790.3	GDSL-like Lipase/Acylhydrolase superfamily protein	scaffold_5:31863795-31870938	2.24131	3.09452	0.724284	1	1
Ciclev10000367m.g	AT3G05090.1	Transducin/WD40 repeat-like superfamily protein	scaffold_5:30816504-30825183	36.263	22.4313	1.61662	0.0531343	0.284451
Ciclev10000370m.g	AT5G10940.2	transducin family protein / WD-40 repeat family protein	scaffold_5:35817026-35826170	13.2226	11.1111	1.19004	0.696813	1
Ciclev10000372m.g	AT5G42480.1	Chaperone DnaJ-domain superfamily protein	scaffold_5:41597240-41602791	10.2434	12.6021	0.812833	0.83959	1
Ciclev10000375m.g	AT1G75150.1		scaffold_5:40932836-40937518	5.03738	2.30298	2.18733	0.334705	0.91579
Ciclev10000376m.g	AT1G71820.1	SEC6	scaffold_5:39655306-39664615	2.99467	3.21621	0.931118	1	1
Ciclev10000378m.g	AT1G54570.1	Esterase/lipase/thioesterase family protein	scaffold_5:30828997-30836351	19.8427	38.0737	0.521166	0.0260345	0.164644
Ciclev10000379m.g	AT2G21790.1	ribonucleotide reductase 1	scaffold_5:38887374-38894064	2.019	2.2939	0.88016	1	1
Ciclev10000382m.g	AT1G75730.1		scaffold_5:41902167-41907204	7.50508	4.3676	1.71835	0.415672	1
Ciclev10000383m.g	AT4G38180.1	FAR1-related sequence 5	scaffold_5:43053903-43057074	6.99204	6.15647	1.13572	1	1
Ciclev10000386m.g	AT3G22690.2		scaffold_5:34226353-34229316	4.39253	4.40445	0.997294	1	1
Ciclev10000387m.g	AT3G04910.1	with no lysine (K) kinase 1	scaffold_5:30567036-30570413	2.33466	1.74894	1.3349	0.681506	1
Ciclev10000389m.g	AT4G36550.1	ARM repeat superfamily protein	scaffold_5:41126217-41131143	31.4812	20.6965	1.52109	0.101125	0.446936
Ciclev10000392m.g	AT1G58520.1	lipases;hydrolases, acting on ester bonds	scaffold_5:34866518-34875003	1.17392	1.86329	0.630025	1	1
Ciclev10000393m.g	AT5G63810.1	beta-galactosidase 10	scaffold_5:15822059-15834446	1.95516	3.68532	0.530527	0.687874	1
Ciclev10000394m.g	AT5G27240.1	DNAJ heat shock N-terminal domain-containing protein	scaffold_5:31431360-31433856	3.4739	1.3321	2.60784	0.444228	1
Ciclev10000395m.g	AT1G71820.1	SEC6	scaffold_5:39644419-39654027	20.3413	23.3135	0.872512	0.768038	1
Ciclev10000396m.g	AT5G66850.1	mitogen-activated protein kinase kinase kinase 5	scaffold_5:40479670-40485358	83.8316	32.8277	2.55368	6.59e-07	1.64e-05
Ciclev10000397m.g	AT1G07390.3	receptor like protein 1	scaffold_5:28099256-28102069	31.7555	9.51484	3.33747	0.000516309	0.00670336
Ciclev10000400m.g	AT4G35300.1	tonoplast monosaccharide transporter2	scaffold_5:42918370-42923480	7.95729	11.0846	0.717869	0.505168	1
Ciclev10000404m.g	AT3G23640.1	heteroglycan glucosidase 1	scaffold_5:27526156-27539324	2.53519	1.65278	1.53389	0.681506	1
Ciclev10000405m.g	AT1G21700.1	SWITCH/sucrose nonfermenting 3C	scaffold_5:37626184-37632397	26.2823	17.0915	1.53774	0.179026	0.641657
Ciclev10000407m.g	AT1G75100.1	J-domain protein required for chloroplast accumulation response 1	scaffold_5:40863026-40868561	25.4855	25.7319	0.990424	0.890775	1
Ciclev10000408m.g	AT5G63700.1	zinc ion binding;DNA binding	scaffold_5:2209340-2219438	9.26331	7.85672	1.17903	0.642083	1
Ciclev10000409m.g	AT4G16630.1	DEA(D/H)-box RNA helicase family protein	scaffold_5:42030907-42037427	26.3587	21.591	1.22082	0.475343	1
Ciclev10000411m.g	AT5G67090.1	Subtilisin-like serine endopeptidase family protein	scaffold_5:40046649-40048839	1e-05	0.0448968	0.000222733	1	1
Ciclev10000412m.g	AT5G12080.1	mechanosensitive channel of small conductance-like 10	scaffold_5:24430820-24436636	2.31871	2.97824	0.77855	1	1
Ciclev10000415m.g	AT3G05610.1	Plant invertase/pectin methylesterase inhibitor superfamily	scaffold_5:33642730-33648714	39.6845	46.1316	0.860245	0.593305	1
Ciclev10000416m.g	AT2G40360.1	Transducin/WD40 repeat-like superfamily protein	scaffold_5:6447014-6453641	53.6406	47.0055	1.14116	0.430338	1
Ciclev10000418m.g	AT5G08720.1		scaffold_5:7288320-7296238	1.2251	2.89436	0.423271	1	1
Ciclev10000419m.g	AT5G49880.1	mitotic checkpoint family protein	scaffold_5:936144-943658	17.9954	15.5102	1.16023	0.732466	1
Ciclev10000420m.g	AT5G63800.1	Glycosyl hydrolase family 35 protein	scaffold_5:15801848-15810954	0.314568	0.352971	0.891201	1	1
Ciclev10000421m.g	AT1G55200.1	Protein kinase protein with adenine nucleotide alpha hydrolases-like domain	scaffold_5:40589993-40595575	1.11052	0.851833	1.30368	0.617655	1
Ciclev10000422m.g	AT5G42270.1	FtsH extracellular protease family	scaffold_5:42541636-42545268	117.653	114.761	1.0252	0.646605	1
Ciclev10000424m.g	AT4G09630.1	Protein of unknown function (DUF616)	scaffold_5:39451877-39457800	5.08952	5.76202	0.883287	1	1
Ciclev10000425m.g	AT1G21680.1	DPP6 N-terminal domain-like protein	scaffold_5:37669429-37671959	6.17106	9.41505	0.655446	0.630241	1
Ciclev10000426m.g	AT1G27460.1	no pollen germination related 1	scaffold_5:34654084-34657430	0.916954	1.87869	0.488082	1	1
Ciclev10000427m.g	AT5G26710.1	Glutamyl/glutaminyl-tRNA synthetase, class Ic	scaffold_5:2472804-2477375	53.2071	34.1877	1.55632	0.0334286	0.200158
Ciclev10000428m.g	AT1G77270.1		scaffold_5:37871001-37874887	2.21833	4.85322	0.457084	0.726999	1
Ciclev10000430m.g	AT1G60560.1	SWIM zinc finger family protein	scaffold_5:17812396-17816822	22.3471	23.0821	0.968157	1	1
Ciclev10000431m.g	AT3G01680.1		scaffold_5:20550262-20553313	1.52392	3.20247	0.475858	0.687874	1
Ciclev10000432m.g	AT5G25070.1		scaffold_5:43249555-43252914	14.4465	4.25356	3.39633	0.0242004	0.155638
Ciclev10000433m.g	AT5G49910.1	chloroplast heat shock protein 70-2	scaffold_5:4974787-4979217	84.2459	76.7723	1.09735	0.388209	0.963949
Ciclev10000434m.g	AT1G19520.1	pentatricopeptide (PPR) repeat-containing protein	scaffold_5:41132581-41135791	5.77201	6.06745	0.951307	1	1
Ciclev10000437m.g	AT4G07960.1	Cellulose-synthase-like C12	scaffold_5:34837869-34841284	60.6745	59.3025	1.02314	0.785418	1
Ciclev10000438m.g	AT3G05270.1	Plant protein of unknown function (DUF869)	scaffold_5:37407958-37411524	1.50932	2.78897	0.541175	1	1
Ciclev10000439m.g	AT5G58270.1	ABC transporter of the mitochondrion 3	scaffold_5:14967947-14980202	25.7797	28.6489	0.89985	0.892891	1
Ciclev10000440m.g	AT4G11160.1	Translation initiation factor 2, small GTP-binding protein	scaffold_5:29817690-29822386	11.8605	8.02099	1.47868	0.516764	1
Ciclev10000444m.g	AT5G45380.1	solute:sodium symporters;urea transmembrane transporters	scaffold_5:27554715-27559349	58.1178	67.5832	0.859944	0.594973	1
Ciclev10000445m.g	AT3G26540.1	Tetratricopeptide repeat (TPR)-like superfamily protein	scaffold_5:38078578-38080699	3.05449	2.08572	1.46448	0.721429	1
Ciclev10000447m.g	AT5G63770.1	diacylglycerol kinase 2	scaffold_5:15564479-15571647	7.41917	3.87394	1.91515	0.258252	0.798092
Ciclev10000448m.g	AT2G13600.1	Pentatricopeptide repeat (PPR) superfamily protein	scaffold_5:17103752-17105870	4.6101	4.46652	1.03215	1	1
Ciclev10000450m.g	AT1G21590.1	Protein kinase protein with adenine nucleotide alpha hydrolases-like domain	scaffold_5:42121458-42125439	50.3907	22.4384	2.24573	0.000660518	0.00827057
Ciclev10000451m.g	AT5G42310.1	Pentatricopeptide repeat (PPR-like) superfamily protein	scaffold_5:42626290-42630000	5.32553	10.4092	0.511618	0.333962	0.916089
Ciclev10000454m.g	AT5G28300.1	Duplicated homeodomain-like superfamily protein	scaffold_5:29808452-29811460	0.674983	0.877891	0.768869	1	1
Ciclev10000456m.g	AT1G10240.1	FAR1-related sequence 11	scaffold_5:2200715-2205513	11.9617	8.68373	1.37748	0.516764	1
Ciclev10000457m.g	AT1G71810.1	Protein kinase superfamily protein	scaffold_5:39227920-39237745	10.8518	11.9551	0.907713	1	1
Ciclev10000458m.g	AT4G24490.1	RAB geranylgeranyl transferase alpha subunit 1	scaffold_5:35517170-35521219	17.7924	14.6816	1.21188	0.602697	1
Ciclev10000459m.g	AT5G42940.1	RING/U-box superfamily protein	scaffold_5:40007932-40012920	51.1966	14.5438	3.52017	2e-06	4.54e-05
Ciclev10000461m.g	AT5G27600.1	long-chain acyl-CoA synthetase 7	scaffold_5:32951374-32963622	26.7849	27.7658	0.964672	1	1
Ciclev10000462m.g	AT1G31814.1	FRIGIDA like 2	scaffold_5:31075839-31079709	1.63459	0.35463	4.60928	0.617655	1
Ciclev10000463m.g	AT1G78240.1	S-adenosyl-L-methionine-dependent methyltransferases superfamily protein	scaffold_5:36317431-36322995	35.604	37.1518	0.958338	1	1
Ciclev10000464m.g	AT1G16120.1	wall associated kinase-like 1	scaffold_5:5001604-5005111	4.38479	6.29169	0.696918	0.774954	1
Ciclev10000465m.g	AT1G58200.1	MSCS-like 3	scaffold_5:35598114-35604350	126.291	35.3057	3.57707	6.03e-14	3.6e-12
Ciclev10000466m.g	AT1G77590.1	long chain acyl-CoA synthetase 9	scaffold_5:37349892-37356610	3.52898	3.17106	1.11287	1	1
Ciclev10000467m.g	AT1G61010.1	cleavage and polyadenylation specificity factor 73-I	scaffold_5:6756342-6760450	12.8706	9.40816	1.36803	0.5349	1
Ciclev10000468m.g	AT1G61010.1	cleavage and polyadenylation specificity factor 73-I	scaffold_5:6764540-6768459	5.38675	3.23347	1.66593	0.541376	1
Ciclev10000469m.g	AT4G24520.1	P450 reductase 1	scaffold_5:35542503-35548256	28.4502	27.8676	1.02091	0.792567	1
Ciclev10000471m.g	AT1G78230.1	Outer arm dynein light chain 1 protein	scaffold_5:36327602-36331343	21.3496	11.5058	1.85555	0.0852508	0.396227
Ciclev10000476m.g	AT1G51580.1	RNA-binding KH domain-containing protein	scaffold_5:34994036-35002166	10.5177	7.9498	1.32301	0.496375	1
Ciclev10000478m.g	AT4G08210.1	Pentatricopeptide repeat (PPR-like) superfamily protein	scaffold_5:37082517-37084817	4.63013	5.38152	0.860376	1	1
Ciclev10000479m.g	AT1G09600.1	Protein kinase superfamily protein	scaffold_5:2479777-2485129	0.69879	1.21716	0.574115	1	1
Ciclev10000480m.g	AT1G77280.1	Protein kinase protein with adenine nucleotide alpha hydrolases-like domain	scaffold_5:16238638-16242339	6.26853	9.95372	0.629768	0.630241	1
Ciclev10000481m.g	AT1G20670.1	DNA-binding bromodomain-containing protein	scaffold_5:42782826-42787711	22.6937	7.53878	3.01026	0.00622004	0.0538014
Ciclev10000482m.g	AT1G09000.1	NPK1-related protein kinase 1	scaffold_5:32912953-32917197	2.19142	2.25951	0.969865	1	1
Ciclev10000483m.g	AT1G75260.1	oxidoreductases, acting on NADH or NADPH	scaffold_5:41138185-41140305	1.05718	0.349779	3.02242	0.617655	1
Ciclev10000484m.g	AT1G71240.1	Plant protein of unknown function (DUF639)	scaffold_5:11336688-11346938	11.8533	7.51956	1.57633	0.375548	0.955555
Ciclev10000487m.g	AT4G19020.1	chromomethylase 2	scaffold_5:25805803-25815252	0.779862	0.873381	0.892923	1	1
Ciclev10000488m.g	AT5G16860.1	Tetratricopeptide repeat (TPR)-like superfamily protein	scaffold_5:27589715-27592562	3.5531	1.423	2.49691	0.444228	1
Ciclev10000490m.g	AT5G45300.1	beta-amylase 2	scaffold_5:29131688-29139331	24.6295	25.9386	0.949531	1	1
Ciclev10000491m.g	AT1G59750.4	auxin response factor 1	scaffold_5:953166-960232	52.9226	31.1406	1.69947	0.0165496	0.116328
Ciclev10000494m.g	AT3G04750.1	Tetratricopeptide repeat (TPR)-like superfamily protein	scaffold_5:29424164-29437482	3.05413	2.35289	1.29803	0.721429	1
Ciclev10000495m.g	AT1G77010.1	Pentatricopeptide repeat (PPR) superfamily protein	scaffold_5:38081414-38083994	3.75598	3.01616	1.24529	1	1
Ciclev10000500m.g	AT1G56560.1	Plant neutral invertase family protein	scaffold_5:34232950-34237382	52.3198	22.0287	2.37507	0.000321251	0.00443881
Ciclev10000502m.g	AT5G09590.1	mitochondrial HSO70 2	scaffold_5:5323875-5327356	8.2321	6.70783	1.22724	0.623141	1
Ciclev10000504m.g	AT3G05420.2	acyl-CoA binding protein 4	scaffold_5:33233157-33240431	17.5377	13.6705	1.28289	0.480826	1
Ciclev10000505m.g	AT1G60995.1		scaffold_5:9223467-9232859	35.0249	47.8316	0.732254	0.276403	0.826605
Ciclev10000508m.g	AT1G75410.1	BEL1-like homeodomain 3	scaffold_5:41372512-41377106	3.67953	3.33404	1.10363	1	1
Ciclev10000510m.g	AT4G37870.1	phosphoenolpyruvate carboxykinase 1	scaffold_5:35125018-35129817	1.0595	0.948586	1.11693	0.617655	1
Ciclev10000511m.g	AT2G23450.1	Protein kinase superfamily protein	scaffold_5:40608944-40612620	0.12714	0.188659	0.673914	1	1
Ciclev10000513m.g	AT5G58300.1	Leucine-rich repeat protein kinase family protein	scaffold_5:15187009-15191417	1.45313	0.664557	2.18661	0.617655	1
Ciclev10000514m.g	AT3G52640.1	Zn-dependent exopeptidases superfamily protein	scaffold_5:26960451-26976490	22.6683	12.2569	1.84943	0.0944989	0.425718
Ciclev10000515m.g	AT2G33580.1	Protein kinase superfamily protein	scaffold_5:43170340-43172802	29.7988	21.5814	1.38076	0.215475	0.717929
Ciclev10000518m.g	AT5G43020.1	Leucine-rich repeat protein kinase family protein	scaffold_5:39934354-39937311	2.19567	0.623426	3.52194	0.365306	0.957432
Ciclev10000521m.g	AT1G77990.1	STAS domain / Sulfate transporter family	scaffold_5:36698868-36703010	61.9841	63.6492	0.973839	1	1
Ciclev10000524m.g	AT1G73100.1	SU(VAR)3-9 homolog 3	scaffold_5:19682578-19686163	8.84441	8.2922	1.06659	1	1
Ciclev10000525m.g	AT1G10910.1	Pentatricopeptide repeat (PPR) superfamily protein	scaffold_5:9928430-9935604	17.7622	29.7736	0.596575	0.114821	0.481834
Ciclev10000527m.g	AT3G05340.1	Tetratricopeptide repeat (TPR)-like superfamily protein	scaffold_5:32937344-32939324	2.86997	3.06295	0.936995	1	1
Ciclev10000528m.g	AT1G22150.1	sulfate transporter 1;3	scaffold_5:36680107-36686830	77.8592	47.0179	1.65595	0.00420767	0.0388978
Ciclev10000531m.g	AT5G28540.1	heat shock protein 70 (Hsp 70) family protein	scaffold_5:33273052-33276013	0.640158	1.39503	0.458885	1	1
Ciclev10000532m.g	AT1G49890.1	Family of unknown function (DUF566)	scaffold_5:34533360-34540306	7.62376	3.98053	1.91526	0.258252	0.798092
Ciclev10000533m.g	AT1G35510.1	O-fucosyltransferase family protein	scaffold_5:39292572-39299263	4.79028	10.5968	0.45205	0.211575	0.71254
Ciclev10000534m.g	AT1G75140.1		scaffold_5:40929752-40932152	16.2124	13.8728	1.16865	0.59146	1
Ciclev10000536m.g	AT1G10090.1	Early-responsive to dehydration stress protein (ERD4)	scaffold_5:24115896-24122184	0.37825	0.0605553	6.24636	1	1
Ciclev10000537m.g	AT4G34110.1	poly(A) binding protein 2	scaffold_5:39992233-39996269	99.1507	57.4051	1.72721	0.000325257	0.00448775
Ciclev10000538m.g	AT1G18610.1	Galactose oxidase/kelch repeat superfamily protein	scaffold_5:34128462-34131986	0.166016	0.231964	0.715697	1	1
Ciclev10000539m.g	AT5G01720.1	RNI-like superfamily protein	scaffold_5:12689295-12694012	2.13173	2.60024	0.81982	1	1
Ciclev10000541m.g	AT5G27540.1	MIRO-related GTP-ase 1	scaffold_5:32889613-32896199	38.3284	26.1175	1.46754	0.110017	0.470135
Ciclev10000542m.g	AT4G24430.1	Rhamnogalacturonate lyase family protein	scaffold_5:35350023-35354136	0.0773844	1e-05	7738.44	1	1
Ciclev10000543m.g	AT1G09890.1	Rhamnogalacturonate lyase family protein	scaffold_5:35320977-35325107	0.545088	0.520246	1.04775	1	1
Ciclev10000547m.g	AT1G34320.1	Protein of unknown function (DUF668)	scaffold_5:39534245-39541218	15.1486	16.1892	0.935723	1	1
Ciclev10000549m.g	AT3G05270.1	Plant protein of unknown function (DUF869)	scaffold_5:15594240-15600036	6.25911	8.35132	0.749476	0.804245	1
Ciclev10000550m.g	AT3G49170.1	Tetratricopeptide repeat (TPR)-like superfamily protein	scaffold_5:35237123-35239618	8.83933	18.8584	0.468721	0.0889144	0.40652
Ciclev10000551m.g	AT2G35540.1	DNAJ heat shock N-terminal domain-containing protein	scaffold_5:26539930-26542156	1.6095	0.895413	1.79749	0.617655	1
Ciclev10000552m.g	AT5G27220.1	Frigida-like protein	scaffold_5:31325787-31328723	0.0538039	1e-05	5380.39	1	1
Ciclev10000554m.g	AT4G33400.1	Vacuolar import/degradation, Vid27-related protein	scaffold_5:40196231-40199730	2.13574	0.867188	2.46283	0.365306	0.957432
Ciclev10000557m.g	AT2G13610.1	ABC-2 type transporter family protein	scaffold_5:17106093-17108296	0.0390585	0.131212	0.297675	1	1
Ciclev10000558m.g	AT5G27920.1	F-box family protein	scaffold_5:33698384-33702211	22.7653	14.203	1.60285	0.193936	0.678634
Ciclev10000559m.g	AT1G43620.1	UDP-Glycosyltransferase superfamily protein	scaffold_5:38753374-38762034	11.3944	9.20711	1.23757	0.672788	1
Ciclev10000562m.g	AT5G27950.1	P-loop containing nucleoside triphosphate hydrolases superfamily protein	scaffold_5:30804009-30807677	2.48075	3.34636	0.741328	1	1
Ciclev10000564m.g	AT5G49980.1	auxin F-box protein 5	scaffold_5:35862624-35867133	13.8835	11.9705	1.15981	0.696813	1
Ciclev10000565m.g	AT5G43100.1	Eukaryotic aspartyl protease family protein	scaffold_5:34395663-34402100	53.5567	23.4954	2.27945	0.000385605	0.00521267
Ciclev10000566m.g	AT4G35240.1	Protein of unknown function (DUF630 and DUF632)	scaffold_5:42555316-42559854	0.543589	0.806116	0.674331	1	1
Ciclev10000567m.g	AT4G09730.1	RH39	scaffold_5:39146389-39150157	32.7658	35.9431	0.911602	0.904381	1
Ciclev10000570m.g	AT3G05350.1	Metallopeptidase M24 family protein	scaffold_5:32951374-32963622	34.4567	23.6104	1.45939	0.119485	0.493596
Ciclev10000571m.g	AT3G48670.1	XH/XS domain-containing protein	scaffold_5:12159642-12164071	2.3577	2.20513	1.06919	1	1
Ciclev10000572m.g	AT5G64550.1	loricrin-related	scaffold_5:22271542-22276598	9.16669	4.73131	1.93745	0.202242	0.700734
Ciclev10000573m.g	AT1G43690.1	ubiquitin interaction motif-containing protein	scaffold_5:38609929-38615996	26.0133	18.9289	1.37426	0.237793	0.758352
Ciclev10000574m.g	AT4G23180.1	cysteine-rich RLK (RECEPTOR-like protein kinase) 10	scaffold_5:30857555-30860780	26.9218	26.9185	1.00012	0.892693	1
Ciclev10000575m.g	AT2G26920.1	Ubiquitin-associated/translation elongation factor EF1B protein	scaffold_5:20140864-20144990	41.5143	12.2633	3.38525	3.94e-05	0.000685208
Ciclev10000576m.g	AT3G52430.1	alpha/beta-Hydrolases superfamily protein	scaffold_5:15998433-16007071	74.6862	23.1556	3.22541	8.53e-08	2.49e-06
Ciclev10000577m.g	AT5G59100.1	Subtilisin-like serine endopeptidase family protein	scaffold_5:19103572-19108067	7.01951	2.93478	2.39184	0.138749	0.546024
Ciclev10000581m.g	AT4G23180.1	cysteine-rich RLK (RECEPTOR-like protein kinase) 10	scaffold_5:32148510-32153975	4.87011	5.96067	0.817041	1	1
Ciclev10000582m.g	AT1G72090.1	Methylthiotransferase	scaffold_5:39782165-39791254	7.40296	7.43427	0.995788	1	1
Ciclev10000583m.g	AT3G02280.1	Flavodoxin family protein	scaffold_5:37295740-37302243	5.57683	8.89732	0.626799	0.608335	1
Ciclev10000585m.g	AT1G53570.1	mitogen-activated protein kinase kinase kinase 3	scaffold_5:17906312-17911447	191.362	65.8728	2.90502	1.22e-16	9.25e-15
Ciclev10000586m.g	AT3G05740.1	RECQ helicase l1	scaffold_5:33902777-33906708	0.13318	0.347065	0.383732	1	1
Ciclev10000587m.g	AT5G39450.1	F-box family protein	scaffold_5:16129645-16133090	47.8259	36.0667	1.32604	0.19288	0.67555
Ciclev10000591m.g	AT4G08920.1	cryptochrome 1	scaffold_5:36371906-36378249	18.934	20.9245	0.904872	0.875626	1
Ciclev10000592m.g	AT5G52560.1	UDP-sugar pyrophosphorylase	scaffold_5:37876853-37884032	39.0289	26.3315	1.48221	0.0873995	0.401967
Ciclev10000593m.g	AT1G76890.2	Duplicated homeodomain-like superfamily protein	scaffold_5:38658342-38661581	18.1156	9.46091	1.91478	0.0939009	0.424803
Ciclev10000595m.g	AT1G76550.1	Phosphofructokinase family protein	scaffold_5:43060441-43066562	46.9982	44.1141	1.06538	0.754621	1
Ciclev10000596m.g	AT5G45275.1	Major facilitator superfamily protein	scaffold_5:28837054-28840605	13.1862	5.61751	2.34734	0.0735601	0.35959
Ciclev10000597m.g	AT1G71830.1	somatic embryogenesis receptor-like kinase 1	scaffold_5:39630110-39635609	3.17551	3.04497	1.04287	1	1
Ciclev10000599m.g	AT1G54510.1	NIMA-related serine/threonine kinase 1	scaffold_5:29840773-29846737	1.13413	1.05428	1.07574	1	1
Ciclev10000600m.g	AT5G49720.1	glycosyl hydrolase 9A1	scaffold_5:113390-116883	20.9636	15.2455	1.37507	0.411734	0.998666
Ciclev10000601m.g	AT1G43245.1	SET domain-containing protein	scaffold_5:38772866-38775306	2.10002	1.9756	1.06298	0.681506	1
Ciclev10000602m.g	AT5G27330.1	Prefoldin chaperone subunit family protein	scaffold_5:32296452-32298508	0.374018	0.160634	2.32839	1	1
Ciclev10000603m.g	AT4G24620.1	phosphoglucose isomerase 1	scaffold_5:35757161-35762784	22.9662	11.2314	2.04482	0.0617109	0.316534
Ciclev10000604m.g	AT1G19715.3	Mannose-binding lectin superfamily protein	scaffold_5:41409272-41411910	25.7162	24.0417	1.06965	0.781631	1
Ciclev10000605m.g	AT1G09900.1	Pentatricopeptide repeat (PPR-like) superfamily protein	scaffold_5:35262240-35264675	9.36284	19.1713	0.488378	0.100747	0.446079
Ciclev10000608m.g	AT3G20770.1	Ethylene insensitive 3 family protein	scaffold_5:24103195-24107361	108.178	55.008	1.96659	1.12e-05	0.000219257
Ciclev10000610m.g	AT1G11050.1	Protein kinase superfamily protein	scaffold_5:37707495-37709444	5.41105	2.42833	2.2283	0.334705	0.91579
Ciclev10000611m.g	AT1G76400.1	Ribophorin I	scaffold_5:42898493-42904653	23.1219	24.3006	0.951495	1	1
Ciclev10000612m.g	AT1G34190.1	NAC domain containing protein 17	scaffold_5:39216417-39219746	133.625	157.852	0.846521	0.292607	0.847946
Ciclev10000613m.g	AT1G30755.1	Protein of unknown function (DUF668)	scaffold_5:41957505-41962278	274.801	128.37	2.14069	1.28e-14	8.18e-13
Ciclev10000614m.g	AT2G33640.1	DHHC-type zinc finger family protein	scaffold_5:42888592-42893193	0.500224	0.604604	0.827358	1	1
Ciclev10000617m.g	AT3G20770.1	Ethylene insensitive 3 family protein	scaffold_5:24110460-24114358	55.1035	28.1568	1.95702	0.00220589	0.0228474
Ciclev10000618m.g	AT1G11050.1	Protein kinase superfamily protein	scaffold_5:37701505-37703583	85.9996	86.9479	0.989093	0.879261	1
Ciclev10000620m.g	AT5G18570.1	GTP1/OBG family protein	scaffold_5:41455031-41460155	10.6316	14.1952	0.748957	0.55926	1
Ciclev10000621m.g	AT4G24040.1	trehalase 1	scaffold_5:6028330-6034400	15.25	7.48981	2.0361	0.102352	0.449893
Ciclev10000622m.g	AT1G09710.1	Homeodomain-like superfamily protein	scaffold_5:35548958-35554067	16.5149	12.7693	1.29333	0.466828	1
Ciclev10000623m.g	AT4G23180.1	cysteine-rich RLK (RECEPTOR-like protein kinase) 10	scaffold_5:32186366-32189739	1.89947	1.48268	1.28111	1	1
Ciclev10000624m.g	AT1G19025.1	DNA repair metallo-beta-lactamase family protein	scaffold_5:17900801-17904488	0.90732	1.76774	0.513266	1	1
Ciclev10000625m.g	AT5G58320.2	Kinase interacting (KIP1-like) family protein	scaffold_5:15344389-15349025	12.5287	12.728	0.984342	1	1
Ciclev10000627m.g	AT1G76880.1	Duplicated homeodomain-like superfamily protein	scaffold_5:38669122-38672110	13.5374	14.7776	0.916076	1	1
Ciclev10000628m.g	AT1G08490.1	chloroplastic NIFS-like cysteine desulfurase	scaffold_5:18239993-18242476	0.0457137	0.0512553	0.891882	1	1
Ciclev10000629m.g	AT3G48090.1	alpha/beta-Hydrolases superfamily protein	scaffold_5:1130225-1132747	0.707669	0.556551	1.27153	1	1
Ciclev10000630m.g	AT1G56570.1	Tetratricopeptide repeat (TPR)-like superfamily protein	scaffold_5:34230287-34232445	4.42901	6.29347	0.703747	0.774954	1
Ciclev10000631m.g	AT5G09860.1	nuclear matrix protein-related	scaffold_5:21144033-21157038	17.1291	20.0545	0.854128	0.751153	1
Ciclev10000632m.g	AT1G09280.1		scaffold_5:34207131-34210961	4.8433	5.99128	0.808392	1	1
Ciclev10000635m.g	AT1G36990.1		scaffold_5:36931439-36936819	12.8399	6.24212	2.05698	0.182072	0.647418
Ciclev10000637m.g	AT4G24290.2	MAC/Perforin domain-containing protein	scaffold_5:5087959-5093839	130.36	99.064	1.31592	0.0210939	0.140033
Ciclev10000638m.g	AT1G31920.1	Tetratricopeptide repeat (TPR)-like superfamily protein	scaffold_5:26493800-26495822	4.13003	4.51404	0.91493	1	1
Ciclev10000639m.g	AT1G59740.1	Major facilitator superfamily protein	scaffold_5:885889-888954	0.768212	1.79798	0.427264	1	1
Ciclev10000643m.g	AT1G31850.1	S-adenosyl-L-methionine-dependent methyltransferases superfamily protein	scaffold_5:24399708-24405331	61.138	48.2545	1.26699	0.155221	0.588479
Ciclev10000645m.g	AT5G58350.1	with no lysine (K) kinase 4	scaffold_5:13531936-13535930	47.6167	93.2675	0.510539	0.000285741	0.00399955
Ciclev10000648m.g	AT1G31420.2	Leucine-rich repeat protein kinase family protein	scaffold_5:27842975-27853846	25.2145	34.8699	0.723102	0.370366	0.951371
Ciclev10000649m.g	AT5G26820.1	iron-regulated protein 3	scaffold_5:34121548-34126463	14.0386	9.4196	1.49036	0.319561	0.891876
Ciclev10000650m.g	AT3G12270.1	protein arginine methyltransferase 3	scaffold_5:21243492-21247521	4.60909	8.69309	0.530202	0.425266	1
Ciclev10000651m.g	AT4G34200.1	D-3-phosphoglycerate dehydrogenase	scaffold_5:39858530-39862402	6.76769	7.31012	0.925797	1	1
Ciclev10000652m.g	AT1G38131.1	O-fucosyltransferase family protein	scaffold_5:37086126-37091907	0.426558	0.998459	0.427216	1	1
Ciclev10000653m.g	AT4G23180.1	cysteine-rich RLK (RECEPTOR-like protein kinase) 10	scaffold_5:32017898-32022118	25.0974	11.0765	2.26582	0.0219509	0.144582
Ciclev10000654m.g	AT2G38470.1	WRKY DNA-binding protein 33	scaffold_5:12677413-12680761	380.467	570.119	0.667347	2.73e-08	8.61e-07
Ciclev10000656m.g	AT1G22020.1	serine hydroxymethyltransferase 6	scaffold_5:36848456-36853497	102.41	44.9625	2.27768	5.69e-07	1.43e-05
Ciclev10000657m.g	AT2G01970.1	Endomembrane protein 70 protein family	scaffold_5:477921-482332	15.0071	6.92802	2.16615	0.0598058	0.310381
Ciclev10000659m.g	AT3G18600.1	P-loop containing nucleoside triphosphate hydrolases superfamily protein	scaffold_5:9197773-9204364	22.8346	18.1004	1.26155	0.53763	1
Ciclev10000662m.g	AT5G50350.1		scaffold_5:24313313-24318602	7.17793	5.81568	1.23424	0.600877	1
Ciclev10000670m.g	AT1G10950.1	transmembrane nine 1	scaffold_5:8440415-8447120	114.409	74.4046	1.53766	0.00173585	0.0186889
Ciclev10000671m.g	AT1G21450.1	SCARECROW-like 1	scaffold_5:38177342-38180338	69.2	38.1959	1.81171	0.00151	0.0167128
Ciclev10000672m.g	AT1G58025.3	DNA-binding bromodomain-containing protein	scaffold_5:5328722-5334079	24.0566	18.2528	1.31797	0.365861	0.94205
Ciclev10000673m.g	AT2G30520.1	Phototropic-responsive NPH3 family protein	scaffold_5:15113861-15117721	54.1016	17.7719	3.04422	5.64e-06	0.000118647
Ciclev10000678m.g	AT5G42350.1	Galactose oxidase/kelch repeat superfamily protein	scaffold_5:42845471-42848054	10.1148	5.72312	1.76736	0.229966	0.743434
Ciclev10000682m.g	AT4G09160.1	SEC14 cytosolic factor family protein / phosphoglyceride transfer family protein	scaffold_5:39700146-39702942	66.6147	29.9507	2.22415	9.32e-05	0.00146338
Ciclev10000685m.g	AT2G32910.1	DCD (Development and Cell Death) domain protein	scaffold_5:31437533-31441415	13.0715	8.64127	1.51268	0.29988	0.856964
Ciclev10000688m.g	AT1G08490.1	chloroplastic NIFS-like cysteine desulfurase	scaffold_5:18358820-18361410	0.462416	0.632188	0.731453	1	1
Ciclev10000689m.g	AT1G57770.1	FAD/NAD(P)-binding oxidoreductase family protein	scaffold_5:4471259-4476173	13.818	15.2337	0.907068	0.856398	1
Ciclev10000690m.g	AT1G31970.1	DEA(D/H)-box RNA helicase family protein	scaffold_5:25999616-26006856	51.2332	36.8357	1.39086	0.0893328	0.407759
Ciclev10000691m.g	AT1G22660.1	Polynucleotide adenylyltransferase family protein	scaffold_5:39356005-39361396	2.52758	4.06559	0.621701	0.726999	1
Ciclev10000692m.g	AT1G45207.2	Remorin family protein	scaffold_5:40112334-40116721	0.650701	1.70973	0.380587	1	1
Ciclev10000693m.g	AT1G77850.1	auxin response factor 17	scaffold_5:36863308-36868015	3.18651	5.97961	0.532896	0.754397	1
Ciclev10000694m.g	AT3G18150.1	RNI-like superfamily protein	scaffold_5:17595312-17598089	9.77321	11.7808	0.829588	0.832549	1
Ciclev10000698m.g	AT1G54610.1	Protein kinase superfamily protein	scaffold_5:30994811-30999834	8.41581	8.05595	1.04467	1	1
Ciclev10000699m.g	AT4G19040.1	ENHANCED DISEASE RESISTANCE 2	scaffold_5:24819165-24829795	50.2905	49.6658	1.01258	0.766466	1
Ciclev10000702m.g	AT1G58100.1	TCP family transcription factor	scaffold_5:6482365-6484923	10.3238	6.98442	1.47812	0.351243	0.93552
Ciclev10000704m.g	AT1G09195.2		scaffold_5:33886877-33891304	10.0298	4.26037	2.35421	0.136669	0.543253
Ciclev10000706m.g	AT1G22460.1	O-fucosyltransferase family protein	scaffold_5:36090417-36095771	31.594	34.4295	0.917643	0.902956	1
Ciclev10000707m.g	AT1G20110.1	RING/FYVE/PHD zinc finger superfamily protein	scaffold_5:42139641-42144610	41.7707	15.6622	2.66698	0.000340087	0.00465587
Ciclev10000708m.g	AT1G76270.1	O-fucosyltransferase family protein	scaffold_5:42601357-42605843	9.05295	10.3374	0.875747	1	1
Ciclev10000709m.g	AT1G75450.1	cytokinin oxidase 5	scaffold_5:41394567-41399755	12.2754	3.99862	3.06991	0.0281315	0.174878
Ciclev10000710m.g	AT5G57190.1	phosphatidylserine decarboxylase 2	scaffold_5:21809061-21827750	53.7962	47.717	1.1274	0.430338	1
Ciclev10000711m.g	AT2G32910.1	DCD (Development and Cell Death) domain protein	scaffold_5:31424465-31428834	3.71298	0.907527	4.09132	0.209754	0.713732
Ciclev10000713m.g	AT1G09810.1	evolutionarily conserved C-terminal region 11	scaffold_5:5309894-5315706	89.7049	54.8738	1.63475	0.00201162	0.0210948
Ciclev10000716m.g			scaffold_5:31001059-31004619	2.36156	1.65774	1.42457	0.681506	1
Ciclev10000719m.g	AT1G22540.1	Major facilitator superfamily protein	scaffold_5:39705412-39708788	33.8522	35.187	0.962066	1	1
Ciclev10000720m.g	AT5G25800.1	Polynucleotidyl transferase, ribonuclease H-like superfamily protein	scaffold_5:38180687-38186303	6.06066	7.51421	0.80656	1	1
Ciclev10000721m.g	AT1G77140.1	vacuolar protein sorting 45	scaffold_5:38379424-38384975	20.0374	14.1461	1.41646	0.317721	0.888022
Ciclev10000722m.g	AT5G42740.1	Sugar isomerase (SIS) family protein	scaffold_5:40972046-40979507	86.3398	54.0089	1.59862	0.00416012	0.0385873
Ciclev10000723m.g	AT2G20340.1	Pyridoxal phosphate (PLP)-dependent transferases superfamily protein	scaffold_5:39740866-39742793	11.3742	1.76855	6.43137	0.00641462	0.05492
Ciclev10000724m.g	AT1G65280.1	DNAJ heat shock N-terminal domain-containing protein	scaffold_5:39438263-39443543	8.63674	5.85128	1.47604	0.446636	1
Ciclev10000725m.g	AT1G77250.1	RING/FYVE/PHD-type zinc finger family protein	scaffold_5:37904978-37910963	8.2147	7.09285	1.15817	0.811424	1
Ciclev10000727m.g	AT1G20920.1	P-loop containing nucleoside triphosphate hydrolases superfamily protein	scaffold_5:15349807-15357863	25.6897	26.7401	0.960718	1	1
Ciclev10000728m.g	AT5G27380.1	glutathione synthetase 2	scaffold_5:31895664-31900513	51.2119	43.1343	1.18727	0.358295	0.945199
Ciclev10000732m.g	AT5G64330.1	Phototropic-responsive NPH3 family protein	scaffold_5:32720670-32722787	0.941998	1.74068	0.541167	1	1
Ciclev10000733m.g	AT2G18750.1	Calmodulin-binding protein	scaffold_5:33879329-33882234	90.3419	46.2766	1.95222	7.8e-05	0.00125479
Ciclev10000734m.g	AT5G27220.1	Frigida-like protein	scaffold_5:31307195-31309895	2.47841	2.97175	0.83399	1	1
Ciclev10000735m.g	AT4G19010.1	AMP-dependent synthetase and ligase family protein	scaffold_5:25965962-25969199	0.276058	0.24649	1.11996	1	1
Ciclev10000738m.g	AT1G22540.1	Major facilitator superfamily protein	scaffold_5:39713348-39716184	0.943744	1.22013	0.773478	1	1
Ciclev10000739m.g	AT5G49650.1	xylulose kinase-2	scaffold_5:35022339-35027549	5.7184	6.65742	0.858951	1	1
Ciclev10000740m.g	AT2G13690.1	PRLI-interacting factor, putative	scaffold_5:18156521-18160252	1.33192	2.15186	0.618962	1	1
Ciclev10000741m.g	AT2G38720.1	microtubule-associated protein 65-5	scaffold_5:20581813-20588381	0.34558	0.337677	1.0234	1	1
Ciclev10000742m.g	AT1G20410.1	Pseudouridine synthase family protein	scaffold_5:42427317-42432272	5.60632	7.42537	0.755022	0.791112	1
Ciclev10000747m.g	AT3G06130.1	Heavy metal transport/detoxification superfamily protein	scaffold_5:32672661-32675477	0.388557	0.334076	1.16308	1	1
Ciclev10000749m.g	AT1G71800.1	cleavage stimulating factor 64	scaffold_5:39221209-39227401	10.4965	4.5277	2.31829	0.136669	0.543253
Ciclev10000750m.g	AT5G16260.1	RNA binding (RRM/RBD/RNP motifs) family protein	scaffold_5:34301652-34308746	13.568	9.55083	1.42061	0.417183	1
Ciclev10000751m.g	AT1G58340.1	MATE efflux family protein	scaffold_5:35074023-35076069	6.59489	2.92551	2.25427	0.218039	0.723111
Ciclev10000753m.g	AT5G27460.1	Tetratricopeptide repeat (TPR)-like superfamily protein	scaffold_5:35913858-35917123	3.47783	1.88641	1.84362	0.444228	1
Ciclev10000754m.g	AT1G21540.1	AMP-dependent synthetase and ligase family protein	scaffold_5:37928343-37930048	1.07647	1.96442	0.547984	1	1
Ciclev10000755m.g	AT1G20560.1	acyl activating enzyme 1	scaffold_5:42641055-42643541	3.65053	5.25427	0.694774	0.754397	1
Ciclev10000756m.g	AT3G11440.1	myb domain protein 65	scaffold_5:19740132-19745806	24.4309	20.137	1.21323	0.555766	1
Ciclev10000757m.g	AT5G43820.1	Pentatricopeptide repeat (PPR) superfamily protein	scaffold_5:42824869-42827344	1.38232	1.69748	0.814337	1	1
Ciclev10000758m.g	AT3G05060.1	NOP56-like pre RNA processing ribonucleoprotein	scaffold_5:19019402-19023198	27.8431	24.9717	1.11499	0.586032	1
Ciclev10000759m.g	AT1G56310.1	Polynucleotidyl transferase, ribonuclease H-like superfamily protein	scaffold_5:33894993-33900482	2.10524	2.24899	0.936082	1	1
Ciclev10000760m.g	AT4G38430.1	rho guanyl-nucleotide exchange factor 1	scaffold_5:42409836-42412693	0.655276	1.23474	0.5307	1	1
Ciclev10000761m.g	AT1G76490.1	hydroxy methylglutaryl CoA reductase 1	scaffold_5:43016597-43020200	10.7874	3.99185	2.70236	0.0717948	0.35382
Ciclev10000762m.g	AT5G24910.1	cytochrome P450, family 714, subfamily A, polypeptide 1	scaffold_5:20554135-20561666	95.2899	41.3142	2.30647	1.35e-06	3.18e-05
Ciclev10000763m.g	AT1G43770.2	RING/FYVE/PHD zinc finger superfamily protein	scaffold_5:38477880-38481495	33.0254	9.32196	3.54275	0.000206846	0.00298593
Ciclev10000764m.g	AT1G20510.1	OPC-8:0 CoA ligase1	scaffold_5:42516005-42519605	129.199	49.5278	2.60862	3.05e-10	1.26e-08
Ciclev10000765m.g	AT1G58290.1	Glutamyl-tRNA reductase family protein	scaffold_5:35137903-35140955	107.446	61.0529	1.75988	0.000157583	0.00233576
Ciclev10000767m.g	AT4G35890.1	winged-helix DNA-binding transcription factor family protein	scaffold_5:42217934-42222257	36.8644	20.4646	1.80137	0.0256495	0.162581
Ciclev10000768m.g	AT3G57620.1	glyoxal oxidase-related protein	scaffold_5:30732823-30734566	0.182529	0.0677068	2.69587	1	1
Ciclev10000769m.g	AT2G03220.1	fucosyltransferase 1	scaffold_5:20113870-20116341	143.946	46.7458	3.07934	1.24e-13	7.26e-12
Ciclev10000770m.g	AT1G76620.1	Protein of unknown function, DUF547	scaffold_5:43153229-43157156	2.14293	5.51751	0.388387	0.508598	1
Ciclev10000772m.g	AT5G57960.1	GTP-binding protein, HflX	scaffold_5:41364332-41369139	53.7451	68.5176	0.784398	0.279514	0.833206
Ciclev10000775m.g	AT1G43710.1	Pyridoxal phosphate (PLP)-dependent transferases superfamily protein	scaffold_5:38559098-38562819	19.5299	15.1002	1.29335	0.505883	1
Ciclev10000776m.g	AT4G34240.1	aldehyde dehydrogenase 3I1	scaffold_5:15735613-15740485	80.1531	114.705	0.698776	0.0321773	0.194167
Ciclev10000779m.g	AT2G26510.1	Xanthine/uracil permease family protein	scaffold_5:40500030-40505210	72.3975	35.8319	2.02048	0.000169386	0.00249351
Ciclev10000781m.g	AT3G05030.1	sodium hydrogen exchanger 2	scaffold_5:31069236-31075092	21.7564	25.393	0.856787	0.668481	1
Ciclev10000782m.g	AT1G22940.1	thiamin biosynthesis protein, putative	scaffold_5:8512379-8517973	6.92445	6.34845	1.09073	1	1
Ciclev10000783m.g	AT1G76160.1	SKU5 similar 5	scaffold_5:42445213-42449994	0.629501	0.201261	3.12778	1	1
Ciclev10000784m.g	AT2G03220.1	fucosyltransferase 1	scaffold_5:20105818-20108873	77.9344	22.5922	3.44962	1.01e-08	3.42e-07
Ciclev10000788m.g	AT2G30300.1	Major facilitator superfamily protein	scaffold_5:12881996-12884304	1.10341	0.906286	1.21751	0.617655	1
Ciclev10000789m.g	AT1G20300.1	Pentatricopeptide repeat (PPR) superfamily protein	scaffold_5:42286704-42288426	4.55077	3.26216	1.39502	0.749386	1
Ciclev10000790m.g	AT5G49970.1	pyridoxin (pyrodoxamine) 5\'-phosphate oxidase	scaffold_5:35872808-35878812	8.40741	6.87817	1.22233	0.623141	1
Ciclev10000792m.g	AT1G52640.1	Pentatricopeptide repeat (PPR) superfamily protein	scaffold_5:16368132-16371600	4.84468	3.5076	1.3812	0.749386	1
Ciclev10000793m.g	AT3G52950.1	CBS / octicosapeptide/Phox/Bemp1 (PB1) domains-containing protein	scaffold_5:15579156-15591668	44.5694	56.0404	0.795308	0.372836	0.955816
Ciclev10000794m.g	AT1G77110.1	Auxin efflux carrier family protein	scaffold_5:38323685-38328788	1e-05	0.0666987	0.000149928	1	1
Ciclev10000795m.g	AT2G16090.1	RING/U-box superfamily protein	scaffold_5:40683486-40688354	11.4405	11.9652	0.956148	1	1
Ciclev10000797m.g	AT1G72040.1	P-loop containing nucleoside triphosphate hydrolases superfamily protein	scaffold_5:39306388-39310225	9.25267	7.50949	1.23213	0.642083	1
Ciclev10000798m.g	AT1G19880.1	Regulator of chromosome condensation (RCC1) family protein	scaffold_5:41672134-41678524	36.9836	27.2904	1.35519	0.216118	0.718215
Ciclev10000799m.g	AT5G39590.1	TLD-domain containing nucleolar protein	scaffold_5:41711565-41715301	6.25436	9.07158	0.689445	0.630241	1
Ciclev10000800m.g	AT1G75210.1	HAD-superfamily hydrolase, subfamily IG, 5\'-nucleotidase	scaffold_5:41049807-41055693	18.854	14.9165	1.26397	0.493806	1
Ciclev10000803m.g	AT1G32130.1	Transcription elongation factor (TFIIS) family protein	scaffold_5:26514898-26519011	69.3546	32.0746	2.16229	0.000152663	0.00227852
Ciclev10000804m.g	AT1G72160.1	Sec14p-like phosphatidylinositol transfer family protein	scaffold_5:39693591-39696240	11.6835	9.27046	1.26029	0.672788	1
Ciclev10000806m.g	AT1G20080.1	Calcium-dependent lipid-binding (CaLB domain) family protein	scaffold_5:42079047-42083003	1.15946	1.67295	0.693063	1	1
Ciclev10000807m.g	AT5G08740.1	NAD(P)H dehydrogenase C1	scaffold_5:15623323-15630017	22.1917	32.3443	0.686109	0.28493	0.83495
Ciclev10000808m.g	AT1G30700.1	FAD-binding Berberine family protein	scaffold_5:29385813-29387910	1.43853	1.20175	1.19703	1	1
Ciclev10000809m.g	AT4G31940.1	cytochrome P450, family 82, subfamily C, polypeptide 4	scaffold_5:26839045-26841490	46.5128	33.2841	1.39745	0.119513	0.493396
Ciclev10000810m.g	AT4G20820.1	FAD-binding Berberine family protein	scaffold_5:5161093-5163853	22.0647	23.8621	0.924676	1	1
Ciclev10000811m.g	AT5G44400.1	FAD-binding Berberine family protein	scaffold_5:8241246-8243511	2.90788	1.94518	1.49492	0.681506	1
Ciclev10000812m.g	AT1G21660.1	Chaperone DnaJ-domain superfamily protein	scaffold_5:37693881-37699178	79.772	25.8435	3.08673	4.45e-08	1.37e-06
Ciclev10000813m.g	AT4G20820.1	FAD-binding Berberine family protein	scaffold_5:5198673-5200885	10.1183	6.18634	1.63559	0.351243	0.93552
Ciclev10000814m.g	AT4G20820.1	FAD-binding Berberine family protein	scaffold_5:8181010-8183247	157.573	115.745	1.36138	0.0044443	0.0408318
Ciclev10000815m.g	AT5G10080.1	Eukaryotic aspartyl protease family protein	scaffold_5:36726565-36731153	3.46783	7.62623	0.454724	0.388852	0.965298
Ciclev10000816m.g	AT3G05620.1	Plant invertase/pectin methylesterase inhibitor superfamily	scaffold_5:33695911-33697986	0.0480191	0.480512	0.0999332	1	1
Ciclev10000817m.g	AT4G20820.1	FAD-binding Berberine family protein	scaffold_5:5213078-5216672	80.5857	35.3282	2.28106	1.12e-05	0.000219296
Ciclev10000819m.g	AT1G76430.1	phosphate transporter 1;9	scaffold_5:42959353-42961730	54.1286	54.2502	0.997759	0.849252	1
Ciclev10000821m.g	AT1G44446.1	Pheophorbide a oxygenase family protein with Rieske [2Fe-2S] domain	scaffold_5:37429289-37433447	2.18594	6.10243	0.358208	0.344732	0.927493
Ciclev10000822m.g	AT2G03220.1	fucosyltransferase 1	scaffold_5:20137874-20140608	95.3692	91.6461	1.04062	0.609751	1
Ciclev10000825m.g	AT5G42650.1	allene oxide synthase	scaffold_5:40617690-40619818	151.337	49.2022	3.07582	3.75e-14	2.28e-12
Ciclev10000826m.g	AT1G47240.1	NRAMP metal ion transporter 2	scaffold_5:34386297-34390000	8.89485	4.9806	1.7859	0.293268	0.849226
Ciclev10000827m.g	AT2G21520.2	Sec14p-like phosphatidylinositol transfer family protein	scaffold_5:41258613-41263689	9.87979	6.01303	1.64306	0.473225	1
Ciclev10000828m.g	AT1G71880.1	sucrose-proton symporter 1	scaffold_5:39525922-39529412	168.703	69.5484	2.42569	1.3e-11	6.32e-10
Ciclev10000831m.g	AT1G47056.1	VIER F-box proteine 1	scaffold_5:39888653-39890854	29.0685	9.18276	3.16555	0.00125747	0.0142853
Ciclev10000834m.g	AT5G64630.2	Transducin/WD40 repeat-like superfamily protein	scaffold_5:18390056-18395489	5.53277	6.76223	0.818187	1	1
Ciclev10000835m.g	AT1G22410.1	Class-II DAHP synthetase family protein	scaffold_5:36196012-36199839	369.507	53.9382	6.85056	5.55e-62	2.07e-59
Ciclev10000836m.g	AT5G20890.1	TCP-1/cpn60 chaperonin family protein	scaffold_5:42437642-42442753	31.7543	27.8387	1.14065	0.520979	1
Ciclev10000838m.g	AT1G20370.1	Pseudouridine synthase family protein	scaffold_5:42371840-42373931	15.8227	14.1939	1.11475	0.858104	1
Ciclev10000839m.g	AT1G58440.1	FAD/NAD(P)-binding oxidoreductase family protein	scaffold_5:34815380-34819982	16.8275	8.64109	1.94738	0.116494	0.487271
Ciclev10000841m.g	AT1G47670.1	Transmembrane amino acid transporter family protein	scaffold_5:40534832-40539098	17.4215	13.4474	1.29553	0.480826	1
Ciclev10000842m.g	AT1G27680.1	ADPGLC-PPase large subunit	scaffold_5:41201214-41208112	16.8886	15.0653	1.12103	0.862332	1
Ciclev10000843m.g	AT1G08960.1	cation exchanger 11	scaffold_5:32695469-32699067	14.7748	6.15784	2.39935	0.0879987	0.404627
Ciclev10000844m.g	AT4G31940.1	cytochrome P450, family 82, subfamily C, polypeptide 4	scaffold_5:26217705-26220288	165.72	57.2997	2.89216	2.19e-14	1.36e-12
Ciclev10000845m.g	AT4G31940.1	cytochrome P450, family 82, subfamily C, polypeptide 4	scaffold_5:26866035-26868420	4.14438	13.0614	0.3173	0.0645597	0.32733
Ciclev10000846m.g	AT4G31940.1	cytochrome P450, family 82, subfamily C, polypeptide 4	scaffold_5:26691139-26693785	0.836879	0.570873	1.46596	1	1
Ciclev10000847m.g	AT1G77220.1	Protein of unknown function (DUF300)	scaffold_5:38393281-38398923	40.2761	41.8173	0.963144	1	1
Ciclev10000848m.g	AT2G40890.1	cytochrome P450, family 98, subfamily A, polypeptide 3	scaffold_5:20487351-20489738	1.65141	5.62546	0.29356	0.289848	0.843614
Ciclev10000849m.g	AT1G75680.1	glycosyl hydrolase 9B7	scaffold_5:41833069-41836812	0.201695	0.720844	0.279804	1	1
Ciclev10000850m.g	AT1G34370.1	C2H2 and C2HC zinc fingers superfamily protein	scaffold_5:39495950-39498826	162.066	160.372	1.01056	0.656811	1
Ciclev10000851m.g	AT4G31940.1	cytochrome P450, family 82, subfamily C, polypeptide 4	scaffold_5:26790423-26792763	12.6659	14.5115	0.872818	0.851387	1
Ciclev10000852m.g	AT4G31970.1	cytochrome P450, family 82, subfamily C, polypeptide 2	scaffold_5:40582687-40584770	4.25428	3.6723	1.15848	0.749386	1
Ciclev10000853m.g	AT1G34220.2	Regulator of Vps4 activity in the MVB pathway protein	scaffold_5:39626614-39629746	11.263	7.86268	1.43246	0.375548	0.955555
Ciclev10000854m.g	AT1G43980.1	Tetratricopeptide repeat (TPR)-like superfamily protein	scaffold_5:38085441-38087688	3.13703	5.14882	0.609272	0.754397	1
Ciclev10000855m.g	AT1G71870.1	MATE efflux family protein	scaffold_5:39559029-39561472	1e-05	0.058624	0.000170579	1	1
Ciclev10000856m.g	AT4G24460.1	CRT (chloroquine-resistance transporter)-like transporter 2	scaffold_5:35408651-35414270	1.04346	0.494889	2.10847	0.617655	1
Ciclev10000858m.g	AT5G64600.1	O-fucosyltransferase family protein	scaffold_5:18221784-18227885	4.82305	9.24171	0.521879	0.303219	0.863068
Ciclev10000859m.g	AT3G10660.1	calmodulin-domain protein kinase cdpk isoform 2	scaffold_5:24321451-24323997	0.495792	0.220539	2.24809	1	1
Ciclev10000860m.g	AT4G12320.1	cytochrome P450, family 706, subfamily A, polypeptide 6	scaffold_5:7063960-7066280	0.0481587	0.215832	0.22313	1	1
Ciclev10000861m.g	AT1G78130.1	Major facilitator superfamily protein	scaffold_5:36475617-36479093	7.15003	4.33245	1.65034	0.415672	1
Ciclev10000863m.g	AT5G58370.2	P-loop containing nucleoside triphosphate hydrolases superfamily protein	scaffold_5:13199739-13204599	8.3764	8.3421	1.00411	1	1
Ciclev10000865m.g	AT4G02630.1	Protein kinase superfamily protein	scaffold_5:40025747-40029150	20.4294	15.4635	1.32114	0.411734	0.998666
Ciclev10000866m.g	AT3G26300.1	cytochrome P450, family 71, subfamily B, polypeptide 34	scaffold_5:147384-149164	2.43099	0.879234	2.7649	0.365306	0.957432
Ciclev10000867m.g	AT5G18475.1	Pentatricopeptide repeat (PPR) superfamily protein	scaffold_5:35771867-35774649	5.83594	4.52995	1.2883	0.770362	1
Ciclev10000869m.g	AT5G49820.1	Protein of unknown function, DUF647	scaffold_5:833390-839741	40.122	7.86481	5.10146	8.62e-07	2.1e-05
Ciclev10000871m.g	AT5G10920.1	L-Aspartase-like family protein	scaffold_5:35574051-35577732	15.5189	27.3143	0.56816	0.0990525	0.440188
Ciclev10000874m.g	AT3G06350.1	dehydroquinate dehydratase, putative / shikimate dehydrogenase, putative	scaffold_5:31403726-31408001	192.123	33.5717	5.72277	1.06e-29	1.64e-27
Ciclev10000875m.g	AT5G26780.1	serine hydroxymethyltransferase 2	scaffold_5:35241679-35246264	11.5074	10.7252	1.07293	0.836317	1
Ciclev10000876m.g	AT5G09890.1	Protein kinase family protein	scaffold_5:40154568-40160983	169.043	58.4535	2.89192	8.32e-15	5.48e-13
Ciclev10000877m.g	AT1G09830.1	Glycinamide ribonucleotide (GAR) synthetase	scaffold_5:4939532-4944344	6.12656	2.58194	2.37285	0.218039	0.723111
Ciclev10000878m.g	AT1G28390.1	Protein kinase superfamily protein	scaffold_5:35840434-35842867	3.20749	5.06888	0.632781	0.754397	1
Ciclev10000880m.g	AT4G24530.1	O-fucosyltransferase family protein	scaffold_5:35604950-35608649	3.89694	3.22429	1.20862	1	1
Ciclev10000881m.g	AT4G33280.1	AP2/B3-like transcriptional factor family protein	scaffold_5:40550221-40554434	9.22417	19.5765	0.471186	0.100747	0.446079
Ciclev10000884m.g	AT5G25900.1	GA requiring 3	scaffold_5:4487162-4490184	15.6318	17.9595	0.870392	0.865085	1
Ciclev10000885m.g			scaffold_5:28802466-28809144	3.3665	6.73399	0.499926	0.549728	1
Ciclev10000886m.g	AT4G31500.1	cytochrome P450, family 83, subfamily B, polypeptide 1	scaffold_5:24344328-24346552	2.7051	5.17146	0.523082	0.508598	1
Ciclev10000887m.g	AT1G21380.1	Target of Myb protein 1	scaffold_5:38059020-38064414	53.7688	12.1201	4.43633	1.22e-07	3.48e-06
Ciclev10000889m.g	AT1G19440.1	3-ketoacyl-CoA synthase 4	scaffold_5:41081415-41083138	9.29512	3.15531	2.94587	0.112092	0.475539
Ciclev10000890m.g	AT1G10790.1		scaffold_5:9999885-10003989	2.62581	0.898265	2.9232	0.365306	0.957432
Ciclev10000891m.g	AT2G01070.1	Lung seven transmembrane receptor family protein	scaffold_5:12168883-12172755	27.4334	17.805	1.54077	0.139467	0.543768
Ciclev10000893m.g	AT5G45290.1	RING/U-box superfamily protein	scaffold_5:29125854-29130238	2.2562	3.42417	0.658904	1	1
Ciclev10000894m.g	AT1G71720.1	Nucleic acid-binding proteins superfamily	scaffold_5:39126563-39130916	15.0572	16.7251	0.900276	1	1
Ciclev10000895m.g	AT5G10610.1	cytochrome P450, family 81, subfamily K, polypeptide 1	scaffold_5:34312616-34314987	58.9182	62.8261	0.937798	0.927955	1
Ciclev10000897m.g	AT1G76040.2	calcium-dependent protein kinase 29	scaffold_5:42272202-42276387	5.0334	3.38082	1.48881	0.541376	1
Ciclev10000901m.g	AT1G33980.1	Smg-4/UPF3 family protein	scaffold_5:4461970-4470737	14.8789	10.5497	1.41036	0.43519	1
Ciclev10000902m.g	AT5G25900.1	GA requiring 3	scaffold_5:4498791-4501743	0.971018	0.897805	1.08155	1	1
Ciclev10000905m.g	AT1G75130.1	cytochrome P450, family 721, subfamily A, polypeptide 1	scaffold_5:40878422-40882623	1.77128	1.88422	0.94006	1	1
Ciclev10000906m.g	AT4G35230.1	BR-signaling kinase 1	scaffold_5:42545538-42550588	47.5581	52.2338	0.910485	0.842346	1
Ciclev10000909m.g	AT4G24250.1	Seven transmembrane MLO family protein	scaffold_5:101796-108313	0.131347	0.147655	0.889553	1	1
Ciclev10000910m.g	AT4G16580.1	Protein phosphatase 2C family protein	scaffold_5:40872792-40877775	33.2137	31.7456	1.04625	0.71307	1
Ciclev10000913m.g			scaffold_5:36638720-36641298	0.402127	0.0640796	6.27543	1	1
Ciclev10000915m.g	AT1G11870.2	Seryl-tRNA synthetase	scaffold_5:36101457-36105593	8.12555	12.5928	0.645254	0.52531	1
Ciclev10000917m.g	AT5G12890.1	UDP-Glycosyltransferase superfamily protein	scaffold_5:17461566-17463320	0.0502312	0.451093	0.111354	1	1
Ciclev10000918m.g	AT4G37370.1	cytochrome P450, family 81, subfamily D, polypeptide 8	scaffold_5:34345967-34347847	6.29945	3.11115	2.0248	0.379008	0.958688
Ciclev10000919m.g	AT4G38470.1	ACT-like protein tyrosine kinase family protein	scaffold_5:42339174-42344676	9.76745	20.1908	0.483757	0.0724869	0.355511
Ciclev10000921m.g	AT2G30490.1	cinnamate-4-hydroxylase	scaffold_5:15445700-15450041	33.7047	37.65	0.895211	0.814092	1
Ciclev10000923m.g	AT1G31910.1	GHMP kinase family protein	scaffold_5:26496114-26502834	8.14518	13.5835	0.599638	0.407046	0.992144
Ciclev10000924m.g	AT4G31500.1	cytochrome P450, family 83, subfamily B, polypeptide 1	scaffold_5:41680810-41682843	34.8626	20.6311	1.68981	0.0455233	0.252867
Ciclev10000925m.g	AT1G22360.1	UDP-glucosyl transferase 85A2	scaffold_5:36251748-36253427	6.52199	4.81406	1.35478	0.574186	1
Ciclev10000926m.g	AT4G37370.1	cytochrome P450, family 81, subfamily D, polypeptide 8	scaffold_5:34382123-34384067	0.752797	0.393177	1.91465	1	1
Ciclev10000927m.g	AT1G44110.1	Cyclin A1;1	scaffold_5:37664655-37668864	0.36011	0.115006	3.13123	1	1
Ciclev10000928m.g	AT3G02100.1	UDP-Glycosyltransferase superfamily protein	scaffold_5:25850492-25852629	8.84711	25.691	0.344366	0.006331	0.0543243
Ciclev10000930m.g	AT2G44020.1	Mitochondrial transcription termination factor family protein	scaffold_5:39613356-39615571	5.13254	5.17148	0.99247	1	1
Ciclev10000931m.g	AT1G35670.1	calcium-dependent protein kinase 2	scaffold_5:39415803-39419710	35.1482	37.539	0.936312	1	1
Ciclev10000932m.g	AT1G77360.1	Tetratricopeptide repeat (TPR)-like superfamily protein	scaffold_5:29189913-29191722	3.85232	1.05136	3.66413	0.444228	1
Ciclev10000934m.g	AT4G37370.1	cytochrome P450, family 81, subfamily D, polypeptide 8	scaffold_5:34373193-34375442	1e-05	0.0648963	0.000154092	1	1
Ciclev10000935m.g	AT2G01860.1	Tetratricopeptide repeat (TPR)-like superfamily protein	scaffold_5:42792299-42794134	8.627	10.1385	0.850915	0.824505	1
Ciclev10000938m.g	AT4G08310.1		scaffold_5:37261673-37266754	24.6262	22.9616	1.07249	0.773145	1
Ciclev10000939m.g	AT1G47840.1	hexokinase 3	scaffold_5:41895512-41898880	0.326507	0.544816	0.599298	1	1
Ciclev10000940m.g	AT4G08250.1	GRAS family transcription factor	scaffold_5:37180883-37182577	1e-05	0.164269	6.09e-05	1	1
Ciclev10000941m.g	AT1G09960.1	sucrose transporter 4	scaffold_5:35065342-35070910	12.7286	18.3686	0.692954	0.380145	0.953466
Ciclev10000944m.g	AT3G02100.1	UDP-Glycosyltransferase superfamily protein	scaffold_5:25842992-25846200	3.12913	8.26166	0.378753	0.268099	0.81193
Ciclev10000945m.g	AT4G24330.1	Protein of unknown function (DUF1682)	scaffold_5:6040244-6045626	32.7289	6.80927	4.80652	1.97e-05	0.000365393
Ciclev10000946m.g	AT1G12220.1	Disease resistance protein (CC-NBS-LRR class) family	scaffold_5:32375291-32377628	0.913542	0.32162	2.84044	1	1
Ciclev10000947m.g	AT1G47530.1	MATE efflux family protein	scaffold_5:40691800-40694522	23.9441	14.7283	1.62572	0.148766	0.56936
Ciclev10000948m.g	AT4G35090.1	catalase 2	scaffold_5:42695342-42700919	718.873	518.203	1.38724	1.69e-10	7.33e-09
Ciclev10000949m.g	AT1G44170.1	aldehyde dehydrogenase 3H1	scaffold_5:37529107-37534944	38.3357	45.4235	0.843962	0.588895	1
Ciclev10000950m.g	AT5G65380.1	MATE efflux family protein	scaffold_5:35948623-35951377	3.15165	2.9842	1.05611	0.721429	1
Ciclev10000951m.g	AT4G35090.1	catalase 2	scaffold_5:42704437-42709207	95.4254	95.3002	1.00131	0.828626	1
Ciclev10000952m.g	AT1G76710.1	SET domain group 26	scaffold_5:38941434-38946007	3.86538	6.05789	0.638074	0.549728	1
Ciclev10000954m.g	AT2G01170.1	bidirectional amino acid transporter 1	scaffold_5:37749886-37752104	1e-05	0.266796	3.75e-05	1	1
Ciclev10000955m.g	AT1G56350.1	Peptide chain release factor 2	scaffold_5:33992641-33995456	3.38667	4.3571	0.777276	1	1
Ciclev10000958m.g	AT1G22360.1	UDP-glucosyl transferase 85A2	scaffold_5:36267512-36270615	121.072	14.7813	8.19089	3.2e-23	3.54e-21
Ciclev10000960m.g	AT3G05165.4	Major facilitator superfamily protein	scaffold_5:31925317-31931330	65.5843	88.6985	0.739407	0.126625	0.514202
Ciclev10000961m.g	AT1G31830.1	Amino acid permease family protein	scaffold_5:28792154-28794473	1.27523	3.1696	0.402332	0.687874	1
Ciclev10000962m.g	AT5G63910.1	farnesylcysteine lyase	scaffold_5:16114443-16118985	31.1261	32.3447	0.962325	1	1
Ciclev10000963m.g	AT5G09300.1	Thiamin diphosphate-binding fold (THDP-binding) superfamily protein	scaffold_5:17163767-17168691	43.4694	58.702	0.74051	0.236801	0.756434
Ciclev10000964m.g	AT1G44350.1	IAA-leucine resistant (ILR)-like gene 6	scaffold_5:37473063-37478070	34.0322	10.8068	3.14915	0.000293782	0.00410024
Ciclev10000965m.g	AT5G51340.1	Tetratricopeptide repeat (TPR)-like superfamily protein	scaffold_5:14944935-14948573	15.1718	20.5884	0.73691	0.514507	1
Ciclev10000967m.g	AT4G37330.1	cytochrome P450, family 81, subfamily D, polypeptide 4	scaffold_5:39791663-39793900	1.1976	3.90998	0.306293	0.687874	1
Ciclev10000968m.g	AT3G63470.1	serine carboxypeptidase-like 40	scaffold_5:40400643-40405657	26.1537	24.6881	1.05936	0.680294	1
Ciclev10000970m.g	AT1G19860.1	Zinc finger C-x8-C-x5-C-x3-H type family protein	scaffold_5:41703786-41708779	54.3785	33.0155	1.64706	0.019197	0.130712
Ciclev10000975m.g	AT5G24750.1	UDP-Glycosyltransferase superfamily protein	scaffold_5:12122622-12130994	3.09169	4.17303	0.740874	1	1
Ciclev10000976m.g	AT2G33860.1	Transcriptional factor B3 family protein / auxin-responsive factor AUX/IAA-related	scaffold_5:6070992-6076799	1e-05	0.233608	4.28e-05	1	1
Ciclev10000978m.g	AT1G09300.1	Metallopeptidase M24 family protein	scaffold_5:34211378-34217253	28.0952	24.675	1.13861	0.499738	1
Ciclev10000979m.g	AT3G28670.1	oxidoreductase, zinc-binding dehydrogenase family protein	scaffold_5:35217312-35224160	18.1164	13.2413	1.36817	0.38508	0.96198
Ciclev10000980m.g	AT5G27350.1	Major facilitator superfamily protein	scaffold_5:31939509-31943860	22.1548	44.9637	0.492726	0.0147391	0.10587
Ciclev10000981m.g	AT5G49630.1	amino acid permease 6	scaffold_5:34994036-35002166	9.35022	5.82927	1.60401	0.324014	0.900024
Ciclev10000982m.g	AT3G50700.1	indeterminate(ID)-domain 2	scaffold_5:33217334-33221682	4.1393	5.03933	0.821399	1	1
Ciclev10000983m.g	AT5G04980.2	DNAse I-like superfamily protein	scaffold_5:24066569-24070257	1.07447	0.571447	1.88026	0.617655	1
Ciclev10000984m.g	AT1G09020.1	homolog of yeast sucrose nonfermenting 4	scaffold_5:33028396-33034775	41.0135	30.4039	1.34896	0.160433	0.600011
Ciclev10000985m.g	AT1G47330.1	CBS domain-containing protein with a domain of unknown function (DUF21)	scaffold_5:41028042-41032953	18.8449	23.6557	0.796633	0.545858	1
Ciclev10000988m.g	AT3G18970.1	mitochondrial editing factor 20	scaffold_5:29467470-29469049	1.50197	2.35574	0.637579	1	1
Ciclev10000990m.g	AT1G77360.1	Tetratricopeptide repeat (TPR)-like superfamily protein	scaffold_5:37710021-37713327	5.30428	7.72286	0.686828	0.791112	1
Ciclev10000991m.g	AT1G77380.1	amino acid permease 3	scaffold_5:37687806-37690745	39.1224	111.116	0.352086	1.31e-08	4.32e-07
Ciclev10000992m.g	AT1G76660.1		scaffold_5:43215116-43218585	1.91706	1.13532	1.68856	1	1
Ciclev10000996m.g	AT1G31830.1	Amino acid permease family protein	scaffold_5:28289811-28291569	1.9318	4.22986	0.456705	0.453779	1
Ciclev10000997m.g	AT1G34270.1	Exostosin family protein	scaffold_5:39589972-39592011	13.2788	14.3162	0.927537	1	1
Ciclev10000998m.g	AT5G42240.1	serine carboxypeptidase-like 42	scaffold_5:38363304-38367051	50.4138	35.0664	1.43767	0.0857382	0.398014
Ciclev10001000m.g	AT5G58380.1	SOS3-interacting protein 1	scaffold_5:13183492-13185654	15.8116	5.52384	2.86243	0.0318705	0.193401
Ciclev10001001m.g	AT4G08540.1	DNA-directed RNA polymerase II protein	scaffold_5:36807244-36812356	15.1874	15.0887	1.00654	1	1
Ciclev10001002m.g	AT2G33630.1	NAD(P)-binding Rossmann-fold superfamily protein	scaffold_5:42974881-42977561	13.6514	13.0146	1.04893	1	1
Ciclev10001005m.g	AT1G16570.1	UDP-Glycosyltransferase superfamily protein	scaffold_5:30736530-30740889	5.55542	4.96024	1.11999	0.770362	1
Ciclev10001007m.g	AT1G19920.1	Pseudouridine synthase/archaeosine transglycosylase-like family protein	scaffold_5:41787407-41790854	4.1815	6.44399	0.648899	0.774954	1
Ciclev10001008m.g	AT1G28210.1	DNAJ heat shock family protein	scaffold_5:35917383-35925361	9.64106	8.37218	1.15156	0.820924	1
Ciclev10001011m.g	AT3G19770.1	Vacuolar sorting protein 9 (VPS9) domain	scaffold_5:36883102-36887975	4.95218	4.91851	1.00685	1	1
Ciclev10001014m.g	AT3G54470.1	uridine 5\'-monophosphate synthase / UMP synthase (PYRE-F) (UMPS)	scaffold_5:787433-791617	53.3246	42.1592	1.26484	0.222774	0.728455
Ciclev10001015m.g	AT1G19270.1	DA1	scaffold_5:40713634-40719124	41.0456	6.20901	6.61065	1.48e-07	4.15e-06
Ciclev10001016m.g	AT5G26310.1	UDP-Glycosyltransferase superfamily protein	scaffold_5:40841687-40843369	3.48499	2.56482	1.35877	0.721429	1
Ciclev10001017m.g	AT5G66730.1	C2H2-like zinc finger protein	scaffold_5:40892737-40895876	4.23825	2.10423	2.01416	0.499686	1
Ciclev10001020m.g	AT5G20710.1	beta-galactosidase 7	scaffold_5:24748815-24753902	0.0808836	0.318889	0.253642	1	1
Ciclev10001021m.g	AT1G54990.1	alpha/beta-Hydrolases superfamily protein	scaffold_5:32967396-32970116	7.76573	13.7188	0.566065	0.288406	0.843093
Ciclev10001022m.g	AT5G46410.2	SCP1-like small phosphatase 4	scaffold_5:24019099-24024516	12.8404	12.1285	1.0587	1	1
Ciclev10001023m.g	AT1G22040.1	Galactose oxidase/kelch repeat superfamily protein	scaffold_5:36743352-36746199	30.7132	17.9754	1.70862	0.0621227	0.317217
Ciclev10001024m.g	AT5G36110.1	cytochrome P450, family 716, subfamily A, polypeptide 1	scaffold_5:17615994-17618419	0.327531	0.513934	0.637302	1	1
Ciclev10001026m.g	AT1G22040.1	Galactose oxidase/kelch repeat superfamily protein	scaffold_5:22571031-22573220	7.48067	6.67706	1.12035	0.800252	1
Ciclev10001029m.g	AT3G48090.1	alpha/beta-Hydrolases superfamily protein	scaffold_5:1102933-1104649	0.434122	0.362439	1.19778	1	1
Ciclev10001030m.g	AT1G21400.1	Thiamin diphosphate-binding fold (THDP-binding) superfamily protein	scaffold_5:38090538-38095612	8.18724	15.9956	0.511843	0.231853	0.745549
Ciclev10001031m.g	AT1G75420.1	UDP-Glycosyltransferase superfamily protein	scaffold_5:41356898-41361583	6.12789	7.08797	0.864548	1	1
Ciclev10001032m.g	AT1G54730.2	Major facilitator superfamily protein	scaffold_5:31919716-31923369	16.57	17.7614	0.932922	1	1
Ciclev10001035m.g	AT1G21900.1	emp24/gp25L/p24 family/GOLD family protein	scaffold_5:37235123-37239661	9.57734	15.6866	0.610543	0.329462	0.908509
Ciclev10001037m.g	AT2G41705.1	camphor resistance CrcB family protein	scaffold_5:37117935-37123920	35.9904	15.412	2.33522	0.00349437	0.0334375
Ciclev10001042m.g	AT3G19540.1	Protein of unknown function (DUF620)	scaffold_5:34414460-34417249	0.557341	1.65501	0.33676	1	1
Ciclev10001043m.g	AT3G19270.1	cytochrome P450, family 707, subfamily A, polypeptide 4	scaffold_5:40180739-40184016	6.9219	34.3785	0.201344	1.75e-05	0.000327773
Ciclev10001045m.g	AT5G27730.1	Protein of unknown function (DUF1624)	scaffold_5:33343273-33347744	35.8474	28.1847	1.27187	0.322724	0.897212
Ciclev10001046m.g	AT4G01880.1	methyltransferases	scaffold_5:39086782-39089703	28.4223	34.9918	0.812256	0.617592	1
Ciclev10001047m.g	AT1G32200.1	phospholipid/glycerol acyltransferase family protein	scaffold_5:26935356-26947618	33.7878	21.9636	1.53835	0.0834981	0.390896
Ciclev10001048m.g	AT4G06536.1	SPla/RYanodine receptor (SPRY) domain-containing protein	scaffold_5:39963242-39965562	20.5432	8.32749	2.46691	0.0271673	0.170361
Ciclev10001050m.g	AT1G12680.1	phosphoenolpyruvate carboxylase-related kinase 2	scaffold_5:35898988-35902917	19.1066	8.41977	2.26925	0.039809	0.228265
Ciclev10001051m.g	AT5G28770.2	bZIP transcription factor family protein	scaffold_5:29469172-29473572	15.5593	20.5892	0.755702	0.514507	1
Ciclev10001054m.g	AT1G47128.1	Granulin repeat cysteine protease family protein	scaffold_5:39909445-39913557	428.173	674.389	0.634905	1.32e-11	6.39e-10
Ciclev10001055m.g	AT5G09640.1	serine carboxypeptidase-like 19	scaffold_5:34739063-34742983	45.1243	29.3054	1.53979	0.0507626	0.274717
Ciclev10001056m.g	AT1G31360.1	RECQ helicase L2	scaffold_5:27805276-27812705	4.98548	4.4857	1.11142	1	1
Ciclev10001057m.g	AT5G49970.1	pyridoxin (pyrodoxamine) 5\'-phosphate oxidase	scaffold_5:35886980-35892772	0.155747	0.173164	0.899419	1	1
Ciclev10001058m.g	AT4G38900.2	Basic-leucine zipper (bZIP) transcription factor family protein	scaffold_5:41662679-41665662	27.1399	22.7153	1.19479	0.405215	0.9893
Ciclev10001059m.g	AT5G09640.1	serine carboxypeptidase-like 19	scaffold_5:34732987-34736843	1.04829	0.440771	2.37831	0.617655	1
Ciclev10001060m.g	AT5G09640.1	serine carboxypeptidase-like 19	scaffold_5:34751053-34754900	14.9492	13.3845	1.1169	0.853468	1
Ciclev10001062m.g	AT1G32230.3	WWE protein-protein interaction domain protein family	scaffold_5:27004513-27012050	176.788	151.965	1.16335	0.087265	0.40154
Ciclev10001063m.g	AT4G33280.1	AP2/B3-like transcriptional factor family protein	scaffold_5:40554895-40558064	1.57903	1.48855	1.06078	1	1
Ciclev10001065m.g	AT3G11340.1	UDP-Glycosyltransferase superfamily protein	scaffold_5:29825418-29827587	40.7366	24.4041	1.66925	0.0362204	0.211893
Ciclev10001068m.g	AT4G24510.1	HXXXD-type acyl-transferase family protein	scaffold_5:35538653-35541459	0.577325	1.04853	0.550604	1	1
Ciclev10001069m.g	AT2G33610.1	switch subunit 3	scaffold_5:42985832-42990116	29.3958	27.3528	1.07469	0.695607	1
Ciclev10001070m.g	AT5G42930.1	alpha/beta-Hydrolases superfamily protein	scaffold_5:40109326-40112318	1.80912	0.63097	2.8672	0.617655	1
Ciclev10001071m.g	AT3G02100.1	UDP-Glycosyltransferase superfamily protein	scaffold_5:25834125-25835646	1.07652	4.41879	0.243623	0.453779	1
Ciclev10001072m.g	AT1G77690.1	like AUX1 3	scaffold_5:37105295-37107915	0.340935	1.27416	0.267576	1	1
Ciclev10001073m.g	AT1G72100.1	late embryogenesis abundant domain-containing protein / LEA domain-containing protein	scaffold_5:39764172-39765843	1e-05	0.199227	5.02e-05	1	1
Ciclev10001075m.g	AT1G16870.1	mitochondrial 28S ribosomal protein S29-related	scaffold_5:12779470-12783622	15.7089	16.7061	0.940309	1	1
Ciclev10001076m.g	AT3G45100.1	UDP-Glycosyltransferase superfamily protein	scaffold_5:11696379-11701383	5.41317	5.11295	1.05872	1	1
Ciclev10001077m.g	AT5G60930.1	P-loop containing nucleoside triphosphate hydrolases superfamily protein	scaffold_5:35578104-35582361	0.112899	0.374436	0.301517	1	1
Ciclev10001078m.g	AT1G35470.2	SPla/RYanodine receptor (SPRY) domain-containing protein	scaffold_5:39665684-39672167	22.9662	31.1696	0.736814	0.345278	0.923062
Ciclev10001079m.g	AT5G22130.1	mannosyltransferase family protein	scaffold_5:21076262-21079526	16.8207	14.0249	1.19935	0.724721	1
Ciclev10001081m.g	AT3G12250.1	TGACG motif-binding factor 6	scaffold_5:21379383-21388939	48.6705	33.2601	1.46333	0.0785611	0.374578
Ciclev10001082m.g	AT3G26040.1	HXXXD-type acyl-transferase family protein	scaffold_5:17984020-17985454	0.274186	1e-05	27418.6	1	1
Ciclev10001084m.g	AT1G34430.1	2-oxoacid dehydrogenases acyltransferase family protein	scaffold_5:39477781-39484776	18.8788	25.662	0.735671	0.375599	0.952304
Ciclev10001085m.g	AT2G13810.1	AGD2-like defense response protein 1	scaffold_5:36770515-36774625	0.204229	1e-05	20422.9	1	1
Ciclev10001086m.g	AT3G26040.1	HXXXD-type acyl-transferase family protein	scaffold_5:18104382-18105975	3.01098	1.16419	2.58633	0.444228	1
Ciclev10001087m.g	AT1G31830.1	Amino acid permease family protein	scaffold_5:28418979-28420456	1.91174	4.26432	0.448311	0.453779	1
Ciclev10001088m.g	AT1G54820.1	Protein kinase superfamily protein	scaffold_5:32624373-32632209	0.110504	0.184304	0.599575	1	1
Ciclev10001089m.g	AT3G26040.1	HXXXD-type acyl-transferase family protein	scaffold_5:11931811-11933520	1e-05	0.0644251	0.000155219	1	1
Ciclev10001093m.g	AT5G64440.1	fatty acid amide hydrolase	scaffold_5:15605851-15610028	28.1397	39.4337	0.713595	0.278933	0.831857
Ciclev10001095m.g	AT3G02100.1	UDP-Glycosyltransferase superfamily protein	scaffold_5:25856737-25859047	2.43374	6.30534	0.385981	0.344732	0.927493
Ciclev10001096m.g	AT1G77660.1	Histone H3 K4-specific methyltransferase SET7/9 family protein	scaffold_5:37199634-37201893	3.33694	2.70753	1.23247	0.721429	1
Ciclev10001099m.g	AT1G76510.1	ARID/BRIGHT DNA-binding domain-containing protein	scaffold_5:43036918-43044008	38.4695	19.3148	1.99171	0.00905208	0.0719926
Ciclev10001100m.g	AT1G76990.1	ACT domain repeat 3	scaffold_5:38108660-38114412	55.6309	47.1459	1.17997	0.328611	0.906549
Ciclev10001103m.g	AT3G30390.1	Transmembrane amino acid transporter family protein	scaffold_5:34826870-34830732	14.1706	4.09174	3.46322	0.0242004	0.155638
Ciclev10001104m.g	AT1G21480.2	Exostosin family protein	scaffold_5:38278462-38282008	3.94203	5.18755	0.759902	0.754397	1
Ciclev10001105m.g	AT2G17900.1	SET domain group 37	scaffold_5:37066207-37070717	3.85586	4.76479	0.80924	1	1
Ciclev10001106m.g	AT3G26040.1	HXXXD-type acyl-transferase family protein	scaffold_5:42634963-42636368	4.75732	0.42068	11.3086	0.117876	0.489877
Ciclev10001108m.g	AT3G05510.1	Phospholipid/glycerol acyltransferase family protein	scaffold_5:33334756-33337976	11.0453	6.95479	1.58816	0.255311	0.795608
Ciclev10001110m.g			scaffold_5:185640-188056	5.40956	8.59233	0.62958	0.608335	1
Ciclev10001111m.g	AT3G26040.1	HXXXD-type acyl-transferase family protein	scaffold_5:17947452-17948817	0.481343	1.07345	0.448407	1	1
Ciclev10001114m.g	AT1G42970.1	glyceraldehyde-3-phosphate dehydrogenase B subunit	scaffold_5:42875802-42879044	441.067	571.106	0.772303	0.00060825	0.00772098
Ciclev10001115m.g	AT4G33490.2	Eukaryotic aspartyl protease family protein	scaffold_5:15776475-15781159	14.5118	18.9844	0.764407	0.610041	1
Ciclev10001116m.g	AT1G75430.1	BEL1-like homeodomain 11	scaffold_5:41382907-41385972	0.638857	1.2871	0.496354	1	1
Ciclev10001117m.g	AT3G42170.1	BED zinc finger ;hAT family dimerisation domain	scaffold_5:30586283-30587715	0.989767	0.511258	1.93594	1	1
Ciclev10001118m.g	AT4G31940.1	cytochrome P450, family 82, subfamily C, polypeptide 4	scaffold_5:26715484-26717938	137.019	49.7271	2.75542	1.27e-11	6.2e-10
Ciclev10001119m.g	AT2G45730.1	eukaryotic initiation factor 3 gamma subunit family protein	scaffold_5:41871238-41875409	18.3853	22.0521	0.833721	0.646756	1
Ciclev10001120m.g	AT1G78070.1	Transducin/WD40 repeat-like superfamily protein	scaffold_5:36564476-36569792	109.925	194.255	0.56588	5.56e-06	0.000117208
Ciclev10001121m.g	AT1G75400.1	RING/U-box superfamily protein	scaffold_5:41337992-41344179	26.6097	11.4289	2.32828	0.0152518	0.108625
Ciclev10001122m.g	AT4G33490.2	Eukaryotic aspartyl protease family protein	scaffold_5:15762363-15766976	17.4102	29.7448	0.585319	0.114821	0.481834
Ciclev10001124m.g	AT4G24550.2	Clathrin adaptor complexes medium subunit family protein	scaffold_5:35664486-35669446	59.9936	56.245	1.06665	0.64459	1
Ciclev10001126m.g	AT3G49180.1	Transducin/WD40 repeat-like superfamily protein	scaffold_5:40081126-40086638	12.9859	11.3332	1.14583	0.842676	1
Ciclev10001128m.g	AT3G05480.1	cell cycle checkpoint control protein family	scaffold_5:33307926-33311996	2.37636	3.45498	0.687807	1	1
Ciclev10001130m.g	AT4G29680.1	Alkaline-phosphatase-like family protein	scaffold_5:2455680-2457243	31.0233	6.68128	4.64332	3.32e-05	0.000588075
Ciclev10001131m.g	AT4G29250.1	HXXXD-type acyl-transferase family protein	scaffold_5:29666996-29670123	0.538868	0.840026	0.64149	1	1
Ciclev10001133m.g	AT5G64610.1	histone acetyltransferase of the MYST family 1	scaffold_5:36894364-36899326	36.8685	30.6413	1.20323	0.397367	0.976668
Ciclev10001136m.g	AT5G63860.1	Regulator of chromosome condensation (RCC1) family protein	scaffold_5:15966065-15975610	29.7064	27.7812	1.0693	0.695607	1
Ciclev10001138m.g	AT2G33710.2	Integrase-type DNA-binding superfamily protein	scaffold_5:38906625-38908821	9.0906	0.951018	9.55881	0.0054745	0.0488591
Ciclev10001139m.g	AT1G34340.1	alpha/beta-Hydrolases superfamily protein	scaffold_5:39518143-39523027	2.59594	2.76738	0.93805	1	1
Ciclev10001140m.g	AT1G75780.1	tubulin beta-1 chain	scaffold_5:41945345-41948270	39.3421	27.4935	1.43096	0.11526	0.483363
Ciclev10001142m.g	AT1G21200.1	sequence-specific DNA binding transcription factors	scaffold_5:38644147-38646386	14.3885	11.4345	1.25834	0.565867	1
Ciclev10001143m.g	AT5G27470.1	seryl-tRNA synthetase / serine--tRNA ligase	scaffold_5:32780338-32783349	56.325	64.1869	0.877516	0.651159	1
Ciclev10001144m.g	AT1G35620.1	PDI-like 5-2	scaffold_5:39362177-39365948	30.9044	26.4866	1.16679	0.514188	1
Ciclev10001145m.g	AT4G01950.1	glycerol-3-phosphate acyltransferase 3	scaffold_5:36785809-36787450	0.433328	1.30493	0.33207	1	1
Ciclev10001146m.g	AT4G33430.2	BRI1-associated receptor kinase	scaffold_5:22336224-22340033	160.152	52.5656	3.04671	7.49e-15	4.97e-13
Ciclev10001147m.g	AT4G24400.1	CBL-interacting protein kinase 8	scaffold_5:35232080-35237039	28.8971	30.8371	0.937089	1	1
Ciclev10001148m.g	AT1G43190.1	polypyrimidine tract-binding protein 3	scaffold_5:38869665-38875564	32.5471	28.1055	1.15803	0.527506	1
Ciclev10001149m.g	AT1G27480.1	alpha/beta-Hydrolases superfamily protein	scaffold_5:34773463-34775206	1.09108	1.84622	0.59098	1	1
Ciclev10001152m.g	AT1G27840.1	Transducin/WD40 repeat-like superfamily protein	scaffold_5:40219020-40224336	13.1688	12.0521	1.09266	0.848355	1
Ciclev10001154m.g	AT3G58970.1	magnesium transporter 6	scaffold_5:6749023-6753178	20.0501	15.9298	1.25865	0.411734	0.998666
Ciclev10001155m.g	AT2G26490.1	Transducin/WD40 repeat-like superfamily protein	scaffold_5:40597271-40598741	0.128841	0.0715479	1.80077	1	1
Ciclev10001159m.g	AT1G45249.1	abscisic acid responsive elements-binding factor 2	scaffold_5:40139284-40142825	30.9656	15.6181	1.98267	0.0275578	0.17203
Ciclev10001160m.g	AT3G26040.1	HXXXD-type acyl-transferase family protein	scaffold_5:8910946-8912566	82.2218	13.7791	5.96714	7.37e-14	4.38e-12
Ciclev10001161m.g	AT1G71980.1	Protease-associated (PA) RING/U-box zinc finger family protein	scaffold_5:39367032-39370754	50.2081	44.6619	1.12418	0.475057	1
Ciclev10001163m.g	AT1G77840.1	Translation initiation factor IF2/IF5	scaffold_5:36869386-36872829	92.5094	42.731	2.16492	6.43e-06	0.000132629
Ciclev10001165m.g	AT1G47870.1	winged-helix DNA-binding transcription factor family protein	scaffold_5:41865373-41869493	1.38147	1.144	1.20758	1	1
Ciclev10001166m.g	AT2G16980.2	Major facilitator superfamily protein	scaffold_5:42314433-42319779	7.08763	9.54582	0.742485	0.815194	1
Ciclev10001167m.g	AT5G27660.1	Trypsin family protein with PDZ domain	scaffold_5:33252170-33255796	3.08506	3.60275	0.856307	1	1
Ciclev10001170m.g	AT1G22100.1	Inositol-pentakisphosphate 2-kinase family protein	scaffold_5:41242935-41246768	6.40187	8.2965	0.771635	0.804245	1
Ciclev10001173m.g	AT1G48880.1	TRICHOME BIREFRINGENCE-LIKE 7	scaffold_5:18398112-18402314	4.12594	3.1385	1.31462	0.749386	1
Ciclev10001174m.g	AT3G12350.1	F-box family protein	scaffold_5:34674636-34676788	10.2889	7.25657	1.41787	0.496375	1
Ciclev10001177m.g	AT1G76360.1	Protein kinase superfamily protein	scaffold_5:42755250-42758065	1.94477	0.927929	2.09582	0.617655	1
Ciclev10001178m.g	AT1G09850.1	xylem bark cysteine peptidase 3	scaffold_5:41443666-41446709	13.5961	24.317	0.559119	0.110865	0.471884
Ciclev10001179m.g	AT5G25900.1	GA requiring 3	scaffold_5:4550038-4553132	1.73177	2.43604	0.710896	1	1
Ciclev10001180m.g	AT1G31360.1	RECQ helicase L2	scaffold_5:13903638-13915539	1.84676	2.58182	0.715294	1	1
Ciclev10001181m.g	AT1G27760.3	interferon-related developmental regulator family protein / IFRD protein family	scaffold_5:34586509-34591686	36.0464	28.8186	1.2508	0.26932	0.81283
Ciclev10001182m.g	AT1G76250.1		scaffold_5:42582877-42585184	8.20735	3.88702	2.11148	0.171891	0.626171
Ciclev10001183m.g	AT1G31830.1	Amino acid permease family protein	scaffold_5:28738203-28740972	0.0507227	0.0565844	0.896408	1	1
Ciclev10001184m.g	AT4G33470.1	histone deacetylase 14	scaffold_5:17122443-17129244	33.1945	43.8504	0.756994	0.366031	0.94136
Ciclev10001185m.g	AT5G62030.1	diphthamide synthesis DPH2 family protein	scaffold_5:22686599-22688174	25.8831	15.7728	1.641	0.121826	0.499749
Ciclev10001186m.g	AT5G64090.1		scaffold_5:13036882-13040255	3.31558	3.06608	1.08137	1	1
Ciclev10001187m.g	AT1G60420.1	DC1 domain-containing protein	scaffold_5:42265152-42269676	8.50771	10.7408	0.792093	0.824505	1
Ciclev10001190m.g	AT1G34150.1	Pseudouridine synthase family protein	scaffold_5:39194419-39200052	2.0739	4.5782	0.452995	0.726999	1
Ciclev10001191m.g	AT2G30360.1	SOS3-interacting protein 4	scaffold_5:13273930-13275652	106.183	48.0089	2.21174	1.14e-06	2.72e-05
Ciclev10001192m.g	AT5G42690.1	Protein of unknown function, DUF547	scaffold_5:40417768-40420771	6.33112	14.8877	0.425258	0.135504	0.540952
Ciclev10001194m.g	AT1G77490.1	thylakoidal ascorbate peroxidase	scaffold_5:37517042-37521275	97.1392	105.007	0.925074	0.833658	1
Ciclev10001195m.g	AT1G69740.1	Aldolase superfamily protein	scaffold_5:37478178-37482337	42.1548	36.9184	1.14184	0.434358	1
Ciclev10001196m.g	AT5G64970.1	Mitochondrial substrate carrier family protein	scaffold_5:36409789-36413418	5.05187	5.5187	0.915409	1	1
Ciclev10001198m.g	AT1G78560.1	Sodium Bile acid symporter family	scaffold_5:5972891-5976639	16.4787	17.0893	0.96427	1	1
Ciclev10001200m.g	AT5G09330.1	NAC domain containing protein 82	scaffold_5:18169661-18173979	74.487	42.601	1.74848	0.00166492	0.0180456
Ciclev10001202m.g	AT1G77670.1	Pyridoxal phosphate (PLP)-dependent transferases superfamily protein	scaffold_5:37189652-37192231	140.37	110.705	1.26796	0.0275171	0.171831
Ciclev10001203m.g	AT5G63970.1	Copine (Calcium-dependent phospholipid-binding protein) family	scaffold_5:16526796-16532892	38.7493	40.1228	0.965768	1	1
Ciclev10001207m.g	AT5G64020.1	TRICHOME BIREFRINGENCE-LIKE 14	scaffold_5:16649434-16653004	0.68942	0.708105	0.973613	1	1
Ciclev10001211m.g	AT4G08320.1	Tetratricopeptide repeat (TPR)-like superfamily protein	scaffold_5:37344548-37349705	18.5249	17.9253	1.03345	0.869783	1
Ciclev10001212m.g	AT5G07030.1	Eukaryotic aspartyl protease family protein	scaffold_5:21522432-21525218	0.533297	1.03848	0.513536	1	1
Ciclev10001213m.g	AT1G08980.1	amidase 1	scaffold_5:32755163-32758320	8.53584	15.0712	0.566368	0.231853	0.745549
Ciclev10001214m.g	AT1G47490.2	RNA-binding protein 47C	scaffold_5:40383849-40388296	209.857	132.162	1.58788	6.67e-06	0.000137581
Ciclev10001215m.g	AT1G08820.1	vamp/synaptobrevin-associated protein 27-2	scaffold_5:31084374-31089683	22.311	16.9814	1.31385	0.343018	0.924296
Ciclev10001219m.g	AT5G39960.1	GTP binding;GTP binding	scaffold_5:371943-377068	13.5159	14.4741	0.933799	1	1
Ciclev10001220m.g	AT2G23390.1		scaffold_5:2039384-2044991	37.4213	68.6497	0.545105	0.0065078	0.0555459
Ciclev10001223m.g	AT1G13570.1	F-box/RNI-like superfamily protein	scaffold_5:40702394-40706121	33.7692	26.758	1.26202	0.307893	0.869847
Ciclev10001225m.g	AT4G31980.1		scaffold_5:25722021-25731001	2.37242	2.17766	1.08944	1	1
Ciclev10001227m.g	AT3G05545.1	RING/U-box superfamily protein	scaffold_5:33385403-33390936	90.6291	37.9151	2.39032	8.99e-07	2.19e-05
Ciclev10001229m.g	AT3G05210.1	nucleotide repair protein, putative	scaffold_5:32546088-32549955	15.2609	11.9915	1.27264	0.451671	1
Ciclev10001231m.g	AT1G42430.1		scaffold_5:42595067-42600153	6.94792	4.22467	1.64461	0.574186	1
Ciclev10001232m.g	AT1G47380.1	Protein phosphatase 2C family protein	scaffold_5:40268947-40273949	198.236	80.8681	2.45135	8.05e-14	4.76e-12
Ciclev10001235m.g	AT1G76310.1	CYCLIN B2;4	scaffold_5:42675741-42682366	0.703494	0.670791	1.04875	1	1
Ciclev10001239m.g	AT1G08980.1	amidase 1	scaffold_5:32737146-32740322	31.8898	40.7193	0.783162	0.413421	0.999874
Ciclev10001246m.g	AT1G43580.1	Sphingomyelin synthetase family protein	scaffold_5:38766602-38769204	4.65574	5.6704	0.82106	1	1
Ciclev10001247m.g	AT1G10720.1	BSD domain-containing protein	scaffold_5:34778784-34781315	9.38684	3.6859	2.54669	0.112092	0.475539
Ciclev10001248m.g	AT1G09160.1	Protein phosphatase 2C family protein	scaffold_5:33825678-33829181	11.3694	13.3388	0.852356	0.845821	1
Ciclev10001249m.g	AT1G10120.1	basic helix-loop-helix (bHLH) DNA-binding superfamily protein	scaffold_5:34809344-34813138	7.49837	5.76318	1.30108	0.600877	1
Ciclev10001250m.g	AT1G35830.1	VQ motif-containing protein	scaffold_5:36490751-36492636	2.39269	0.632995	3.77995	0.365306	0.957432
Ciclev10001251m.g	AT1G76900.1	tubby like protein 1	scaffold_5:38695624-38699629	27.5812	13.9888	1.97166	0.0295387	0.182338
Ciclev10001254m.g	AT1G19360.1	Nucleotide-diphospho-sugar transferase family protein	scaffold_5:40869559-40872161	21.0272	13.1785	1.59557	0.182012	0.6478
Ciclev10001255m.g	AT1G75710.1	C2H2-like zinc finger protein	scaffold_5:41881296-41883386	0.197418	0.145012	1.36139	1	1
Ciclev10001261m.g	AT1G25280.1	tubby like protein 10	scaffold_5:19027226-19031325	55.4919	33.7745	1.64301	0.0148706	0.106617
Ciclev10001262m.g	AT5G66460.1	Glycosyl hydrolase superfamily protein	scaffold_5:41201214-41208112	4.37631	6.94359	0.630266	0.774954	1
Ciclev10001263m.g	AT5G27350.1	Major facilitator superfamily protein	scaffold_5:31933292-31936447	3.41336	6.69875	0.509552	0.549728	1
Ciclev10001264m.g	AT1G10150.1	Carbohydrate-binding protein	scaffold_5:34784367-34786120	17.3224	13.3599	1.2966	0.480826	1
Ciclev10001266m.g	AT4G25000.1	alpha-amylase-like	scaffold_5:40192463-40194246	4.65952	7.61108	0.612202	0.582057	1
Ciclev10001267m.g	AT5G64430.1	Octicosapeptide/Phox/Bem1p family protein	scaffold_5:35225857-35227630	49.2973	26.3035	1.87417	0.00593982	0.051958
Ciclev10001268m.g	AT1G36320.1		scaffold_5:36798448-36801707	29.7725	33.4694	0.889544	0.802919	1
Ciclev10001269m.g	AT3G05530.1	regulatory particle triple-A ATPase 5A	scaffold_5:33377661-33380733	25.3696	27.8932	0.909526	1	1
Ciclev10001270m.g	AT1G60990.1	Glycine cleavage T-protein family	scaffold_5:9214675-9219238	19.4923	31.5486	0.61785	0.164815	0.612378
Ciclev10001272m.g	AT3G05530.1	regulatory particle triple-A ATPase 5A	scaffold_5:33351542-33354758	63.2353	62.0756	1.01868	0.790312	1
Ciclev10001273m.g	AT1G60680.1	NAD(P)-linked oxidoreductase superfamily protein	scaffold_5:29632952-29636062	26.9704	49.9829	0.539593	0.0163084	0.114841
Ciclev10001274m.g	AT5G10330.1	histidinol phosphate aminotransferase 1	scaffold_5:39459444-39464982	24.4786	26.2722	0.93173	1	1
Ciclev10001275m.g	AT1G47270.1	tubby like protein 6	scaffold_5:41140492-41143801	51.5506	31.6435	1.62911	0.0214419	0.142002
Ciclev10001277m.g	AT1G09840.1	shaggy-like protein kinase 41	scaffold_5:4607325-4613461	21.3293	37.1042	0.574849	0.0698378	0.346557
Ciclev10001278m.g	AT1G71990.1	fucosyltransferase 13	scaffold_5:39349613-39352321	43.3187	31.8935	1.35823	0.135879	0.540999
Ciclev10001283m.g	AT1G48880.1	TRICHOME BIREFRINGENCE-LIKE 7	scaffold_5:38352720-38355754	3.52023	6.33336	0.555823	0.549728	1
Ciclev10001285m.g	AT5G50020.2	DHHC-type zinc finger family protein	scaffold_5:38930336-38936779	17.39	14.6876	1.18399	0.602697	1
Ciclev10001288m.g	AT2G30530.1		scaffold_5:15023462-15026939	19.3943	13.1472	1.47517	0.30402	0.861546
Ciclev10001289m.g	AT2G31290.1	Ubiquitin carboxyl-terminal hydrolase family protein	scaffold_5:38607425-38609135	8.00821	5.56216	1.43977	0.446636	1
Ciclev10001290m.g	AT1G45976.1	S-ribonuclease binding protein 1	scaffold_5:40060072-40063681	10.913	12.3705	0.882179	0.83959	1
Ciclev10001291m.g	AT1G27660.1	basic helix-loop-helix (bHLH) DNA-binding superfamily protein	scaffold_5:41275200-41278829	0.396942	0.759295	0.522777	1	1
Ciclev10001292m.g	AT1G32240.1	Homeodomain-like superfamily protein	scaffold_5:27065812-27070133	1.7198	2.54124	0.676756	1	1
Ciclev10001293m.g	AT1G10780.1	F-box/RNI-like superfamily protein	scaffold_5:9983418-9985631	0.691659	0.970945	0.712357	1	1
Ciclev10001295m.g	AT3G07300.1	NagB/RpiA/CoA transferase-like superfamily protein	scaffold_5:792246-800377	57.9263	77.8439	0.744134	0.145314	0.560357
Ciclev10001297m.g	AT3G27230.1	S-adenosyl-L-methionine-dependent methyltransferases superfamily protein	scaffold_5:41719098-41720940	2.80472	14.0708	0.199329	0.00774328	0.0638936
Ciclev10001298m.g	AT1G56340.2	calreticulin 1a	scaffold_5:33980142-33983575	106.976	99.8719	1.07113	0.445273	1
Ciclev10001299m.g	AT4G21390.1	S-locus lectin protein kinase family protein	scaffold_5:30901446-30903844	15.2865	12.6204	1.21125	0.579234	1
Ciclev10001303m.g	AT5G52010.1	C2H2-like zinc finger protein	scaffold_5:39967383-39969998	2.76697	1.77661	1.55744	0.681506	1
Ciclev10001304m.g	AT3G21110.1	purin 7	scaffold_5:35908180-35912917	23.8004	20.8511	1.14145	0.655171	1
Ciclev10001305m.g	AT1G11320.1		scaffold_5:42183489-42186821	8.1569	11.4984	0.709394	0.664964	1
Ciclev10001308m.g	AT1G56600.1	galactinol synthase 2	scaffold_5:34257704-34260311	1.70305	1.34195	1.26909	1	1
Ciclev10001309m.g	AT1G56590.1	Clathrin adaptor complexes medium subunit family protein	scaffold_5:34239480-34244107	5.66256	6.57484	0.861247	1	1
Ciclev10001310m.g	AT1G21880.2	lysm domain GPI-anchored protein 1 precursor	scaffold_5:37275152-37277867	1.20072	1.72859	0.694624	1	1
Ciclev10001314m.g	AT1G65930.1	cytosolic NADP+-dependent isocitrate dehydrogenase	scaffold_5:20894676-20899217	218.246	203.121	1.07446	0.263406	0.804007
Ciclev10001315m.g	AT1G33270.2	Acyl transferase/acyl hydrolase/lysophospholipase superfamily protein	scaffold_5:11394533-11398432	12.5749	15.5607	0.808119	0.712681	1
Ciclev10001318m.g	AT1G09700.1	dsRNA-binding domain-like superfamily protein	scaffold_5:35521571-35526568	21.8983	14.0948	1.55364	0.249796	0.781567
Ciclev10001322m.g	AT5G42760.1	Leucine carboxyl methyltransferase	scaffold_5:41035559-41037824	3.19023	4.66914	0.683259	1	1
Ciclev10001325m.g	AT1G20925.1	Auxin efflux carrier family protein	scaffold_5:43048046-43051036	443.647	100.714	4.40502	1.62e-55	5.23e-53
Ciclev10001326m.g	AT5G07900.1	Mitochondrial transcription termination factor family protein	scaffold_5:29379202-29381494	1.9252	3.756	0.512567	0.687874	1
Ciclev10001327m.g	AT1G21750.1	PDI-like 1-1	scaffold_5:37494368-37498693	61.1109	126.085	0.48468	7.79e-06	0.000157732
Ciclev10001330m.g	AT1G21080.1	DNAJ heat shock N-terminal domain-containing protein	scaffold_5:43282463-43287999	132.882	88.5241	1.50108	0.00123258	0.0140602
Ciclev10001331m.g	AT3G12400.1	Ubiquitin-conjugating enzyme/RWD-like protein	scaffold_5:20091692-20093357	17.6106	4.17282	4.22031	0.00579066	0.0510919
Ciclev10001332m.g	AT2G26530.1	Protein of unknown function (DUF1645)	scaffold_5:40427855-40429578	94.8009	124.998	0.758419	0.0916924	0.416662
Ciclev10001333m.g	AT2G35530.1	basic region/leucine zipper transcription factor 16	scaffold_5:26545479-26551827	24.2898	22.3386	1.08735	0.773145	1
Ciclev10001334m.g	AT4G24160.1	alpha/beta-Hydrolases superfamily protein	scaffold_5:41609583-41613450	64.5982	42.119	1.53371	0.0208962	0.139294
Ciclev10001335m.g	AT5G07050.1	nodulin MtN21 /EamA-like transporter family protein	scaffold_5:20599440-20601673	14.057	2.56876	5.47229	0.00380067	0.0357847
Ciclev10001336m.g	AT1G32190.1	alpha/beta-Hydrolases superfamily protein	scaffold_5:26913090-26919381	2.34902	3.64497	0.644455	1	1
Ciclev10001337m.g	AT2G26560.1	phospholipase A 2A	scaffold_5:40327363-40329591	365.34	280.84	1.30088	0.000132492	0.00200217
Ciclev10001338m.g	AT1G15200.1	protein-protein interaction regulator family protein	scaffold_5:19604826-19609695	41.2904	41.8922	0.985635	0.913228	1
Ciclev10001340m.g	AT1G10040.1	alpha/beta-Hydrolases superfamily protein	scaffold_5:34936852-34940733	65.7848	16.4653	3.99536	1.48e-08	4.85e-07
Ciclev10001341m.g	AT1G72200.1	RING/U-box superfamily protein	scaffold_5:35989375-35991063	17.0855	6.17103	2.76866	0.0265541	0.167547
Ciclev10001344m.g	AT1G32060.1	phosphoribulokinase	scaffold_5:25876760-25880898	127.632	146.049	0.873898	0.433219	1
Ciclev10001346m.g	AT2G02450.2	NAC domain containing protein 35	scaffold_5:347068-349282	8.76462	5.79231	1.51315	0.446636	1
Ciclev10001347m.g	AT4G18530.1	Protein of unknown function (DUF707)	scaffold_5:2077316-2081952	156.814	90.4897	1.73295	7.64e-06	0.000155572
Ciclev10001348m.g	AT1G76130.1	alpha-amylase-like 2	scaffold_5:42390615-42395712	77.7747	107.06	0.726459	0.0565782	0.298512
Ciclev10001352m.g	AT3G45900.1	Ribonuclease P protein subunit P38-related	scaffold_5:27585412-27589480	30.2619	41.6495	0.726585	0.292746	0.848096
Ciclev10001354m.g	AT2G13650.1	golgi nucleotide sugar transporter 1	scaffold_5:17881810-17890203	27.7869	35.7887	0.776415	0.453731	1
Ciclev10001355m.g	AT2G04940.1	scramblase-related	scaffold_5:39754437-39762057	9.99057	13.599	0.734655	0.543212	1
Ciclev10001356m.g	AT5G09230.7	sirtuin 2	scaffold_5:16030839-16037006	13.5108	18.5943	0.72661	0.489734	1
Ciclev10001357m.g	AT4G20020.1		scaffold_5:6777321-6783205	21.6538	17.7281	1.22144	0.527717	1
Ciclev10001358m.g	AT1G20870.1	HSP20-like chaperones superfamily protein	scaffold_5:42968200-42970829	0.0837437	0.18741	0.446848	1	1
Ciclev10001360m.g	AT1G19340.1	Methyltransferase MT-A70 family protein	scaffold_5:40827747-40830709	4.48592	8.00987	0.560049	0.425266	1
Ciclev10001364m.g	AT1G77810.2	Galactosyltransferase family protein	scaffold_5:36878965-36882315	291.896	243.886	1.19685	0.0121397	0.0904543
Ciclev10001370m.g	AT4G24220.1	NAD(P)-binding Rossmann-fold superfamily protein	scaffold_5:34462922-34464693	32.4561	23.3539	1.38975	0.187554	0.661084
Ciclev10001371m.g	AT4G19420.1	Pectinacetylesterase family protein	scaffold_5:29050806-29055948	70.564	130.584	0.540372	7.61e-05	0.00122744
Ciclev10001373m.g	AT5G13750.1	zinc induced facilitator-like 1	scaffold_5:19652838-19660511	41.8854	16.9907	2.4652	0.000636541	0.0080066
Ciclev10001374m.g	AT4G24220.1	NAD(P)-binding Rossmann-fold superfamily protein	scaffold_5:30879493-30881250	20.0616	10.0247	2.00122	0.0759929	0.366668
Ciclev10001376m.g	AT4G14770.1	TESMIN/TSO1-like CXC 2	scaffold_5:29867748-29870487	0.708885	0.42227	1.67875	1	1
Ciclev10001378m.g	AT5G28040.1	DNA-binding storekeeper protein-related transcriptional regulator	scaffold_5:30639422-30641265	55.3289	13.4841	4.10327	1.19e-07	3.4e-06
Ciclev10001380m.g	AT3G18710.1	plant U-box 29	scaffold_5:38491114-38492945	128.483	119.368	1.07636	0.409944	0.995572
Ciclev10001382m.g	AT1G77120.1	alcohol dehydrogenase 1	scaffold_5:38339052-38344772	101.334	62.6658	1.61705	0.00103377	0.0121356
Ciclev10001383m.g	AT5G27450.1	mevalonate kinase	scaffold_5:32759552-32763763	7.61255	14.7273	0.516901	0.212137	0.711336
Ciclev10001384m.g	AT1G45000.1	AAA-type ATPase family protein	scaffold_5:41352237-41355326	85.1365	60.9399	1.39706	0.0255816	0.162577
Ciclev10001386m.g	AT5G42970.1	Proteasome component (PCI) domain protein	scaffold_5:40912317-40916781	21.6987	33.6542	0.644755	0.180914	0.644129
Ciclev10001388m.g	AT4G24220.1	NAD(P)-binding Rossmann-fold superfamily protein	scaffold_5:30956192-30957967	2.76523	2.23762	1.23579	1	1
Ciclev10001389m.g	AT1G33060.2	NAC 014	scaffold_5:40818937-40822881	68.6945	115.631	0.594084	0.00151587	0.0167682
Ciclev10001390m.g	AT1G54520.1		scaffold_5:30572950-30577888	17.7376	32.9931	0.537615	0.0675865	0.338597
Ciclev10001393m.g	AT4G24220.1	NAD(P)-binding Rossmann-fold superfamily protein	scaffold_5:30931924-30933298	7.36056	2.32321	3.16827	0.138749	0.546024
Ciclev10001394m.g	AT1G57680.1		scaffold_5:2465538-2469155	212.794	98.0156	2.17102	8.88e-12	4.38e-10
Ciclev10001396m.g	AT1G80950.1	Phospholipid/glycerol acyltransferase family protein	scaffold_5:40850791-40856282	7.96411	8.22767	0.967967	1	1
Ciclev10001397m.g	AT1G27600.1	Nucleotide-diphospho-sugar transferases superfamily protein	scaffold_5:35089436-35093078	21.8387	12.4653	1.75196	0.127399	0.517021
Ciclev10001398m.g	AT2G18950.1	homogentisate phytyltransferase 1	scaffold_5:9330187-9333235	1462.52	842.646	1.73563	3.64e-44	8.91e-42
Ciclev10001399m.g	AT1G22440.1	Zinc-binding alcohol dehydrogenase family protein	scaffold_5:36112286-36116407	71.353	66.1145	1.07923	0.552807	1
Ciclev10001400m.g	AT5G42520.1	basic pentacysteine 6	scaffold_5:41657488-41660413	14.4331	17.3945	0.829751	0.730062	1
Ciclev10001401m.g	AT2G02450.2	NAC domain containing protein 35	scaffold_5:354415-357611	4.44247	4.67153	0.950967	1	1
Ciclev10001403m.g	AT1G76420.1	NAC (No Apical Meristem) domain transcriptional regulator superfamily protein	scaffold_5:42943641-42945230	0.539389	0.688548	0.783372	1	1
Ciclev10001405m.g	AT5G13930.1	Chalcone and stilbene synthase family protein	scaffold_5:37169956-37171699	25.4276	12.3338	2.06162	0.036082	0.211339
Ciclev10001406m.g	AT1G49780.1	plant U-box 26	scaffold_5:17543856-17545059	0.744156	0.622565	1.19531	1	1
Ciclev10001407m.g	AT1G36310.1	S-adenosyl-L-methionine-dependent methyltransferases superfamily protein	scaffold_5:36777391-36780420	12.3449	13.3951	0.921598	1	1
Ciclev10001408m.g	AT1G77860.1	Rhomboid-related intramembrane serine protease family protein	scaffold_5:36833742-36837131	0.369509	1e-05	36950.9	1	1
Ciclev10001409m.g	AT1G19600.1	pfkB-like carbohydrate kinase family protein	scaffold_5:41173950-41177458	16.3386	14.3233	1.1407	0.724721	1
Ciclev10001411m.g	AT1G59520.1	CW7	scaffold_5:35702667-35709316	10.6863	13.9442	0.766362	0.691519	1
Ciclev10001412m.g	AT4G24220.1	NAD(P)-binding Rossmann-fold superfamily protein	scaffold_5:23972062-23973828	1.12847	2.34122	0.482001	1	1
Ciclev10001414m.g	AT4G24220.1	NAD(P)-binding Rossmann-fold superfamily protein	scaffold_5:23484138-23485588	0.0606688	0.269971	0.224723	1	1
Ciclev10001415m.g	AT3G02630.1	Plant stearoyl-acyl-carrier-protein desaturase family protein	scaffold_5:34289885-34293193	6.15683	8.69417	0.708156	0.804245	1
Ciclev10001416m.g	AT4G34160.1	CYCLIN D3;1	scaffold_5:39875927-39877965	0.950288	1.05837	0.897879	1	1
Ciclev10001417m.g	AT4G08940.1	Ubiquitin carboxyl-terminal hydrolase family protein	scaffold_5:36324041-36326387	2.81624	1.30869	2.15195	0.681506	1
Ciclev10001418m.g	AT3G04970.1	DHHC-type zinc finger family protein	scaffold_5:32320181-32324171	21.0201	18.4361	1.14016	0.639999	1
Ciclev10001419m.g	AT1G10280.1	Core-2/I-branching beta-1,6-N-acetylglucosaminyltransferase family protein	scaffold_5:2069219-2072819	2.95181	7.32258	0.403111	0.227591	0.739088
Ciclev10001420m.g	AT4G24220.1	NAD(P)-binding Rossmann-fold superfamily protein	scaffold_5:23886542-23889813	1.85688	2.42399	0.766043	1	1
Ciclev10001421m.g			scaffold_5:13886632-13892195	3.61128	4.69168	0.76972	1	1
Ciclev10001422m.g	AT4G24220.2	NAD(P)-binding Rossmann-fold superfamily protein	scaffold_5:23986984-23992055	1.15877	2.45659	0.471699	1	1
Ciclev10001423m.g			scaffold_5:36058140-36063798	15.3081	9.21619	1.661	0.240684	0.762672
Ciclev10001424m.g	AT1G31500.1	DNAse I-like superfamily protein	scaffold_5:29033626-29037975	7.11064	7.80204	0.911382	1	1
Ciclev10001426m.g	AT4G19420.1	Pectinacetylesterase family protein	scaffold_5:29072428-29075604	94.0225	33.9941	2.76585	1.55e-08	5.06e-07
Ciclev10001427m.g	AT3G54360.1	zinc ion binding	scaffold_5:23710056-23715863	151.288	229.629	0.658837	0.000330003	0.0045403
Ciclev10001428m.g	AT4G24320.1	Ubiquitin carboxyl-terminal hydrolase family protein	scaffold_5:5993469-5995467	4.45853	2.71911	1.6397	0.499686	1
Ciclev10001429m.g	AT1G10070.1	branched-chain amino acid transaminase 2	scaffold_5:34891099-34894176	465.436	246.552	1.88778	1.77e-18	1.51e-16
Ciclev10001432m.g	AT4G36090.3	oxidoreductase, 2OG-Fe(II) oxygenase family protein	scaffold_5:9941408-9943881	3.15401	4.23188	0.745298	1	1
Ciclev10001434m.g	AT1G47710.1	Serine protease inhibitor (SERPIN) family protein	scaffold_5:40508146-40511842	46.8713	40.9842	1.14364	0.455764	1
Ciclev10001435m.g	AT3G26430.1	GDSL-like Lipase/Acylhydrolase superfamily protein	scaffold_5:37388292-37391250	15.6224	13.962	1.11892	0.716278	1
Ciclev10001436m.g	AT1G18740.1	Protein of unknown function (DUF793)	scaffold_5:19117554-19119789	13.226	14.2315	0.929347	1	1
Ciclev10001437m.g	AT5G42130.1	Mitochondrial substrate carrier family protein	scaffold_5:38489256-38490776	11.7823	15.0399	0.783403	0.573754	1
Ciclev10001438m.g	AT1G75500.1	Walls Are Thin 1	scaffold_5:41479362-41481770	0.76145	1.063	0.716322	1	1
Ciclev10001440m.g	AT1G18740.1	Protein of unknown function (DUF793)	scaffold_5:38719566-38721176	46.6773	77.0765	0.605597	0.0120169	0.0896777
Ciclev10001445m.g	AT4G24220.1	NAD(P)-binding Rossmann-fold superfamily protein	scaffold_5:34453873-34455426	0.988036	0.365872	2.7005	1	1
Ciclev10001446m.g	AT1G22440.1	Zinc-binding alcohol dehydrogenase family protein	scaffold_5:36155361-36158452	8.79212	11.2328	0.782718	0.664964	1
Ciclev10001449m.g	AT5G07900.1	Mitochondrial transcription termination factor family protein	scaffold_5:36510764-36512399	4.46243	2.41742	1.84595	0.499686	1
Ciclev10001450m.g	AT1G20925.1	Auxin efflux carrier family protein	scaffold_5:17058859-17070837	0.248274	0.559776	0.443524	1	1
Ciclev10001451m.g	AT1G60060.1	Serine/threonine-protein kinase WNK (With No Lysine)-related	scaffold_5:39905513-39907734	9.46284	10.9647	0.863028	1	1
Ciclev10001453m.g	AT1G61580.1	R-protein L3 B	scaffold_5:5103989-5106917	55.2334	45.3659	1.21751	0.236567	0.757061
Ciclev10001454m.g	AT1G61580.1	R-protein L3 B	scaffold_5:38852546-38855263	114.972	138.096	0.832551	0.258546	0.792923
Ciclev10001456m.g	AT3G02630.1	Plant stearoyl-acyl-carrier-protein desaturase family protein	scaffold_5:19762224-19764906	0.129188	0.21609	0.597843	1	1
Ciclev10001457m.g	AT5G42250.1	Zinc-binding alcohol dehydrogenase family protein	scaffold_5:42474627-42478305	160.205	292.354	0.547983	6.44e-09	2.25e-07
Ciclev10001458m.g	AT2G35500.1	shikimate kinase like 2	scaffold_5:27012428-27017627	13.0257	17.9781	0.724532	0.598974	1
Ciclev10001459m.g	AT3G02630.1	Plant stearoyl-acyl-carrier-protein desaturase family protein	scaffold_5:34284004-34286922	0.159575	0.133045	1.19941	1	1
Ciclev10001460m.g	AT4G08300.1	nodulin MtN21 /EamA-like transporter family protein	scaffold_5:37254881-37257398	1.11636	2.79985	0.398721	1	1
Ciclev10001461m.g	AT1G31350.1	KAR-UP F-box 1	scaffold_5:27819067-27820508	2.73259	1.05486	2.59048	0.681506	1
Ciclev10001463m.g	AT5G63980.1	Inositol monophosphatase family protein	scaffold_5:17168718-17173839	53.2671	84.539	0.630089	0.0174443	0.120603
Ciclev10001464m.g	AT1G33520.1	D111/G-patch domain-containing protein	scaffold_5:27602513-27607801	6.45336	2.17258	2.97037	0.218039	0.723111
Ciclev10001467m.g	AT4G19420.1	Pectinacetylesterase family protein	scaffold_5:29056983-29060046	17.1783	8.07346	2.12775	0.0825044	0.388688
Ciclev10001468m.g	AT4G19006.1	Proteasome component (PCI) domain protein	scaffold_5:26175747-26181708	62.7634	77.5	0.80985	0.313278	0.880819
Ciclev10001469m.g	AT2G30350.2	Excinuclease ABC, C subunit, N-terminal	scaffold_5:13187677-13190472	8.71021	11.0782	0.786248	0.664964	1
Ciclev10001476m.g	AT2G33700.1	Protein phosphatase 2C family protein	scaffold_5:42853522-42856666	14.679	15.0613	0.974617	1	1
Ciclev10001478m.g	AT3G05200.1	RING/U-box superfamily protein	scaffold_5:32542379-32543973	49.508	58.252	0.849894	0.565675	1
Ciclev10001479m.g	AT5G65670.2	indole-3-acetic acid inducible 9	scaffold_5:35159689-35164384	34.4794	40.7699	0.845707	0.647195	1
Ciclev10001480m.g	AT5G27690.1	Heavy metal transport/detoxification superfamily protein	scaffold_5:33293771-33295895	2.0492	1.35635	1.51082	0.681506	1
Ciclev10001481m.g	AT1G53710.1	Calcineurin-like metallo-phosphoesterase superfamily protein	scaffold_5:36028654-36031153	1.15853	1.28962	0.89835	1	1
Ciclev10001485m.g	AT1G21690.1	ATPase family associated with various cellular activities (AAA)	scaffold_5:37652360-37656378	8.59039	8.46288	1.01507	1	1
Ciclev10001487m.g	AT4G08960.1	phosphotyrosyl phosphatase activator (PTPA) family protein	scaffold_5:36215841-36219128	26.415	12.4891	2.11504	0.025649	0.162845
Ciclev10001488m.g	AT4G37680.1	heptahelical protein 4	scaffold_5:34695462-34698892	48.458	17.5609	2.75943	7.24e-05	0.00117853
Ciclev10001489m.g	AT2G40650.1	PRP38 family protein	scaffold_5:33805345-33808164	47.3704	14.2792	3.31744	1.26e-05	0.000243271
Ciclev10001491m.g	AT1G09800.1	Pseudouridine synthase family protein	scaffold_5:5317018-5321025	5.52437	7.2425	0.762771	0.791112	1
Ciclev10001493m.g	AT1G75020.1	lysophosphatidyl acyltransferase 4	scaffold_5:40745800-40749765	37.436	29.5848	1.26538	0.276271	0.826722
Ciclev10001494m.g	AT1G09340.1	chloroplast RNA binding	scaffold_5:34251120-34255285	233.289	296.661	0.786382	0.0239347	0.15434
Ciclev10001495m.g	AT1G21790.1	TRAM, LAG1 and CLN8 (TLC) lipid-sensing domain containing protein	scaffold_5:37413098-37417182	2.4489	2.44087	1.00329	1	1
Ciclev10001496m.g	AT5G42470.1		scaffold_5:41948954-41952895	6.32897	9.51708	0.665012	0.630241	1
Ciclev10001500m.g	AT1G77120.1	alcohol dehydrogenase 1	scaffold_5:38320640-38322884	12.6762	3.16328	4.0073	0.0281315	0.174878
Ciclev10001502m.g	AT1G77120.1	alcohol dehydrogenase 1	scaffold_5:38314988-38317341	25.14	7.48095	3.36054	0.00161834	0.0176994
Ciclev10001505m.g	AT1G36050.2	Endoplasmic reticulum vesicle transporter protein	scaffold_5:36540903-36547227	88.6485	71.9989	1.23125	0.115285	0.483048
Ciclev10001506m.g	AT4G24500.2	hydroxyproline-rich glycoprotein family protein	scaffold_5:35521571-35526568	22.2662	18.3586	1.21285	0.53763	1
Ciclev10001508m.g	AT4G08150.1	KNOTTED-like from Arabidopsis thaliana	scaffold_5:34910793-34916593	0.084215	1e-05	8421.5	1	1
Ciclev10001509m.g	AT1G75330.1	ornithine carbamoyltransferase	scaffold_5:41190081-41192832	18.4963	16.196	1.14203	0.739602	1
Ciclev10001511m.g	AT3G62630.1	Protein of unknown function (DUF1645)	scaffold_5:33916070-33917739	0.0523714	0.235195	0.222672	1	1
Ciclev10001512m.g	AT1G34380.2	5\'-3\' exonuclease family protein	scaffold_5:39487474-39489870	12.869	17.7579	0.724692	0.475883	1
Ciclev10001513m.g	AT1G35910.1	Haloacid dehalogenase-like hydrolase (HAD) superfamily protein	scaffold_5:36526072-36528589	4.70297	9.63076	0.488328	0.303219	0.863068
Ciclev10001514m.g			scaffold_5:29581918-29583598	0.789	1.34161	0.588099	1	1
Ciclev10001515m.g	AT2G33560.1	BUB1-related (BUB1: budding uninhibited by benzymidazol 1)	scaffold_5:43079827-43083323	0.463932	0.518137	0.895385	1	1
Ciclev10001518m.g	AT5G09810.1	actin 7	scaffold_5:22691011-22694289	7.12309	4.30756	1.65363	0.415672	1
Ciclev10001522m.g	AT4G21390.1	S-locus lectin protein kinase family protein	scaffold_5:32208696-32211119	1.18124	1.41918	0.83234	1	1
Ciclev10001524m.g	AT5G28840.1	GDP-D-mannose 3\',5\'-epimerase	scaffold_5:29481816-29485113	98.2578	188.612	0.520952	6.27e-07	1.57e-05
Ciclev10001525m.g	AT1G20650.1	Protein kinase superfamily protein	scaffold_5:42764088-42767443	98.599	52.348	1.88353	8.65e-05	0.00137004
Ciclev10001527m.g	AT1G21410.1	F-box/RNI-like superfamily protein	scaffold_5:38120562-38123758	25.0735	29.4526	0.851317	0.78955	1
Ciclev10001528m.g	AT1G58110.1	Basic-leucine zipper (bZIP) transcription factor family protein	scaffold_5:6726816-6730833	8.37312	3.34915	2.50007	0.171891	0.626171
Ciclev10001531m.g	AT1G10210.1	mitogen-activated protein kinase 1	scaffold_5:41316977-41320780	35.0514	32.5725	1.0761	0.631268	1
Ciclev10001533m.g	AT3G21175.2	ZIM-like 1	scaffold_5:35441222-35446874	37.9738	60.0644	0.632218	0.0351017	0.208116
Ciclev10001534m.g	AT4G06634.1	zinc finger (C2H2 type) family protein	scaffold_5:6599710-6604334	8.33723	8.49827	0.98105	1	1
Ciclev10001538m.g	AT5G42440.1	Protein kinase superfamily protein	scaffold_5:38949629-38951212	29.9913	19.8689	1.50946	0.122535	0.502019
Ciclev10001539m.g	AT1G75230.2	DNA glycosylase superfamily protein	scaffold_5:41093724-41097411	24.9637	9.35817	2.66758	0.0102614	0.0794558
Ciclev10001543m.g	AT3G57710.1	Protein kinase superfamily protein	scaffold_5:33143268-33144676	0.210599	0.471939	0.446242	1	1
Ciclev10001544m.g	AT1G47230.1	CYCLIN A3;4	scaffold_5:34321003-34323724	0.24264	0.179996	1.34803	1	1
Ciclev10001546m.g	AT1G28230.1	purine permease 1	scaffold_5:35932958-35935079	21.4865	37.5549	0.572136	0.0698378	0.346557
Ciclev10001550m.g			scaffold_5:14689217-14691267	27.3458	25.0459	1.09183	0.685643	1
Ciclev10001551m.g	AT1G60750.1	NAD(P)-linked oxidoreductase superfamily protein	scaffold_5:29653121-29655450	13.7657	25.5668	0.538421	0.0830998	0.389786
Ciclev10001552m.g	AT4G14960.2	Tubulin/FtsZ family protein	scaffold_5:35027721-35030201	20.4321	13.279	1.53868	0.23677	0.757584
Ciclev10001558m.g			scaffold_5:38710118-38714774	5.03962	5.85829	0.860254	1	1
Ciclev10001559m.g	AT4G39090.1	Papain family cysteine protease	scaffold_5:41496791-41499173	374.204	370.996	1.00865	0.509707	1
Ciclev10001561m.g	AT1G75900.1	GDSL-like Lipase/Acylhydrolase superfamily protein	scaffold_5:42162733-42165933	0.783747	0.789785	0.992355	1	1
Ciclev10001562m.g	AT1G75220.1	Major facilitator superfamily protein	scaffold_5:41084274-41089200	36.5239	65.599	0.556775	0.0100457	0.0782866
Ciclev10001563m.g	AT1G78080.1	related to AP2 4	scaffold_5:36550506-36552800	689.31	246.338	2.79823	3.06e-53	9.56e-51
Ciclev10001564m.g	AT2G23790.1	Protein of unknown function (DUF607)	scaffold_5:40780715-40782937	1.84003	1.97158	0.933277	1	1
Ciclev10001565m.g	AT5G27930.1	Protein phosphatase 2C family protein	scaffold_5:33766086-33769182	28.5938	30.7554	0.929716	1	1
Ciclev10001569m.g	AT5G13500.1		scaffold_5:21545136-21549523	18.055	17.1472	1.05294	0.869783	1
Ciclev10001571m.g	AT1G45110.1	Tetrapyrrole (Corrin/Porphyrin) Methylases	scaffold_5:41390245-41394394	6.31936	13.2556	0.476731	0.191104	0.671397
Ciclev10001572m.g	AT1G43650.1	nodulin MtN21 /EamA-like transporter family protein	scaffold_5:38685604-38688349	5.71198	6.87983	0.83025	1	1
Ciclev10001575m.g	AT4G09760.3	Protein kinase superfamily protein	scaffold_5:39105671-39108800	208.542	100.224	2.08076	8.42e-11	3.73e-09
Ciclev10001576m.g	AT1G76920.1	F-box family protein	scaffold_5:38556651-38558181	16.1784	5.27122	3.06919	0.0205817	0.137719
Ciclev10001578m.g	AT1G75880.1	SGNH hydrolase-type esterase superfamily protein	scaffold_5:42170317-42173218	12.4076	33.3899	0.371597	0.00336128	0.0324042
Ciclev10001580m.g	AT5G45310.1		scaffold_5:29180179-29184765	0.230053	0.206826	1.1123	1	1
Ciclev10001581m.g	AT5G65420.1	CYCLIN D4;1	scaffold_5:35791061-35793496	0.237859	0.466479	0.509903	1	1
Ciclev10001582m.g	AT5G04990.1	SAD1/UNC-84 domain protein 1	scaffold_5:24058278-24059509	11.3912	3.77448	3.01795	0.0452596	0.252561
Ciclev10001583m.g	AT2G25710.1	holocarboxylase synthase 1	scaffold_5:37060930-37065943	11.6518	15.1249	0.770372	0.573754	1
Ciclev10001591m.g	AT1G06870.1	Peptidase S24/S26A/S26B/S26C family protein	scaffold_5:40526247-40529184	187.702	215.697	0.870211	0.344361	0.927141
Ciclev10001595m.g	AT2G30280.1	RNA-directed DNA methylation 4	scaffold_5:12849307-12853770	6.51172	8.10721	0.803201	0.804245	1
Ciclev10001596m.g	AT1G02170.1	metacaspase 1	scaffold_5:27294273-27299090	12.4671	10.8411	1.14998	0.685477	1
Ciclev10001597m.g	AT1G77470.1	replication factor C subunit 3	scaffold_5:37565046-37569231	40.8537	52.8523	0.772979	0.304251	0.861318
Ciclev10001599m.g	AT5G65860.1	ankyrin repeat family protein	scaffold_5:34474998-34478522	17.5402	14.6464	1.19758	0.602697	1
Ciclev10001600m.g	AT1G48460.1		scaffold_5:40628243-40630241	19.5459	24.8895	0.785307	0.555066	1
Ciclev10001601m.g	AT1G68140.1	Protein of unknown function (DUF1644)	scaffold_5:12246616-12250494	53.0763	30.4034	1.74574	0.00886401	0.0707003
Ciclev10001602m.g	AT5G43190.1	Galactose oxidase/kelch repeat superfamily protein	scaffold_5:34641430-34642548	11.9233	8.10353	1.47137	0.516764	1
Ciclev10001604m.g			scaffold_5:30838247-30839761	269.829	139.023	1.94089	8.35e-12	4.16e-10
Ciclev10001605m.g	AT4G09040.1	RNA-binding (RRM/RBD/RNP motifs) family protein	scaffold_5:36021217-36023150	59.9864	77.0251	0.77879	0.202325	0.696532
Ciclev10001606m.g	AT5G64920.1	COP1-interacting protein 8	scaffold_5:42021422-42023134	41.9009	13.7833	3.03998	8.49e-05	0.00135092
Ciclev10001611m.g	AT4G09670.1	Oxidoreductase family protein	scaffold_5:39241457-39245153	7.63514	10.4621	0.72979	0.648869	1
Ciclev10001613m.g	AT3G13960.1	growth-regulating factor 5	scaffold_5:24794458-24798226	2.71479	3.8735	0.700862	1	1
Ciclev10001614m.g	AT4G31940.1	cytochrome P450, family 82, subfamily C, polypeptide 4	scaffold_5:5919462-5922134	47.5273	41.6587	1.14087	0.460771	1
Ciclev10001615m.g	AT1G16130.1	wall associated kinase-like 2	scaffold_5:33079707-33082768	2.29325	5.57741	0.411168	0.508598	1
Ciclev10001616m.g	AT3G62770.1	Transducin/WD40 repeat-like superfamily protein	scaffold_5:33249884-33251932	3.83774	2.81555	1.36305	0.721429	1
Ciclev10001617m.g	AT1G20540.1	Transducin/WD40 repeat-like superfamily protein	scaffold_5:42589391-42594049	8.841	8.45421	1.04575	1	1
Ciclev10001618m.g	AT4G39330.1	cinnamyl alcohol dehydrogenase 9	scaffold_5:42228571-42230813	7.27763	21.8845	0.332547	0.0167486	0.117684
Ciclev10001620m.g	AT1G17020.1	senescence-related gene 1	scaffold_5:29233648-29235716	1.68233	0.829128	2.02904	0.617655	1
Ciclev10001621m.g	AT2G45440.1	dihydrodipicolinate synthase	scaffold_5:34294852-34297359	24.3499	28.5511	0.852853	0.785775	1
Ciclev10001623m.g	AT1G17010.1	2-oxoglutarate (2OG) and Fe(II)-dependent oxygenase superfamily protein	scaffold_5:29269466-29271520	7.62744	5.15593	1.47935	0.600877	1
Ciclev10001624m.g	AT1G74320.1	Protein kinase superfamily protein	scaffold_5:20805064-20810906	25.5015	17.9412	1.42139	0.227382	0.739525
Ciclev10001625m.g	AT1G20330.1	sterol methyltransferase 2	scaffold_5:42297978-42300281	9.15305	6.75249	1.35551	0.473225	1
Ciclev10001626m.g	AT1G17020.1	senescence-related gene 1	scaffold_5:29339627-29341639	0.257544	0.391569	0.657723	1	1
Ciclev10001627m.g	AT5G08750.1	RING/FYVE/PHD zinc finger superfamily protein	scaffold_5:15689221-15694276	17.7118	30.6653	0.577584	0.0884801	0.405876
Ciclev10001629m.g	AT4G24220.1	NAD(P)-binding Rossmann-fold superfamily protein	scaffold_5:23963706-23965204	0.739339	0.896757	0.824459	1	1
Ciclev10001630m.g	AT1G22360.1	UDP-glucosyl transferase 85A2	scaffold_5:36280827-36282328	23.9294	4.4826	5.33829	0.000263019	0.00371373
Ciclev10001634m.g	AT4G22720.1	Actin-like ATPase superfamily protein	scaffold_5:424432-427199	13.5114	20.4453	0.660856	0.313892	0.882162
Ciclev10001635m.g	AT1G19980.1	cytomatrix protein-related	scaffold_5:41932894-41936414	2.08184	3.49366	0.595891	1	1
Ciclev10001636m.g	AT4G24240.1	WRKY DNA-binding protein 7	scaffold_5:39928704-39930585	12.5164	20.4976	0.610628	0.232645	0.746483
Ciclev10001637m.g	AT1G56345.1	Pseudouridine synthase family protein	scaffold_5:33988528-33991585	5.16482	3.65513	1.41303	0.541376	1
Ciclev10001638m.g	AT1G31880.1	DZC (Disease resistance/zinc finger/chromosome condensation-like region) domain containing protein	scaffold_5:24467954-24473569	0.242211	0.053705	4.51003	1	1
Ciclev10001639m.g	AT1G43860.1	sequence-specific DNA binding transcription factors	scaffold_5:38186494-38189379	9.44136	21.9352	0.430421	0.0515544	0.278457
Ciclev10001640m.g	AT1G27700.1	Syntaxin/t-SNARE family protein	scaffold_5:34472166-34474847	158.833	176.771	0.898524	0.548697	1
Ciclev10001644m.g	AT2G44270.1	repressor of lrx1	scaffold_5:42455993-42459424	18.8396	20.9123	0.900886	0.875626	1
Ciclev10001645m.g	AT5G45410.1		scaffold_5:24386172-24389558	23.0145	27.488	0.837256	0.781796	1
Ciclev10001646m.g	AT1G78110.1		scaffold_5:36504700-36506386	1.26767	0.339907	3.72946	0.617655	1
Ciclev10001647m.g	AT2G39970.1	Mitochondrial substrate carrier family protein	scaffold_5:43288730-43293234	73.8159	74.1332	0.99572	0.934728	1
Ciclev10001648m.g	AT1G17020.1	senescence-related gene 1	scaffold_5:29274444-29276842	18.5682	13.9104	1.33484	0.38508	0.96198
Ciclev10001649m.g	AT1G32170.1	xyloglucan endotransglucosylase/hydrolase 30	scaffold_5:26615176-26617732	2.74446	2.88472	0.951378	1	1
Ciclev10001657m.g	AT1G21710.1	8-oxoguanine-DNA glycosylase 1	scaffold_5:37622886-37624944	31.2322	21.9528	1.4227	0.136623	0.543402
Ciclev10001658m.g	AT1G19300.1	Nucleotide-diphospho-sugar transferases superfamily protein	scaffold_5:40728916-40730477	6.59028	1.92217	3.42856	0.102907	0.451001
Ciclev10001659m.g	AT3G05580.1	Calcineurin-like metallo-phosphoesterase superfamily protein	scaffold_5:33416340-33422684	66.0391	51.3271	1.28663	0.119274	0.492828
Ciclev10001660m.g	AT5G56750.1	N-MYC downregulated-like 1	scaffold_5:30531742-30535211	93.0021	39.6166	2.34755	9.26e-07	2.25e-05
Ciclev10001661m.g	AT5G54160.1	O-methyltransferase 1	scaffold_5:7157124-7159270	0.0604526	0.0673703	0.897318	1	1
Ciclev10001665m.g	AT1G20850.1	xylem cysteine peptidase 2	scaffold_5:42957413-42959269	0.0818985	0.183896	0.445352	1	1
Ciclev10001672m.g	AT1G60940.1	SNF1-related protein kinase 2.10	scaffold_5:8503780-8508594	9.80508	13.4601	0.728455	0.543212	1
Ciclev10001675m.g	AT4G35800.1	RNA polymerase II large subunit	scaffold_5:29529611-29531276	0.808756	0.270956	2.98482	1	1
Ciclev10001676m.g	AT3G01400.1	ARM repeat superfamily protein	scaffold_5:34627882-34630017	130.024	253.73	0.51245	3.53e-09	1.28e-07
Ciclev10001677m.g	AT2G36690.1	2-oxoglutarate (2OG) and Fe(II)-dependent oxygenase superfamily protein	scaffold_5:35974953-35979998	19.6786	52.4461	0.375216	0.000234137	0.00334003
Ciclev10001679m.g	AT5G42630.1	Homeodomain-like superfamily protein	scaffold_5:40569722-40573126	11.3887	11.5974	0.982005	1	1
Ciclev10001682m.g	AT1G78140.1	S-adenosyl-L-methionine-dependent methyltransferases superfamily protein	scaffold_5:36472136-36475001	82.2198	122.637	0.670432	0.0145209	0.104652
Ciclev10001683m.g	AT5G65640.1	beta HLH protein 93	scaffold_5:35173757-35175204	1e-05	0.100263	9.97e-05	1	1
Ciclev10001685m.g	AT4G09010.1	ascorbate peroxidase 4	scaffold_5:36095843-36099890	49.1179	47.6335	1.03116	0.761982	1
Ciclev10001686m.g	AT1G20830.1	multiple chloroplast division site 1	scaffold_5:42915820-42918262	21.7207	18.002	1.20657	0.639999	1
Ciclev10001687m.g	AT5G56590.1	O-Glycosyl hydrolases family 17 protein	scaffold_5:42867853-42869593	0.333975	0.247917	1.34712	1	1
Ciclev10001688m.g	AT5G27560.1	Domain of unknown function (DUF1995)	scaffold_5:32925602-32929147	23.6372	34.1428	0.692304	0.241121	0.761812
Ciclev10001689m.g	AT1G60690.1	NAD(P)-linked oxidoreductase superfamily protein	scaffold_5:29661411-29663964	24.0821	25.7191	0.936351	1	1
Ciclev10001690m.g	AT4G10960.1	UDP-D-glucose/UDP-D-galactose 4-epimerase 5	scaffold_5:5208801-5210344	18.0905	10.4535	1.73057	0.143841	0.558908
Ciclev10001691m.g	AT1G71900.1	Protein of unknown function (DUF803)	scaffold_5:39469303-39473928	18.6338	12.0252	1.54956	0.289537	0.844105
Ciclev10001692m.g	AT1G76080.1	chloroplastic drought-induced stress protein of 32 kD	scaffold_5:42294269-42295612	92.8896	205.263	0.452539	4.07e-10	1.66e-08
Ciclev10001693m.g	AT1G31830.1	Amino acid permease family protein	scaffold_5:28145684-28147060	1.75178	1.96144	0.893109	1	1
Ciclev10001694m.g	AT1G71900.1	Protein of unknown function (DUF803)	scaffold_5:6464855-6470466	45.0513	27.3797	1.64543	0.0267791	0.168418
Ciclev10001697m.g	AT3G57730.1	Protein kinase superfamily protein	scaffold_5:33068049-33069093	7.29547	6.24548	1.16812	0.800252	1
Ciclev10001700m.g	AT1G21370.1		scaffold_5:38404014-38407692	4.3016	2.44456	1.75966	0.499686	1
Ciclev10001701m.g	AT4G40080.1	ENTH/ANTH/VHS superfamily protein	scaffold_5:35972716-35974167	31.0527	6.15666	5.04376	3.32e-05	0.000588075
Ciclev10001702m.g	AT1G60690.1	NAD(P)-linked oxidoreductase superfamily protein	scaffold_5:29664370-29666993	3.28699	6.44005	0.510398	0.549728	1
Ciclev10001704m.g	AT5G28150.1	Plant protein of unknown function (DUF868)	scaffold_5:30549142-30550604	0.57338	0.530784	1.08025	1	1
Ciclev10001705m.g	AT1G60710.1	NAD(P)-linked oxidoreductase superfamily protein	scaffold_5:29646970-29649511	27.688	45.9847	0.602113	0.0625037	0.318826
Ciclev10001706m.g	AT1G58280.1	Phosphoglycerate mutase family protein	scaffold_5:35187716-35192462	151.686	46.8763	3.23588	3.78e-15	2.55e-13
Ciclev10001708m.g	AT1G22170.1	Phosphoglycerate mutase family protein	scaffold_5:36627643-36631386	227.293	75.3233	3.01757	2.88e-20	2.76e-18
Ciclev10001709m.g	AT1G21070.1	Nucleotide-sugar transporter family protein	scaffold_5:43275223-43279116	39.2984	27.987	1.40417	0.11526	0.483363
Ciclev10001711m.g	AT5G27710.1		scaffold_5:33329875-33334212	3.80153	2.62649	1.44738	0.721429	1
Ciclev10001712m.g	AT3G26430.1	GDSL-like Lipase/Acylhydrolase superfamily protein	scaffold_5:37381117-37383462	2.13281	4.61248	0.4624	0.726999	1
Ciclev10001713m.g	AT1G60680.1	NAD(P)-linked oxidoreductase superfamily protein	scaffold_5:29615828-29618203	18.8141	49.2702	0.381856	0.000400535	0.00539565
Ciclev10001715m.g	AT1G43700.1	VIRE2-interacting protein 1	scaffold_5:38566191-38571337	54.1995	14.7424	3.67644	4.85e-07	1.24e-05
Ciclev10001718m.g	AT3G49340.1	Cysteine proteinases superfamily protein	scaffold_5:25168302-25169838	20.3537	13.204	1.54148	0.23677	0.757584
Ciclev10001719m.g	AT3G49340.1	Cysteine proteinases superfamily protein	scaffold_5:24874678-24876113	52.6756	30.855	1.7072	0.011675	0.0878026
Ciclev10001720m.g	AT5G27320.1	alpha/beta-Hydrolases superfamily protein	scaffold_5:32300020-32302876	8.58096	14.1543	0.606244	0.309785	0.873791
Ciclev10001721m.g	AT1G60690.1	NAD(P)-linked oxidoreductase superfamily protein	scaffold_5:29643474-29645970	25.4427	38.2245	0.665612	0.172195	0.623171
Ciclev10001722m.g	AT1G68620.1	alpha/beta-Hydrolases superfamily protein	scaffold_5:20746474-20747919	35.1199	11.8269	2.96949	0.000404025	0.0054238
Ciclev10001723m.g	AT3G49340.1	Cysteine proteinases superfamily protein	scaffold_5:25625107-25626537	7.96781	4.65918	1.71013	0.415672	1
Ciclev10001724m.g	AT3G05100.1	S-adenosyl-L-methionine-dependent methyltransferases superfamily protein	scaffold_5:30800766-30803631	73.3877	13.56	5.41207	1.02e-11	5.02e-10
Ciclev10001726m.g	AT1G71695.1	Peroxidase superfamily protein	scaffold_5:38960062-38963401	32.6862	14.3729	2.27415	0.00864392	0.0693736
Ciclev10001727m.g	AT1G71860.1	protein tyrosine phosphatase 1	scaffold_5:39546369-39551019	25.4754	26.7935	0.950805	1	1
Ciclev10001729m.g	AT2G33620.1	AT hook motif DNA-binding family protein	scaffold_5:42978751-42983950	6.91754	7.92273	0.873126	1	1
Ciclev10001733m.g	AT1G59600.1	ZCW7	scaffold_5:34659784-34662439	13.3795	10.7904	1.23994	0.551167	1
Ciclev10001734m.g	AT1G43670.1	Inositol monophosphatase family protein	scaffold_5:38621879-38625968	114.241	98.4477	1.16042	0.171818	0.62602
Ciclev10001735m.g	AT3G15140.1	Polynucleotidyl transferase, ribonuclease H-like superfamily protein	scaffold_5:21234823-21242004	76.1643	105.834	0.719658	0.0645438	0.327421
Ciclev10001736m.g	AT1G76050.2	Pseudouridine synthase family protein	scaffold_5:42278458-42281186	3.29112	4.89719	0.672043	1	1
Ciclev10001737m.g	AT5G64460.1	Phosphoglycerate mutase family protein	scaffold_5:35217312-35224160	38.0223	3.52938	10.7731	1.08e-08	3.59e-07
Ciclev10001739m.g	AT1G77610.1	EamA-like transporter family protein	scaffold_5:37302526-37305633	55.7599	31.1743	1.78865	0.00735433	0.0611009
Ciclev10001740m.g	AT5G42750.1	BRI1 kinase inhibitor 1	scaffold_5:40265387-40267186	8.79849	8.60836	1.02209	1	1
Ciclev10001741m.g	AT3G57730.1	Protein kinase superfamily protein	scaffold_5:33038071-33039438	2.56364	2.42089	1.05897	1	1
Ciclev10001742m.g	AT4G06676.1		scaffold_5:6473732-6478666	5.07904	9.28477	0.547029	0.455959	1
Ciclev10001743m.g	AT4G09750.1	NAD(P)-binding Rossmann-fold superfamily protein	scaffold_5:39108939-39111981	33.4189	60.0381	0.556628	0.0102334	0.0794936
Ciclev10001744m.g	AT1G09320.1	agenet domain-containing protein	scaffold_5:34219816-34223850	3.06216	2.60769	1.17428	0.721429	1
Ciclev10001747m.g	AT5G26940.1	Polynucleotidyl transferase, ribonuclease H-like superfamily protein	scaffold_5:33861383-33864591	13.6775	10.3043	1.32736	0.551167	1
Ciclev10001749m.g	AT1G60690.1	NAD(P)-linked oxidoreductase superfamily protein	scaffold_5:29658640-29660545	16.9432	26.9897	0.627765	0.177949	0.640403
Ciclev10001753m.g	AT1G31130.1		scaffold_5:38149173-38151063	240.337	334.046	0.719473	0.000619892	0.00784818
Ciclev10001754m.g	AT4G33950.1	Protein kinase superfamily protein	scaffold_5:36175339-36178656	9.54611	11.5739	0.824796	0.832549	1
Ciclev10001756m.g	AT4G08170.2	Inositol 1,3,4-trisphosphate 5/6-kinase family protein	scaffold_5:34978110-34983399	73.2453	81.9431	0.893856	0.748844	1
Ciclev10001758m.g	AT1G22180.2	Sec14p-like phosphatidylinositol transfer family protein	scaffold_5:36616632-36620799	57.3981	32.3912	1.77203	0.00610621	0.0529588
Ciclev10001759m.g	AT3G54390.1	sequence-specific DNA binding transcription factors	scaffold_5:21459893-21463088	13.1017	33.2801	0.39368	0.00596016	0.0520184
Ciclev10001762m.g	AT5G15940.1	NAD(P)-binding Rossmann-fold superfamily protein	scaffold_5:21071128-21074475	4.19576	8.36926	0.50133	0.425266	1
Ciclev10001764m.g	AT5G27620.1	cyclin H;1	scaffold_5:33178091-33182694	21.0805	24.2512	0.869256	0.772961	1
Ciclev10001765m.g	AT1G25290.2	RHOMBOID-like protein 10	scaffold_5:10004910-10009427	5.4395	7.95615	0.683685	0.791112	1
Ciclev10001766m.g	AT3G22370.1	alternative oxidase 1A	scaffold_5:27526156-27539324	8.63349	2.98169	2.8955	0.0865481	0.401389
Ciclev10001767m.g	AT1G09575.1	Protein of unknown function (DUF607)	scaffold_5:14808605-14812187	7.75083	10.6206	0.729792	0.648869	1
Ciclev10001768m.g	AT4G02590.1	basic helix-loop-helix (bHLH) DNA-binding superfamily protein	scaffold_5:29438710-29443724	0.963193	0.502359	1.91734	1	1
Ciclev10001769m.g	AT1G34020.1	Nucleotide-sugar transporter family protein	scaffold_5:39014888-39018279	24.7265	20.5916	1.20081	0.555766	1
Ciclev10001771m.g	AT5G07200.1	gibberellin 20-oxidase 3	scaffold_5:16573304-16575476	0.114003	0.127264	0.895799	1	1
Ciclev10001773m.g	AT1G71180.1	6-phosphogluconate dehydrogenase family protein	scaffold_5:9486034-9487216	7.01818	8.5476	0.82107	1	1
Ciclev10001775m.g	AT5G27290.1		scaffold_5:32316721-32320120	15.7419	29.0267	0.542325	0.0562714	0.297868
Ciclev10001784m.g	AT5G67380.1	casein kinase alpha 1	scaffold_5:34501166-34506609	77.0067	60.3177	1.27668	0.106693	0.460609
Ciclev10001785m.g	AT5G06970.1	Protein of unknown function (DUF810)	scaffold_5:21315008-21321683	23.3953	20.9006	1.11936	0.655171	1
Ciclev10001787m.g			scaffold_5:26990578-26998915	12.5567	15.2119	0.825452	0.712681	1
Ciclev10001788m.g	AT1G63610.2		scaffold_5:42608365-42611050	94.1086	92.6345	1.01591	0.715431	1
Ciclev10001790m.g	AT5G66240.2	Transducin/WD40 repeat-like superfamily protein	scaffold_5:4289875-4293690	13.7173	16.4425	0.834259	0.721771	1
Ciclev10001792m.g	AT1G02740.1	MRG family protein	scaffold_5:39828395-39834822	11.3816	15.2556	0.74606	0.573754	1
Ciclev10001793m.g	AT3G04940.1	cysteine synthase D1	scaffold_5:30672426-30675502	20.143	32.1548	0.626438	0.172946	0.624372
Ciclev10001794m.g	AT4G06599.1	ubiquitin family protein	scaffold_5:6699439-6702636	7.13716	14.4668	0.493348	0.212137	0.711336
Ciclev10001796m.g	AT1G75380.1	bifunctional nuclease in basal defense response 1	scaffold_5:41266551-41270666	76.9726	118.221	0.651091	0.00658913	0.0559686
Ciclev10001800m.g	AT1G31130.1		scaffold_5:17564728-17565994	87.5451	181.783	0.481591	6.51e-08	1.95e-06
Ciclev10001802m.g	AT2G02400.1	NAD(P)-binding Rossmann-fold superfamily protein	scaffold_5:284909-289108	27.2234	31.1179	0.874847	0.796553	1
Ciclev10001804m.g	AT4G33380.1		scaffold_5:40290003-40294279	18.7258	14.8726	1.25908	0.493806	1
Ciclev10001805m.g	AT1G22030.1		scaffold_5:36845846-36847355	0.163193	0.358031	0.455807	1	1
Ciclev10001807m.g	AT5G28830.1	calcium-binding EF hand family protein	scaffold_5:29489011-29492069	66.9034	44.9631	1.48796	0.0232522	0.150995
Ciclev10001810m.g	AT4G09060.1		scaffold_5:36018226-36020546	2.03704	1.83933	1.10749	0.681506	1
Ciclev10001812m.g	AT3G16150.1	N-terminal nucleophile aminohydrolases (Ntn hydrolases) superfamily protein	scaffold_5:39862761-39864726	25.5141	29.554	0.863304	0.78955	1
Ciclev10001813m.g	AT1G44835.2	YbaK/aminoacyl-tRNA synthetase-associated domain	scaffold_5:37212830-37217761	37.8963	42.7233	0.887017	0.739688	1
Ciclev10001816m.g	AT1G76110.1	HMG (high mobility group) box protein with ARID/BRIGHT DNA-binding domain	scaffold_5:42353393-42356254	6.62117	16.2454	0.407572	0.0651747	0.328898
Ciclev10001818m.g	AT1G76500.1	Predicted AT-hook DNA-binding family protein	scaffold_5:43031750-43032859	0.23842	0.17499	1.36248	1	1
Ciclev10001820m.g	AT3G05625.1	Tetratricopeptide repeat (TPR)-like superfamily protein	scaffold_5:33752933-33756369	6.77066	10.8594	0.623484	0.482279	1
Ciclev10001821m.g	AT3G04940.1	cysteine synthase D1	scaffold_5:30686645-30690188	98.3153	152.097	0.646399	0.0019995	0.0210018
Ciclev10001822m.g	AT4G24570.1	dicarboxylate carrier 2	scaffold_5:35721730-35723544	173.261	296.961	0.583447	1.67e-07	4.63e-06
Ciclev10001823m.g	AT1G21760.1	F-box protein 7	scaffold_5:37449700-37453928	25.0346	26.3456	0.950238	1	1
Ciclev10001824m.g	AT1G75520.1	SHI-related sequence 5	scaffold_5:41513451-41514893	0.0787825	1e-05	7878.25	1	1
Ciclev10001826m.g	AT3G05710.2	syntaxin of plants 43	scaffold_5:33854543-33858355	23.7875	23.8312	0.998166	1	1
Ciclev10001827m.g	AT4G08460.1	Protein of unknown function (DUF1644)	scaffold_5:36952669-36956759	15.0722	13.1397	1.14707	0.716278	1
Ciclev10001828m.g	AT1G76730.1	NagB/RpiA/CoA transferase-like superfamily protein	scaffold_5:38879747-38882455	41.8735	47.5441	0.88073	0.674593	1
Ciclev10001829m.g	AT1G21780.1	BTB/POZ domain-containing protein	scaffold_5:37437226-37439812	4.74934	14.9775	0.317098	0.0421867	0.238717
Ciclev10001832m.g			scaffold_5:41941762-41943552	2.14783	4.21677	0.509354	0.726999	1
Ciclev10001834m.g	AT1G07840.1	Sas10/Utp3/C1D family	scaffold_5:35414985-35417163	16.1273	29.6224	0.544429	0.0817395	0.387442
Ciclev10001835m.g	AT4G14880.1	O-acetylserine (thiol) lyase (OAS-TL) isoform A1	scaffold_5:30655730-30659789	66.1108	80.4797	0.821459	0.367354	0.944512
Ciclev10001840m.g	AT2G02370.1	SNARE associated Golgi protein family	scaffold_5:101796-108313	32.9793	46.5921	0.70783	0.18026	0.645122
Ciclev10001842m.g	AT4G39460.1	S-adenosylmethionine carrier 1	scaffold_5:39096918-39102030	5.13946	9.91217	0.5185	0.455959	1
Ciclev10001844m.g	AT2G02400.1	NAD(P)-binding Rossmann-fold superfamily protein	scaffold_5:165096-169348	175.425	309.511	0.566781	1.55e-08	5.05e-07
Ciclev10001847m.g	AT5G49700.1	Predicted AT-hook DNA-binding family protein	scaffold_5:35674415-35675935	93.4913	11.4124	8.19208	8.23e-18	6.64e-16
Ciclev10001849m.g	AT1G35560.1	TCP family transcription factor	scaffold_5:39325975-39327488	4.66731	2.32158	2.0104	0.499686	1
Ciclev10001851m.g	AT1G45688.1		scaffold_5:40053323-40055053	44.5819	36.1848	1.23206	0.320535	0.891512
Ciclev10001852m.g	AT5G49950.1	alpha/beta-Hydrolases superfamily protein	scaffold_5:6020768-6023723	15.8771	11.3949	1.39335	0.451671	1
Ciclev10001853m.g	AT4G08980.1	F-BOX WITH WD-40 2	scaffold_5:36210238-36213202	35.9515	60.4093	0.595132	0.0195673	0.132813
Ciclev10001854m.g	AT4G08950.1	Phosphate-responsive 1 family protein	scaffold_5:36229309-36230518	2270.09	2697.25	0.841631	3.32e-06	7.26e-05
Ciclev10001855m.g	AT2G33590.1	NAD(P)-binding Rossmann-fold superfamily protein	scaffold_5:32292685-32294775	4.08425	5.19848	0.785662	1	1
Ciclev10001857m.g	AT1G71760.1		scaffold_5:39157247-39158454	0.0758826	1e-05	7588.26	1	1
Ciclev10001859m.g	AT5G42560.1	Abscisic acid-responsive (TB2/DP1, HVA22) family protein	scaffold_5:41855155-41858573	7.32188	9.38919	0.77982	0.815194	1
Ciclev10001860m.g	AT1G44130.1	Eukaryotic aspartyl protease family protein	scaffold_5:37541298-37543916	79.5665	32.1	2.47871	3.04e-06	6.71e-05
Ciclev10001861m.g	AT5G42150.1	Glutathione S-transferase family protein	scaffold_5:42129356-42132690	52.9625	49.1929	1.07663	0.623811	1
Ciclev10001862m.g	AT1G34780.1	APR-like 4	scaffold_5:36344743-36347545	111.34	66.2516	1.68056	0.000310302	0.00430288
Ciclev10001863m.g	AT1G22030.1		scaffold_5:8562147-8563362	0.334151	0.625454	0.534254	1	1
Ciclev10001864m.g	AT1G75090.1	DNA glycosylase superfamily protein	scaffold_5:40835332-40838299	0.700114	2.26503	0.309097	0.625299	1
Ciclev10001866m.g	AT1G06890.1	nodulin MtN21 /EamA-like transporter family protein	scaffold_5:13779700-13783960	67.717	95.1187	0.711921	0.0605807	0.313143
Ciclev10001867m.g	AT1G23850.1		scaffold_5:33801544-33802689	110.377	115.212	0.958034	1	1
Ciclev10001869m.g	AT3G05290.1	peroxisomal adenine nucleotide carrier 1	scaffold_5:32900140-32903124	109.123	68.7206	1.58792	0.000957112	0.0113389
Ciclev10001872m.g	AT1G56430.1	nicotianamine synthase 4	scaffold_5:34032195-34033465	18.1599	23.0976	0.786225	0.545858	1
Ciclev10001873m.g	AT4G33580.1	beta carbonic anhydrase 5	scaffold_5:35661716-35664130	58.7128	79.3769	0.739671	0.127268	0.516599
Ciclev10001875m.g	AT4G33480.1		scaffold_5:15870168-15874904	28.6671	48.9128	0.586086	0.0412014	0.234168
Ciclev10001879m.g	AT2G01710.1	Chaperone DnaJ-domain superfamily protein	scaffold_5:35644332-35646412	10.9954	3.86141	2.84751	0.0717948	0.35382
Ciclev10001881m.g	AT3G05600.1	alpha/beta-Hydrolases superfamily protein	scaffold_5:33632689-33634531	0.0943116	0.288156	0.327294	1	1
Ciclev10001885m.g	AT1G75800.1	Pathogenesis-related thaumatin superfamily protein	scaffold_5:41987451-41990041	138.222	90.0368	1.53517	0.000577947	0.0073994
Ciclev10001886m.g	AT1G21600.1	plastid transcriptionally active 6	scaffold_5:37797901-37801204	11.2593	12.6356	0.891078	1	1
Ciclev10001887m.g	AT1G22700.1	Tetratricopeptide repeat (TPR)-like superfamily protein	scaffold_5:39490553-39494084	22.6908	30.0212	0.755826	0.414411	1
Ciclev10001888m.g	AT1G35720.1	annexin 1	scaffold_5:36449345-36452178	41.368	82.1669	0.503463	0.000622406	0.00785945
Ciclev10001889m.g	AT1G78100.1	F-box family protein	scaffold_5:36513674-36515140	7.299	2.06432	3.53579	0.138749	0.546024
Ciclev10001891m.g	AT1G43900.1	Protein phosphatase 2C family protein	scaffold_5:38134661-38138860	6.44054	8.67302	0.742595	0.804245	1
Ciclev10001892m.g	AT2G26550.2	heme oxygenase 2	scaffold_5:40354838-40359170	10.58	21.1938	0.499203	0.0821217	0.388492
Ciclev10001893m.g	AT3G56850.1	ABA-responsive element binding protein 3	scaffold_5:24048370-24050536	3.54103	5.00354	0.707705	0.754397	1
Ciclev10001894m.g	AT1G76450.1	Photosystem II reaction center PsbP family protein	scaffold_5:42985832-42990116	79.6701	92.5666	0.860679	0.494093	1
Ciclev10001896m.g	AT1G78210.1	alpha/beta-Hydrolases superfamily protein	scaffold_5:36358701-36360083	1.17217	1.11804	1.04842	1	1
Ciclev10001897m.g	AT3G17380.1	TRAF-like family protein	scaffold_5:27236138-27238043	1e-05	0.892667	1.12e-05	1	1
Ciclev10001898m.g	AT3G17380.1	TRAF-like family protein	scaffold_5:27180795-27182710	0.660147	0.318057	2.07556	1	1
Ciclev10001901m.g	AT3G12320.1		scaffold_5:21098416-21102608	8.01412	20.1748	0.397234	0.0440037	0.247263
Ciclev10001904m.g	AT1G75180.1	Erythronate-4-phosphate dehydrogenase family protein	scaffold_5:41005053-41009439	6.74168	6.09274	1.10651	1	1
Ciclev10001906m.g	AT3G17380.1	TRAF-like family protein	scaffold_5:27169539-27171569	0.0947921	0.319328	0.296849	1	1
Ciclev10001907m.g	AT1G77122.1	Uncharacterised protein family UPF0090	scaffold_5:38371610-38374396	4.8729	12.3223	0.395454	0.0974393	0.435117
Ciclev10001908m.g	AT5G23540.1	Mov34/MPN/PAD-1 family protein	scaffold_5:40317720-40321609	85.0306	112.666	0.754714	0.103513	0.450494
Ciclev10001912m.g	AT4G24175.1		scaffold_5:41975363-41977621	4.2138	5.92396	0.711315	1	1
Ciclev10001913m.g	AT1G32100.1	pinoresinol reductase 1	scaffold_5:25788253-25792720	3.66878	6.86931	0.534083	0.549728	1
Ciclev10001914m.g	AT1G75540.1	salt tolerance homolog2	scaffold_5:41555117-41556812	3.28578	2.09455	1.56873	0.721429	1
Ciclev10001916m.g	AT3G17380.1	TRAF-like family protein	scaffold_5:27161365-27163409	0.449524	0.405405	1.10883	1	1
Ciclev10001923m.g	AT3G17380.1	TRAF-like family protein	scaffold_5:27349476-27355235	1.97616	2.20964	0.894336	1	1
Ciclev10001927m.g	AT1G77330.1	2-oxoglutarate (2OG) and Fe(II)-dependent oxygenase superfamily protein	scaffold_5:37767592-37768939	1e-05	0.186675	5.36e-05	1	1
Ciclev10001930m.g	AT3G17380.1	TRAF-like family protein	scaffold_5:7473877-7476158	1e-05	0.217979	4.59e-05	1	1
Ciclev10001931m.g	AT5G27210.1	Protein of unknown function, transmembrane-40	scaffold_5:31091781-31094489	44.38	54.156	0.819484	0.484015	1
Ciclev10001934m.g	AT3G17380.1	TRAF-like family protein	scaffold_5:27153993-27156141	0.726675	0.909753	0.798761	1	1
Ciclev10001935m.g	AT2G24960.2		scaffold_5:41842465-41844878	10.1084	13.3921	0.754803	0.691519	1
Ciclev10001938m.g	AT1G78310.1	VQ motif-containing protein	scaffold_5:36166729-36168991	9.39779	2.40005	3.91566	0.0530682	0.28528
Ciclev10001939m.g	AT1G76150.1	enoyl-CoA hydratase 2	scaffold_5:42432895-42436163	135.468	120.469	1.12451	0.212619	0.71086
Ciclev10001941m.g	AT3G04880.1	DNA-damage-repair/toleration protein (DRT102)	scaffold_5:30537835-30539062	17.4456	11.6031	1.50353	0.274203	0.823205
Ciclev10001942m.g	AT3G04880.1	DNA-damage-repair/toleration protein (DRT102)	scaffold_5:30542372-30543922	7.02577	6.28332	1.11816	0.800252	1
Ciclev10001943m.g	AT1G35420.2	alpha/beta-Hydrolases superfamily protein	scaffold_5:39677784-39679367	100.639	157.289	0.639835	0.00147697	0.0163658
Ciclev10001944m.g	AT4G15920.1	Nodulin MtN3 family protein	scaffold_5:33617068-33620365	4.12902	3.19716	1.29146	0.749386	1
Ciclev10001946m.g	AT1G75280.1	NmrA-like negative transcriptional regulator family protein	scaffold_5:41158107-41160518	0.402035	0.357401	1.12488	1	1
Ciclev10001947m.g	AT1G71180.1	6-phosphogluconate dehydrogenase family protein	scaffold_5:9482015-9482939	0.366286	0.0996202	3.67682	1	1
Ciclev10001952m.g	AT1G75240.1	homeobox protein 33	scaffold_5:41111529-41113532	0.185142	0.253229	0.731125	1	1
Ciclev10001956m.g	AT1G01720.1	NAC (No Apical Meristem) domain transcriptional regulator superfamily protein	scaffold_5:15762363-15766976	634.935	621.244	1.02204	0.283625	0.83403
Ciclev10001961m.g	AT1G35780.1		scaffold_5:36463101-36467207	3.12647	2.38788	1.30931	0.721429	1
Ciclev10001964m.g	AT3G53010.1	Domain of unknown function (DUF303)	scaffold_5:39852395-39853836	1.86057	0.539016	3.45179	0.617655	1
Ciclev10001965m.g	AT2G26540.1	uroporphyrinogen-III synthase family protein	scaffold_5:40393801-40400154	23.337	20.8554	1.11899	0.655171	1
Ciclev10001966m.g	AT4G02550.1		scaffold_5:20076282-20078302	12.4652	9.39751	1.32644	0.5349	1
Ciclev10001967m.g	AT2G20410.1	RNA-binding ASCH domain protein	scaffold_5:25978504-25981882	3.76953	6.89482	0.546719	0.549728	1
Ciclev10001968m.g	AT5G64260.1	EXORDIUM like 2	scaffold_5:36226059-36227269	644.297	293.371	2.19619	4.1e-34	8.11e-32
Ciclev10001970m.g	AT5G64260.1	EXORDIUM like 2	scaffold_5:36219782-36221019	1925.94	857.267	2.2466	4.7e-103	4.14e-100
Ciclev10001973m.g	AT1G32220.1	NAD(P)-binding Rossmann-fold superfamily protein	scaffold_5:26990578-26998915	69.1302	81.5442	0.847764	0.516444	1
Ciclev10001975m.g	AT3G05170.1	Phosphoglycerate mutase family protein	scaffold_5:31903631-31906548	5.46136	1.6727	3.265	0.171554	0.6304
Ciclev10001976m.g	AT1G01720.1	NAC (No Apical Meristem) domain transcriptional regulator superfamily protein	scaffold_5:37586833-37589255	267.1	137.934	1.93643	6.55e-12	3.31e-10
Ciclev10001978m.g	AT1G75080.1	Brassinosteroid signalling positive regulator (BZR1) family protein	scaffold_5:40832602-40834625	17.3448	20.5605	0.843598	0.751153	1
Ciclev10001979m.g	AT5G67300.1	myb domain protein r1	scaffold_5:39839983-39841860	300.084	434.674	0.690366	1.1e-05	0.000216866
Ciclev10001980m.g	AT1G36390.1	Co-chaperone GrpE family protein	scaffold_5:36859868-36862687	12.4845	16.3279	0.764611	0.586929	1
Ciclev10001981m.g	AT1G20990.1	Cysteine/Histidine-rich C1 domain family protein	scaffold_5:43115352-43116448	5.87983	7.18772	0.818038	0.791112	1
Ciclev10001982m.g	AT3G05520.2	Subunits of heterodimeric actin filament capping protein Capz superfamily	scaffold_5:33338363-33342254	6.37363	12.8623	0.495528	0.265092	0.808387
Ciclev10001987m.g	AT5G27395.2	Mitochondrial inner membrane translocase complex, subunit Tim44-related protein	scaffold_5:31889007-31893608	10.3354	12.6961	0.814061	0.83959	1
Ciclev10001988m.g	AT1G02560.1	nuclear encoded CLP protease 5	scaffold_5:34048781-34052274	74.3301	114.608	0.648559	0.00892242	0.0710783
Ciclev10001989m.g	AT1G76610.1	Protein of unknown function, DUF617	scaffold_5:43143531-43144749	2.31885	1.12235	2.06607	0.681506	1
Ciclev10001990m.g	AT4G24230.6	acyl-CoA-binding domain 3	scaffold_5:34490116-34493454	23.8146	5.88165	4.04897	0.000733782	0.00910548
Ciclev10001991m.g	AT3G04830.1	Protein prenylyltransferase superfamily protein	scaffold_5:29863748-29867354	57.0036	46.7025	1.22057	0.205947	0.703622
Ciclev10001994m.g	AT4G10380.1	NOD26-like intrinsic protein 5;1	scaffold_5:38307996-38311278	0.510146	0.188528	2.70594	1	1
Ciclev10001997m.g	AT2G20830.1	transferases;folic acid binding	scaffold_5:2317953-2322201	6.50466	13.9534	0.46617	0.191104	0.671397
Ciclev10001998m.g	AT1G71200.1	basic helix-loop-helix (bHLH) DNA-binding superfamily protein	scaffold_5:9404249-9407709	0.260688	1e-05	26068.8	1	1
Ciclev10001999m.g	AT5G28150.1	Plant protein of unknown function (DUF868)	scaffold_5:30522831-30524198	35.786	13.5684	2.63745	0.00157569	0.0173406
Ciclev10002001m.g	AT1G54780.1	thylakoid lumen 18.3 kDa protein	scaffold_5:31874383-31876484	37.1343	102.4	0.36264	1.15e-07	3.3e-06
Ciclev10002002m.g	AT1G18340.1	basal transcription factor complex subunit-related	scaffold_5:37270210-37274678	27.7519	35.0747	0.791223	0.453731	1
Ciclev10002003m.g	AT2G35490.1	Plastid-lipid associated protein PAP / fibrillin family protein	scaffold_5:27136303-27138939	14.0574	16.9427	0.829702	0.860941	1
Ciclev10002005m.g	AT1G42990.1	basic region/leucine zipper motif 60	scaffold_5:43068092-43070554	113.474	123.015	0.92244	0.746179	1
Ciclev10002007m.g	AT1G09140.1	SERINE-ARGININE PROTEIN 30	scaffold_5:33391428-33396907	68.4318	82.1297	0.833216	0.417279	0.998972
Ciclev10002008m.g	AT1G54740.1	Protein of unknown function (DUF3049)	scaffold_5:31911886-31914892	6.35019	1.52254	4.17079	0.102907	0.451001
Ciclev10002009m.g	AT1G75860.1		scaffold_5:42125534-42127625	234.542	132.508	1.77002	1.07e-08	3.57e-07
Ciclev10002010m.g	AT1G02070.1		scaffold_5:35827903-35830008	7.45242	13.4152	0.555521	0.288406	0.843093
Ciclev10002011m.g	AT5G27830.5		scaffold_5:33416340-33422684	42.5461	81.4138	0.522591	0.00120043	0.0137748
Ciclev10002020m.g	AT3G05410.2	Photosystem II reaction center PsbP family protein	scaffold_5:33225099-33232451	3.04173	4.08715	0.744218	1	1
Ciclev10002021m.g	AT1G76010.1	Alba DNA/RNA-binding protein	scaffold_5:19581298-19585262	5.90061	8.20678	0.718992	0.608335	1
Ciclev10002023m.g	AT1G75000.1	GNS1/SUR4 membrane protein family	scaffold_5:40740373-40741597	2.87095	1.1283	2.54449	0.681506	1
Ciclev10002024m.g	AT1G27450.1	adenine phosphoribosyl transferase 1	scaffold_5:34558361-34564638	242.485	196.697	1.23278	0.00994064	0.0776244
Ciclev10002025m.g	AT2G02570.1	nucleic acid binding;RNA binding	scaffold_5:871875-875378	45.9195	61.0748	0.751857	0.210716	0.710016
Ciclev10002026m.g	AT1G09610.1	Protein of unknown function (DUF579)	scaffold_5:2485965-2487075	0.494512	0.184717	2.67713	1	1
Ciclev10002029m.g	AT1G03970.1	G-box binding factor 4	scaffold_5:19149152-19154358	113.697	77.9736	1.45815	0.00474801	0.0432731
Ciclev10002031m.g	AT4G19400.1	Profilin family protein	scaffold_5:29120015-29123637	2.8595	3.05579	0.935765	1	1
Ciclev10002035m.g	AT2G02500.1	Nucleotide-diphospho-sugar transferases superfamily protein	scaffold_5:420506-424076	46.8125	74.5133	0.628244	0.0232858	0.151163
Ciclev10002036m.g	AT1G09660.1	RNA-binding KH domain-containing protein	scaffold_5:4452142-4458033	25.1192	35.8974	0.69975	0.309761	0.874615
Ciclev10002041m.g	AT4G19390.1	Uncharacterised protein family (UPF0114)	scaffold_5:40637572-40639211	3.62075	3.54877	1.02028	1	1
Ciclev10002047m.g	AT4G31050.1	Biotin/lipoate A/B protein ligase family	scaffold_5:40631967-40634597	8.45819	14.2682	0.5928	0.309785	0.873791
Ciclev10002048m.g	AT4G19140.1		scaffold_5:28797134-28801282	15.6201	24.7481	0.631164	0.214758	0.71702
Ciclev10002050m.g	AT3G54380.1	SAC3/GANP/Nin1/mts3/eIF-3 p25 family	scaffold_5:19780297-19783698	8.47386	11.3231	0.748369	0.664964	1
Ciclev10002052m.g	AT1G12280.1	LRR and NB-ARC domains-containing disease resistance protein	scaffold_5:31669622-31670669	2.39105	1.28905	1.85489	0.681506	1
Ciclev10002053m.g	AT1G31460.1		scaffold_5:28826545-28827698	0.276486	1.23214	0.224395	1	1
Ciclev10002054m.g	AT1G13700.1	6-phosphogluconolactonase 1	scaffold_5:36978026-36980013	3.2446	1.56893	2.06803	0.444228	1
Ciclev10002056m.g	AT4G24470.3	GATA-type zinc finger protein with TIFY domain	scaffold_5:35449778-35453908	21.437	19.0826	1.12338	0.758061	1
Ciclev10002058m.g	AT4G20820.1	FAD-binding Berberine family protein	scaffold_5:5260411-5262567	1.55014	4.15579	0.373007	0.453779	1
Ciclev10002059m.g	AT5G44080.1	Basic-leucine zipper (bZIP) transcription factor family protein	scaffold_5:38743042-38746428	46.8522	30.2765	1.54748	0.053797	0.287125
Ciclev10002064m.g	AT1G71190.1	senescence associated gene 18	scaffold_5:9456036-9459483	17.9635	21.7452	0.82609	0.638534	1
Ciclev10002065m.g	AT2G02360.1	phloem protein 2-B10	scaffold_5:7333770-7335331	1e-05	0.36233	2.76e-05	1	1
Ciclev10002066m.g	AT1G77700.1	Pathogenesis-related thaumatin superfamily protein	scaffold_5:11336688-11346938	2.00821	1.05796	1.89819	0.681506	1
Ciclev10002068m.g	AT4G09460.1	myb domain protein 6	scaffold_5:39300390-39301722	0.503562	0.783715	0.642532	1	1
Ciclev10002069m.g	AT1G77700.1	Pathogenesis-related thaumatin superfamily protein	scaffold_5:37100833-37102074	1e-05	0.228733	4.37e-05	1	1
Ciclev10002074m.g	AT1G09155.1	phloem protein 2-B15	scaffold_5:33745670-33747052	1e-05	0.198894	5.03e-05	1	1
Ciclev10002075m.g	AT3G57720.1	Protein kinase superfamily protein	scaffold_5:32973613-32974814	4.86695	2.27461	2.13969	0.499686	1
Ciclev10002076m.g	AT3G53270.1	Small nuclear RNA activating complex (SNAPc), subunit SNAP43 protein	scaffold_5:34056983-34059875	15.2622	18.3116	0.833472	0.737665	1
Ciclev10002077m.g	AT2G21940.4	shikimate kinase 1	scaffold_5:39227920-39237745	45.1892	23.8567	1.89419	0.00571364	0.05062
Ciclev10002078m.g	AT3G14880.2		scaffold_5:15672232-15673272	0.685939	0.543086	1.26304	1	1
Ciclev10002080m.g	AT1G75170.1	Sec14p-like phosphatidylinositol transfer family protein	scaffold_5:41000993-41003992	49.8656	66.0444	0.755031	0.195472	0.68081
Ciclev10002081m.g	AT3G12480.1	nuclear factor Y, subunit C11	scaffold_5:20377551-20384333	41.949	40.8965	1.02574	0.82647	1
Ciclev10002083m.g	AT1G35460.1	basic helix-loop-helix (bHLH) DNA-binding superfamily protein	scaffold_5:39748753-39753073	17.5381	35.9168	0.488298	0.0284771	0.176346
Ciclev10002084m.g	AT3G17380.1	TRAF-like family protein	scaffold_5:7366267-7368258	2.07569	2.90898	0.713546	1	1
Ciclev10002089m.g	AT5G45580.1	Homeodomain-like superfamily protein	scaffold_5:25793407-25795877	9.09048	5.0263	1.80858	0.324014	0.900024
Ciclev10002090m.g	AT4G31790.1	Tetrapyrrole (Corrin/Porphyrin) Methylases	scaffold_5:41844983-41847835	14.065	14.7669	0.952468	1	1
Ciclev10002092m.g	AT4G09580.1	SNARE associated Golgi protein family	scaffold_5:39423966-39427964	25.1861	17.1617	1.46758	0.227382	0.739525
Ciclev10002098m.g	AT1G34750.1	Protein phosphatase 2C family protein	scaffold_5:36361964-36366774	95.4148	76.984	1.23941	0.0943056	0.424946
Ciclev10002099m.g	AT1G44575.1	Chlorophyll A-B binding family protein	scaffold_5:37399361-37401461	980.189	1911.08	0.512898	2e-60	7.05e-58
Ciclev10002100m.g	AT5G27490.1	Integral membrane Yip1 family protein	scaffold_5:32903812-32907034	62.8208	38.229	1.64328	0.0100345	0.0782309
Ciclev10002101m.g	AT1G75460.1	ATP-dependent protease La (LON) domain protein	scaffold_5:41439979-41441315	10.1866	11.5631	0.880958	1	1
Ciclev10002103m.g			scaffold_5:1332522-1335656	2.19845	4.38151	0.501756	0.726999	1
Ciclev10002104m.g	AT5G64460.1	Phosphoglycerate mutase family protein	scaffold_5:35199631-35201386	0.783932	1e-05	78393.2	1	1
Ciclev10002106m.g	AT1G21326.1	VQ motif-containing protein	scaffold_5:38469257-38470252	4.94898	4.04358	1.22391	1	1
Ciclev10002108m.g	AT4G15510.2	Photosystem II reaction center PsbP family protein	scaffold_5:34239480-34244107	14.8127	29.2776	0.50594	0.0373441	0.21735
Ciclev10002109m.g	AT1G44770.1		scaffold_5:37267094-37269707	65.0892	67.6179	0.962603	1	1
Ciclev10002110m.g	AT1G47250.1	20S proteasome alpha subunit F2	scaffold_5:41177873-41181556	45.0578	46.5706	0.967516	1	1
Ciclev10002111m.g	AT5G41270.1		scaffold_5:21187557-21191341	7.16754	7.70112	0.930714	1	1
Ciclev10002112m.g	AT2G46170.1	Reticulon family protein	scaffold_5:13903638-13915539	15.0304	9.53587	1.5762	0.240684	0.762672
Ciclev10002113m.g	AT4G08455.1	BTB/POZ domain-containing protein	scaffold_5:37901759-37903874	15.4887	32.9799	0.469641	0.0225519	0.147387
Ciclev10002114m.g	AT1G10310.1	NAD(P)-binding Rossmann-fold superfamily protein	scaffold_5:1474395-1479079	27.1848	60.7775	0.447284	0.000939407	0.0111839
Ciclev10002116m.g	AT1G32120.1		scaffold_5:24806463-24809020	72.1074	46.7554	1.54223	0.0103941	0.080131
Ciclev10002117m.g	AT1G17020.1	senescence-related gene 1	scaffold_5:29226488-29228147	9.14221	15.1308	0.604212	0.329462	0.908509
Ciclev10002119m.g	AT2G47730.1	glutathione S-transferase phi 8	scaffold_5:42348092-42350470	21.2056	40.648	0.521689	0.0314287	0.191079
Ciclev10002120m.g	AT1G02410.1	cytochrome c oxidase assembly protein CtaG / Cox11 family	scaffold_5:26620636-26625312	20.8593	28.4344	0.733594	0.396283	0.974869
Ciclev10002125m.g	AT1G61190.1	LRR and NB-ARC domains-containing disease resistance protein	scaffold_5:30145434-30148875	0.387637	0.600496	0.645528	1	1
Ciclev10002126m.g	AT1G10890.1		scaffold_5:9968989-9975353	26.867	14.6504	1.83387	0.0628077	0.320124
Ciclev10002129m.g	AT1G61520.1	photosystem I light harvesting complex gene 3	scaffold_5:6680053-6681731	48.7409	118.845	0.410122	2.48e-07	6.69e-06
Ciclev10002130m.g	AT2G01080.1	Late embryogenesis abundant (LEA) hydroxyproline-rich glycoprotein family	scaffold_5:19593651-19596385	2.72675	1.89195	1.44124	0.681506	1
Ciclev10002132m.g	AT1G20930.1	cyclin-dependent kinase B2;2	scaffold_5:43051578-43053394	4.75438	4.09301	1.16159	1	1
Ciclev10002134m.g	AT5G58250.1		scaffold_5:13903638-13915539	148.829	228.279	0.651961	0.000204103	0.00295736
Ciclev10002135m.g	AT3G04790.1	Ribose 5-phosphate isomerase, type A protein	scaffold_5:29706687-29710388	69.6645	60.757	1.14661	0.336669	0.911374
Ciclev10002136m.g	AT1G21610.3	wound-responsive family protein	scaffold_5:16091034-16094760	5.42561	4.84532	1.11976	0.770362	1
Ciclev10002139m.g	AT1G28200.1	FH interacting protein 1	scaffold_5:35852523-35856135	22.1451	19.041	1.16302	0.647824	1
Ciclev10002140m.g	AT2G13440.1	glucose-inhibited division family A protein	scaffold_5:16437202-16440179	9.23624	8.73414	1.05749	0.820924	1
Ciclev10002141m.g	AT4G02610.1	Aldolase-type TIM barrel family protein	scaffold_5:8300864-8301824	0.148269	0.164801	0.899685	1	1
Ciclev10002142m.g	AT4G17030.1	expansin-like B1	scaffold_5:1443599-1445440	31.0874	27.1368	1.14558	0.520979	1
Ciclev10002145m.g	AT3G05250.1	RING/U-box superfamily protein	scaffold_5:32731404-32733551	8.99122	9.38534	0.958007	1	1
Ciclev10002147m.g	AT1G75760.1	ER lumen protein retaining receptor family protein	scaffold_5:41925903-41928598	37.2577	35.5682	1.0475	0.727927	1
Ciclev10002148m.g	AT1G04940.1	translocon at the inner envelope membrane of chloroplasts 20	scaffold_5:41337992-41344179	47.4878	73.0967	0.649657	0.0369757	0.21566
Ciclev10002150m.g	AT4G33350.1	Tic22-like family protein	scaffold_5:40226351-40230560	23.5804	26.1603	0.901381	0.888797	1
Ciclev10002151m.g	AT1G32050.1	SCAMP family protein	scaffold_5:25868373-25873791	40.4485	59.7998	0.676399	0.110834	0.471854
Ciclev10002153m.g	AT1G76070.1		scaffold_5:42291779-42292947	36.3789	83.2364	0.437055	5.29e-05	0.000891633
Ciclev10002154m.g	AT1G47720.1	Primosome PriB/single-strand DNA-binding	scaffold_5:40487889-40490483	8.32601	7.1782	1.1599	0.811424	1
Ciclev10002155m.g	AT1G19580.1	gamma carbonic anhydrase 1	scaffold_5:41169401-41173804	26.3792	38.3365	0.688096	0.218339	0.71759
Ciclev10002156m.g	AT5G01380.1	Homeodomain-like superfamily protein	scaffold_5:27831223-27833396	9.29216	2.70322	3.43744	0.0530682	0.28528
Ciclev10002157m.g	AT3G17380.1	TRAF-like family protein	scaffold_5:27223605-27225474	0.126172	0.142038	0.888297	1	1
Ciclev10002160m.g	AT1G44000.1		scaffold_5:38044495-38047499	2.48274	4.36098	0.569308	0.726999	1
Ciclev10002163m.g	AT1G77930.1	Chaperone DnaJ-domain superfamily protein	scaffold_5:36827104-36829909	16.7269	28.3732	0.589532	0.106969	0.461697
Ciclev10002166m.g	AT1G77290.1	Glutathione S-transferase family protein	scaffold_5:37834085-37836138	6.50319	8.97619	0.724493	0.804245	1
Ciclev10002167m.g	AT5G43140.1	Peroxisomal membrane 22 kDa (Mpv17/PMP22) family protein	scaffold_5:34516142-34519012	8.99329	11.4046	0.788567	0.664964	1
Ciclev10002169m.g	AT4G38260.1	Protein of unknown function (DUF833)	scaffold_5:42790656-42792286	1.3601	1.37847	0.986674	1	1
Ciclev10002171m.g	AT4G10360.1	TRAM, LAG1 and CLN8 (TLC) lipid-sensing domain containing protein	scaffold_5:14813784-14820676	8.25672	21.3476	0.386775	0.0304402	0.186652
Ciclev10002177m.g	AT1G55000.1	peptidoglycan-binding LysM domain-containing protein	scaffold_5:32970438-32972234	9.0583	7.18815	1.26017	0.642083	1
Ciclev10002178m.g	AT1G45474.1	photosystem I light harvesting complex gene 5	scaffold_5:40200372-40208310	41.9654	85.7355	0.489475	0.00026121	0.00369088
Ciclev10002179m.g	AT1G21340.1	Dof-type zinc finger DNA-binding family protein	scaffold_5:38447705-38448556	2.51473	0.838287	2.99984	0.365306	0.957432
Ciclev10002180m.g	AT3G03990.1	alpha/beta-Hydrolases superfamily protein	scaffold_5:34619621-34621368	5.58335	5.77819	0.96628	1	1
Ciclev10002181m.g			scaffold_5:9690675-9693018	0.206226	0.0772327	2.67019	1	1
Ciclev10002182m.g	AT5G65310.1	homeobox protein 5	scaffold_5:36068744-36070255	5.60537	36.8356	0.152173	1.95e-06	4.43e-05
Ciclev10002183m.g	AT4G27950.1	cytokinin response factor 4	scaffold_5:15208665-15210042	3.52375	2.8343	1.24325	0.721429	1
Ciclev10002186m.g	AT1G34760.1	general regulatory factor 11	scaffold_5:36352562-36356244	136.725	130.648	1.04651	0.501884	1
Ciclev10002190m.g	AT4G33460.1	ABC transporter family protein	scaffold_5:17895311-17898301	13.3035	25.6775	0.5181	0.0830998	0.389786
Ciclev10002192m.g	AT5G05800.1		scaffold_5:29352307-29354378	1.59964	3.67867	0.434842	0.687874	1
Ciclev10002193m.g	AT1G08970.1	nuclear factor Y, subunit C9	scaffold_5:32699552-32702689	72.9574	94.7158	0.770277	0.164779	0.612362
Ciclev10002194m.g	AT1G44920.1		scaffold_5:34801351-34804440	66.5302	125.342	0.530789	6.9e-05	0.00112872
Ciclev10002195m.g	AT1G75560.1	zinc knuckle (CCHC-type) family protein	scaffold_5:41568008-41571721	8.64597	5.59008	1.54666	0.446636	1
Ciclev10002196m.g	AT3G05345.1	Chaperone DnaJ-domain superfamily protein	scaffold_5:32934959-32937034	12.4217	18.7372	0.662943	0.380145	0.953466
Ciclev10002200m.g	AT1G56423.1		scaffold_5:34023980-34026191	25.7666	25.85	0.996774	0.890775	1
Ciclev10002202m.g	AT1G75510.1	Transcription initiation factor IIF, beta subunit	scaffold_5:41492324-41495372	46.5433	63.8571	0.728866	0.183653	0.649701
Ciclev10002204m.g	AT5G24560.1	phloem protein 2-B12	scaffold_5:8159378-8161299	75.8114	93.4235	0.811481	0.283013	0.832861
Ciclev10002205m.g	AT1G68810.1	basic helix-loop-helix (bHLH) DNA-binding superfamily protein	scaffold_5:35659719-35661331	3.70722	2.5794	1.43724	0.721429	1
Ciclev10002208m.g	AT2G22800.1	Homeobox-leucine zipper protein family	scaffold_5:34896600-34897733	1.26006	2.06029	0.611594	1	1
Ciclev10002209m.g	AT4G09350.1	Chaperone DnaJ-domain superfamily protein	scaffold_5:39275626-39277055	35.2726	44.44	0.793713	0.437927	1
Ciclev10002211m.g	AT1G47750.1	peroxin 11A	scaffold_5:40846791-40847806	8.73899	6.73005	1.2985	0.623141	1
Ciclev10002214m.g	AT1G71790.1	Subunits of heterodimeric actin filament capping protein Capz superfamily	scaffold_5:39200806-39203977	5.94366	9.08724	0.654067	0.455959	1
Ciclev10002215m.g	AT5G45390.1	CLP protease P4	scaffold_5:28815313-28816638	36.1211	33.9862	1.06282	0.635976	1
Ciclev10002216m.g	AT5G08770.1		scaffold_5:15695397-15699548	7.06976	12.7052	0.556446	0.385321	0.961093
Ciclev10002218m.g	AT5G28020.1	cysteine synthase D2	scaffold_5:30677509-30679699	3.78379	5.26812	0.718243	0.754397	1
Ciclev10002220m.g	AT1G14290.1	sphingoid base hydroxylase 2	scaffold_5:39207052-39212539	12.148	12.3395	0.984481	1	1
Ciclev10002221m.g	AT1G19990.1		scaffold_5:41936718-41940030	16.9554	19.5667	0.866544	0.74467	1
Ciclev10002223m.g	AT1G43130.1	like COV 2	scaffold_5:38882563-38886957	16.7445	19.1798	0.873028	0.74467	1
Ciclev10002226m.g	AT3G58130.1	N-acetylglucosaminylphosphatidylinositol de-N-acetylase family protein	scaffold_5:42675741-42682366	8.85158	8.60012	1.02924	1	1
Ciclev10002227m.g	AT1G76010.1	Alba DNA/RNA-binding protein	scaffold_5:42249317-42252520	97.9325	83.9092	1.16712	0.207536	0.707927
Ciclev10002228m.g	AT1G77090.1	Mog1/PsbP/DUF1795-like photosystem II reaction center PsbP family protein	scaffold_5:38275765-38277786	10.9344	20.0682	0.544862	0.112449	0.474453
Ciclev10002229m.g	AT4G17650.1	Polyketide cyclase / dehydrase and lipid transport protein	scaffold_5:40166638-40169559	12.1511	12.8811	0.943328	1	1
Ciclev10002231m.g	AT1G59590.1	ZCF37	scaffold_5:34665210-34666402	10.3921	31.051	0.334678	0.00208249	0.0217672
Ciclev10002237m.g	AT5G66940.1	Dof-type zinc finger DNA-binding family protein	scaffold_5:40544379-40545372	1.07857	1.90475	0.566253	1	1
Ciclev10002239m.g	AT3G50060.1	myb domain protein 77	scaffold_5:40449646-40450911	93.8176	137.089	0.684355	0.0103396	0.0797427
Ciclev10002241m.g	AT1G54850.1	HSP20-like chaperones superfamily protein	scaffold_5:32710797-32712084	0.0960903	0.107107	0.897143	1	1
Ciclev10002244m.g	AT5G64010.1		scaffold_5:17058859-17070837	7.3708	9.73512	0.757135	0.815194	1
Ciclev10002246m.g	AT4G19390.1	Uncharacterised protein family (UPF0114)	scaffold_5:29196959-29199955	40.804	48.1131	0.848085	0.52875	1
Ciclev10002251m.g	AT1G21320.2	nucleotide binding;nucleic acid binding	scaffold_5:38514269-38516995	64.0673	66.9776	0.956548	1	1
Ciclev10002254m.g	AT5G65430.1	general regulatory factor 8	scaffold_5:35776945-35780088	89.1926	84.1109	1.06042	0.545634	1
Ciclev10002260m.g	AT2G02470.1	alfin-like 6	scaffold_5:406519-410924	54.4417	43.0747	1.26389	0.227516	0.738968
Ciclev10002261m.g	AT1G21350.3	Thioredoxin superfamily protein	scaffold_5:38420274-38423903	31.3253	46.9286	0.66751	0.143873	0.558583
Ciclev10002263m.g	AT1G09580.1	emp24/gp25L/p24 family/GOLD family protein	scaffold_5:9979514-9982669	29.1789	31.0357	0.940172	1	1
Ciclev10002265m.g	AT4G09730.1	RH39	scaffold_5:39150564-39152662	5.99828	6.72802	0.891537	1	1
Ciclev10002266m.g	AT5G64200.1	ortholog of human splicing factor SC35	scaffold_5:36441612-36445735	38.5728	36.1157	1.06803	0.731308	1
Ciclev10002267m.g	AT1G48560.1		scaffold_5:19690722-19691804	0.161034	0.181639	0.886561	1	1
Ciclev10002268m.g	AT5G27390.1	Mog1/PsbP/DUF1795-like photosystem II reaction center PsbP family protein	scaffold_5:31877029-31880023	8.634	13.162	0.655979	0.407046	0.992144
Ciclev10002270m.g	AT1G61190.1	LRR and NB-ARC domains-containing disease resistance protein	scaffold_5:31610908-31612688	0.0841457	1e-05	8414.57	1	1
Ciclev10002272m.g	AT1G22750.1		scaffold_5:39163271-39168399	25.7941	44.7832	0.575977	0.0430815	0.242786
Ciclev10002276m.g	AT1G21460.1	Nodulin MtN3 family protein	scaffold_5:38253834-38255589	0.355274	0.398471	0.891593	1	1
Ciclev10002279m.g	AT1G27590.1		scaffold_5:35108545-35113815	8.66509	3.14193	2.75789	0.171891	0.626171
Ciclev10002280m.g	AT1G75490.1	Integrase-type DNA-binding superfamily protein	scaffold_5:41461922-41463141	1e-05	0.189579	5.27e-05	1	1
Ciclev10002282m.g	AT1G77160.1	Protein of unknown function (DUF506)	scaffold_5:38388921-38389958	0.787132	3.38787	0.232338	0.375499	0.961622
Ciclev10002284m.g	AT1G47740.1	PPPDE putative thiol peptidase family protein	scaffold_5:40856398-40860211	9.38628	15.5066	0.605309	0.329462	0.908509
Ciclev10002288m.g	AT1G75030.1	thaumatin-like protein 3	scaffold_5:40752810-40753702	1e-05	0.356573	2.8e-05	1	1
Ciclev10002290m.g	AT3G04730.1	indoleacetic acid-induced protein 16	scaffold_5:29400845-29403554	107.713	128.224	0.840038	0.299084	0.856712
Ciclev10002292m.g	AT1G21000.1	PLATZ transcription factor family protein	scaffold_5:43127571-43129737	14.6471	34.1624	0.428749	0.00713473	0.0597897
Ciclev10002294m.g	AT1G21910.1	Integrase-type DNA-binding superfamily protein	scaffold_5:37219889-37221066	3.31034	4.70088	0.704196	1	1
Ciclev10002295m.g	AT1G21840.1	urease accessory protein F	scaffold_5:20932326-20934070	14.385	17.2079	0.835953	0.730062	1
Ciclev10002297m.g	AT1G27730.1	salt tolerance zinc finger	scaffold_5:34552215-34553382	352.454	475.838	0.740702	0.000226477	0.00324031
Ciclev10002300m.g	AT1G31360.1	RECQ helicase L2	scaffold_5:27798445-27803446	10.8679	15.3101	0.709852	0.444544	1
Ciclev10002301m.g	AT1G21830.1		scaffold_5:37372295-37374350	12.3506	16.4707	0.749853	0.586929	1
Ciclev10002302m.g	AT4G15920.1	Nodulin MtN3 family protein	scaffold_5:33432127-33434510	13.0418	15.9728	0.816501	0.856398	1
Ciclev10002303m.g	AT1G21065.1		scaffold_5:43186617-43188986	55.4628	59.5841	0.930832	0.926096	1
Ciclev10002305m.g	AT5G42765.1		scaffold_5:41037880-41041106	12.9704	10.0647	1.2887	0.685477	1
Ciclev10002306m.g	AT1G21090.1	Cupredoxin superfamily protein	scaffold_5:38738186-38739919	1e-05	0.263086	3.8e-05	1	1
Ciclev10002308m.g	AT3G26070.1	Plastid-lipid associated protein PAP / fibrillin family protein	scaffold_5:12201835-12206033	23.2508	33.4736	0.694601	0.293469	0.844378
Ciclev10002309m.g	AT4G07990.1	Chaperone DnaJ-domain superfamily protein	scaffold_5:34843503-34848399	44.2654	32.2167	1.37399	0.14093	0.548917
Ciclev10002310m.g	AT1G09935.1	Phosphoglycerate mutase family protein	scaffold_5:35212376-35214385	0.0910289	1e-05	9102.89	1	1
Ciclev10002311m.g	AT1G47420.1	succinate dehydrogenase 5	scaffold_5:40300305-40304768	18.6348	19.3797	0.961563	1	1
Ciclev10002312m.g	AT3G57040.1	response regulator 9	scaffold_5:37491104-37493595	1e-05	0.355765	2.81e-05	1	1
Ciclev10002314m.g	AT5G42700.1	AP2/B3-like transcriptional factor family protein	scaffold_5:40275057-40277774	16.3472	11.5873	1.41079	0.354664	0.938821
Ciclev10002321m.g	AT5G49710.3		scaffold_5:35738600-35741540	163.188	161.692	1.00925	0.657778	1
Ciclev10002322m.g	AT2G28605.1	Photosystem II reaction center PsbP family protein	scaffold_5:16010186-16014514	8.73309	15.6436	0.558253	0.231853	0.745549
Ciclev10002323m.g	AT1G34770.1		scaffold_5:36347985-36351111	15.4268	28.8696	0.534361	0.0750076	0.363727
Ciclev10002326m.g	AT1G78780.2	pathogenesis-related family protein	scaffold_5:38401026-38402507	18.4414	22.5172	0.818992	0.646756	1
Ciclev10002332m.g	AT1G20225.1	Thioredoxin superfamily protein	scaffold_5:42254118-42255871	197.523	234.281	0.843103	0.178432	0.641667
Ciclev10002333m.g			scaffold_5:39072335-39073558	4.9036	7.85701	0.624105	0.582057	1
Ciclev10002336m.g	AT5G42680.1	Protein of unknown function, DUF617	scaffold_5:40443226-40444140	1.95357	1.87536	1.0417	1	1
Ciclev10002337m.g	AT5G49800.1	Polyketide cyclase/dehydrase and lipid transport superfamily protein	scaffold_5:282609-284150	0.223712	0.49793	0.449284	1	1
Ciclev10002343m.g	AT5G42270.1	FtsH extracellular protease family	scaffold_5:42222977-42226094	19.1746	19.3819	0.989304	1	1
Ciclev10002344m.g	AT5G59470.1	Mannose-P-dolichol utilization defect 1 protein	scaffold_5:39893322-39895874	122.083	240.601	0.507409	6.19e-09	2.18e-07
Ciclev10002345m.g	AT1G11400.1	partner of Y14-MAGO	scaffold_5:12174213-12181845	13.825	13.1313	1.05283	1	1
Ciclev10002346m.g	AT3G12490.2	cystatin B	scaffold_5:20384811-20387339	69.2533	84.7288	0.817353	0.376899	0.954602
Ciclev10002349m.g	AT1G20450.1	Dehydrin family protein	scaffold_5:42489683-42491501	121.118	33.6707	3.59713	1.08e-13	6.35e-12
Ciclev10002350m.g	AT2G16370.1	thymidylate synthase 1	scaffold_5:41252803-41257611	1.86464	1.71068	1.09	1	1
Ciclev10002351m.g	AT4G09650.1	ATP synthase delta-subunit gene	scaffold_5:39619674-39620810	89.5795	95.3655	0.939328	0.8836	1
Ciclev10002352m.g	AT1G75670.1	DNA-directed RNA polymerases	scaffold_5:41735342-41738372	13.677	26.0342	0.525347	0.0616576	0.316596
Ciclev10002354m.g	AT4G35550.1	WUSCHEL related homeobox 13	scaffold_5:42809559-42821401	11.9126	21.5828	0.551949	0.12397	0.50629
Ciclev10002355m.g	AT4G24660.1	homeobox protein 22	scaffold_5:35847755-35849138	10.9448	15.4586	0.708007	0.444544	1
Ciclev10002356m.g	AT2G38730.1	Cyclophilin-like peptidyl-prolyl cis-trans isomerase family protein	scaffold_5:21354053-21361949	65.586	64.6441	1.01457	0.793407	1
Ciclev10002359m.g	AT5G49940.1	NIFU-like protein 2	scaffold_5:6440801-6444240	351.848	245.455	1.43345	1.58e-06	3.65e-05
Ciclev10002360m.g			scaffold_5:17549352-17550928	30.6167	49.4805	0.618763	0.0587717	0.307155
Ciclev10002361m.g	AT2G30260.1	U2 small nuclear ribonucleoprotein B	scaffold_5:12704907-12708437	34.9727	44.1669	0.791831	0.372215	0.954856
Ciclev10002362m.g	AT3G54420.1	homolog of carrot EP3-3 chitinase	scaffold_5:24760556-24761990	27.2933	64.3725	0.42399	0.00025315	0.00359009
Ciclev10002365m.g	AT3G12210.2	DNA binding	scaffold_5:34822162-34825886	21.5572	21.4154	1.00662	1	1
Ciclev10002366m.g	AT2G38695.2		scaffold_5:19775138-19779139	13.5803	15.3414	0.885206	0.856398	1
Ciclev10002367m.g	AT1G19310.1	RING/U-box superfamily protein	scaffold_5:40735855-40737496	95.3227	60.9921	1.56287	0.00237395	0.0241868
Ciclev10002369m.g	AT5G42770.2	Maf-like protein	scaffold_5:41077761-41081130	35.8819	50.5824	0.709375	0.164271	0.611176
Ciclev10002374m.g	AT1G47640.1		scaffold_5:40559956-40563236	34.6157	63.3796	0.546165	0.00659717	0.0560123
Ciclev10002376m.g	AT1G25260.1	Ribosomal protein L10 family protein	scaffold_5:12183280-12186007	36.8925	47.6103	0.774885	0.330332	0.908062
Ciclev10002377m.g	AT1G45230.1	Protein of unknown function (DUF3223)	scaffold_5:40148351-40150388	10.9289	24.3717	0.448426	0.029953	0.184132
Ciclev10002378m.g	AT5G07020.1	proline-rich family protein	scaffold_5:20818485-20821238	160.883	233.854	0.687963	0.00105514	0.0123566
Ciclev10002383m.g	AT2G28305.1	Putative lysine decarboxylase family protein	scaffold_5:41829633-41831556	2.72277	0.916663	2.97031	0.365306	0.957432
Ciclev10002385m.g	AT1G36940.1		scaffold_5:36892920-36894344	0.365403	1.63302	0.223759	1	1
Ciclev10002388m.g	AT1G35180.1	TRAM, LAG1 and CLN8 (TLC) lipid-sensing domain containing protein	scaffold_5:41350378-41351840	0.113019	0.250705	0.450805	1	1
Ciclev10002389m.g	AT5G63880.1	SNF7 family protein	scaffold_5:16056455-16060841	26.437	36.5715	0.722885	0.317538	0.888024
Ciclev10002390m.g	AT1G49510.1	embryo defective 1273	scaffold_5:34866518-34875003	1.83637	3.80327	0.48284	0.687874	1
Ciclev10002391m.g	AT1G19330.2		scaffold_5:40812421-40815992	2.12352	6.0571	0.350584	0.344732	0.927493
Ciclev10002392m.g	AT3G04890.2	Uncharacterized conserved protein (DUF2358)	scaffold_5:30544606-30548285	7.05183	15.5297	0.454087	0.153548	0.583964
Ciclev10002394m.g	AT5G37475.1	Translation initiation factor eIF3 subunit	scaffold_5:15991107-15996585	40.177	25.0174	1.60596	0.0505184	0.273855
Ciclev10002395m.g	AT1G17860.1	Kunitz family trypsin and protease inhibitor protein	scaffold_5:17289722-17290702	69.0743	47.6222	1.45046	0.0269663	0.169265
Ciclev10002396m.g	AT1G09250.1	basic helix-loop-helix (bHLH) DNA-binding superfamily protein	scaffold_5:34161720-34162652	68.8831	17.7134	3.88876	8.72e-09	3e-07
Ciclev10002397m.g			scaffold_5:35651952-35654845	4.49009	8.71544	0.515188	0.425266	1
Ciclev10002398m.g	AT3G43660.1	Vacuolar iron transporter (VIT) family protein	scaffold_5:38579085-38579793	0.162152	1.60902	0.100777	1	1
Ciclev10002399m.g	AT4G24380.1		scaffold_5:35880150-35882429	35.2996	27.6534	1.2765	0.262195	0.802208
Ciclev10002401m.g	AT1G35680.1	Ribosomal protein L21	scaffold_5:39421060-39423811	110.098	124.187	0.88655	0.558407	1
Ciclev10002404m.g	AT4G03520.1	Thioredoxin superfamily protein	scaffold_5:38189668-38190638	69.3182	184.588	0.375529	2.68e-12	1.4e-10
Ciclev10002405m.g	AT4G35190.1	Putative lysine decarboxylase family protein	scaffold_5:42530863-42532444	10.4395	8.69517	1.20061	0.658454	1
Ciclev10002406m.g	AT2G29420.1	glutathione S-transferase tau 7	scaffold_5:35913858-35917123	93.6993	142.326	0.658343	0.00419391	0.0387892
Ciclev10002407m.g	AT1G59960.1	NAD(P)-linked oxidoreductase superfamily protein	scaffold_5:487606-489458	0.522975	1e-05	52297.5	1	1
Ciclev10002409m.g	AT3G17380.1	TRAF-like family protein	scaffold_5:27212726-27215391	22.232	10.2092	2.17764	0.0382699	0.220945
Ciclev10002412m.g	AT1G75690.1	DnaJ/Hsp40 cysteine-rich domain superfamily protein	scaffold_5:41850269-41852717	18.4658	31.7629	0.581364	0.122564	0.501712
Ciclev10002413m.g	AT4G17390.1	Ribosomal protein L23/L15e family protein	scaffold_5:2189583-2190474	117.286	108.611	1.07987	0.388344	0.964161
Ciclev10002415m.g	AT5G48930.1	hydroxycinnamoyl-CoA shikimate/quinate hydroxycinnamoyl transferase	scaffold_5:29768090-29769281	11.6608	4.29392	2.71565	0.0906998	0.413608
Ciclev10002416m.g	AT1G78170.1		scaffold_5:36427010-36428163	3.26246	1.36701	2.38657	0.444228	1
Ciclev10002417m.g	AT4G24210.1	F-box family protein	scaffold_5:39818783-39820264	5.57193	7.79634	0.714685	0.791112	1
Ciclev10002418m.g	AT3G05700.1	Drought-responsive family protein	scaffold_5:33846261-33853353	154.936	169.778	0.91258	0.657312	1
Ciclev10002419m.g	AT1G26910.1	Ribosomal protein L16p/L10e family protein	scaffold_5:15052797-15054938	121.952	137.77	0.885185	0.535141	1
Ciclev10002424m.g	AT1G20810.1	FKBP-like peptidyl-prolyl cis-trans isomerase family protein	scaffold_5:42898493-42904653	35.3105	36.4382	0.969052	1	1
Ciclev10002425m.g	AT3G21570.1		scaffold_5:42093830-42095266	0.78145	0.679408	1.15019	1	1
Ciclev10002428m.g	AT3G46940.1	DUTP-PYROPHOSPHATASE-LIKE 1	scaffold_5:40969733-40971025	12.2776	21.0925	0.582084	0.178479	0.641002
Ciclev10002429m.g	AT5G58260.1	oxidoreductases, acting on NADH or NADPH, quinone or similar compound as acceptor	scaffold_5:14956022-14957263	45.3241	54.8684	0.826051	0.550617	1
Ciclev10002430m.g	AT1G76600.1		scaffold_5:43134799-43135657	9.28292	58.4375	0.158852	3.26e-09	1.2e-07
Ciclev10002431m.g			scaffold_5:38812677-38813954	0.33276	0.429167	0.775363	1	1
Ciclev10002432m.g	AT1G72860.1	Disease resistance protein (TIR-NBS-LRR class) family	scaffold_5:7242375-7246665	6.5385	4.81682	1.35743	0.574186	1
Ciclev10002433m.g	AT1G71970.1		scaffold_5:39379288-39380137	1.46332	0.816881	1.79135	0.617655	1
Ciclev10002435m.g	AT1G20050.1	C-8,7 sterol isomerase	scaffold_5:29398393-29399900	0.90493	1.0106	0.895438	1	1
Ciclev10002438m.g	AT1G46480.1	WUSCHEL related homeobox 4	scaffold_5:39986259-39987337	0.426116	5.8589	0.0727297	0.125524	0.511018
Ciclev10002439m.g	AT4G14746.1		scaffold_5:29706687-29710388	13.1423	14.0133	0.937845	1	1
Ciclev10002442m.g	AT1G47410.1		scaffold_5:40300305-40304768	63.9695	19.4987	3.28071	4.91e-07	1.25e-05
Ciclev10002443m.g	AT4G13070.1	RNA-binding CRS1 / YhbY (CRM) domain protein	scaffold_5:13064039-13065284	18.2009	13.3	1.36849	0.38508	0.96198
Ciclev10002444m.g	AT1G06060.1	LisH and RanBPM domains containing protein	scaffold_5:41450880-41454042	18.8628	32.7586	0.575812	0.0950778	0.426045
Ciclev10002449m.g	AT4G11060.1	mitochondrially targeted single-stranded DNA binding protein	scaffold_5:33818577-33821459	13.4423	19.1719	0.701146	0.394754	0.973954
Ciclev10002450m.g	AT5G42960.1		scaffold_5:40938164-40941920	88.7102	87.672	1.01184	0.763839	1
Ciclev10002453m.g	AT1G22790.1		scaffold_5:38982704-38986196	46.0155	38.9718	1.18074	0.331921	0.911652
Ciclev10002455m.g	AT4G19100.1	Protein of unknown function (DUF3464)	scaffold_5:24479555-24480973	22.2906	55.2897	0.40316	0.000422189	0.00562086
Ciclev10002461m.g	AT5G65520.1	Tetratricopeptide repeat (TPR)-like superfamily protein	scaffold_5:35510725-35512747	130.125	79.7446	1.63177	0.000144069	0.00216025
Ciclev10002462m.g	AT3G17380.1	TRAF-like family protein	scaffold_5:7350488-7351678	0.927813	1.90727	0.486461	1	1
Ciclev10002463m.g	AT2G02390.2	glutathione S-transferase zeta 1	scaffold_5:176649-180562	44.6931	101.281	0.441278	6.98e-06	0.000143067
Ciclev10002464m.g	AT2G02390.1	glutathione S-transferase zeta 1	scaffold_5:261710-265530	3.95485	5.14998	0.767935	0.754397	1
Ciclev10002467m.g	AT4G09620.1	Mitochondrial transcription termination factor family protein	scaffold_5:39446393-39448356	19.3636	42.5561	0.455014	0.00765264	0.0633347
Ciclev10002470m.g	AT1G74970.1	ribosomal protein S9	scaffold_5:40689092-40691266	111.776	108.659	1.02869	0.637978	1
Ciclev10002472m.g	AT3G05327.1	Cyclin family protein	scaffold_5:32888505-32889497	13.2201	14.3213	0.923108	1	1
Ciclev10002473m.g	AT1G43890.1	RAB GTPASE HOMOLOG B18	scaffold_5:38139261-38142080	26.6835	26.4414	1.00916	0.892693	1
Ciclev10002475m.g	AT5G27280.1	Zim17-type zinc finger protein	scaffold_5:42329950-42331110	49.2988	98.2061	0.501993	0.000152125	0.00227224
Ciclev10002476m.g	AT1G57770.1	FAD/NAD(P)-binding oxidoreductase family protein	scaffold_5:4566753-4568404	1.19771	1.45483	0.823265	1	1
Ciclev10002477m.g	AT1G43890.1	RAB GTPASE HOMOLOG B18	scaffold_5:17555131-17558910	37.6351	63.4924	0.59275	0.0222658	0.145862
Ciclev10002478m.g	AT1G75980.1	Single hybrid motif superfamily protein	scaffold_5:42236417-42238575	12.6107	9.18605	1.37281	0.5349	1
Ciclev10002480m.g	AT1G47200.1	WPP domain protein 2	scaffold_5:39797662-39798701	8.77362	7.05013	1.24446	0.811424	1
Ciclev10002483m.g	AT3G04950.1		scaffold_5:30797712-30800237	8.20838	6.72024	1.22144	0.623141	1
Ciclev10002484m.g	AT4G37925.1	subunit NDH-M of NAD(P)H:plastoquinone dehydrogenase complex	scaffold_5:37866132-37867392	11.5891	29.7201	0.389941	0.00843043	0.0681974
Ciclev10002486m.g	AT4G31940.1	cytochrome P450, family 82, subfamily C, polypeptide 4	scaffold_5:5916191-5919089	25.3632	33.4116	0.759114	0.438922	1
Ciclev10002493m.g	AT1G42960.1		scaffold_5:42879562-42882316	118.458	217.021	0.545837	4.62e-07	1.18e-05
Ciclev10002494m.g	AT4G09830.1	Uncharacterised conserved protein UCP009193	scaffold_5:38988629-38991837	31.5486	22.496	1.40241	0.180048	0.64484
Ciclev10002495m.g	AT5G45590.1	Ribosomal protein L35	scaffold_5:25827406-25830697	7.80434	9.32949	0.836524	0.815194	1
Ciclev10002498m.g	AT5G06430.1	Thioredoxin superfamily protein	scaffold_5:40457008-40460158	18.1164	20.0153	0.905128	0.875626	1
Ciclev10002499m.g	AT1G20770.1		scaffold_5:42835733-42838018	14.1539	24.5741	0.575968	0.157141	0.592508
Ciclev10002503m.g	AT5G21090.1	Leucine-rich repeat (LRR) family protein	scaffold_5:11129408-11130029	0.221188	0.247448	0.893877	1	1
Ciclev10002505m.g	AT3G53140.1	O-methyltransferase family protein	scaffold_5:25191868-25193363	15.0367	6.35362	2.36664	0.0598058	0.310381
Ciclev10002509m.g	AT5G42330.1		scaffold_5:42648256-42649414	3.9855	1.56349	2.5491	0.444228	1
Ciclev10002511m.g	AT5G27990.1	Pre-rRNA-processing protein TSR2, conserved region	scaffold_5:30730207-30732143	12.2416	17.146	0.713962	0.475883	1
Ciclev10002513m.g	AT3G12390.1	Nascent polypeptide-associated complex (NAC), alpha subunit family protein	scaffold_5:19784724-19787578	61.3112	69.8932	0.877213	0.664022	1
Ciclev10002515m.g	AT1G21720.1	proteasome beta subunit C1	scaffold_5:37600816-37604471	87.5666	131.762	0.664582	0.00840786	0.0681001
Ciclev10002520m.g			scaffold_5:34692572-34695351	8.32161	14.8208	0.561482	0.309785	0.873791
Ciclev10002522m.g	AT4G09720.1	RAB GTPase homolog G3A	scaffold_5:39175823-39179944	21.1142	8.17707	2.58212	0.0183411	0.126172
Ciclev10002523m.g	AT5G42380.1	calmodulin like 37	scaffold_5:43189009-43190241	51.2423	226.581	0.226154	6.31e-26	7.93e-24
Ciclev10002525m.g	AT1G09920.1	TRAF-type zinc finger-related	scaffold_5:35307568-35311024	54.9223	45.7327	1.20094	0.275753	0.826065
Ciclev10002528m.g	AT3G05760.1	C2H2 and C2HC zinc fingers superfamily protein	scaffold_5:33921983-33926087	48.7694	62.1517	0.784683	0.298613	0.855997
Ciclev10002529m.g			scaffold_5:24735873-24738253	0.895026	0.330861	2.70514	1	1
Ciclev10002531m.g	AT5G42900.3	cold regulated gene 27	scaffold_5:40163477-40166214	70.0764	93.8134	0.746976	0.138872	0.542211
Ciclev10002532m.g	AT1G54500.1	Rubredoxin-like superfamily protein	scaffold_5:30631871-30632814	27.2069	30.6609	0.887348	0.896575	1
Ciclev10002536m.g	AT1G79590.1	syntaxin of plants 52	scaffold_5:30514545-30517126	8.804	10.3697	0.849012	0.824505	1
Ciclev10002540m.g	AT1G10200.1	GATA type zinc finger transcription factor family protein	scaffold_5:34672741-34674507	37.2209	103.262	0.360451	7.9e-08	2.31e-06
Ciclev10002541m.g	AT4G35750.1	SEC14 cytosolic factor family protein / phosphoglyceride transfer family protein	scaffold_5:42365305-42369429	5.23297	8.22189	0.636468	0.608335	1
Ciclev10002542m.g	AT1G77230.1	Tetratricopeptide repeat (TPR)-like superfamily protein	scaffold_5:37964988-37967950	28.1178	25.098	1.12032	0.592569	1
Ciclev10002548m.g	AT4G14110.1	COP9 signalosome, subunit CSN8	scaffold_5:19511363-19515330	29.3299	49.0093	0.598456	0.0439121	0.247036
Ciclev10002549m.g	AT5G43822.1	Pentatricopeptide repeat (PPR) superfamily protein	scaffold_5:42838210-42840133	11.4804	12.6258	0.909281	1	1
Ciclev10002550m.g	AT1G32260.1		scaffold_5:27147111-27151050	7.60156	4.0906	1.8583	0.415672	1
Ciclev10002551m.g	AT1G75840.1	RAC-like GTP binding protein 5	scaffold_5:42109315-42112542	52.2144	52.3254	0.997879	0.846582	1
Ciclev10002552m.g	AT3G23640.1	heteroglycan glucosidase 1	scaffold_5:27516143-27517749	1.00515	0.638748	1.57363	0.617655	1
Ciclev10002554m.g	AT3G27890.1	NADPH:quinone oxidoreductase	scaffold_5:21581030-21583751	18.753	26.8417	0.698652	0.306436	0.866995
Ciclev10002560m.g	AT2G30440.1	thylakoid processing peptide	scaffold_5:37676182-37679875	1.35523	3.48671	0.388684	0.687874	1
Ciclev10002562m.g	AT2G21600.1	endoplasmatic reticulum retrieval protein 1B	scaffold_5:41163521-41166013	21.6774	26.4482	0.819617	0.571961	1
Ciclev10002564m.g	AT1G27450.1	adenine phosphoribosyl transferase 1	scaffold_5:18011821-18014264	86.0558	89.5779	0.960681	1	1
Ciclev10002565m.g	AT3G46630.1	Protein of unknown function (DUF3223)	scaffold_5:39881995-39885588	56.1835	108.923	0.515809	0.000176369	0.00258061
Ciclev10002566m.g	AT4G02080.1	secretion-associated RAS super family 2	scaffold_5:33964667-33966527	50.9079	59.2056	0.859849	0.569224	1
Ciclev10002567m.g	AT4G33740.1		scaffold_5:34971111-34972764	1.38162	1.82988	0.755033	1	1
Ciclev10002569m.g	AT5G43700.1	AUX/IAA transcriptional regulator family protein	scaffold_5:29413142-29414562	0.179208	1e-05	17920.8	1	1
Ciclev10002572m.g	AT1G44790.1	ChaC-like family protein	scaffold_5:37258471-37261610	28.0165	40.5536	0.690851	0.232223	0.745377
Ciclev10002573m.g	AT1G22450.1	cytochrome C oxidase 6B	scaffold_5:36106049-36109239	57.0563	50.9425	1.12001	0.390054	0.963955
Ciclev10002574m.g	AT2G40600.1	appr-1-p processing enzyme family protein	scaffold_5:5083100-5085647	92.8764	96.4185	0.963263	1	1
Ciclev10002575m.g	AT1G56420.1		scaffold_5:33996379-33999120	11.8083	12.1642	0.970742	1	1
Ciclev10002580m.g	AT2G30270.1	Protein of unknown function (DUF567)	scaffold_5:12812789-12815627	19.1655	21.2405	0.902309	0.878636	1
Ciclev10002585m.g	AT3G12300.1		scaffold_5:21106735-21110055	25.1218	33.1895	0.75692	0.438922	1
Ciclev10002586m.g	AT2G40600.1	appr-1-p processing enzyme family protein	scaffold_5:5078202-5082511	62.1958	69.9164	0.889574	0.729238	1
Ciclev10002589m.g			scaffold_5:5074553-5076191	24.4857	31.0022	0.789805	0.508161	1
Ciclev10002591m.g	AT1G72230.1	Cupredoxin superfamily protein	scaffold_5:36026830-36027744	0.151722	0.16985	0.893271	1	1
Ciclev10002594m.g	AT1G08845.2	Ribosomal L18p/L5e family protein	scaffold_5:31421317-31424061	23.8871	34.7037	0.688316	0.241121	0.761812
Ciclev10002597m.g	AT5G27850.1	Ribosomal protein L18e/L15 superfamily protein	scaffold_5:33627471-33629218	117.902	98.8242	1.19305	0.118504	0.489857
Ciclev10002598m.g	AT1G72175.1	RING/U-box protein with domain of unknown function (DUF 1232)	scaffold_5:39682995-39692504	20.5606	16.5034	1.24584	0.517159	1
Ciclev10002599m.g	AT1G71750.2	Hypoxanthine-guanine phosphoribosyltransferase	scaffold_5:39153138-39156117	37.6631	50.7559	0.742044	0.245006	0.772195
Ciclev10002600m.g	AT1G71780.1		scaffold_5:39180931-39182902	51.88	32.0499	1.61873	0.029513	0.182237
Ciclev10002601m.g	AT5G28050.1	Cytidine/deoxycytidylate deaminase family protein	scaffold_5:30613183-30615183	155.208	70.6806	2.19591	2.23e-09	8.26e-08
Ciclev10002602m.g	AT3G04800.1	translocase inner membrane subunit 23-3	scaffold_5:29803195-29804310	19.5511	10.0331	1.94866	0.105217	0.455965
Ciclev10002603m.g	AT5G16250.1		scaffold_5:34293367-34294163	1.55041	1.09506	1.41582	1	1
Ciclev10002605m.g	AT2G33740.2	Nitrogen regulatory PII-like, alpha/beta	scaffold_5:35782418-35784765	33.4885	58.6863	0.570636	0.0170081	0.119205
Ciclev10002608m.g	AT5G47830.1		scaffold_5:39938189-39940217	8.35079	8.20506	1.01776	1	1
Ciclev10002610m.g	AT1G77400.1		scaffold_5:37650547-37651925	0.176814	0.197876	0.89356	1	1
Ciclev10002611m.g	AT4G02450.1	HSP20-like chaperones superfamily protein	scaffold_5:39204024-39206398	98.301	111.53	0.881386	0.58186	1
Ciclev10002613m.g	AT1G58190.2	receptor like protein 9	scaffold_5:27929610-27931698	759.881	461.728	1.64573	2.42e-20	2.33e-18
Ciclev10002616m.g	AT1G42480.1		scaffold_5:42850228-42852413	9.57006	12.544	0.762919	0.679052	1
Ciclev10002618m.g	AT1G02380.1		scaffold_5:34191763-34193830	0.327474	0.0922535	3.54972	1	1
Ciclev10002620m.g	AT4G36800.1	RUB1 conjugating enzyme 1	scaffold_5:11470191-11471157	4.85527	4.7902	1.01358	1	1
Ciclev10002622m.g	AT1G09330.1		scaffold_5:34245417-34248236	74.4617	62.9745	1.18241	0.233211	0.747063
Ciclev10002624m.g	AT5G45550.1	Mob1/phocein family protein	scaffold_5:24800760-24805736	228.162	188.494	1.21045	0.0187996	0.12864
Ciclev10002625m.g	AT1G34000.1	one-helix protein 2	scaffold_5:38979502-38982238	30.8769	58.0171	0.532203	0.00597721	0.0520968
Ciclev10002626m.g	AT1G71730.1		scaffold_5:39143848-39144751	19.7457	32.7267	0.603351	0.129953	0.522999
Ciclev10002627m.g	AT1G78020.1	Protein of unknown function (DUF581)	scaffold_5:36646218-36647375	3.21554	6.91054	0.46531	0.549728	1
Ciclev10002629m.g	AT3G06730.1	Thioredoxin z	scaffold_5:21475234-21479008	35.8961	63.078	0.569075	0.00929998	0.073722
Ciclev10002632m.g	AT5G47550.1	Cystatin/monellin superfamily protein	scaffold_5:7104382-7105206	3.46659	0.921044	3.76376	0.209754	0.713732
Ciclev10002634m.g	AT1G09150.1	pseudouridine synthase and archaeosine transglycosylase (PUA) domain-containing protein	scaffold_5:33622687-33626661	22.8552	35.6597	0.640925	0.151547	0.577603
Ciclev10002637m.g	AT4G19003.1	E2F/DP family winged-helix DNA-binding domain	scaffold_5:26507014-26509938	21.0537	32.1838	0.654171	0.224544	0.731772
Ciclev10002639m.g	AT3G05000.1	Transport protein particle (TRAPP) component	scaffold_5:31300142-31302469	25.8163	28.1403	0.917414	0.892891	1
Ciclev10002644m.g			scaffold_5:38780108-38781399	45.7087	70.575	0.647661	0.0415477	0.235928
Ciclev10002646m.g	AT5G61230.1	Ankyrin repeat family protein	scaffold_5:27814563-27818048	38.1161	26.0442	1.46352	0.110017	0.470135
Ciclev10002649m.g	AT3G07860.1	Ubiquitin-like superfamily protein	scaffold_5:42352016-42353093	15.1857	14.8184	1.02479	0.858104	1
Ciclev10002650m.g	AT3G17380.1	TRAF-like family protein	scaffold_5:7397235-7398469	0.932225	1.04501	0.892073	1	1
Ciclev10002653m.g	AT3G04780.1	Protein of unknown function (DUF1000)	scaffold_5:29699946-29702961	43.691	61.6817	0.70833	0.144715	0.560616
Ciclev10002654m.g	AT5G42655.1	Disease resistance-responsive (dirigent-like protein) family protein	scaffold_5:40652360-40653042	3.62025	2.13856	1.69284	0.721429	1
Ciclev10002655m.g	AT4G16710.1	glycosyltransferase family protein 28	scaffold_5:32634494-32639205	4.9459	2.60983	1.8951	0.499686	1
Ciclev10002660m.g	AT2G32580.1	Protein of unknown function (DUF1068)	scaffold_5:31900523-31902875	7.16267	12.4756	0.574134	0.385321	0.961093
Ciclev10002661m.g	AT1G54850.1	HSP20-like chaperones superfamily protein	scaffold_5:32717020-32718151	0.590839	2.79556	0.211349	0.625299	1
Ciclev10002663m.g	AT1G08830.1	copper/zinc superoxide dismutase 1	scaffold_5:31178656-31181813	23.5789	14.0247	1.68124	0.148766	0.56936
Ciclev10002666m.g	AT1G27530.1		scaffold_5:35123212-35124730	87.1659	100.236	0.869607	0.51339	1
Ciclev10002668m.g	AT1G76010.1	Alba DNA/RNA-binding protein	scaffold_5:38863413-38865093	7.56441	5.73064	1.31999	0.600877	1
Ciclev10002669m.g	AT1G75350.1	Ribosomal protein L31	scaffold_5:41208819-41211050	73.9827	93.1498	0.794234	0.216991	0.720007
Ciclev10002670m.g	AT1G57770.1	FAD/NAD(P)-binding oxidoreductase family protein	scaffold_5:4526708-4528008	1.41633	3.62453	0.390762	0.687874	1
Ciclev10002671m.g	AT4G18060.1	SH3 domain-containing protein	scaffold_5:12528560-12532006	45.0046	83.546	0.53868	0.00204424	0.0214136
Ciclev10002672m.g	AT2G35470.1		scaffold_5:27365221-27366726	4.52055	3.63784	1.24265	0.749386	1
Ciclev10002675m.g	AT1G35210.1		scaffold_5:36080141-36081013	20.1357	100.738	0.199882	4.45e-13	2.5e-11
Ciclev10002676m.g	AT4G02370.1	Protein of unknown function, DUF538	scaffold_5:33426152-33427255	20.1835	31.9648	0.631429	0.215918	0.718662
Ciclev10002678m.g	AT5G02790.1	Glutathione S-transferase family protein	scaffold_5:24867957-24869641	152.258	161.343	0.943691	0.910288	1
Ciclev10002679m.g	AT4G19070.1	Putative membrane lipoprotein	scaffold_5:24789842-24793279	7.54424	19.1255	0.39446	0.036716	0.214469
Ciclev10002683m.g	AT4G36040.1	Chaperone DnaJ-domain superfamily protein	scaffold_5:41972942-41973902	53.5168	13.0004	4.11655	3.17e-07	8.34e-06
Ciclev10002684m.g	AT4G38060.2		scaffold_5:35558555-35562044	12.1962	10.7475	1.13479	0.685477	1
Ciclev10002686m.g	AT1G07700.1	Thioredoxin superfamily protein	scaffold_5:40185521-40188191	24.9786	109.18	0.228784	2.81e-13	1.6e-11
Ciclev10002687m.g	AT5G64040.1	photosystem I reaction center subunit PSI-N, chloroplast, putative / PSI-N, putative (PSAN)	scaffold_5:17809522-17810742	309.041	704.228	0.438837	9.71e-33	1.72e-30
Ciclev10002689m.g	AT3G62550.1	Adenine nucleotide alpha hydrolases-like superfamily protein	scaffold_5:33968149-33969456	92.5607	132.79	0.697046	0.0197355	0.133534
Ciclev10002690m.g	AT1G35430.1		scaffold_5:39717436-39718172	8.82277	6.37495	1.38397	0.623141	1
Ciclev10002691m.g	AT1G76760.1	thioredoxin Y1	scaffold_5:38770274-38772207	32.6777	49.4074	0.661393	0.0999044	0.443465
Ciclev10002692m.g	AT5G14320.2	Ribosomal protein S13/S18 family	scaffold_5:36986112-36987382	152.03	249.974	0.608183	8.69e-06	0.000175116
Ciclev10002693m.g	AT1G21550.1	Calcium-binding EF-hand family protein	scaffold_5:37891704-37892899	9.41798	18.7635	0.501931	0.138308	0.546511
Ciclev10002694m.g	AT2G32030.1	Acyl-CoA N-acyltransferases (NAT) superfamily protein	scaffold_5:30751920-30752967	135.603	72.0922	1.88097	3.09e-06	6.81e-05
Ciclev10002696m.g	AT4G36020.1	cold shock domain protein 1	scaffold_5:37113170-37113949	5.20932	9.29375	0.560519	0.455959	1
Ciclev10002698m.g	AT1G76100.1	plastocyanin 1	scaffold_5:42322096-42327438	300.558	826.165	0.363799	6.7e-53	2.03e-50
Ciclev10002699m.g	AT3G16640.1	translationally controlled tumor protein	scaffold_5:33381134-33382700	627.162	333.235	1.88204	3.16e-24	3.73e-22
Ciclev10002700m.g	AT1G76405.2		scaffold_5:42907630-42909811	25.8164	58.8468	0.438705	0.000698243	0.00870353
Ciclev10002701m.g	AT3G54480.1	SKP1/ASK-interacting protein 5	scaffold_5:800596-801885	11.3594	12.288	0.92443	1	1
Ciclev10002702m.g	AT5G27430.1	Signal peptidase subunit	scaffold_5:29671515-29674529	26.0022	42.0319	0.61863	0.0938623	0.425126
Ciclev10002703m.g	AT4G33800.1		scaffold_5:34704104-34705984	5.51046	6.63967	0.82993	1	1
Ciclev10002705m.g	AT5G27430.1	Signal peptidase subunit	scaffold_5:32680868-32684767	23.9819	30.1878	0.794424	0.500513	1
Ciclev10002706m.g	AT1G21550.1	Calcium-binding EF-hand family protein	scaffold_5:37884978-37885975	24.8953	40.5059	0.614609	0.0842323	0.393192
Ciclev10002707m.g	AT2G22540.1	K-box region and MADS-box transcription factor family protein	scaffold_5:35624924-35626992	16.1351	15.1969	1.06174	0.862332	1
Ciclev10002708m.g	AT5G42200.1	RING/U-box superfamily protein	scaffold_5:42259212-42259753	0.937841	2.43327	0.385424	0.625299	1
Ciclev10002709m.g	AT1G35710.1	Protein kinase family protein with leucine-rich repeat domain	scaffold_5:6571917-6573430	7.64632	4.45562	1.71611	0.415672	1
Ciclev10002710m.g	AT1G75630.2	vacuolar H+-pumping ATPase 16 kDa proteolipid subunit 4	scaffold_5:41618252-41620257	181.486	113.034	1.60559	2e-05	0.000370494
Ciclev10002713m.g			scaffold_5:22711547-22714855	28.5559	22.2698	1.28227	0.335779	0.910877
Ciclev10002714m.g	AT1G09310.1	Protein of unknown function, DUF538	scaffold_5:34219816-34223850	34.7813	38.5544	0.902136	0.81661	1
Ciclev10002716m.g	AT1G58420.1	Uncharacterised conserved protein UCP031279	scaffold_5:34768271-34769014	190.07	67.9006	2.79924	7.4e-16	5.26e-14
Ciclev10002717m.g	AT4G08280.1	Thioredoxin superfamily protein	scaffold_5:37240885-37243414	20.3147	40.4531	0.502179	0.0215097	0.142354
Ciclev10002719m.g	AT1G19910.1	ATPase, F0/V0 complex, subunit C protein	scaffold_5:37444588-37447583	38.9936	49.758	0.783665	0.341722	0.921445
Ciclev10002721m.g	AT1G72170.1	Domain of unknown function (DUF543)	scaffold_5:39674392-39677320	25.4195	36.7252	0.692154	0.256841	0.797295
Ciclev10002722m.g	AT1G76060.1	LYR family of Fe/S cluster biogenesis protein	scaffold_5:42284790-42286274	9.72913	6.28685	1.54754	0.473225	1
Ciclev10002723m.g			scaffold_5:11380620-11381768	1e-05	0.490604	2.04e-05	1	1
Ciclev10002724m.g			scaffold_5:7233934-7235988	2.10833	2.75502	0.765268	1	1
Ciclev10002725m.g	AT3G03270.2	Adenine nucleotide alpha hydrolases-like superfamily protein	scaffold_5:29032157-29033401	31.426	22.3469	1.40628	0.180048	0.64484
Ciclev10002726m.g			scaffold_5:17602752-17605413	0.22947	0.944115	0.243053	1	1
Ciclev10002727m.g	AT1G74880.1	NAD(P)H:plastoquinone dehydrogenase complex subunit O	scaffold_5:17899103-17900709	62.6507	99.8508	0.627443	0.00952505	0.0748928
Ciclev10002729m.g	AT2G41560.1	autoinhibited Ca(2+)-ATPase, isoform 4	scaffold_5:1341621-1342585	5.34689	4.16245	1.28455	0.770362	1
Ciclev10002730m.g	AT1G34350.1		scaffold_5:39509508-39511363	15.7302	28.5118	0.551708	0.0750076	0.363727
Ciclev10002731m.g	AT1G75390.1	basic leucine-zipper 44	scaffold_5:41330381-41331699	36.4347	18.4934	1.97015	0.0110287	0.0840196
Ciclev10002732m.g	AT1G32250.1	Calcium-binding EF-hand family protein	scaffold_5:27141621-27142692	2.74421	0.853004	3.21711	0.365306	0.957432
Ciclev10002733m.g	AT5G67190.1	DREB and EAR motif protein 2	scaffold_5:39974112-39975525	30.7766	2.90449	10.5962	2.79e-07	7.49e-06
Ciclev10002734m.g	AT4G24265.1		scaffold_5:961510-962236	0.41152	1e-05	41152	1	1
Ciclev10002735m.g	AT3G56340.1	Ribosomal protein S26e family protein	scaffold_5:13759533-13761411	256.683	250.918	1.02298	0.477937	1
Ciclev10002737m.g	AT1G75440.1	ubiquitin-conjugating enzyme 16	scaffold_5:41386408-41389807	92.0229	76.4537	1.20364	0.145145	0.560932
Ciclev10002738m.g	AT1G27630.1	cyclin T 1;3	scaffold_5:41285150-41288221	0.150983	0.337318	0.447598	1	1
Ciclev10002740m.g			scaffold_5:35260439-35261145	2.92014	4.98399	0.585904	0.726999	1
Ciclev10002741m.g	AT3G57870.1	sumo conjugation enzyme 1	scaffold_5:39957970-39960666	45.7847	31.3175	1.46195	0.0891076	0.406923
Ciclev10002743m.g	AT4G08685.1	Pollen Ole e 1 allergen and extensin family protein	scaffold_5:36634134-36636064	570.075	518.547	1.09937	0.0268949	0.168981
Ciclev10002744m.g	AT1G68310.2	Protein of unknown function (DUF59)	scaffold_5:26510552-26513762	46.9601	58.327	0.805118	0.382052	0.955895
Ciclev10002746m.g	AT1G56300.1	Chaperone DnaJ-domain superfamily protein	scaffold_5:33875642-33877205	215.661	220.515	0.977988	0.885876	1
Ciclev10002747m.g			scaffold_5:38789127-38789955	0.157529	1.04089	0.151341	1	1
Ciclev10002748m.g	AT4G33430.1	BRI1-associated receptor kinase	scaffold_5:22329935-22331919	200.706	65.0134	3.08715	2.78e-18	2.35e-16
Ciclev10002749m.g			scaffold_5:38784682-38785740	3.49254	8.87131	0.393689	0.268099	0.81193
Ciclev10002751m.g	AT1G75950.1	S phase kinase-associated protein 1	scaffold_5:42187713-42189727	217.337	218.096	0.99652	0.737703	1
Ciclev10002752m.g	AT1G24620.1	EF hand calcium-binding protein family	scaffold_5:36974512-36975459	218.332	234.452	0.931244	0.778215	1
Ciclev10002753m.g	AT3G20230.1	Ribosomal L18p/L5e family protein	scaffold_5:39289639-39292193	22.8126	39.1915	0.58208	0.05799	0.304137
Ciclev10002756m.g	AT1G08830.1	copper/zinc superoxide dismutase 1	scaffold_5:31121804-31124592	60.5197	120.761	0.501153	2.91e-05	0.000524573
Ciclev10002759m.g	AT4G08240.1		scaffold_5:37158688-37161113	26.04	42.3037	0.615549	0.0938623	0.425126
Ciclev10002760m.g	AT1G31940.1		scaffold_5:26168593-26171673	15.5566	24.6858	0.630184	0.214758	0.71702
Ciclev10002761m.g	AT3G21510.1	histidine-containing phosphotransmitter 1	scaffold_5:32261505-32263373	3.98764	18.5047	0.215493	0.00271201	0.0271033
Ciclev10002763m.g	AT5G15220.1	Ribosomal protein L27 family protein	scaffold_5:41057354-41058811	37.134	38.2422	0.971022	1	1
Ciclev10002764m.g	AT1G22780.1	Ribosomal protein S13/S18 family	scaffold_5:39012491-39014490	208.487	336.271	0.619997	5.03e-07	1.28e-05
Ciclev10002766m.g	AT1G19530.1		scaffold_5:41154410-41155747	34.9317	71.2119	0.490532	0.000920865	0.0110174
Ciclev10002768m.g	AT4G08570.1	Heavy metal transport/detoxification superfamily protein	scaffold_5:36722429-36723341	33.2781	24.1714	1.37676	0.194913	0.679598
Ciclev10002769m.g	AT5G27720.1	Small nuclear ribonucleoprotein family protein	scaffold_5:27430779-27433174	19.3386	17.7008	1.09253	0.746206	1
Ciclev10002770m.g	AT5G28750.1	Bacterial sec-independent translocation protein mttA/Hcf106	scaffold_5:29463603-29466318	149.3	239.621	0.623067	3.1e-05	0.000555494
Ciclev10002776m.g	AT5G09570.1	Cox19-like CHCH family protein	scaffold_5:35403322-35406075	46.7637	27.2233	1.71778	0.0204981	0.137445
Ciclev10002778m.g	AT5G17870.1	plastid-specific 50S ribosomal protein 6	scaffold_5:34976703-34977611	53.6007	111.373	0.481272	2.36e-05	0.000431061
Ciclev10002782m.g	AT1G20696.3	high mobility group B3	scaffold_5:42799537-42801821	524.378	1068.57	0.490729	1.78e-38	3.79e-36
Ciclev10002788m.g	AT1G60870.1	maternal effect embryo arrest 9	scaffold_5:9976756-9977512	26.6909	56.9732	0.468482	0.00210953	0.022026
Ciclev10002791m.g	AT1G09812.1		scaffold_5:5098100-5099777	1.96272	8.00235	0.245268	0.0660085	0.332153
Ciclev10002793m.g	AT1G60950.1	2Fe-2S ferredoxin-like superfamily protein	scaffold_5:8435122-8435971	447.188	1153.72	0.387605	6.98e-66	2.82e-63
Ciclev10002795m.g	AT5G27670.1	histone H2A 7	scaffold_5:33256353-33257201	0.592162	0.486903	1.21618	1	1
Ciclev10002796m.g	AT1G22690.1	Gibberellin-regulated family protein	scaffold_5:39444680-39445917	3.37603	12.0973	0.279073	0.0497958	0.271229
Ciclev10002797m.g	AT1G47830.1	SNARE-like superfamily protein	scaffold_5:41899221-41901896	54.7443	56.3085	0.972221	1	1
Ciclev10002801m.g	AT1G76440.1	HSP20-like chaperones superfamily protein	scaffold_5:42963149-42967105	8.7003	11.1383	0.781116	0.664964	1
Ciclev10002802m.g	AT3G20750.1	GATA transcription factor 29	scaffold_5:29539972-29540425	2.71631	4.29943	0.631784	0.726999	1
Ciclev10002803m.g	AT3G56710.1	sigma factor binding protein 1	scaffold_5:21399870-21400827	783.701	1206.04	0.649813	6.83e-18	5.6e-16
Ciclev10002804m.g	AT1G54690.1	gamma histone variant H2AX	scaffold_5:32313298-32314734	28.0382	43.1133	0.650338	0.128033	0.516775
Ciclev10002805m.g	AT3G49760.1	basic leucine-zipper 5	scaffold_5:34796710-34797694	0.24848	0.55437	0.448221	1	1
Ciclev10002808m.g	AT4G08330.1		scaffold_5:37392780-37394177	7.22648	3.97843	1.81642	0.258252	0.798092
Ciclev10002811m.g	AT2G26520.1		scaffold_5:40460686-40461620	0.115658	0.129257	0.894791	1	1
Ciclev10002812m.g	AT5G48810.1	cytochrome B5 isoform D	scaffold_5:34470366-34471009	0.820007	0.908293	0.9028	1	1
Ciclev10002813m.g	AT4G09030.1	arabinogalactan protein 10	scaffold_5:36034339-36035011	10.8505	11.7386	0.924344	1	1
Ciclev10002814m.g	AT5G09310.1		scaffold_5:17836086-17837904	41.8337	40.4475	1.03427	0.82647	1
Ciclev10002815m.g	AT4G14600.1	Target SNARE coiled-coil domain protein	scaffold_5:35894200-35898491	54.0301	70.9172	0.761876	0.247117	0.776321
Ciclev10002816m.g	AT2G23270.1		scaffold_5:39823361-39824171	21.8121	44.7276	0.487665	0.0098057	0.0766325
Ciclev10002817m.g	AT4G40030.2	Histone superfamily protein	scaffold_5:41651170-41652391	287.456	327.485	0.877768	0.276482	0.826459
Ciclev10002818m.g	AT1G36980.1		scaffold_5:36919656-36923034	30.9583	44.0513	0.702778	0.168937	0.623743
Ciclev10002819m.g	AT5G28060.1	Ribosomal protein S24e family protein	scaffold_5:30608390-30610556	228.349	264.791	0.862374	0.242251	0.764384
Ciclev10002820m.g	AT3G06130.1	Heavy metal transport/detoxification superfamily protein	scaffold_5:41248084-41248874	2.36853	0.725239	3.26586	0.365306	0.957432
Ciclev10002822m.g	AT3G53690.1	RING/U-box superfamily protein	scaffold_5:29550653-29551103	0.305568	1.68397	0.181457	1	1
Ciclev10002824m.g	AT5G16650.1	Chaperone DnaJ-domain superfamily protein	scaffold_5:35769297-35771717	52.3159	106.289	0.492204	6.75e-05	0.0011072
Ciclev10002826m.g	AT3G12260.1	LYR family of Fe/S cluster biogenesis protein	scaffold_5:21362593-21366180	31.5712	46.6767	0.67638	0.143873	0.558583
Ciclev10002829m.g			scaffold_5:28284449-28287362	1.62384	1.82881	0.887922	1	1
Ciclev10002830m.g	AT1G20580.1	Small nuclear ribonucleoprotein family protein	scaffold_5:42664618-42666950	69.2814	70.457	0.983315	0.932914	1
Ciclev10002831m.g	AT4G08500.1	MAPK/ERK kinase kinase 1	scaffold_5:1155878-1157401	10.7632	7.53156	1.42908	0.496375	1
Ciclev10002832m.g	AT2G44310.1	Calcium-binding EF-hand family protein	scaffold_5:30555223-30556028	0.669793	0.931212	0.71927	1	1
Ciclev10002833m.g	AT4G02620.1	vacuolar ATPase subunit F family protein	scaffold_5:29475603-29479771	96.1656	77.705	1.23757	0.0961731	0.430256
Ciclev10002835m.g			scaffold_5:41014863-41017027	17.1114	26.4795	0.646213	0.236888	0.756462
Ciclev10002836m.g	AT1G10030.1	homolog of yeast ergosterol28	scaffold_5:34973021-34975275	6.75604	18.161	0.372008	0.0297781	0.183289
Ciclev10002837m.g	AT1G02680.1	TBP-associated factor 13	scaffold_5:29677633-29680577	74.2957	103.11	0.720548	0.0615499	0.316127
Ciclev10002838m.g	AT5G39600.1		scaffold_5:41709037-41711037	13.6682	20.3782	0.670727	0.313892	0.882162
Ciclev10002840m.g	AT2G02850.1	plantacyanin	scaffold_5:38154974-38155769	1e-05	0.338582	2.95e-05	1	1
Ciclev10002841m.g	AT5G64816.1		scaffold_5:35647841-35649029	66.3873	55.7796	1.19017	0.241433	0.761927
Ciclev10002842m.g	AT3G45020.1	Ribosomal L18p/L5e family protein	scaffold_5:8622433-8623235	6.31207	8.22424	0.767496	0.804245	1
Ciclev10002843m.g	AT1G56220.3	Dormancy/auxin associated family protein	scaffold_5:33411666-33413970	213.657	434.834	0.491353	1.75e-16	1.32e-14
Ciclev10002844m.g	AT1G27695.1	glycine-rich protein	scaffold_5:34465299-34467958	16.7349	23.5248	0.711373	0.352839	0.936422
Ciclev10002848m.g	AT1G56260.1		scaffold_5:33783474-33786446	22.1638	29.594	0.748929	0.492513	1
Ciclev10002849m.g			scaffold_5:2800167-2804104	5.4261	6.53892	0.829816	1	1
Ciclev10002853m.g	AT1G30845.1		scaffold_5:41654673-41656808	9.64227	15.5036	0.621937	0.329462	0.908509
Ciclev10002854m.g	AT5G42890.1	sterol carrier protein 2	scaffold_5:40189638-40191021	29.456	54.8044	0.537475	0.0123681	0.0917676
Ciclev10002858m.g			scaffold_5:8273782-8274536	20.235	24.2391	0.834808	0.661679	1
Ciclev10002859m.g	AT3G51030.1	thioredoxin H-type 1	scaffold_5:41432161-41439014	149.23	71.8065	2.07822	2.68e-08	8.44e-07
Ciclev10002862m.g			scaffold_5:43002882-43004209	22.9393	23.2525	0.98653	1	1
Ciclev10002863m.g	AT5G57290.1	60S acidic ribosomal protein family	scaffold_5:21229071-21230408	134.954	130.442	1.03459	0.581351	1
Ciclev10002865m.g	AT1G77350.1		scaffold_5:37721099-37724344	41.1677	76.2631	0.539812	0.00319096	0.0310561
Ciclev10002868m.g	AT1G48200.1		scaffold_5:37309558-37310597	16.48	21.342	0.772186	0.525646	1
Ciclev10002869m.g			scaffold_5:499613-500529	1.36238	4.38793	0.310484	0.453779	1
Ciclev10002870m.g	AT1G71950.1	Proteinase inhibitor, propeptide	scaffold_5:39412818-39414334	153.398	199.929	0.767262	0.0431971	0.243296
Ciclev10002873m.g			scaffold_5:4343397-4343844	0.419354	1.37921	0.304054	1	1
Ciclev10002874m.g	AT1G22050.1	membrane-anchored ubiquitin-fold protein 6 precursor	scaffold_5:36748680-36750848	33.4729	84.1229	0.397905	8.19e-06	0.000165387
Ciclev10002876m.g			scaffold_5:516499-517176	0.90962	1.61005	0.564964	1	1
Ciclev10002879m.g			scaffold_5:1234808-1236143	6.33763	5.15902	1.22846	0.78685	1
Ciclev10002881m.g	AT5G01075.1	Glycosyl hydrolase family 35 protein	scaffold_5:34523831-34526367	0.26955	1e-05	26955	1	1
Ciclev10002882m.g	AT4G10810.1		scaffold_5:34791962-34793333	1.62479	5.25997	0.308897	0.289848	0.843614
Ciclev10002883m.g	AT1G32210.1	Defender against death (DAD family) protein	scaffold_5:26949950-26952841	149.5	164.549	0.908544	0.652189	1
Ciclev10002884m.g			scaffold_5:41784010-41785946	5.56438	2.8883	1.92652	0.334705	0.91579
Ciclev10002885m.g	AT1G29470.1	S-adenosyl-L-methionine-dependent methyltransferases superfamily protein	scaffold_5:23221927-23224875	0.300263	0.0374892	8.00932	1	1
Ciclev10002887m.g			scaffold_5:5011560-5011914	4.43059	1.40106	3.16231	0.279817	0.833852
Ciclev10002888m.g			scaffold_5:40971195-40971829	1.16478	3.68124	0.31641	0.687874	1
Ciclev10002890m.g			scaffold_5:35089436-35093078	7.5483	3.05752	2.46877	0.258252	0.798092
Ciclev10002893m.g	AT2G20142.1	Toll-Interleukin-Resistance (TIR) domain family protein	scaffold_5:6065465-6066132	1e-05	0.22584	4.43e-05	1	1
Ciclev10002895m.g	AT4G10040.1	cytochrome c-2	scaffold_5:2461405-2462911	103.445	107.925	0.95849	1	1
Ciclev10002897m.g	AT4G15800.1	ralf-like 33	scaffold_5:33314344-33315010	0.809479	0.717116	1.1288	1	1
Ciclev10002898m.g	AT4G03290.1	EF hand calcium-binding protein family	scaffold_5:40249659-40250314	0.851191	1e-05	85119.1	1	1
Ciclev10002899m.g	AT1G21770.1	Acyl-CoA N-acyltransferases (NAT) superfamily protein	scaffold_5:37447648-37449498	67.3258	157.91	0.426356	1.05e-08	3.53e-07
Ciclev10002900m.g			scaffold_5:445412-446312	4.06936	13.3104	0.305728	0.0645597	0.32733
Ciclev10002906m.g			scaffold_5:451973-452763	4.24469	33.903	0.125201	2.84e-06	6.29e-05
Ciclev10002907m.g	AT1G75810.1		scaffold_5:42014992-42015616	3.13067	4.38606	0.713777	1	1
Ciclev10002908m.g	AT5G26800.1		scaffold_5:34194833-34196805	16.1278	21.1198	0.763634	0.525646	1
Ciclev10002910m.g	AT1G20430.1		scaffold_5:42452913-42455193	83.6721	83.1247	1.00659	0.817205	1
Ciclev10002911m.g	AT4G08230.1	glycine-rich protein	scaffold_5:37128053-37130122	115.011	122.111	0.941856	0.897207	1
Ciclev10002912m.g			scaffold_5:40603739-40604319	0.228378	0.506083	0.451266	1	1
Ciclev10002914m.g	AT5G09250.1	ssDNA-binding transcriptional regulator	scaffold_5:16049005-16051176	27.5596	23.4569	1.1749	0.492038	1
Ciclev10002915m.g	AT1G20460.1		scaffold_5:42495261-42497204	51.3721	52.332	0.981657	0.922585	1
Ciclev10002916m.g	AT1G44414.1		scaffold_5:37433507-37433971	1.42711	0.78837	1.8102	0.617655	1
Ciclev10002917m.g	AT4G24440.1	transcription initiation factor IIA gamma chain / TFIIA-gamma (TFIIA-S)	scaffold_5:35357332-35359897	68.9532	74.0923	0.930639	0.803184	1
Ciclev10002920m.g	AT1G31440.1	SH3 domain-containing protein	scaffold_5:27936514-27938590	22.338	46.0838	0.484726	0.00813148	0.0664174
Ciclev10002921m.g	AT1G31440.1	SH3 domain-containing protein	scaffold_5:28138392-28140825	3.42039	4.97286	0.687811	1	1
Ciclev10002923m.g	AT1G15120.1	Ubiquinol-cytochrome C reductase hinge protein	scaffold_5:38603368-38606636	64.9726	78.1383	0.831508	0.360572	0.950429
Ciclev10002925m.g	AT5G43150.1		scaffold_5:34520507-34522509	15.0764	36.6682	0.411157	0.00840394	0.0681825
Ciclev10002928m.g	AT1G75580.1	SAUR-like auxin-responsive protein family	scaffold_5:41777476-41778540	1e-05	0.288532	3.47e-05	1	1
Ciclev10002929m.g			scaffold_5:24632433-24633328	1e-05	0.232946	4.29e-05	1	1
Ciclev10002933m.g			scaffold_5:37413098-37417182	6.19175	7.56072	0.818937	1	1
Ciclev10002935m.g			scaffold_5:32441852-32442840	4.75868	3.77416	1.26086	0.749386	1
Ciclev10002937m.g	AT2G31305.1	inhibitor-3	scaffold_5:30526755-30528544	204.962	100.039	2.04882	2.97e-10	1.23e-08
Ciclev10002938m.g			scaffold_5:11841897-11842806	3.49275	1.03976	3.35919	0.444228	1
Ciclev10002941m.g	AT3G46730.1	NB-ARC domain-containing disease resistance protein	scaffold_5:4913989-4914545	12.87	15.7215	0.818624	0.712681	1
Ciclev10002943m.g			scaffold_5:16037057-16039385	2.71537	4.38232	0.619619	0.726999	1
Ciclev10002944m.g	AT2G43290.1	Calcium-binding EF-hand family protein	scaffold_5:40239676-40240221	0.441351	0.242542	1.81969	1	1
Ciclev10002945m.g	AT1G77710.1		scaffold_5:37096174-37098369	161.675	184.757	0.875068	0.390877	0.965497
Ciclev10002946m.g			scaffold_5:20865262-20886290	1.12331	0.360997	3.11169	0.617655	1
Ciclev10002947m.g	AT3G05550.1	Hypoxia-responsive family protein	scaffold_5:33399338-33401428	1643.72	1448.1	1.13509	3.99e-06	8.58e-05
Ciclev10002950m.g	AT1G76860.1	Small nuclear ribonucleoprotein family protein	scaffold_5:38639090-38641163	76.5829	103.767	0.738028	0.0873156	0.401677
Ciclev10002952m.g	AT2G33585.1		scaffold_5:43021169-43023077	33.3882	31.9538	1.04489	0.71307	1
Ciclev10002953m.g			scaffold_5:1364434-1365129	1e-05	0.519685	1.92e-05	1	1
Ciclev10002954m.g	AT1G72020.1		scaffold_5:39321822-39323796	181.869	186.687	0.974192	0.917109	1
Ciclev10002955m.g	AT5G10170.1	myo-inositol-1-phosphate synthase 3	scaffold_5:17474652-17476446	10.2793	13.762	0.746934	0.691519	1
Ciclev10002956m.g	AT3G49670.1	Leucine-rich receptor-like protein kinase family protein	scaffold_5:24605014-24605604	0.767811	0.28486	2.6954	1	1
Ciclev10002958m.g	AT1G21930.1		scaffold_5:37155424-37158097	23.765	53.9477	0.440519	0.00138551	0.0154764
Ciclev10002960m.g			scaffold_5:33183579-33184565	28.6181	58.3188	0.490718	0.00270355	0.0270467
Ciclev10002961m.g	AT2G38465.1		scaffold_5:35354185-35354887	5.06147	6.89899	0.733654	1	1
Ciclev10002962m.g			scaffold_5:21809061-21827750	2.76505	3.14754	0.87848	1	1
Ciclev10002963m.g			scaffold_5:30579601-30580104	0.954676	1.44243	0.661853	1	1
Ciclev10002965m.g	AT1G36380.1		scaffold_5:36856825-36859536	16.9313	18.8277	0.899276	0.868885	1
Ciclev10002966m.g			scaffold_5:15706003-15706874	7.73762	11.3724	0.680386	0.505168	1
Ciclev10002967m.g	AT3G04870.1	zeta-carotene desaturase	scaffold_5:30140474-30141670	3.13396	5.32481	0.588558	0.754397	1
Ciclev10002968m.g			scaffold_5:35270445-35271153	1.23334	1e-05	123334	0.617655	1
Ciclev10002969m.g			scaffold_5:17651458-17652769	1.31246	1.49004	0.880822	1	1
Ciclev10002971m.g			scaffold_5:30449357-30450085	1.22177	0.83987	1.45471	0.617655	1
Ciclev10002973m.g	AT1G31812.1	acyl-CoA-binding protein 6	scaffold_5:27598225-27600485	98.9995	137.479	0.720106	0.0271239	0.170144
Ciclev10002974m.g	AT3G04870.1	zeta-carotene desaturase	scaffold_5:29890725-29892233	5.21616	6.25076	0.834484	1	1
Ciclev10002977m.g	AT5G47320.1	ribosomal protein S19	scaffold_5:36984195-36985449	50.9153	121.404	0.419387	2.49e-07	6.7e-06
Ciclev10002978m.g	AT1G66240.1	homolog of anti-oxidant 1	scaffold_5:12470098-12470442	6.66106	14.0492	0.474124	0.135504	0.540952
Ciclev10002979m.g	AT5G59845.1	Gibberellin-regulated family protein	scaffold_5:34404146-34405161	4.67599	10.6085	0.440778	0.211575	0.71254
Ciclev10002980m.g	AT2G22240.2	myo-inositol-1-phosphate synthase 2	scaffold_5:17394016-17394732	0.672858	1.77182	0.379755	1	1
Ciclev10002981m.g	AT1G66240.1	homolog of anti-oxidant 1	scaffold_5:19557276-19557816	2.37657	3.58968	0.662056	1	1
Ciclev10002982m.g	AT5G58375.1	Methyltransferase-related protein	scaffold_5:13193182-13193944	40.4537	44.9502	0.899967	0.829897	1
Ciclev10002984m.g	AT1G75750.1	GAST1 protein homolog 1	scaffold_5:41920801-41921611	161.55	192.509	0.839182	0.221997	0.727265
Ciclev10002987m.g	AT4G25970.1	phosphatidylserine decarboxylase 3	scaffold_5:21802096-21802916	48.1012	46.9321	1.02491	0.759599	1
Ciclev10002988m.g			scaffold_5:36767716-36768536	226.148	1006.3	0.224732	5.62e-111	6.81e-108
Ciclev10002993m.g			scaffold_5:37060930-37065943	1.80223	2.96284	0.608278	1	1
Ciclev10002994m.g			scaffold_5:36764591-36765043	10.0289	5.78171	1.73459	0.229966	0.743434
Ciclev10002996m.g	AT4G21192.1	Cytochrome c oxidase biogenesis protein Cmc1-like	scaffold_5:2206325-2209110	60.3703	46.2667	1.30483	0.12439	0.506829
Ciclev10002998m.g	AT5G64440.1	fatty acid amide hydrolase	scaffold_5:15614150-15615697	7.03008	8.5308	0.824082	1	1
Ciclev10002999m.g			scaffold_5:21379383-21388939	2.68753	2.02255	1.32878	1	1
Ciclev10003000m.g	AT1G09660.1	RNA-binding KH domain-containing protein	scaffold_5:4378312-4381152	30.5066	33.3592	0.914488	0.901469	1
Ciclev10003001m.g	AT5G27700.1	Ribosomal protein S21e	scaffold_5:33268943-33270204	8.16003	8.01303	1.01835	1	1
Ciclev10003006m.g	AT5G27700.1	Ribosomal protein S21e	scaffold_5:33302588-33304334	88.35	108.642	0.813221	0.256451	0.79634
Ciclev10003007m.g			scaffold_5:21785936-21786828	2.33181	0.566222	4.11819	0.365306	0.957432
Ciclev10003010m.g			scaffold_5:226515-230191	5.94031	7.67518	0.773964	0.791112	1
Ciclev10003012m.g	AT1G76065.1	LYR family of Fe/S cluster biogenesis protein	scaffold_5:42288916-42290276	19.907	33.1598	0.600335	0.10153	0.446788
Ciclev10003014m.g	AT1G74340.1	dolichol phosphate-mannose biosynthesis regulatory protein-related	scaffold_5:27143728-27145511	12.9691	17.1068	0.758125	0.475883	1
Ciclev10003015m.g			scaffold_5:17905405-17906193	1.2097	1.0231	1.18239	1	1
Ciclev10003016m.g			scaffold_5:30846774-30848911	0.598183	0.666507	0.897489	1	1
Ciclev10003017m.g			scaffold_5:26171952-26172322	1.28007	0.713346	1.79446	0.617655	1
Ciclev10003019m.g			scaffold_5:40081126-40086638	2.90479	2.13103	1.36309	1	1
Ciclev10003020m.g			scaffold_5:13068545-13069105	12.5363	9.75191	1.28552	0.5349	1
Ciclev10003021m.g			scaffold_5:37339606-37341294	4.01293	5.052	0.794325	1	1
Ciclev10003023m.g	AT5G63905.1		scaffold_5:34657438-34659553	47.9548	63.0409	0.760693	0.219147	0.719758
Ciclev10003025m.g	AT2G23090.1	Uncharacterised protein family SERF	scaffold_5:34499264-34500918	33.6527	47.4844	0.708711	0.185803	0.656108
Ciclev10003027m.g			scaffold_5:24456424-24462454	10.8923	7.8322	1.39071	0.496375	1
Ciclev10003030m.g			scaffold_5:36814201-36816256	0.413184	0.115747	3.56972	1	1
Ciclev10003031m.g			scaffold_5:36766238-36766767	3.35707	4.93375	0.68043	1	1
Ciclev10003032m.g	AT2G02390.2	glutathione S-transferase zeta 1	scaffold_5:181978-183323	1.38851	3.80582	0.364839	0.687874	1
Ciclev10003034m.g			scaffold_5:36769277-36769885	42.5195	43.3507	0.980826	1	1
Ciclev10003035m.g			scaffold_5:22715571-22716418	0.124262	1e-05	12426.2	1	1
Ciclev10003036m.g			scaffold_5:40634800-40636508	12.0756	12.1954	0.990177	1	1
Ciclev10003038m.g			scaffold_5:42405270-42408220	0.657486	1.24697	0.527267	1	1
Ciclev10003039m.g	AT1G78680.1	gamma-glutamyl hydrolase 2	scaffold_5:19275096-19276356	1.98475	1.12046	1.77137	1	1
Ciclev10003041m.g			scaffold_5:26960451-26976490	0.796916	0.720996	1.1053	1	1
Ciclev10003043m.g			scaffold_5:36023351-36024604	0.0866714	0.389716	0.222396	1	1
Ciclev10003044m.g	AT1G14450.1	NADH dehydrogenase (ubiquinone)s	scaffold_5:510352-512600	6.35647	4.3212	1.471	0.574186	1
Ciclev10003046m.g	AT1G14450.1	NADH dehydrogenase (ubiquinone)s	scaffold_5:427419-429934	39.4011	38.4817	1.02389	0.82228	1
Ciclev10003047m.g	AT1G22140.1		scaffold_5:36703531-36705350	64.3303	91.1516	0.705751	0.0660202	0.332039
Ciclev10003048m.g			scaffold_5:19136292-19146196	0.364021	0.136696	2.663	1	1
Ciclev10003049m.g	AT1G09630.1	RAB GTPase 11C	scaffold_5:3004723-3008333	9.41261	12.9716	0.725632	0.679052	1
Ciclev10003050m.g			scaffold_5:13065623-13067243	9.30372	5.29965	1.75553	0.324014	0.900024
Ciclev10003051m.g			scaffold_5:38056868-38057449	11.9077	34.4924	0.345227	0.00120393	0.0138067
Ciclev10003057m.g	AT5G41685.1	Mitochondrial outer membrane translocase complex, subunit Tom7	scaffold_5:39402262-39404061	16.9302	13.6883	1.23684	0.59146	1
Ciclev10003062m.g			scaffold_5:32315667-32316415	0.189549	1e-05	18954.9	1	1
Ciclev10003063m.g			scaffold_5:33659128-33660712	6.30097	5.15332	1.2227	0.78685	1
Ciclev10003065m.g			scaffold_5:29590361-29592399	1.01016	2.71735	0.371745	1	1
Ciclev10003066m.g			scaffold_5:27835482-27837426	22.4951	36.4675	0.616853	0.120658	0.495587
Ciclev10003067m.g			scaffold_5:27805276-27812705	0.353305	0.395343	0.893667	1	1
Ciclev10003069m.g			scaffold_5:1399885-1400682	6.39957	2.70916	2.3622	0.218039	0.723111
Ciclev10003072m.g			scaffold_5:34198473-34199120	1.21205	0.219912	5.51152	0.617655	1
Ciclev10003073m.g			scaffold_5:3023525-3024613	1.69255	1.66052	1.01929	1	1
Ciclev10003075m.g			scaffold_5:6945620-6945891	5.22357	7.93113	0.658616	0.791112	1
Ciclev10003076m.g			scaffold_5:17021241-17021864	13.5063	13.0285	1.03667	1	1
Ciclev10003077m.g			scaffold_5:33082946-33084096	0.719365	0.162373	4.43032	1	1
Ciclev10003078m.g			scaffold_5:16990298-16991250	22.3248	22.6458	0.985825	1	1
Ciclev10003081m.g			scaffold_5:183435-184391	1.09179	2.663	0.409985	1	1
Ciclev10003083m.g			scaffold_5:42941241-42942396	160.192	286.894	0.558367	2.74e-08	8.62e-07
Ciclev10003084m.g	AT3G11591.1		scaffold_5:11913693-11914695	12.3753	29.6834	0.41691	0.0145181	0.104866
Ciclev10003086m.g			scaffold_5:10471177-10472505	27.9327	32.972	0.847164	0.701305	1
Ciclev10003088m.g	AT5G15320.1		scaffold_5:41715561-41717774	8.44705	16.4207	0.514415	0.170847	0.628755
Ciclev10003091m.g	AT1G71910.1		scaffold_5:39466847-39468398	0.591123	0.330759	1.78717	1	1
Ciclev10003094m.g	AT3G57230.1	AGAMOUS-like 16	scaffold_5:35277060-35279939	0.462335	1e-05	46233.5	1	1
Ciclev10003097m.g	AT5G59240.1	Ribosomal protein S8e family protein	scaffold_5:32816625-32817712	0.953545	3.17527	0.300304	0.375499	0.961622
Ciclev10003101m.g	AT2G20142.1	Toll-Interleukin-Resistance (TIR) domain family protein	scaffold_5:6099600-6100071	6.39783	15.5208	0.41221	0.0946324	0.425132
Ciclev10003104m.g	AT3G50940.1	P-loop containing nucleoside triphosphate hydrolases superfamily protein	scaffold_5:41252803-41257611	1e-05	0.53579	1.87e-05	1	1
Ciclev10003106m.g	AT5G27440.1		scaffold_5:32718844-32719516	2.13036	0.853546	2.49589	0.365306	0.957432
Ciclev10003108m.g			scaffold_5:24278920-24280261	0.318033	0.176413	1.80278	1	1
Ciclev10003110m.g	AT3G06410.1	Zinc finger C-x8-C-x5-C-x3-H type family protein	scaffold_5:6103258-6105114	2.79044	2.60262	1.07217	1	1
Ciclev10003112m.g	AT5G63920.1	topoisomerase 3alpha	scaffold_5:16138325-16152068	0.721314	0.497642	1.44946	1	1
Ciclev10003116m.g	AT1G80480.1	plastid transcriptionally active 17	scaffold_5:25797301-25800624	6.44055	14.4582	0.44546	0.135504	0.540952
Ciclev10003118m.g	AT1G09935.1	Phosphoglycerate mutase family protein	scaffold_5:35192900-35194686	0.612687	0.682774	0.89735	1	1
Ciclev10003120m.g	AT3G56850.1	ABA-responsive element binding protein 3	scaffold_5:36814201-36816256	0.103566	0.23179	0.44681	1	1
Ciclev10003121m.g	AT4G27190.1	NB-ARC domain-containing disease resistance protein	scaffold_5:25216207-25218151	3.21736	1.36893	2.35027	0.444228	1
Ciclev10003126m.g	AT1G31440.1	SH3 domain-containing protein	scaffold_5:28467587-28469658	12.1176	33.1835	0.365169	0.00336128	0.0324042
Ciclev10003127m.g	AT5G13930.1	Chalcone and stilbene synthase family protein	scaffold_5:37161363-37162615	0.123238	0.275112	0.447956	1	1
Ciclev10003128m.g	AT4G27190.1	NB-ARC domain-containing disease resistance protein	scaffold_5:32333983-32338708	0.158263	0.0354141	4.46893	1	1
Ciclev10003129m.g	AT1G16380.1	Cation/hydrogen exchanger family protein	scaffold_5:19032658-19035265	0.091168	1e-05	9116.8	1	1
Ciclev10003131m.g	AT1G09890.1	Rhamnogalacturonate lyase family protein	scaffold_5:35337109-35341788	4.75468	4.69069	1.01364	1	1
Ciclev10003132m.g	AT4G27190.1	NB-ARC domain-containing disease resistance protein	scaffold_5:29878517-29880917	21.8605	5.82284	3.75427	0.00198315	0.0209209
Ciclev10003135m.g	AT4G27190.1	NB-ARC domain-containing disease resistance protein	scaffold_5:25707436-25711484	0.0689132	0.0772985	0.891521	1	1
Ciclev10003136m.g			scaffold_5:1208259-1209032	1.20777	1.8047	0.669236	1	1
Ciclev10003137m.g	AT4G21110.1	G10 family protein	scaffold_5:27375251-27377371	19.9112	19.3115	1.03105	1	1
Ciclev10003138m.g	AT5G42830.1	HXXXD-type acyl-transferase family protein	scaffold_5:39999082-40000451	13.6477	2.10985	6.46856	0.00657392	0.0560608
Ciclev10003139m.g	AT1G27040.1	Major facilitator superfamily protein	scaffold_5:40520611-40523614	0.175394	0.13055	1.3435	1	1
Ciclev10003140m.g	AT4G32640.1	Sec23/Sec24 protein transport family protein	scaffold_5:9452924-9454877	0.304605	1e-05	30460.5	1	1
Ciclev10003142m.g			scaffold_5:40297491-40299711	21.3584	25.2475	0.845961	0.668481	1
Ciclev10003143m.g	AT1G71865.1		scaffold_5:39588843-39589143	12.6978	24.7829	0.512361	0.075114	0.363605
Ciclev10003146m.g	ATCG00680.1	photosystem II reaction center protein B	scaffold_5:22620030-22620962	1.2151	3.0482	0.398629	0.687874	1
Ciclev10003147m.g	AT4G31980.1		scaffold_5:25032627-25033680	3.9862	2.29334	1.73816	0.721429	1
Ciclev10003149m.g	AT1G45150.1		scaffold_5:40900501-40909351	19.577	16.1078	1.21537	0.622693	1
Ciclev10003152m.g	AT1G21250.1	cell wall-associated kinase	scaffold_5:5813160-5813991	0.625504	1e-05	62550.4	1	1
Ciclev10003153m.g	AT1G12700.1	ATP binding;nucleic acid binding;helicases	scaffold_5:27391368-27393349	1.02532	2.07351	0.494485	1	1
Ciclev10003154m.g	AT4G27190.1	NB-ARC domain-containing disease resistance protein	scaffold_5:30272100-30273945	1e-05	0.0957994	0.000104385	1	1
Ciclev10003155m.g	AT1G61310.1	LRR and NB-ARC domains-containing disease resistance protein	scaffold_5:25398590-25400294	0.294743	0.0825848	3.56897	1	1
Ciclev10003159m.g	AT4G27190.1	NB-ARC domain-containing disease resistance protein	scaffold_5:30507659-30511514	0.187033	0.27728	0.674528	1	1
Ciclev10003161m.g	AT5G42146.1		scaffold_5:41932894-41936414	27.5723	55.2434	0.499106	0.00436198	0.0401709
Ciclev10003162m.g	AT4G35790.2	phospholipase D delta	scaffold_5:6770613-6775131	0.0364786	0.122538	0.297692	1	1
Ciclev10003164m.g	AT4G27190.1	NB-ARC domain-containing disease resistance protein	scaffold_5:23135253-23141855	1.49889	0.200284	7.48382	0.617655	1
Ciclev10003165m.g	AT3G57730.1	Protein kinase superfamily protein	scaffold_5:33149858-33150849	1.06223	0.681123	1.55953	0.617655	1
Ciclev10003166m.g	AT4G14140.2	DNA methyltransferase 2	scaffold_5:1875695-1877290	0.19289	0.216611	0.89049	1	1
Ciclev10003169m.g	AT1G47278.2		scaffold_5:42066773-42069123	8.40045	12.8098	0.655783	0.52531	1
Ciclev10003172m.g	AT2G13440.1	glucose-inhibited division family A protein	scaffold_5:16426017-16432398	5.47533	3.65713	1.49717	0.541376	1
Ciclev10003175m.g	AT1G09130.1	ATP-dependent caseinolytic (Clp) protease/crotonase family protein	scaffold_5:33322028-33325343	85.0378	87.7179	0.969446	0.939627	1
Ciclev10003176m.g	AT4G27190.1	NB-ARC domain-containing disease resistance protein	scaffold_5:31798469-31803028	1.57585	1.04864	1.50276	1	1
Ciclev10003180m.g	AT2G47110.1	ubiquitin 6	scaffold_5:21429644-21429887	2.16624	2.37231	0.913135	1	1
Ciclev10003182m.g	AT4G37970.1	cinnamyl alcohol dehydrogenase 6	scaffold_5:38227734-38228941	0.538634	1e-05	53863.4	1	1
Ciclev10003183m.g	AT2G38010.1	Neutral/alkaline non-lysosomal ceramidase	scaffold_5:42484752-42488408	1e-05	0.036752	0.000272094	1	1
Ciclev10003185m.g	AT1G34630.1		scaffold_5:36401952-36405327	12.7393	10.5517	1.20732	0.685477	1
Ciclev10003186m.g	AT3G23090.1	TPX2 (targeting protein for Xklp2) protein family	scaffold_5:29751-30872	1.60625	0.597637	2.68767	0.617655	1
Ciclev10003188m.g	AT4G26090.1	NB-ARC domain-containing disease resistance protein	scaffold_5:32643454-32646430	0.292839	0.196203	1.49253	1	1
Ciclev10003189m.g	AT4G20820.1	FAD-binding Berberine family protein	scaffold_5:3148560-3150216	0.839079	0.626029	1.34032	1	1
Ciclev10003190m.g			scaffold_5:33712170-33714440	15.0742	1e-05	1507420	0.000111847	0.00172246
Ciclev10003191m.g	AT1G56230.1	Protein of unknown function (DUF1399)	scaffold_5:33705152-33709918	1.19769	1.51763	0.789184	1	1
Ciclev10003193m.g	AT3G17380.1	TRAF-like family protein	scaffold_5:27263742-27265461	11.4125	7.16185	1.59351	0.375548	0.955555
Ciclev10003194m.g	AT4G24580.1	Rho GTPase activation protein (RhoGAP) with PH domain	scaffold_5:35724168-35734729	0.712149	0.10364	6.87137	1	1
Ciclev10003196m.g	AT5G27220.1	Frigida-like protein	scaffold_5:31340417-31341708	4.1727	1.83985	2.26796	0.279817	0.833852
Ciclev10003200m.g	AT1G45616.1	receptor like protein 6	scaffold_5:19882823-19886260	0.275796	0.155181	1.77725	1	1
Ciclev10003202m.g	ATCG00650.1	ribosomal protein S18	scaffold_5:22625617-22628186	1.62464	1.84186	0.882065	1	1
Ciclev10003203m.g	AT5G07040.1	RING/U-box superfamily protein	scaffold_5:20777927-20778458	1.3683	0.906763	1.50899	0.617655	1
Ciclev10003207m.g	AT5G45610.1	protein dimerizations	scaffold_5:26144303-26147290	9.89922	12.023	0.823357	0.679052	1
Ciclev10003209m.g	AT4G31980.1		scaffold_5:25346696-25347971	2.10463	1.60223	1.31356	0.681506	1
Ciclev10003214m.g	AT1G15690.1	Inorganic H pyrophosphatase family protein	scaffold_5:33986603-33987724	3.69087	0.992274	3.71961	0.209754	0.713732
Ciclev10003215m.g	AT4G39530.1	Tetratricopeptide repeat (TPR)-like superfamily protein	scaffold_5:3627433-3629258	2.61767	4.14997	0.630768	0.726999	1
Ciclev10003219m.g	AT5G65810.1		scaffold_5:34850447-34852585	0.685587	0.770742	0.889516	1	1
Ciclev10003220m.g	AT4G09510.1	cytosolic invertase 2	scaffold_5:39331614-39333848	185.115	86.9629	2.12867	1.93e-10	8.24e-09
Ciclev10003222m.g	AT5G08450.1		scaffold_5:25577278-25579614	1.26492	3.22436	0.392301	0.687874	1
Ciclev10003223m.g	AT3G04940.1	cysteine synthase D1	scaffold_5:30703989-30705227	1e-05	0.808042	1.24e-05	1	1
Ciclev10003224m.g	AT1G54730.2	Major facilitator superfamily protein	scaffold_5:32114876-32118032	1e-05	0.099158	0.000100849	1	1
Ciclev10003225m.g	AT2G22740.1	SU(VAR)3-9 homolog 6	scaffold_5:1451512-1452671	0.310889	0.0867456	3.58392	1	1
Ciclev10003228m.g	AT4G27190.1	NB-ARC domain-containing disease resistance protein	scaffold_5:29898786-29900442	2.03548	0.787385	2.58511	0.365306	0.957432
Ciclev10003230m.g	AT5G64410.1	oligopeptide transporter 4	scaffold_5:35250275-35255004	1e-05	0.0497821	0.000200875	1	1
Ciclev10003233m.g	AT3G53160.1	UDP-glucosyl transferase 73C7	scaffold_5:36407963-36409504	0.544943	0.602187	0.90494	1	1
Ciclev10003235m.g	AT5G27220.1	Frigida-like protein	scaffold_5:31359782-31362899	6.62032	2.25881	2.93089	0.218039	0.723111
Ciclev10003237m.g	AT3G57340.1	Heat shock protein DnaJ, N-terminal with domain of unknown function (DUF1977)	scaffold_5:2512702-2513018	9.38102	1e-05	938102	0.0054745	0.0488591
Ciclev10003239m.g	AT5G65240.1	Leucine-rich repeat protein kinase family protein	scaffold_5:33065670-33067277	0.837068	1.17136	0.714612	1	1
Ciclev10003241m.g	AT5G42320.1	Zn-dependent exopeptidases superfamily protein	scaffold_5:42630188-42633313	85.0331	61.9892	1.37174	0.0321894	0.194179
Ciclev10003243m.g	AT3G26040.1	HXXXD-type acyl-transferase family protein	scaffold_5:17934315-17935705	17.0411	13.1231	1.29856	0.480826	1
Ciclev10003245m.g			scaffold_5:10617645-10618098	5.5658	14.2414	0.390818	0.0795932	0.378566
Ciclev10003246m.g	AT1G17250.1	receptor like protein 3	scaffold_5:9125380-9131852	3.42341	0.856914	3.99505	0.209754	0.713732
Ciclev10003247m.g	AT1G32160.1	Protein of unknown function (DUF760)	scaffold_5:26611274-26611664	25.5924	35.8156	0.71456	0.309761	0.874615
Ciclev10003249m.g	AT2G30600.1	BTB/POZ domain-containing protein	scaffold_5:42669528-42674387	20.4268	20.6667	0.988392	1	1
Ciclev10003250m.g	AT2G21520.2	Sec14p-like phosphatidylinositol transfer family protein	scaffold_5:10484325-10485015	5.49896	6.18828	0.888609	1	1
Ciclev10003253m.g	AT3G17380.1	TRAF-like family protein	scaffold_5:11514115-11515698	0.115022	0.256104	0.449122	1	1
Ciclev10003256m.g	AT1G31885.1	NOD26-like intrinsic protein 3;1	scaffold_5:36371906-36378249	0.453108	0.169975	2.66573	1	1
Ciclev10003258m.g	AT4G18750.1	Pentatricopeptide repeat (PPR) superfamily protein	scaffold_5:3896069-3898178	1.35529	2.45034	0.553103	1	1
Ciclev10003259m.g			scaffold_5:1172737-1174327	6.34868	10.867	0.584216	0.482279	1
Ciclev10003265m.g	AT1G77480.1	Eukaryotic aspartyl protease family protein	scaffold_5:37544496-37560859	6.53696	9.25378	0.70641	0.630241	1
Ciclev10003266m.g	AT2G15080.1	receptor like protein 19	scaffold_5:1394126-1395942	0.229314	0.171806	1.33473	1	1
Ciclev10003271m.g	AT1G58190.2	receptor like protein 9	scaffold_5:28255609-28257766	2.48817	2.07522	1.19899	1	1
Ciclev10003274m.g	AT3G08550.1	elongation defective 1 protein / ELD1 protein	scaffold_5:20245543-20245784	765.139	644.901	1.18644	7.13e-05	0.00116296
Ciclev10003278m.g			scaffold_5:38762885-38763568	1e-05	0.207083	4.83e-05	1	1
Ciclev10003283m.g	AT4G27190.1	NB-ARC domain-containing disease resistance protein	scaffold_5:23091635-23095149	0.515538	0.215327	2.39421	1	1
Ciclev10003285m.g	AT4G27190.1	NB-ARC domain-containing disease resistance protein	scaffold_5:31740513-31742061	0.225571	0.126406	1.7845	1	1
Ciclev10003286m.g	AT4G33440.1	Pectin lyase-like superfamily protein	scaffold_5:17805800-17809117	1.06307	2.14025	0.496704	1	1
Ciclev10003291m.g	AT3G55440.1	triosephosphate isomerase	scaffold_5:12064498-12066427	3.54311	5.62491	0.629896	0.754397	1
Ciclev10003293m.g	AT5G17680.1	disease resistance protein (TIR-NBS-LRR class), putative	scaffold_5:7237869-7240251	6.06469	7.58611	0.799447	1	1
Ciclev10003294m.g	AT1G19690.1	NAD(P)-binding Rossmann-fold superfamily protein	scaffold_5:41347083-41349587	8.55193	8.8483	0.966505	1	1
Ciclev10003300m.g	AT2G18950.1	homogentisate phytyltransferase 1	scaffold_5:9053339-9055168	40.0538	5.61512	7.1332	6.89e-08	2.04e-06
Ciclev10003301m.g	AT1G22060.1		scaffold_5:36751452-36759896	5.2799	3.39729	1.55415	0.541376	1
Ciclev10003302m.g	AT5G59240.1	Ribosomal protein S8e family protein	scaffold_5:11911913-11913031	2.04359	6.79227	0.30087	0.344732	0.927493
Ciclev10003304m.g			scaffold_5:40993519-40993992	413.497	375.686	1.10065	0.0591556	0.308578
Ciclev10003306m.g	AT1G76860.1	Small nuclear ribonucleoprotein family protein	scaffold_5:6028330-6034400	14.933	5.57244	2.6798	0.0487463	0.266487
Ciclev10003311m.g	AT1G09740.1	Adenine nucleotide alpha hydrolases-like superfamily protein	scaffold_5:35696622-35698389	0.674143	1e-05	67414.3	1	1
Ciclev10003312m.g	AT4G09680.1	conserved telomere maintenance component 1	scaffold_5:40463922-40469054	6.38162	4.17872	1.52717	0.574186	1
Ciclev10003314m.g	AT1G07710.1	Ankyrin repeat family protein	scaffold_5:4840405-4842577	0.127881	0.14396	0.888309	1	1
Ciclev10003317m.g	AT1G59750.1	auxin response factor 1	scaffold_5:1180918-1184934	18.0961	8.13803	2.22365	0.0576645	0.303169
Ciclev10003319m.g	AT1G60680.1	NAD(P)-linked oxidoreductase superfamily protein	scaffold_5:29650080-29650386	4.62032	5.18447	0.891185	1	1
Ciclev10003328m.g	AT1G77130.1	plant glycogenin-like starch initiation protein 2	scaffold_5:38374950-38378462	14.3032	12.6382	1.13174	0.707021	1
Ciclev10003329m.g	ATCG00670.1	plastid-encoded CLP P	scaffold_5:22622896-22623133	13.6875	4.50288	3.03972	0.038109	0.220872
Ciclev10003330m.g	AT1G45616.1	receptor like protein 6	scaffold_5:20040315-20043358	0.364437	0.318871	1.1429	1	1
Ciclev10003331m.g	AT5G02920.1	F-box/RNI-like superfamily protein	scaffold_5:17654268-17654919	2.30434	1.66372	1.38505	0.681506	1
Ciclev10003334m.g	AT1G27750.1	nucleic acid binding	scaffold_5:34574495-34586406	7.47072	2.77782	2.68942	0.138749	0.546024
Ciclev10003335m.g	AT3G05030.1	sodium hydrogen exchanger 2	scaffold_5:31880803-31884455	0.0732738	0.0820863	0.892643	1	1
Ciclev10003339m.g	AT5G06990.1	Protein of unknown function, DUF617	scaffold_5:21093707-21094469	0.724893	0.318795	2.27385	1	1
Ciclev10003341m.g	AT5G28540.1	heat shock protein 70 (Hsp 70) family protein	scaffold_5:33427974-33430151	1e-05	0.622453	1.61e-05	1	1
Ciclev10003343m.g	AT3G63470.1	serine carboxypeptidase-like 40	scaffold_5:40406627-40408591	0.358374	1.09957	0.325922	1	1
Ciclev10003346m.g	AT1G09820.1	Pentatricopeptide repeat (PPR-like) superfamily protein	scaffold_5:34020542-34022577	1.91997	3.44237	0.557747	0.687874	1
Ciclev10003349m.g	AT3G02120.1	hydroxyproline-rich glycoprotein family protein	scaffold_5:35348369-35348723	0.559812	0.617773	0.906178	1	1
Ciclev10003350m.g	AT4G21390.1	S-locus lectin protein kinase family protein	scaffold_5:32083469-32087444	6.81227	4.48801	1.51788	0.574186	1
Ciclev10003351m.g	AT1G78190.1	Trm112p-like protein	scaffold_5:36400903-36401275	26.3685	25.8783	1.01894	0.78546	1
Ciclev10003355m.g			scaffold_5:21016539-21021020	1.51056	0.611879	2.46872	0.617655	1
Ciclev10003362m.g	AT1G19715.3	Mannose-binding lectin superfamily protein	scaffold_5:41424594-41428360	0.941584	0.980218	0.960586	1	1
Ciclev10003364m.g	AT1G76460.1	RNA-binding (RRM/RBD/RNP motifs) family protein	scaffold_5:42992090-42995139	15.2155	8.67728	1.75349	0.162169	0.606036
Ciclev10003367m.g	AT3G57730.1	Protein kinase superfamily protein	scaffold_5:33114805-33117323	0.456264	1e-05	45626.4	1	1
Ciclev10003371m.g	AT1G20925.1	Auxin efflux carrier family protein	scaffold_5:2591144-2592311	1e-05	1.00159	9.98e-06	1	1
Ciclev10003372m.g	AT3G25230.1	rotamase FKBP 1	scaffold_5:34757530-34762152	10.4887	7.1503	1.46689	0.496375	1
Ciclev10003377m.g			scaffold_5:30246767-30247043	6.57797	9.19224	0.7156	0.630241	1
Ciclev10003379m.g	AT5G64530.1	xylem NAC domain 1	scaffold_5:17138599-17139487	0.216528	0.242209	0.893972	1	1
Ciclev10003381m.g	AT1G76240.1	Arabidopsis protein of unknown function (DUF241)	scaffold_5:42565118-42566009	0.300037	1.32468	0.226498	1	1
Ciclev10003382m.g	AT3G04820.1	Pseudouridine synthase family protein	scaffold_5:29850226-29857314	21.6115	23.5992	0.915773	0.884065	1
Ciclev10003384m.g	AT5G42820.1	Zinc finger C-x8-C-x5-C-x3-H type family protein	scaffold_5:43076052-43077027	16.9398	14.295	1.18502	0.724721	1
Ciclev10003386m.g	AT4G13810.1	receptor like protein 47	scaffold_5:19894167-19896498	1.26133	0.820473	1.53732	0.617655	1
Ciclev10003393m.g	ATCG00720.1	photosynthetic electron transfer B	scaffold_5:22617700-22618087	5.7079	3.506	1.62804	0.541376	1
Ciclev10003397m.g	AT2G21830.1	Cysteine/Histidine-rich C1 domain family protein	scaffold_5:7520200-7521635	22.4987	44.5645	0.504857	0.0147391	0.10587
Ciclev10003399m.g	AT3G14690.1	cytochrome P450, family 72, subfamily A, polypeptide 15	scaffold_5:33348110-33349960	0.894343	0.267419	3.34435	1	1
Ciclev10003403m.g	AT5G48910.1	Pentatricopeptide repeat (PPR) superfamily protein	scaffold_5:34142654-34144546	0.263521	0.2463	1.06992	1	1
Ciclev10003404m.g			scaffold_5:25847665-25849798	0.0872211	0.0971328	0.897957	1	1
Ciclev10003407m.g	AT5G24560.1	phloem protein 2-B12	scaffold_5:8209932-8212187	42.8294	50.8177	0.842805	0.537879	1
Ciclev10003408m.g	AT3G09040.1	Pentatricopeptide repeat (PPR) superfamily protein	scaffold_5:38357215-38360227	1.9902	0.666273	2.98706	0.617655	1
Ciclev10003409m.g	AT1G35710.1	Protein kinase family protein with leucine-rich repeat domain	scaffold_5:36436713-36440330	2.8833	0.372731	7.73561	0.365306	0.957432
Ciclev10003410m.g	AT4G27190.1	NB-ARC domain-containing disease resistance protein	scaffold_5:30470118-30472503	1e-05	0.0705146	0.000141815	1	1
Ciclev10003411m.g	AT4G27190.1	NB-ARC domain-containing disease resistance protein	scaffold_5:30398718-30401121	0.218897	0.139679	1.56714	1	1
Ciclev10003413m.g	AT4G27190.1	NB-ARC domain-containing disease resistance protein	scaffold_5:30430152-30432468	0.388707	0.253155	1.53545	1	1
Ciclev10003414m.g	AT4G27190.1	NB-ARC domain-containing disease resistance protein	scaffold_5:30344949-30348526	0.515339	0.236889	2.17545	1	1
Ciclev10003415m.g	AT1G10320.1	Zinc finger C-x8-C-x5-C-x3-H type family protein	scaffold_5:1136764-1143725	3.63219	1.94142	1.87089	0.444228	1
Ciclev10003416m.g	AT4G27190.1	NB-ARC domain-containing disease resistance protein	scaffold_5:25587441-25590126	2.61792	1.26838	2.06399	0.681506	1
Ciclev10003419m.g	AT1G72300.1	Leucine-rich receptor-like protein kinase family protein	scaffold_5:32931029-32934227	10.3973	2.21554	4.6929	0.0320582	0.193993
Ciclev10003420m.g	AT1G15690.1	Inorganic H pyrophosphatase family protein	scaffold_5:33984780-33986191	2.7859	1.62961	1.70955	0.681506	1
Ciclev10003421m.g	AT1G34340.1	alpha/beta-Hydrolases superfamily protein	scaffold_5:6013082-6016292	11.8204	7.721	1.53094	0.375548	0.955555
Ciclev10003422m.g	AT4G10130.1	DNAJ heat shock N-terminal domain-containing protein	scaffold_5:40296378-40296927	26.9569	14.2035	1.89791	0.0628077	0.320124
Ciclev10003424m.g	ATCG00670.1	plastid-encoded CLP P	scaffold_5:22623800-22624025	13.2779	7.49509	1.77155	0.202825	0.698132
Ciclev10003429m.g	AT3G13690.1	Protein kinase protein with adenine nucleotide alpha hydrolases-like domain	scaffold_5:38095623-38100811	0.152951	0.0569347	2.68643	1	1
Ciclev10003434m.g			scaffold_5:24227816-24228470	0.20772	0.233769	0.888569	1	1
Ciclev10003435m.g	AT1G08845.2	Ribosomal L18p/L5e family protein	scaffold_5:31435161-31435602	1e-05	1.30818	7.64e-06	1	1
Ciclev10003438m.g	AT5G56790.1	Protein kinase superfamily protein	scaffold_5:19746687-19749407	0.0449013	0.150644	0.298062	1	1
Ciclev10003439m.g	AT1G01950.3	armadillo repeat kinesin 2	scaffold_5:8272773-8273300	8.64653	19.5248	0.442849	0.062918	0.320265
Ciclev10003447m.g	AT1G31440.1	SH3 domain-containing protein	scaffold_5:28183583-28185706	15.2845	29.1673	0.524029	0.0562714	0.297868
Ciclev10003448m.g	AT1G78160.1	pumilio 7	scaffold_5:34391102-34395047	1e-05	0.243492	4.11e-05	1	1
Ciclev10003449m.g	AT5G10860.1	Cystathionine beta-synthase (CBS) family protein	scaffold_5:14888277-14889824	114.848	187.966	0.611004	0.000113875	0.00174813
Ciclev10003452m.g	AT3G22910.1	ATPase E1-E2 type family protein / haloacid dehalogenase-like hydrolase family protein	scaffold_5:16198486-16201340	1.42513	1.43896	0.990389	1	1
Ciclev10003453m.g	AT4G27190.1	NB-ARC domain-containing disease resistance protein	scaffold_5:30445359-30448160	0.0300746	1e-05	3007.46	1	1
Ciclev10003454m.g	AT2G13600.1	Pentatricopeptide repeat (PPR) superfamily protein	scaffold_5:42932101-42934392	0.328563	0.642416	0.511449	1	1
Ciclev10003455m.g	AT4G34370.1	RING/U-box superfamily protein	scaffold_5:40680282-40682679	18.5333	23.277	0.796207	0.545858	1
Ciclev10003457m.g	AT1G71696.2	carboxypeptidase D, putative	scaffold_5:39079124-39085630	21.6823	23.807	0.910753	0.884065	1
Ciclev10003461m.g	AT1G32080.1	membrane protein, putative	scaffold_5:25932192-25937154	49.883	55.3021	0.902009	0.770886	1
Ciclev10003463m.g	AT1G31130.1		scaffold_5:17572998-17573997	4.20721	1.28679	3.26954	0.279817	0.833852
Ciclev10003464m.g	AT1G07390.3	receptor like protein 1	scaffold_5:28464544-28466173	76.6445	16.5953	4.61845	6e-11	2.7e-09
Ciclev10003466m.g	AT1G09910.1	Rhamnogalacturonate lyase family protein	scaffold_5:35313612-35319775	6.58085	5.25883	1.25139	0.78685	1
Ciclev10003468m.g	AT5G27370.1	Protein of unknown function (DUF679)	scaffold_5:31918502-31919186	5.95474	3.65707	1.62828	0.541376	1
Ciclev10003470m.g	AT3G02120.1	hydroxyproline-rich glycoprotein family protein	scaffold_5:11710509-11711116	0.993721	3.31383	0.299871	0.375499	0.961622
Ciclev10003471m.g	AT3G57490.1	Ribosomal protein S5 family protein	scaffold_5:6255728-6257807	18.2103	15.107	1.20542	0.613073	1
Ciclev10003472m.g	AT5G50010.1	sequence-specific DNA binding transcription factors;transcription regulators	scaffold_5:35812307-35813426	45.6206	28.8356	1.58209	0.0372444	0.216966
Ciclev10003473m.g	AT1G45160.2	Protein kinase superfamily protein	scaffold_5:40917529-40927071	31.2304	9.27939	3.36557	0.000516309	0.00670336
Ciclev10003474m.g	AT4G37810.1		scaffold_5:34942041-34942266	24.9974	12.4465	2.00839	0.0502623	0.273002
[truncated: 17,360 more rows]

## Sheet: Canton lemon vs. Red tangerine
All the differentially expressed unigenes and their FPKM values in Canton lemon vs. Red tangerine
Gene_name	AGI(Arabidopsis Genome Initiative)	Description	Locus	Canton lemon_FPKM	Red tangerine_FPKM	Fold_change-Canton lemon/Red tangerine	p-value	FDR
Ciclev10000001m.g	AT1G55860.2	ubiquitin-protein ligase 1	scaffold_5:35379209-35394765	35.9885	22.013	1.63487	0.036135	0.396432
Ciclev10000002m.g	AT1G58230.1	binding	scaffold_5:35462072-35488434	15.653	13.2796	1.17873	0.583924	1
Ciclev10000004m.g	AT1G58250.1	Golgi-body localisation protein domain ;RNA pol II promoter Fmp27 protein domain	scaffold_5:35420547-35440993	14.0519	11.2222	1.25215	0.44168	1
Ciclev10000005m.g	AT1G77300.1	histone methyltransferases(H3-K4 specific);histone methyltransferases(H3-K36 specific)	scaffold_5:37817189-37832291	12.3833	9.37779	1.32049	0.406509	1
Ciclev10000006m.g	AT5G24350.1		scaffold_5:13242991-13256142	8.42297	6.30343	1.33625	0.465725	1
Ciclev10000007m.g	AT1G36160.1	acetyl-CoA carboxylase 1	scaffold_5:36660140-36674263	13.1322	8.92296	1.47173	0.211851	1
Ciclev10000008m.g	AT4G22970.1	homolog of separase	scaffold_5:12226123-12245736	6.92949	5.71622	1.21225	0.782591	1
Ciclev10000009m.g	AT1G21580.1	Zinc finger C-x8-C-x5-C-x3-H type family protein	scaffold_5:37855729-37864590	20.326	15.1541	1.34129	0.251193	1
Ciclev10000010m.g	AT1G77460.1	Armadillo/beta-catenin-like repeat ; C2 calcium/lipid-binding domain (CaLB) protein	scaffold_5:37569451-37578288	8.83787	4.02317	2.19674	0.283995	1
Ciclev10000011m.g	AT4G16310.1	LSD1-like 3	scaffold_5:41621905-41632132	9.32193	6.82046	1.36676	0.342342	1
Ciclev10000013m.g	AT5G42950.1	GYF domain-containing protein	scaffold_5:40957570-40966096	23.5773	16.8593	1.39847	0.159034	0.99572
Ciclev10000014m.g	AT3G04740.1	RNA polymerase II transcription mediators	scaffold_5:29424164-29437482	14.7716	9.06521	1.62948	0.230042	1
Ciclev10000015m.g	AT5G58410.1	HEAT/U-box domain-containing protein	scaffold_5:12783975-12798505	12.0954	9.94776	1.21589	0.406509	1
Ciclev10000018m.g	AT2G13680.1	callose synthase 5	scaffold_5:18122994-18137457	4.28824	3.92151	1.09352	0.742562	1
Ciclev10000021m.g	AT1G34260.1	FORMS APLOID AND BINUCLEATE CELLS 1A	scaffold_5:39593308-39602756	35.3402	24.1194	1.46522	0.0716717	0.627351
Ciclev10000022m.g	AT5G27970.1	ARM repeat superfamily protein	scaffold_5:30707094-30725682	18.9964	12.0854	1.57185	0.161548	1
Ciclev10000023m.g	AT5G13530.1	protein kinases;ubiquitin-protein ligases	scaffold_5:21434576-21450040	20.7399	16.0997	1.28822	0.331583	1
Ciclev10000024m.g	AT1G71220.1	UDP-glucose:glycoprotein glucosyltransferases;transferases, transferring hexosyl groups;transferases, transferring glycosyl groups	scaffold_5:8636099-8657848	48.1786	40.5127	1.18922	0.169638	1
Ciclev10000026m.g	AT1G33410.2	SUPPRESSOR OF AUXIN RESISTANCE1	scaffold_5:64758-82168	21.0459	17.9788	1.1706	0.343136	1
Ciclev10000027m.g	AT1G77800.1	PHD finger family protein	scaffold_5:36903339-36915125	44.248	27.0461	1.63602	0.0133849	0.1908
Ciclev10000028m.g	AT1G35660.1		scaffold_5:39404242-39410935	5.41196	6.94269	0.779519	1	1
Ciclev10000029m.g	AT3G14460.1	LRR and NB-ARC domains-containing disease resistance protein	scaffold_5:20095172-20099940	5.48783	6.1661	0.89	1	1
Ciclev10000030m.g	AT1G58060.1	RNA helicase family protein	scaffold_5:6404462-6435349	15.8156	13.2816	1.19079	0.583924	1
Ciclev10000033m.g	AT1G35530.2	DEAD/DEAH box RNA helicase family protein	scaffold_5:39311466-39320010	0.91366	0.906521	1.00788	1	1
Ciclev10000034m.g	AT1G76810.1	eukaryotic translation initiation factor 2 (eIF-2) family protein	scaffold_5:38595157-38602400	40.7722	32.6732	1.24788	0.162051	1
Ciclev10000035m.g	AT1G50240.2	Protein kinase family protein with ARM repeat domain	scaffold_5:35361068-35371122	0.197547	0.203297	0.971716	1	1
Ciclev10000037m.g	AT5G60930.1	P-loop containing nucleoside triphosphate hydrolases superfamily protein	scaffold_5:35583221-35591613	0.136479	0.387537	0.35217	1	1
Ciclev10000038m.g	AT1G75310.1	auxin-like 1 protein	scaffold_5:41184179-41190033	25.6185	29.9322	0.855884	1	1
Ciclev10000039m.g	AT4G38350.1	Patched family protein	scaffold_5:42718714-42734337	25.1314	39.988	0.628474	0.266955	1
Ciclev10000043m.g	AT5G42400.1	SET domain protein 25	scaffold_5:43222581-43234732	10.953	7.90548	1.38549	0.365507	1
Ciclev10000045m.g	AT1G20720.1	RAD3-like DNA-binding helicase protein	scaffold_5:42809559-42821401	1.92527	2.06132	0.933999	1	1
Ciclev10000047m.g	AT2G02480.1	AAA-type ATPase family protein	scaffold_5:414255-420341	1.56267	0.754213	2.07192	0.60305	1
Ciclev10000050m.g	AT5G42390.1	Insulinase (Peptidase family M16) family protein	scaffold_5:43198202-43209378	89.051	86.9852	1.02375	0.292659	1
Ciclev10000052m.g	AT5G07740.1	actin binding	scaffold_5:27564184-27578397	7.50081	3.62993	2.06638	0.247291	1
Ciclev10000054m.g	AT1G27940.1	P-glycoprotein 13	scaffold_5:42101279-42106547	1.70936	1.8554	0.921289	1	1
Ciclev10000055m.g	AT4G27190.1	NB-ARC domain-containing disease resistance protein	scaffold_5:32339882-32346597	2.77331	2.07474	1.3367	1	1
Ciclev10000059m.g	AT4G24610.1		scaffold_5:35744243-35755651	4.77342	4.36222	1.09426	1	1
Ciclev10000060m.g	AT4G25960.1	P-glycoprotein 2	scaffold_5:27441741-27448756	10.2333	5.33177	1.91931	0.152632	0.987216
Ciclev10000062m.g	AT1G20970.1		scaffold_5:43093043-43098705	4.60336	10.2147	0.45066	0.316544	1
Ciclev10000063m.g	AT2G02560.2	cullin-associated and neddylation dissociated	scaffold_5:858466-871605	31.9658	23.9124	1.33679	0.140878	0.933714
Ciclev10000065m.g	AT3G05380.1	DIRP ;Myb-like DNA-binding domain	scaffold_5:33016989-33027934	12.6647	9.65225	1.3121	0.406509	1
Ciclev10000066m.g	AT4G27190.1	NB-ARC domain-containing disease resistance protein	scaffold_5:5285908-5290456	8.09921	10.8767	0.744639	1	1
Ciclev10000067m.g	AT1G77620.1	P-loop containing nucleoside triphosphate hydrolases superfamily protein	scaffold_5:37280602-37288224	7.46846	7.39696	1.00967	0.808221	1
Ciclev10000069m.g	AT1G22930.1	T-complex protein 11	scaffold_5:8532279-8539677	23.263	41.1776	0.564943	0.108196	0.802433
Ciclev10000070m.g	AT5G27650.1	Tudor/PWWP/MBT superfamily protein	scaffold_5:33241335-33246175	12.4329	12.0976	1.02772	0.844978	1
Ciclev10000072m.g	AT3G05040.1	ARM repeat superfamily protein	scaffold_5:30967584-30977437	7.53247	4.6893	1.60631	0.405966	1
Ciclev10000073m.g	AT3G14470.1	NB-ARC domain-containing disease resistance protein	scaffold_5:35118180-35121835	1.74772	1.71246	1.02059	1	1
Ciclev10000077m.g	AT1G10930.1	DNA helicase (RECQl4A)	scaffold_5:8520323-8529662	0.305202	0.358131	0.852208	1	1
Ciclev10000078m.g	AT5G45140.1	nuclear RNA polymerase C2	scaffold_5:20865262-20886290	16.4204	14.1805	1.15796	0.485209	1
Ciclev10000079m.g	AT4G24560.1	ubiquitin-specific protease 16	scaffold_5:35687309-35694527	13.1699	20.5772	0.640024	0.499067	1
Ciclev10000080m.g	AT1G21730.1	P-loop containing nucleoside triphosphate hydrolases superfamily protein	scaffold_5:37544496-37560859	3.47617	3.7285	0.932324	1	1
Ciclev10000081m.g	AT5G27240.1	DNAJ heat shock N-terminal domain-containing protein	scaffold_5:31411457-31415480	4.93364	4.25858	1.15852	1	1
Ciclev10000082m.g	AT4G32640.1	Sec23/Sec24 protein transport family protein	scaffold_5:30615375-30629437	26.4302	25.6335	1.03108	0.583725	1
Ciclev10000083m.g	AT1G75640.1	Leucine-rich receptor-like protein kinase family protein	scaffold_5:41604995-41608538	0.45098	0.12947	3.48328	1	1
Ciclev10000084m.g	AT5G27030.1	TOPLESS-related 3	scaffold_5:33791193-33800828	39.8302	31.748	1.25457	0.156603	0.988401
Ciclev10000085m.g	AT5G64070.1	phosphatidylinositol 4-OH kinase beta1	scaffold_5:18178125-18191583	15.9695	16.1835	0.986777	0.863404	1
Ciclev10000086m.g	AT5G63960.1	DNA binding;nucleotide binding;nucleic acid binding;DNA-directed DNA polymerases;DNA-directed DNA polymerases	scaffold_5:16510957-16526623	5.64187	4.53535	1.24398	0.764943	1
Ciclev10000087m.g	AT1G75660.1	5\'-3\' exoribonuclease 3	scaffold_5:41811141-41820743	64.5756	48.8997	1.32057	0.0310171	0.355425
Ciclev10000088m.g	AT1G09620.1	ATP binding;leucine-tRNA ligases;aminoacyl-tRNA ligases;nucleotide binding;ATP binding;aminoacyl-tRNA ligases	scaffold_5:2487210-2492388	27.0823	22.3954	1.20928	0.264206	1
Ciclev10000089m.g	AT3G05630.1	phospholipase D P2	scaffold_5:33758214-33765582	1.12394	0.856454	1.31232	0.60305	1
Ciclev10000092m.g	AT5G42140.1	Regulator of chromosome condensation (RCC1) family with FYVE zinc finger domain	scaffold_5:38499023-38504883	23.5457	30.5217	0.771441	0.686315	1
Ciclev10000093m.g	AT1G77680.1	Ribonuclease II/R family protein	scaffold_5:37146864-37152552	8.83054	7.46886	1.18231	0.635779	1
Ciclev10000095m.g	AT1G20760.1	Calcium-binding EF hand family protein	scaffold_5:42827733-42834567	29.2582	24.6399	1.18743	0.280781	1
Ciclev10000096m.g	AT5G63950.1	chromatin remodeling 24	scaffold_5:16383906-16396185	9.5434	9.23943	1.0329	0.825402	1
Ciclev10000097m.g	AT4G24170.1	ATP binding microtubule motor family protein	scaffold_5:41591990-41597171	2.83165	3.12467	0.906224	1	1
Ciclev10000098m.g	AT3G03050.1	cellulose synthase-like D3	scaffold_5:26641956-26646157	7.4846	9.05057	0.826976	1	1
Ciclev10000100m.g	AT1G20980.1	squamosa promoter binding protein-like 14	scaffold_5:43108997-43114214	77.7977	101.619	0.765582	0.370307	1
Ciclev10000102m.g	AT1G19835.1	Plant protein of unknown function (DUF869)	scaffold_5:41765024-41772007	4.61005	7.92521	0.581694	0.590842	1
Ciclev10000103m.g	AT2G21770.1	cellulose synthase A9	scaffold_5:38805240-38812427	4.30681	3.05701	1.40883	0.742562	1
Ciclev10000105m.g	AT1G27595.1		scaffold_5:35093131-35106001	8.72703	6.45851	1.35125	0.465725	1
Ciclev10000108m.g	AT1G76850.1	exocyst complex component sec5	scaffold_5:38626628-38638741	24.2368	26.6975	0.90783	0.89014	1
Ciclev10000109m.g	AT5G49810.1	methionine S-methyltransferase	scaffold_5:592297-601081	16.4098	20.0014	0.820433	0.871487	1
Ciclev10000110m.g	AT5G48940.1	Leucine-rich repeat transmembrane protein kinase family protein	scaffold_5:38426629-38430121	1.43588	0.290885	4.93625	0.60305	1
Ciclev10000111m.g	AT4G27190.1	NB-ARC domain-containing disease resistance protein	scaffold_5:5274795-5282044	24.3616	25.2659	0.964209	0.780476	1
Ciclev10000115m.g	AT5G27220.1	Frigida-like protein	scaffold_5:31319624-31325108	1.73939	1.02576	1.69571	1	1
Ciclev10000116m.g	AT1G21650.2	Preprotein translocase SecA family protein	scaffold_5:37735872-37749205	18.6719	16.7576	1.11423	0.507478	1
Ciclev10000117m.g	AT5G64740.1	cellulose synthase 6	scaffold_5:43243673-43249114	0.786463	0.522303	1.50576	1	1
Ciclev10000118m.g	AT5G42870.1	phosphatidic acid phosphohydrolase 2	scaffold_5:40253859-40262178	10.7516	30.0982	0.357217	0.00802257	0.126832
Ciclev10000119m.g	AT1G34110.1	Leucine-rich receptor-like protein kinase family protein	scaffold_5:39136792-39140384	0.0750893	0.0608772	1.23346	1	1
Ciclev10000120m.g	AT5G26860.1	lon protease 1	scaffold_5:34008553-34016913	12.4161	10.7241	1.15778	0.542021	1
Ciclev10000121m.g	AT4G08350.1	global transcription factor group A2	scaffold_5:38288046-38296128	40.9192	43.7868	0.93451	0.828447	1
Ciclev10000122m.g	AT4G24200.1	Transcription elongation factor (TFIIS) family protein	scaffold_5:42042701-42048167	22.0587	29.1579	0.756526	0.680494	1
Ciclev10000123m.g	AT4G27190.1	NB-ARC domain-containing disease resistance protein	scaffold_5:23452527-23456180	0.0677944	0.163505	0.414632	1	1
Ciclev10000125m.g	AT5G47820.1	P-loop containing nucleoside triphosphate hydrolases superfamily protein	scaffold_5:39942397-39952725	0.706719	0.7775	0.908963	1	1
Ciclev10000126m.g	AT3G63380.1	ATPase E1-E2 type family protein / haloacid dehalogenase-like hydrolase family protein	scaffold_5:29584087-29587183	0.0315451	0.101178	0.311778	1	1
Ciclev10000128m.g	AT3G12280.2	retinoblastoma-related 1	scaffold_5:21203993-21212595	12.3046	13.6698	0.90013	1	1
Ciclev10000129m.g	AT3G63380.1	ATPase E1-E2 type family protein / haloacid dehalogenase-like hydrolase family protein	scaffold_5:26007724-26010936	0.119833	0.0957867	1.25104	1	1
Ciclev10000130m.g	AT1G35220.1		scaffold_5:36049676-36056860	5.69587	4.42505	1.28719	0.764943	1
Ciclev10000131m.g	AT5G27000.1	kinesin 4	scaffold_5:33831343-33837397	0.0304438	0.0245578	1.23968	1	1
Ciclev10000133m.g	AT1G06900.1	Insulinase (Peptidase family M16) family protein	scaffold_5:14105880-14117664	20.1056	19.5791	1.02689	0.639843	1
Ciclev10000134m.g	AT1G27770.1	autoinhibited Ca2+-ATPase 1	scaffold_5:34607063-34612877	71.2671	113.651	0.62707	0.027403	0.328836
Ciclev10000136m.g	AT4G27190.1	NB-ARC domain-containing disease resistance protein	scaffold_5:23271912-23277658	0.0684456	0.165057	0.414679	1	1
Ciclev10000138m.g	AT1G54710.1	homolog of yeast autophagy 18 (ATG18) H	scaffold_5:32250437-32256614	6.91593	5.28457	1.3087	0.782591	1
Ciclev10000139m.g	AT1G80260.1	Spc97 / Spc98 family of spindle pole body (SBP) component	scaffold_5:40472464-40478799	7.04459	6.55718	1.07433	0.796981	1
Ciclev10000140m.g	AT4G11800.1	Calcineurin-like metallo-phosphoesterase superfamily protein	scaffold_5:40363272-40371671	62.3605	160.03	0.38968	1.27e-08	7.68e-07
Ciclev10000141m.g	AT1G45616.1	receptor like protein 6	scaffold_5:20067383-20070734	26.1361	25.1706	1.03836	0.583725	1
Ciclev10000142m.g	AT1G10130.1	endoplasmic reticulum-type calcium-transporting ATPase 3	scaffold_5:34716373-34732757	36.4951	34.9219	1.04505	0.479445	1
Ciclev10000144m.g	AT5G26850.1	Uncharacterized protein	scaffold_5:34063268-34070535	12.1472	10.319	1.17717	0.542021	1
Ciclev10000146m.g	AT1G21640.1	NAD kinase 2	scaffold_5:37770211-37775957	53.3815	32.7836	1.6283	0.00503197	0.0865429
Ciclev10000147m.g	AT2G22610.2	Di-glucose binding protein with Kinesin motor domain	scaffold_5:35395148-35401096	0.715629	0.753353	0.949925	1	1
Ciclev10000148m.g	AT5G65700.1	Leucine-rich receptor-like protein kinase family protein	scaffold_5:5126652-5131092	2.16845	1.50215	1.44356	0.670509	1
Ciclev10000149m.g	AT5G06120.4	ARM repeat superfamily protein	scaffold_5:19692511-19713573	11.1233	10.9141	1.01917	0.678615	1
Ciclev10000150m.g	AT1G09010.1	glycoside hydrolase family 2 protein	scaffold_5:32939570-32945214	7.51546	6.36909	1.17999	0.796981	1
Ciclev10000151m.g	AT4G27190.1	NB-ARC domain-containing disease resistance protein	scaffold_5:23309249-23312903	1.35448	0.859547	1.57581	0.60305	1
Ciclev10000152m.g	AT3G23640.1	heteroglycan glucosidase 1	scaffold_5:27492965-27507205	23.1305	19.8486	1.16535	0.365139	1
Ciclev10000154m.g	AT4G11420.1	eukaryotic translation initiation factor 3A	scaffold_5:33811595-33817196	37.3211	42.8455	0.871062	1	1
Ciclev10000155m.g	AT1G09970.1	Leucine-rich receptor-like protein kinase family protein	scaffold_5:35039707-35043069	19.6519	24.8996	0.789246	0.767479	1
Ciclev10000156m.g	AT1G75820.1	Leucine-rich receptor-like protein kinase family protein	scaffold_5:42071084-42074749	4.46979	4.54643	0.983143	1	1
Ciclev10000159m.g	AT1G77320.1	transcription coactivators	scaffold_5:37782182-37790454	1.29385	2.30264	0.561899	1	1
Ciclev10000161m.g	AT1G78280.1	transferases, transferring glycosyl groups	scaffold_5:36181144-36190607	44.326	72.06	0.615126	0.0647709	0.592658
Ciclev10000162m.g	AT1G45616.1	receptor like protein 6	scaffold_5:20003841-20007042	50.4512	15.319	3.29337	1.7e-06	7.28e-05
Ciclev10000167m.g	AT1G08720.1	Protein kinase superfamily protein	scaffold_5:30744685-30751821	22.2258	22.4882	0.988332	0.768021	1
Ciclev10000168m.g	AT1G54490.1	exoribonuclease 4	scaffold_5:30641621-30651133	19.3014	22.9133	0.842367	1	1
Ciclev10000171m.g	AT1G58370.1	glycosyl hydrolase family 10 protein / carbohydrate-binding domain-containing protein	scaffold_5:34929761-34934474	2.55639	2.75432	0.928138	1	1
Ciclev10000172m.g	AT5G42220.1	Ubiquitin-like superfamily protein	scaffold_5:42460203-42468795	33.7434	35.264	0.95688	0.811304	1
Ciclev10000174m.g	AT1G06840.1	Leucine-rich repeat protein kinase family protein	scaffold_5:15086105-15095333	33.5712	27.7313	1.21059	0.251914	1
Ciclev10000175m.g	AT4G34310.1	alpha/beta-Hydrolases superfamily protein	scaffold_5:40348116-40353953	7.76586	5.03241	1.54317	0.594063	1
Ciclev10000176m.g	AT5G49760.1	Leucine-rich repeat protein kinase family protein	scaffold_5:272938-279075	12.5416	10.538	1.19013	0.542021	1
Ciclev10000177m.g	AT5G43130.1	TBP-associated factor 4	scaffold_5:34507107-34513613	13.8336	10.1596	1.36163	0.424739	1
Ciclev10000178m.g	AT1G09060.3	Zinc finger, RING-type;Transcription factor jumonji/aspartyl beta-hydroxylase	scaffold_5:33225099-33232451	13.3809	10.7863	1.24055	0.424739	1
Ciclev10000179m.g	AT4G27220.1	NB-ARC domain-containing disease resistance protein	scaffold_5:31632151-31635063	0.373357	0.352798	1.05827	1	1
Ciclev10000180m.g	AT1G21740.1	Protein of unknown function (DUF630 and DUF632)	scaffold_5:37502223-37507873	4.27132	2.89665	1.47457	0.486694	1
Ciclev10000182m.g	AT1G34420.1	leucine-rich repeat transmembrane protein kinase family protein	scaffold_5:39477781-39484776	87.6303	37.9289	2.31038	2.33e-07	1.16e-05
Ciclev10000183m.g	AT1G19850.1	Transcriptional factor B3 family protein / auxin-responsive factor AUX/IAA-related	scaffold_5:41722612-41729501	6.92861	4.30896	1.60795	0.565572	1
Ciclev10000185m.g	AT1G43850.1	SEUSS transcriptional co-regulator	scaffold_5:38229418-38236940	28.8157	18.2755	1.57674	0.0815601	0.681013
Ciclev10000188m.g	AT1G20640.1	Plant regulator RWP-RK family protein	scaffold_5:42710680-42715502	3.27121	2.42236	1.35042	0.712829	1
Ciclev10000190m.g	AT5G24360.2	inositol requiring 1-1	scaffold_5:42870966-42874870	20.1194	27.0797	0.74297	0.66811	1
Ciclev10000191m.g	AT1G76810.1	eukaryotic translation initiation factor 2 (eIF-2) family protein	scaffold_5:34269271-34273962	0.1189	0.285641	0.416257	1	1
Ciclev10000192m.g	AT4G24480.1	Protein kinase superfamily protein	scaffold_5:35502381-35510013	1.63144	1.58998	1.02608	1	1
Ciclev10000193m.g	AT3G11080.1	receptor like protein 35	scaffold_5:1411431-1414337	11.1697	2.807	3.97923	0.0167161	0.224087
Ciclev10000195m.g	AT1G42540.1	glutamate receptor 3.3	scaffold_5:42861981-42867071	7.16463	5.66058	1.26571	0.594063	1
Ciclev10000198m.g	AT4G27220.1	NB-ARC domain-containing disease resistance protein	scaffold_5:23637161-23640316	1.99887	2.13643	0.935612	1	1
Ciclev10000199m.g	AT5G49900.1	Beta-glucosidase, GBA2 type family protein	scaffold_5:2303351-2309639	5.39073	3.05273	1.76587	0.530721	1
Ciclev10000200m.g	AT5G63840.1	Glycosyl hydrolases family 31 protein	scaffold_5:15888736-15896759	19.5591	13.7753	1.41987	0.172786	1
Ciclev10000201m.g	AT1G09730.2	Cysteine proteinases superfamily protein	scaffold_5:35610473-35618268	21.3183	17.6075	1.21075	0.343136	1
Ciclev10000202m.g	AT1G54920.3		scaffold_5:32773920-32779114	20.082	25.6834	0.781906	0.884002	1
Ciclev10000203m.g	AT3G05470.1	Actin-binding FH2 (formin homology 2) family protein	scaffold_5:33276866-33279877	0.038826	0.127301	0.304994	1	1
Ciclev10000204m.g	AT1G22620.1	Phosphoinositide phosphatase family protein	scaffold_5:39682995-39692504	17.6104	22.3786	0.78693	0.755893	1
Ciclev10000205m.g	AT1G22310.2	methyl-CPG-binding domain 8	scaffold_5:36338620-36344138	8.24379	8.84606	0.931917	0.817333	1
Ciclev10000206m.g	AT5G36930.2	Disease resistance protein (TIR-NBS-LRR class) family	scaffold_5:19378553-19383953	10.5871	8.82972	1.19903	0.507541	1
Ciclev10000207m.g	AT5G26910.1		scaffold_5:33908954-33913762	2.96364	1.72879	1.71429	0.670509	1
Ciclev10000208m.g	AT5G49960.1		scaffold_5:5978131-5984111	5.59966	2.45828	2.27788	0.320917	1
Ciclev10000209m.g	AT1G06950.1	translocon at the inner envelope membrane of chloroplasts 110	scaffold_5:12908400-12916815	51.415	39.7107	1.29474	0.0752517	0.648822
Ciclev10000213m.g	AT3G18310.1		scaffold_5:6024578-6027417	3.58007	3.87394	0.924142	1	1
Ciclev10000215m.g	AT2G26570.1	Plant protein of unknown function (DUF827)	scaffold_5:40200372-40208310	5.70189	6.24236	0.913419	1	1
Ciclev10000216m.g	AT1G59610.1	dynamin-like 3	scaffold_5:2045916-2057989	1.59304	1.55269	1.02599	1	1
Ciclev10000217m.g	AT2G16250.1	Leucine-rich repeat protein kinase family protein	scaffold_5:41058941-41064267	74.924	105.866	0.707725	0.15699	0.990208
Ciclev10000218m.g	AT2G24960.2		scaffold_5:32690028-32694830	12.7592	10.9181	1.16863	0.542021	1
Ciclev10000220m.g	AT1G77760.1	nitrate reductase 1	scaffold_5:36963546-36968045	26.5677	99.426	0.267211	3.33e-09	2.12e-07
Ciclev10000221m.g	AT4G27190.1	NB-ARC domain-containing disease resistance protein	scaffold_5:23561670-23564601	1.48968	1.64819	0.903828	1	1
Ciclev10000223m.g	AT4G27190.1	NB-ARC domain-containing disease resistance protein	scaffold_5:15929730-15932422	0.0747835	1e-05	7478.35	1	1
Ciclev10000225m.g	AT2G30470.1	high-level expression of sugar-inducible gene 2	scaffold_5:14343906-14350359	5.41932	3.93713	1.37646	0.530721	1
Ciclev10000226m.g	AT4G08550.1	electron carriers;protein disulfide oxidoreductases	scaffold_5:36789179-36794175	13.8701	20.9543	0.661921	0.499067	1
Ciclev10000227m.g	AT1G09090.2	respiratory burst oxidase homolog B	scaffold_5:33286115-33291455	0.943512	6.29989	0.149766	0.0746216	0.647382
Ciclev10000228m.g	AT4G27190.1	NB-ARC domain-containing disease resistance protein	scaffold_5:22922231-22925922	5.71427	5.71673	0.99957	1	1
Ciclev10000229m.g	AT1G19720.1	Pentatricopeptide repeat (PPR-like) superfamily protein	scaffold_5:41420210-41424077	9.97619	10.5187	0.948424	1	1
Ciclev10000230m.g	AT1G47550.1	exocyst complex component sec3A	scaffold_5:40639760-40650497	24.1885	25.3676	0.953519	0.780476	1
Ciclev10000233m.g	AT5G16780.1	SART-1 family	scaffold_5:5995714-6003233	16.7383	11.5549	1.44859	0.26412	1
Ciclev10000234m.g	AT5G27680.1	RECQ helicase SIM	scaffold_5:33258591-33265332	2.71541	2.40943	1.12699	1	1
Ciclev10000235m.g	AT5G49730.1	ferric reduction oxidase 6	scaffold_5:120510-126181	10.0438	5.62172	1.78661	0.152632	0.987216
Ciclev10000236m.g	AT1G55020.1	lipoxygenase 1	scaffold_5:32990159-32995860	25.4833	18.2072	1.39963	0.178308	1
Ciclev10000237m.g	AT1G22260.1	Myosin heavy chain-related protein	scaffold_5:36415987-36422893	3.351	5.30537	0.631624	0.758707	1
Ciclev10000238m.g	AT4G24270.2	EMBRYO DEFECTIVE 140	scaffold_5:803357-811195	33.5716	41.4335	0.810253	0.731644	1
Ciclev10000240m.g	AT1G42550.1	plastid movement impaired1	scaffold_5:42934683-42937662	5.85118	2.24149	2.6104	0.320917	1
Ciclev10000241m.g	AT3G54350.1	Forkhead-associated (FHA) domain-containing protein	scaffold_5:41536513-41542715	2.94672	1.57486	1.8711	0.670509	1
Ciclev10000243m.g	AT1G31930.1	extra-large GTP-binding protein 3	scaffold_5:26183763-26192455	50.314	46.6427	1.07871	0.31307	1
Ciclev10000247m.g	AT4G17770.1	trehalose phosphatase/synthase 5	scaffold_5:27463515-27469472	8.09152	4.56733	1.77161	0.283995	1
Ciclev10000250m.g	AT5G42620.2	metalloendopeptidases;zinc ion binding	scaffold_5:40754816-40761430	13.4348	10.0874	1.33184	0.424739	1
Ciclev10000251m.g	AT1G69770.1	chromomethylase 3	scaffold_5:581145-587422	0.114945	0.184188	0.624063	1	1
Ciclev10000254m.g	AT5G45400.1	Replication factor-A protein 1-related	scaffold_5:24381726-24384719	2.40653	3.86213	0.62311	1	1
Ciclev10000255m.g	AT2G27110.1	FAR1-related sequence 3	scaffold_5:24360294-24367588	7.09489	5.25478	1.35018	0.594063	1
Ciclev10000256m.g	AT2G36390.1	starch branching enzyme 2.1	scaffold_5:42653993-42661287	42.4007	34.5839	1.22602	0.172992	1
Ciclev10000257m.g	AT1G77720.1	putative protein kinase 1	scaffold_5:37071269-37075490	0.196456	0.162484	1.20908	1	1
Ciclev10000260m.g	AT4G36360.1	beta-galactosidase 3	scaffold_5:41432161-41439014	4.49681	8.19347	0.548829	0.436805	1
Ciclev10000262m.g	AT5G46910.1	Transcription factor jumonji (jmj) family protein / zinc finger (C5HC2 type) family protein	scaffold_5:27088043-27093198	66.4836	115.2	0.577115	0.00599804	0.100337
Ciclev10000263m.g	AT1G55040.1	zinc finger (Ran-binding) family protein	scaffold_5:33010949-33015057	4.99369	4.51177	1.10681	1	1
Ciclev10000264m.g	AT1G34355.1	forkhead-associated (FHA) domain-containing protein	scaffold_5:39500186-39503920	0.341415	0.386412	0.883552	1	1
Ciclev10000267m.g	AT5G64580.1	AAA-type ATPase family protein	scaffold_5:18229218-18239197	10.135	9.42216	1.07566	0.665816	1
Ciclev10000268m.g	AT1G56500.1	haloacid dehalogenase-like hydrolase family protein	scaffold_5:34147315-34157133	12.9627	11.6803	1.10979	0.690234	1
Ciclev10000269m.g	AT4G35790.2	phospholipase D delta	scaffold_5:42322096-42327438	0.0398654	0.0319241	1.24876	1	1
Ciclev10000271m.g	AT1G10270.1	glutamine-rich protein 23	scaffold_5:2073605-2076567	10.4137	9.29624	1.12021	0.665816	1
Ciclev10000273m.g	AT4G22200.1	potassium transport 2/3	scaffold_5:8573280-8583459	6.60848	4.86343	1.35881	0.565572	1
Ciclev10000274m.g	AT4G19440.1	Tetratricopeptide repeat (TPR)-like superfamily protein	scaffold_5:28852991-28857436	3.36268	2.01145	1.67177	0.712829	1
Ciclev10000275m.g	AT4G27190.1	NB-ARC domain-containing disease resistance protein	scaffold_5:30209767-30213485	5.76332	3.29626	1.74844	0.530721	1
Ciclev10000277m.g	AT4G27190.1	NB-ARC domain-containing disease resistance protein	scaffold_5:31469286-31473337	5.4711	7.30528	0.748924	0.796225	1
Ciclev10000281m.g	AT4G33300.1	ADR1-like 1	scaffold_5:40494581-40498159	122.839	131.233	0.936037	0.661115	1
Ciclev10000286m.g	AT3G05670.1	RING/U-box protein	scaffold_5:33846261-33853353	18.0616	27.8773	0.647896	0.385713	1
Ciclev10000287m.g	AT4G08850.1	Leucine-rich repeat receptor-like protein kinase family protein	scaffold_5:36445868-36449020	3.29444	1.57427	2.09268	0.428556	1
Ciclev10000289m.g	AT4G15570.1	P-loop containing nucleoside triphosphate hydrolases superfamily protein	scaffold_5:19183059-19192077	8.81515	6.75833	1.30434	0.465725	1
Ciclev10000290m.g	AT5G42920.2	THO complex, subunit 5	scaffold_5:40128390-40138178	25.2996	21.4847	1.17756	0.315861	1
Ciclev10000294m.g	AT1G21651.1	zinc ion binding	scaffold_5:37726071-37731862	12.3279	9.52848	1.2938	0.406509	1
Ciclev10000295m.g	AT1G19870.1	IQ-domain 32	scaffold_5:41694481-41700100	18.6882	11.129	1.67923	0.148781	0.96968
Ciclev10000296m.g	AT4G24190.1	Chaperone protein htpG family protein	scaffold_5:42007123-42011753	150.623	109.344	1.37751	0.000394125	0.00999198
Ciclev10000297m.g	AT1G05580.1	cation/H+ exchanger 23	scaffold_5:32733964-32736806	1.12418	2.96348	0.379345	1	1
Ciclev10000298m.g	AT1G76140.1	Prolyl oligopeptidase family protein	scaffold_5:42418836-42424800	153	178.352	0.857854	0.783622	1
Ciclev10000301m.g	AT4G07410.1	Transducin family protein / WD-40 repeat family protein	scaffold_5:34707545-34714949	20.4061	18.6623	1.09344	0.527775	1
Ciclev10000302m.g	AT1G65470.1	chromatin assembly factor-1 (FASCIATA1) (FAS1)	scaffold_5:34276104-34281941	1.03724	1.31605	0.788146	1	1
Ciclev10000306m.g	AT1G76390.1	ARM repeat superfamily protein	scaffold_5:42841158-42844776	44.9272	68.8162	0.652858	0.132896	0.899391
Ciclev10000307m.g	AT1G11290.1	Pentatricopeptide repeat (PPR) superfamily protein	scaffold_5:20081413-20086750	5.66167	4.84842	1.16774	0.764943	1
Ciclev10000309m.g	AT1G45231.2	S-adenosyl-L-methionine-dependent methyltransferases superfamily protein	scaffold_5:40128390-40138178	5.03413	3.14148	1.60247	0.530721	1
Ciclev10000310m.g	AT1G09980.1	Putative serine esterase family protein	scaffold_5:19136292-19146196	15.8066	14.5893	1.08344	0.595875	1
Ciclev10000311m.g	AT2G34300.1	S-adenosyl-L-methionine-dependent methyltransferases superfamily protein	scaffold_5:38036284-38041507	5.03892	7.18465	0.701345	0.796225	1
Ciclev10000312m.g	AT1G32090.1	early-responsive to dehydration stress protein (ERD4)	scaffold_5:25969556-25975972	0.464907	0.333079	1.39579	1	1
Ciclev10000313m.g	AT4G08180.1	OSBP(oxysterol binding protein)-related protein 1C	scaffold_5:37043416-37051080	71.2271	105.199	0.67707	0.0982161	0.760699
Ciclev10000315m.g	AT4G27190.1	NB-ARC domain-containing disease resistance protein	scaffold_5:30111178-30113590	6.85397	5.69304	1.20392	0.782591	1
Ciclev10000316m.g	AT2G47430.1	Signal transduction histidine kinase	scaffold_5:33970381-33974347	20.1775	21.4164	0.942152	0.878866	1
Ciclev10000322m.g	AT1G25360.1	Pentatricopeptide repeat (PPR) superfamily protein	scaffold_5:41588808-41591747	1.93347	2.47058	0.782598	1	1
Ciclev10000323m.g	AT4G27190.1	NB-ARC domain-containing disease resistance protein	scaffold_5:30043537-30045934	5.9897	4.4186	1.35557	0.764943	1
Ciclev10000324m.g	AT1G05150.1	Calcium-binding tetratricopeptide family protein	scaffold_5:41582117-41585127	19.0371	27.4028	0.694714	0.563405	1
Ciclev10000325m.g	AT1G62830.1	LSD1-like 1	scaffold_5:42492097-42494989	4.63775	7.27906	0.637136	0.590842	1
Ciclev10000326m.g	AT3G48090.1	alpha/beta-Hydrolases superfamily protein	scaffold_5:1089866-1094215	2.18412	1.99656	1.09394	0.670509	1
Ciclev10000327m.g	AT4G27190.1	NB-ARC domain-containing disease resistance protein	scaffold_5:29917519-29920233	2.48369	1.75987	1.41129	0.670509	1
Ciclev10000328m.g	AT5G64030.1	S-adenosyl-L-methionine-dependent methyltransferases superfamily protein	scaffold_5:16635631-16640424	36.5835	58.3307	0.627174	0.12458	0.873309
Ciclev10000329m.g	AT4G27220.1	NB-ARC domain-containing disease resistance protein	scaffold_5:30096449-30098995	2.44498	3.02366	0.808616	1	1
Ciclev10000330m.g	AT1G42440.1		scaffold_5:42618465-42624771	33.9297	32.2063	1.05351	0.542469	1
Ciclev10000331m.g	AT4G27190.1	NB-ARC domain-containing disease resistance protein	scaffold_5:30006502-30009263	8.22899	6.8775	1.19651	0.465725	1
Ciclev10000333m.g	AT1G10390.1	Nucleoporin autopeptidase	scaffold_5:26136985-26141621	2.18734	1.52043	1.43863	0.670509	1
Ciclev10000334m.g	AT1G21980.1	phosphatidylinositol-4-phosphate 5-kinase 1	scaffold_5:37030668-37035492	5.26811	3.81101	1.38234	0.530721	1
Ciclev10000335m.g	AT1G75850.1	VPS35 homolog B	scaffold_5:42113620-42120391	21.5517	23.217	0.928272	1	1
Ciclev10000336m.g	AT5G49890.1	chloride channel C	scaffold_5:2059128-2063462	13.7572	13.4771	1.02078	0.850339	1
Ciclev10000337m.g	AT1G78160.1	pumilio 7	scaffold_5:36452982-36458601	0.0958396	1e-05	9583.96	1	1
Ciclev10000338m.g	AT4G26090.1	NB-ARC domain-containing disease resistance protein	scaffold_5:24930730-24933418	7.24183	4.36301	1.65982	0.405966	1
Ciclev10000339m.g	AT1G20160.1	Subtilisin-like serine endopeptidase family protein	scaffold_5:42194475-42197926	5.82916	2.07301	2.81193	0.320917	1
Ciclev10000341m.g	AT1G77030.1	hydrolases, acting on acid anhydrides, in phosphorus-containing anhydrides;ATP-dependent helicases;nucleic acid binding;ATP binding;RNA binding;helicases	scaffold_5:38127346-38134197	18.2995	14.8207	1.23473	0.307308	1
Ciclev10000342m.g	AT1G60890.2	Phosphatidylinositol-4-phosphate 5-kinase family protein	scaffold_5:9950355-9958602	7.34667	6.38841	1.15	0.796981	1
Ciclev10000343m.g	AT1G21610.1	wound-responsive family protein	scaffold_5:37790998-37797703	6.31671	8.61257	0.733429	1	1
Ciclev10000344m.g	AT3G01610.1	cell division cycle 48C	scaffold_5:811792-817028	14.8483	13.6777	1.08558	0.710578	1
Ciclev10000345m.g	AT3G47570.1	Leucine-rich repeat protein kinase family protein	scaffold_5:17707311-17710634	1.38403	2.65389	0.52151	1	1
Ciclev10000346m.g	AT1G22610.1	C2 calcium/lipid-binding plant phosphoribosyltransferase family protein	scaffold_5:39774139-39776871	0.222763	0.296879	0.750349	1	1
Ciclev10000347m.g	AT4G09020.1	isoamylase 3	scaffold_5:36036989-36048487	11.3596	9.29591	1.222	0.525565	1
Ciclev10000348m.g	AT5G49570.1	peptide-N-glycanase 1	scaffold_5:29691666-29699867	21.3478	22.237	0.960013	0.881497	1
Ciclev10000349m.g	AT1G20160.1	Subtilisin-like serine endopeptidase family protein	scaffold_5:23717648-23726446	4.01916	3.88088	1.03563	0.742562	1
Ciclev10000351m.g	AT5G35370.1	S-locus lectin protein kinase family protein	scaffold_5:37134498-37138336	2.15538	1.36828	1.57525	0.670509	1
Ciclev10000352m.g	AT1G78060.1	Glycosyl hydrolase family protein	scaffold_5:36588686-36592786	10.4743	16.0299	0.653423	0.454623	1
Ciclev10000353m.g	AT1G05460.1	P-loop containing nucleoside triphosphate hydrolases superfamily protein	scaffold_5:30767754-30771272	4.473	10.695	0.418233	0.316544	1
Ciclev10000354m.g	AT4G30110.1	heavy metal atpase 2	scaffold_5:4479508-4484003	0.0936923	0.113003	0.829113	1	1
Ciclev10000355m.g	AT5G64570.1	beta-D-xylosidase 4	scaffold_5:22304299-22309822	1.3838	4.85796	0.284852	0.459551	1
Ciclev10000358m.g	AT1G77280.1	Protein kinase protein with adenine nucleotide alpha hydrolases-like domain	scaffold_5:37849212-37853413	3.24911	1.29769	2.50376	0.428556	1
Ciclev10000359m.g	AT3G19720.1	P-loop containing nucleoside triphosphate hydrolases superfamily protein	scaffold_5:22227782-22238036	7.78225	6.53485	1.19088	0.796981	1
Ciclev10000360m.g	AT3G47570.1	Leucine-rich repeat protein kinase family protein	scaffold_5:6566512-6569101	20.8385	19.5674	1.06496	0.639843	1
Ciclev10000361m.g	AT1G58350.1	Putative serine esterase family protein	scaffold_5:35014124-35021589	15.6352	18.1929	0.859412	1	1
Ciclev10000363m.g	AT5G67360.1	Subtilase family protein	scaffold_5:34479396-34482201	4.91383	2.08104	2.36124	0.486694	1
Ciclev10000364m.g	AT5G67090.1	Subtilisin-like serine endopeptidase family protein	scaffold_5:40040263-40042949	0.912415	2.02257	0.451117	0.627943	1
Ciclev10000365m.g	AT1G54790.3	GDSL-like Lipase/Acylhydrolase superfamily protein	scaffold_5:31863795-31870938	1.55793	2.24131	0.695098	1	1
Ciclev10000367m.g	AT3G05090.1	Transducin/WD40 repeat-like superfamily protein	scaffold_5:30816504-30825183	30.3368	36.263	0.836577	0.903479	1
Ciclev10000370m.g	AT5G10940.2	transducin family protein / WD-40 repeat family protein	scaffold_5:35817026-35826170	11.8177	13.2226	0.89375	1	1
Ciclev10000372m.g	AT5G42480.1	Chaperone DnaJ-domain superfamily protein	scaffold_5:41597240-41602791	12.7966	10.2434	1.24925	0.542021	1
Ciclev10000375m.g	AT1G75150.1		scaffold_5:40932836-40937518	1.76799	5.03738	0.350974	0.296778	1
Ciclev10000376m.g	AT1G71820.1	SEC6	scaffold_5:39655306-39664615	2.2658	2.99467	0.756611	1	1
Ciclev10000378m.g	AT1G54570.1	Esterase/lipase/thioesterase family protein	scaffold_5:30828997-30836351	22.0406	19.8427	1.11077	0.445577	1
Ciclev10000379m.g	AT2G21790.1	ribonucleotide reductase 1	scaffold_5:38887374-38894064	2.18653	2.019	1.08298	1	1
Ciclev10000382m.g	AT1G75730.1		scaffold_5:41902167-41907204	6.66788	7.50508	0.888449	1	1
Ciclev10000383m.g	AT4G38180.1	FAR1-related sequence 5	scaffold_5:43053903-43057074	6.73903	6.99204	0.963815	1	1
Ciclev10000386m.g	AT3G22690.2		scaffold_5:34226353-34229316	4.68572	4.39253	1.06675	1	1
Ciclev10000387m.g	AT3G04910.1	with no lysine (K) kinase 1	scaffold_5:30567036-30570413	1.89844	2.33466	0.813155	1	1
Ciclev10000389m.g	AT4G36550.1	ARM repeat superfamily protein	scaffold_5:41126217-41131143	54.8722	31.4812	1.74301	0.00249539	0.0490852
Ciclev10000392m.g	AT1G58520.1	lipases;hydrolases, acting on ester bonds	scaffold_5:34866518-34875003	1.88221	1.17392	1.60335	1	1
Ciclev10000393m.g	AT5G63810.1	beta-galactosidase 10	scaffold_5:15822059-15834446	1.74489	1.95516	0.892454	1	1
Ciclev10000394m.g	AT5G27240.1	DNAJ heat shock N-terminal domain-containing protein	scaffold_5:31431360-31433856	3.19105	3.4739	0.918579	1	1
Ciclev10000395m.g	AT1G71820.1	SEC6	scaffold_5:39644419-39654027	20.7284	20.3413	1.01903	0.75784	1
Ciclev10000396m.g	AT5G66850.1	mitogen-activated protein kinase kinase kinase 5	scaffold_5:40479670-40485358	65.2604	83.8316	0.77847	0.513205	1
Ciclev10000397m.g	AT1G07390.3	receptor like protein 1	scaffold_5:28099256-28102069	26.2718	31.7555	0.827315	0.896859	1
Ciclev10000400m.g	AT4G35300.1	tonoplast monosaccharide transporter2	scaffold_5:42918370-42923480	13.6861	7.95729	1.71994	0.136262	0.915521
Ciclev10000404m.g	AT3G23640.1	heteroglycan glucosidase 1	scaffold_5:27526156-27539324	2.69735	2.53519	1.06396	1	1
Ciclev10000405m.g	AT1G21700.1	SWITCH/sucrose nonfermenting 3C	scaffold_5:37626184-37632397	25.8364	26.2823	0.983034	0.784166	1
Ciclev10000407m.g	AT1G75100.1	J-domain protein required for chloroplast accumulation response 1	scaffold_5:40863026-40868561	34.2346	25.4855	1.3433	0.123047	0.864423
Ciclev10000408m.g	AT5G63700.1	zinc ion binding;DNA binding	scaffold_5:2209340-2219438	8.25233	9.26331	0.890862	1	1
Ciclev10000409m.g	AT4G16630.1	DEA(D/H)-box RNA helicase family protein	scaffold_5:42030907-42037427	29.1842	26.3587	1.10719	0.426677	1
Ciclev10000411m.g	AT5G67090.1	Subtilisin-like serine endopeptidase family protein	scaffold_5:40046649-40048839	0.0498235	1e-05	4982.35	1	1
Ciclev10000412m.g	AT5G12080.1	mechanosensitive channel of small conductance-like 10	scaffold_5:24430820-24436636	2.39355	2.31871	1.03228	1	1
Ciclev10000415m.g	AT3G05610.1	Plant invertase/pectin methylesterase inhibitor superfamily	scaffold_5:33642730-33648714	29.7803	39.6845	0.750426	0.550171	1
Ciclev10000416m.g	AT2G40360.1	Transducin/WD40 repeat-like superfamily protein	scaffold_5:6447014-6453641	54.3283	53.6406	1.01282	0.501894	1
Ciclev10000418m.g	AT5G08720.1		scaffold_5:7288320-7296238	2.24451	1.2251	1.8321	0.670509	1
Ciclev10000419m.g	AT5G49880.1	mitotic checkpoint family protein	scaffold_5:936144-943658	16.4396	17.9954	0.913545	0.86685	1
Ciclev10000420m.g	AT5G63800.1	Glycosyl hydrolase family 35 protein	scaffold_5:15801848-15810954	0.145933	0.314568	0.463916	1	1
Ciclev10000421m.g	AT1G55200.1	Protein kinase protein with adenine nucleotide alpha hydrolases-like domain	scaffold_5:40589993-40595575	0.954863	1.11052	0.859834	1	1
Ciclev10000422m.g	AT5G42270.1	FtsH extracellular protease family	scaffold_5:42541636-42545268	154.802	117.653	1.31575	0.00126548	0.0274894
Ciclev10000424m.g	AT4G09630.1	Protein of unknown function (DUF616)	scaffold_5:39451877-39457800	4.37042	5.08952	0.85871	1	1
Ciclev10000425m.g	AT1G21680.1	DPP6 N-terminal domain-like protein	scaffold_5:37669429-37671959	31.1618	6.17106	5.04967	7.68e-06	0.000285247
Ciclev10000426m.g	AT1G27460.1	no pollen germination related 1	scaffold_5:34654084-34657430	2.07239	0.916954	2.26008	0.346714	1
Ciclev10000427m.g	AT5G26710.1	Glutamyl/glutaminyl-tRNA synthetase, class Ic	scaffold_5:2472804-2477375	34.9912	53.2071	0.657642	0.167864	1
Ciclev10000428m.g	AT1G77270.1		scaffold_5:37871001-37874887	3.70688	2.21833	1.67102	0.712829	1
Ciclev10000430m.g	AT1G60560.1	SWIM zinc finger family protein	scaffold_5:17812396-17816822	20.4586	22.3471	0.915492	1	1
Ciclev10000431m.g	AT3G01680.1		scaffold_5:20550262-20553313	1.59225	1.52392	1.04484	1	1
Ciclev10000432m.g	AT5G25070.1		scaffold_5:43249555-43252914	7.26052	14.4465	0.50258	0.298548	1
Ciclev10000433m.g	AT5G49910.1	chloroplast heat shock protein 70-2	scaffold_5:4974787-4979217	87.0644	84.2459	1.03346	0.322002	1
Ciclev10000434m.g	AT1G19520.1	pentatricopeptide (PPR) repeat-containing protein	scaffold_5:41132581-41135791	11.063	5.77201	1.91666	0.102706	0.783997
Ciclev10000437m.g	AT4G07960.1	Cellulose-synthase-like C12	scaffold_5:34837869-34841284	90.8206	60.6745	1.49685	0.00146357	0.0310683
Ciclev10000438m.g	AT3G05270.1	Plant protein of unknown function (DUF869)	scaffold_5:37407958-37411524	2.85797	1.50932	1.89355	0.670509	1
Ciclev10000439m.g	AT5G58270.1	ABC transporter of the mitochondrion 3	scaffold_5:14967947-14980202	26.4493	25.7797	1.02597	0.583725	1
Ciclev10000440m.g	AT4G11160.1	Translation initiation factor 2, small GTP-binding protein	scaffold_5:29817690-29822386	11.46	11.8605	0.966232	0.839098	1
Ciclev10000444m.g	AT5G45380.1	solute:sodium symporters;urea transmembrane transporters	scaffold_5:27554715-27559349	82.4422	58.1178	1.41854	0.0069218	0.113177
Ciclev10000445m.g	AT3G26540.1	Tetratricopeptide repeat (TPR)-like superfamily protein	scaffold_5:38078578-38080699	2.62257	3.05449	0.858595	1	1
Ciclev10000447m.g	AT5G63770.1	diacylglycerol kinase 2	scaffold_5:15564479-15571647	3.71795	7.41917	0.501127	0.399018	1
Ciclev10000448m.g	AT2G13600.1	Pentatricopeptide repeat (PPR) superfamily protein	scaffold_5:17103752-17105870	3.19672	4.6101	0.693417	1	1
Ciclev10000450m.g	AT1G21590.1	Protein kinase protein with adenine nucleotide alpha hydrolases-like domain	scaffold_5:42121458-42125439	34.5642	50.3907	0.685924	0.280367	1
Ciclev10000451m.g	AT5G42310.1	Pentatricopeptide repeat (PPR-like) superfamily protein	scaffold_5:42626290-42630000	8.51434	5.32553	1.59878	0.438889	1
Ciclev10000454m.g	AT5G28300.1	Duplicated homeodomain-like superfamily protein	scaffold_5:29808452-29811460	1.21696	0.674983	1.80295	0.60305	1
Ciclev10000456m.g	AT1G10240.1	FAR1-related sequence 11	scaffold_5:2200715-2205513	13.7167	11.9617	1.14672	0.557122	1
Ciclev10000457m.g	AT1G71810.1	Protein kinase superfamily protein	scaffold_5:39227920-39237745	11.6267	10.8518	1.07141	0.678615	1
Ciclev10000458m.g	AT4G24490.1	RAB geranylgeranyl transferase alpha subunit 1	scaffold_5:35517170-35521219	13.3645	17.7924	0.751135	0.85978	1
Ciclev10000459m.g	AT5G42940.1	RING/U-box superfamily protein	scaffold_5:40007932-40012920	33.9605	51.1966	0.663335	0.194936	1
Ciclev10000461m.g	AT5G27600.1	long-chain acyl-CoA synthetase 7	scaffold_5:32951374-32963622	23.9529	26.7849	0.894269	1	1
Ciclev10000462m.g	AT1G31814.1	FRIGIDA like 2	scaffold_5:31075839-31079709	1.32558	1.63459	0.810956	1	1
Ciclev10000463m.g	AT1G78240.1	S-adenosyl-L-methionine-dependent methyltransferases superfamily protein	scaffold_5:36317431-36322995	21.0672	35.604	0.591709	0.189504	1
Ciclev10000464m.g	AT1G16120.1	wall associated kinase-like 1	scaffold_5:5001604-5005111	3.31155	4.38479	0.755236	1	1
Ciclev10000465m.g	AT1G58200.1	MSCS-like 3	scaffold_5:35598114-35604350	69.6852	126.291	0.551783	0.00161605	0.0339735
Ciclev10000466m.g	AT1G77590.1	long chain acyl-CoA synthetase 9	scaffold_5:37349892-37356610	2.16133	3.52898	0.612452	1	1
Ciclev10000467m.g	AT1G61010.1	cleavage and polyadenylation specificity factor 73-I	scaffold_5:6756342-6760450	17.6376	12.8706	1.37038	0.280059	1
Ciclev10000468m.g	AT1G61010.1	cleavage and polyadenylation specificity factor 73-I	scaffold_5:6764540-6768459	5.2733	5.38675	0.978939	1	1
Ciclev10000469m.g	AT4G24520.1	P450 reductase 1	scaffold_5:35542503-35548256	41.9951	28.4502	1.47609	0.0429354	0.448895
Ciclev10000471m.g	AT1G78230.1	Outer arm dynein light chain 1 protein	scaffold_5:36327602-36331343	14.4548	21.3496	0.677052	0.511316	1
Ciclev10000476m.g	AT1G51580.1	RNA-binding KH domain-containing protein	scaffold_5:34994036-35002166	11.9226	10.5177	1.13357	0.678615	1
Ciclev10000478m.g	AT4G08210.1	Pentatricopeptide repeat (PPR-like) superfamily protein	scaffold_5:37082517-37084817	3.06863	4.63013	0.662752	1	1
Ciclev10000479m.g	AT1G09600.1	Protein kinase superfamily protein	scaffold_5:2479777-2485129	0.970988	0.69879	1.38953	1	1
Ciclev10000480m.g	AT1G77280.1	Protein kinase protein with adenine nucleotide alpha hydrolases-like domain	scaffold_5:16238638-16242339	11.0821	6.26853	1.76789	0.17312	1
Ciclev10000481m.g	AT1G20670.1	DNA-binding bromodomain-containing protein	scaffold_5:42782826-42787711	9.01225	22.6937	0.397126	0.079539	0.669852
Ciclev10000482m.g	AT1G09000.1	NPK1-related protein kinase 1	scaffold_5:32912953-32917197	2.15197	2.19142	0.981998	1	1
Ciclev10000483m.g	AT1G75260.1	oxidoreductases, acting on NADH or NADPH	scaffold_5:41138185-41140305	0.808099	1.05718	0.764391	1	1
Ciclev10000484m.g	AT1G71240.1	Plant protein of unknown function (DUF639)	scaffold_5:11336688-11346938	9.05638	11.8533	0.764039	1	1
Ciclev10000487m.g	AT4G19020.1	chromomethylase 2	scaffold_5:25805803-25815252	1.37023	0.779862	1.75702	0.60305	1
Ciclev10000488m.g	AT5G16860.1	Tetratricopeptide repeat (TPR)-like superfamily protein	scaffold_5:27589715-27592562	3.51295	3.5531	0.9887	1	1
Ciclev10000490m.g	AT5G45300.1	beta-amylase 2	scaffold_5:29131688-29139331	25.4528	24.6295	1.03343	0.577139	1
Ciclev10000491m.g	AT1G59750.4	auxin response factor 1	scaffold_5:953166-960232	36.8073	52.9226	0.695493	0.292075	1
Ciclev10000494m.g	AT3G04750.1	Tetratricopeptide repeat (TPR)-like superfamily protein	scaffold_5:29424164-29437482	1.93574	3.05413	0.633811	0.691172	1
Ciclev10000495m.g	AT1G77010.1	Pentatricopeptide repeat (PPR) superfamily protein	scaffold_5:38081414-38083994	2.54455	3.75598	0.677466	1	1
Ciclev10000500m.g	AT1G56560.1	Plant neutral invertase family protein	scaffold_5:34232950-34237382	45.4175	52.3198	0.868075	1	1
Ciclev10000502m.g	AT5G09590.1	mitochondrial HSO70 2	scaffold_5:5323875-5327356	9.10668	8.2321	1.10624	0.651625	1
Ciclev10000504m.g	AT3G05420.2	acyl-CoA binding protein 4	scaffold_5:33233157-33240431	16.8253	17.5377	0.959379	0.86685	1
Ciclev10000505m.g	AT1G60995.1		scaffold_5:9223467-9232859	35.0782	35.0249	1.00152	0.637406	1
Ciclev10000508m.g	AT1G75410.1	BEL1-like homeodomain 3	scaffold_5:41372512-41377106	2.75857	3.67953	0.749707	1	1
Ciclev10000510m.g	AT4G37870.1	phosphoenolpyruvate carboxykinase 1	scaffold_5:35125018-35129817	0.635886	1.0595	0.600176	1	1
Ciclev10000511m.g	AT2G23450.1	Protein kinase superfamily protein	scaffold_5:40608944-40612620	1.05463	0.12714	8.29503	0.60305	1
Ciclev10000513m.g	AT5G58300.1	Leucine-rich repeat protein kinase family protein	scaffold_5:15187009-15191417	2.80679	1.45313	1.93155	0.670509	1
Ciclev10000514m.g	AT3G52640.1	Zn-dependent exopeptidases superfamily protein	scaffold_5:26960451-26976490	24.5376	22.6683	1.08246	0.474012	1
Ciclev10000515m.g	AT2G33580.1	Protein kinase superfamily protein	scaffold_5:43170340-43172802	33.3463	29.7988	1.11905	0.31971	1
Ciclev10000518m.g	AT5G43020.1	Leucine-rich repeat protein kinase family protein	scaffold_5:39934354-39937311	0.586111	2.19567	0.266939	0.627943	1
Ciclev10000521m.g	AT1G77990.1	STAS domain / Sulfate transporter family	scaffold_5:36698868-36703010	85.4495	61.9841	1.37857	0.00649042	0.108019
Ciclev10000524m.g	AT1G73100.1	SU(VAR)3-9 homolog 3	scaffold_5:19682578-19686163	10.6279	8.84441	1.20165	0.507541	1
Ciclev10000525m.g	AT1G10910.1	Pentatricopeptide repeat (PPR) superfamily protein	scaffold_5:9928430-9935604	23.1246	17.7622	1.3019	0.216266	1
Ciclev10000527m.g	AT3G05340.1	Tetratricopeptide repeat (TPR)-like superfamily protein	scaffold_5:32937344-32939324	3.00142	2.86997	1.0458	0.712829	1
Ciclev10000528m.g	AT1G22150.1	sulfate transporter 1;3	scaffold_5:36680107-36686830	95.2819	77.8592	1.22377	0.033125	0.371319
Ciclev10000531m.g	AT5G28540.1	heat shock protein 70 (Hsp 70) family protein	scaffold_5:33273052-33276013	2.11668	0.640158	3.3065	0.346714	1
Ciclev10000532m.g	AT1G49890.1	Family of unknown function (DUF566)	scaffold_5:34533360-34540306	7.8528	7.62376	1.03004	0.808221	1
Ciclev10000533m.g	AT1G35510.1	O-fucosyltransferase family protein	scaffold_5:39292572-39299263	5.2021	4.79028	1.08597	0.764943	1
Ciclev10000534m.g	AT1G75140.1		scaffold_5:40929752-40932152	14.2566	16.2124	0.879364	1	1
Ciclev10000536m.g	AT1G10090.1	Early-responsive to dehydration stress protein (ERD4)	scaffold_5:24115896-24122184	0.133904	0.37825	0.354009	1	1
Ciclev10000537m.g	AT4G34110.1	poly(A) binding protein 2	scaffold_5:39992233-39996269	86.9468	99.1507	0.876916	0.941709	1
Ciclev10000538m.g	AT1G18610.1	Galactose oxidase/kelch repeat superfamily protein	scaffold_5:34128462-34131986	0.416113	0.166016	2.50646	1	1
Ciclev10000539m.g	AT5G01720.1	RNI-like superfamily protein	scaffold_5:12689295-12694012	2.03317	2.13173	0.953765	1	1
Ciclev10000541m.g	AT5G27540.1	MIRO-related GTP-ase 1	scaffold_5:32889613-32896199	37.3453	38.3284	0.974351	0.732192	1
Ciclev10000542m.g	AT4G24430.1	Rhamnogalacturonate lyase family protein	scaffold_5:35350023-35354136	1e-05	0.0773844	0.000129225	1	1
Ciclev10000543m.g	AT1G09890.1	Rhamnogalacturonate lyase family protein	scaffold_5:35320977-35325107	0.29186	0.545088	0.535436	1	1
Ciclev10000547m.g	AT1G34320.1	Protein of unknown function (DUF668)	scaffold_5:39534245-39541218	16.4805	15.1486	1.08792	0.605602	1
Ciclev10000549m.g	AT3G05270.1	Plant protein of unknown function (DUF869)	scaffold_5:15594240-15600036	10.7606	6.25911	1.71919	0.245982	1
Ciclev10000550m.g	AT3G49170.1	Tetratricopeptide repeat (TPR)-like superfamily protein	scaffold_5:35237123-35239618	11.8384	8.83933	1.33929	0.386826	1
Ciclev10000551m.g	AT2G35540.1	DNAJ heat shock N-terminal domain-containing protein	scaffold_5:26539930-26542156	2.82001	1.6095	1.7521	0.670509	1
Ciclev10000552m.g	AT5G27220.1	Frigida-like protein	scaffold_5:31325787-31328723	0.0335288	0.0538039	0.623167	1	1
Ciclev10000554m.g	AT4G33400.1	Vacuolar import/degradation, Vid27-related protein	scaffold_5:40196231-40199730	1.54078	2.13574	0.721427	1	1
Ciclev10000557m.g	AT2G13610.1	ABC-2 type transporter family protein	scaffold_5:17106093-17108296	0.196393	0.0390585	5.02818	1	1
Ciclev10000558m.g	AT5G27920.1	F-box family protein	scaffold_5:33698384-33702211	19.6186	22.7653	0.861776	1	1
Ciclev10000559m.g	AT1G43620.1	UDP-Glycosyltransferase superfamily protein	scaffold_5:38753374-38762034	12.3234	11.3944	1.08153	0.690234	1
Ciclev10000562m.g	AT5G27950.1	P-loop containing nucleoside triphosphate hydrolases superfamily protein	scaffold_5:30804009-30807677	2.8233	2.48075	1.13808	1	1
Ciclev10000564m.g	AT5G49980.1	auxin F-box protein 5	scaffold_5:35862624-35867133	42.246	13.8835	3.04289	1.41e-05	0.000497757
Ciclev10000565m.g	AT5G43100.1	Eukaryotic aspartyl protease family protein	scaffold_5:34395663-34402100	43.2737	53.5567	0.807998	0.761619	1
Ciclev10000566m.g	AT4G35240.1	Protein of unknown function (DUF630 and DUF632)	scaffold_5:42555316-42559854	0.764702	0.543589	1.40677	1	1
Ciclev10000567m.g	AT4G09730.1	RH39	scaffold_5:39146389-39150157	34.0514	32.7658	1.03924	0.467748	1
Ciclev10000570m.g	AT3G05350.1	Metallopeptidase M24 family protein	scaffold_5:32951374-32963622	40.9918	34.4567	1.18966	0.250355	1
Ciclev10000571m.g	AT3G48670.1	XH/XS domain-containing protein	scaffold_5:12159642-12164071	3.65676	2.3577	1.55099	0.712829	1
Ciclev10000572m.g	AT5G64550.1	loricrin-related	scaffold_5:22271542-22276598	13.1004	9.16669	1.42913	0.308513	1
Ciclev10000573m.g	AT1G43690.1	ubiquitin interaction motif-containing protein	scaffold_5:38609929-38615996	18.1588	26.0133	0.698058	0.464725	1
Ciclev10000574m.g	AT4G23180.1	cysteine-rich RLK (RECEPTOR-like protein kinase) 10	scaffold_5:30857555-30860780	27.2924	26.9218	1.01377	0.590121	1
Ciclev10000575m.g	AT2G26920.1	Ubiquitin-associated/translation elongation factor EF1B protein	scaffold_5:20140864-20144990	15.2675	41.5143	0.367765	0.00350263	0.0640686
Ciclev10000576m.g	AT3G52430.1	alpha/beta-Hydrolases superfamily protein	scaffold_5:15998433-16007071	31.2395	74.6862	0.418277	0.000440609	0.0109715
Ciclev10000577m.g	AT5G59100.1	Subtilisin-like serine endopeptidase family protein	scaffold_5:19103572-19108067	4.53424	7.01951	0.645948	0.590842	1
Ciclev10000581m.g	AT4G23180.1	cysteine-rich RLK (RECEPTOR-like protein kinase) 10	scaffold_5:32148510-32153975	5.19253	4.87011	1.0662	0.764943	1
Ciclev10000582m.g	AT1G72090.1	Methylthiotransferase	scaffold_5:39782165-39791254	11.7142	7.40296	1.58237	0.268133	1
Ciclev10000583m.g	AT3G02280.1	Flavodoxin family protein	scaffold_5:37295740-37302243	9.46843	5.57683	1.69782	0.222412	1
Ciclev10000585m.g	AT1G53570.1	mitogen-activated protein kinase kinase kinase 3	scaffold_5:17906312-17911447	121.135	191.362	0.633015	0.0046355	0.0810777
Ciclev10000586m.g	AT3G05740.1	RECQ helicase l1	scaffold_5:33902777-33906708	0.165763	0.13318	1.24465	1	1
Ciclev10000587m.g	AT5G39450.1	F-box family protein	scaffold_5:16129645-16133090	35.9678	47.8259	0.752057	0.512344	1
Ciclev10000591m.g	AT4G08920.1	cryptochrome 1	scaffold_5:36371906-36378249	30.701	18.934	1.62147	0.0339271	0.378359
Ciclev10000592m.g	AT5G52560.1	UDP-sugar pyrophosphorylase	scaffold_5:37876853-37884032	22.7285	39.0289	0.582351	0.102505	0.783991
Ciclev10000593m.g	AT1G76890.2	Duplicated homeodomain-like superfamily protein	scaffold_5:38658342-38661581	14.8358	18.1156	0.818952	0.863969	1
Ciclev10000595m.g	AT1G76550.1	Phosphofructokinase family protein	scaffold_5:43060441-43066562	48.1089	46.9982	1.02363	0.415515	1
Ciclev10000596m.g	AT5G45275.1	Major facilitator superfamily protein	scaffold_5:28837054-28840605	8.41003	13.1862	0.63779	0.53395	1
Ciclev10000597m.g	AT1G71830.1	somatic embryogenesis receptor-like kinase 1	scaffold_5:39630110-39635609	6.79407	3.17551	2.13952	0.367264	1
Ciclev10000599m.g	AT1G54510.1	NIMA-related serine/threonine kinase 1	scaffold_5:29840773-29846737	0.894196	1.13413	0.788442	1	1
Ciclev10000600m.g	AT5G49720.1	glycosyl hydrolase 9A1	scaffold_5:113390-116883	23.4468	20.9636	1.11845	0.455621	1
Ciclev10000601m.g	AT1G43245.1	SET domain-containing protein	scaffold_5:38772866-38775306	2.83982	2.10002	1.35228	1	1
Ciclev10000602m.g	AT5G27330.1	Prefoldin chaperone subunit family protein	scaffold_5:32296452-32298508	0.108999	0.374018	0.291427	1	1
Ciclev10000603m.g	AT4G24620.1	phosphoglucose isomerase 1	scaffold_5:35757161-35762784	33.6314	22.9662	1.46439	0.0626426	0.577504
Ciclev10000604m.g	AT1G19715.3	Mannose-binding lectin superfamily protein	scaffold_5:41409272-41411910	21.5801	25.7162	0.839164	1	1
Ciclev10000605m.g	AT1G09900.1	Pentatricopeptide repeat (PPR-like) superfamily protein	scaffold_5:35262240-35264675	17.8779	9.36284	1.90945	0.0868369	0.704632
Ciclev10000608m.g	AT3G20770.1	Ethylene insensitive 3 family protein	scaffold_5:24103195-24107361	119.075	108.178	1.10073	0.0979124	0.760755
Ciclev10000610m.g	AT1G11050.1	Protein kinase superfamily protein	scaffold_5:37707495-37709444	3.47865	5.41105	0.642879	0.758707	1
Ciclev10000611m.g	AT1G76400.1	Ribophorin I	scaffold_5:42898493-42904653	21.7183	23.1219	0.939296	1	1
Ciclev10000612m.g	AT1G34190.1	NAC domain containing protein 17	scaffold_5:39216417-39219746	90.3679	133.625	0.67628	0.0611751	0.566108
Ciclev10000613m.g	AT1G30755.1	Protein of unknown function (DUF668)	scaffold_5:41957505-41962278	162.101	274.801	0.589885	5.49e-05	0.0016722
Ciclev10000614m.g	AT2G33640.1	DHHC-type zinc finger family protein	scaffold_5:42888592-42893193	0.777769	0.500224	1.55484	1	1
Ciclev10000617m.g	AT3G20770.1	Ethylene insensitive 3 family protein	scaffold_5:24110460-24114358	55.3802	55.1035	1.00502	0.509262	1
Ciclev10000618m.g	AT1G11050.1	Protein kinase superfamily protein	scaffold_5:37701505-37703583	84.9967	85.9996	0.988338	0.490586	1
Ciclev10000620m.g	AT5G18570.1	GTP1/OBG family protein	scaffold_5:41455031-41460155	12.291	10.6316	1.15608	0.542021	1
Ciclev10000621m.g	AT4G24040.1	trehalase 1	scaffold_5:6028330-6034400	14.0899	15.25	0.923928	0.859748	1
Ciclev10000622m.g	AT1G09710.1	Homeodomain-like superfamily protein	scaffold_5:35548958-35554067	20.3207	16.5149	1.23045	0.331583	1
Ciclev10000623m.g	AT4G23180.1	cysteine-rich RLK (RECEPTOR-like protein kinase) 10	scaffold_5:32186366-32189739	1.94235	1.89947	1.02257	1	1
Ciclev10000624m.g	AT1G19025.1	DNA repair metallo-beta-lactamase family protein	scaffold_5:17900801-17904488	1.46464	0.90732	1.61425	0.60305	1
Ciclev10000625m.g	AT5G58320.2	Kinase interacting (KIP1-like) family protein	scaffold_5:15344389-15349025	19.4684	12.5287	1.5539	0.119824	0.857789
Ciclev10000627m.g	AT1G76880.1	Duplicated homeodomain-like superfamily protein	scaffold_5:38669122-38672110	23.1722	13.5374	1.71172	0.0509017	0.504174
Ciclev10000628m.g	AT1G08490.1	chloroplastic NIFS-like cysteine desulfurase	scaffold_5:18239993-18242476	0.113785	0.0457137	2.48908	1	1
Ciclev10000629m.g	AT3G48090.1	alpha/beta-Hydrolases superfamily protein	scaffold_5:1130225-1132747	0.572895	0.707669	0.809552	1	1
Ciclev10000630m.g	AT1G56570.1	Tetratricopeptide repeat (TPR)-like superfamily protein	scaffold_5:34230287-34232445	4.59	4.42901	1.03635	1	1
Ciclev10000631m.g	AT5G09860.1	nuclear matrix protein-related	scaffold_5:21144033-21157038	17.0796	17.1291	0.99711	0.74051	1
Ciclev10000632m.g	AT1G09280.1		scaffold_5:34207131-34210961	7.31238	4.8433	1.50979	0.405966	1
Ciclev10000635m.g	AT1G36990.1		scaffold_5:36931439-36936819	12.7775	12.8399	0.99514	0.844978	1
Ciclev10000637m.g	AT4G24290.2	MAC/Perforin domain-containing protein	scaffold_5:5087959-5093839	84.9487	130.36	0.651647	0.028985	0.340308
Ciclev10000638m.g	AT1G31920.1	Tetratricopeptide repeat (TPR)-like superfamily protein	scaffold_5:26493800-26495822	3.85589	4.13003	0.933623	1	1
Ciclev10000639m.g	AT1G59740.1	Major facilitator superfamily protein	scaffold_5:885889-888954	3.04934	0.768212	3.9694	0.193115	1
Ciclev10000643m.g	AT1G31850.1	S-adenosyl-L-methionine-dependent methyltransferases superfamily protein	scaffold_5:24399708-24405331	40.7317	61.138	0.666226	0.167063	1
Ciclev10000645m.g	AT5G58350.1	with no lysine (K) kinase 4	scaffold_5:13531936-13535930	98.7157	47.6167	2.07313	7.72e-07	3.51e-05
Ciclev10000648m.g	AT1G31420.2	Leucine-rich repeat protein kinase family protein	scaffold_5:27842975-27853846	31.598	25.2145	1.25317	0.236534	1
Ciclev10000649m.g	AT5G26820.1	iron-regulated protein 3	scaffold_5:34121548-34126463	16.6286	14.0386	1.18449	0.485209	1
Ciclev10000650m.g	AT3G12270.1	protein arginine methyltransferase 3	scaffold_5:21243492-21247521	7.69705	4.60909	1.66997	0.405966	1
Ciclev10000651m.g	AT4G34200.1	D-3-phosphoglycerate dehydrogenase	scaffold_5:39858530-39862402	7.44487	6.76769	1.10006	0.796981	1
Ciclev10000652m.g	AT1G38131.1	O-fucosyltransferase family protein	scaffold_5:37086126-37091907	0.778743	0.426558	1.82564	1	1
Ciclev10000653m.g	AT4G23180.1	cysteine-rich RLK (RECEPTOR-like protein kinase) 10	scaffold_5:32017898-32022118	19.4185	25.0974	0.773726	0.661153	1
Ciclev10000654m.g	AT2G38470.1	WRKY DNA-binding protein 33	scaffold_5:12677413-12680761	604.667	380.467	1.58928	7.07e-20	1.25e-17
Ciclev10000656m.g	AT1G22020.1	serine hydroxymethyltransferase 6	scaffold_5:36848456-36853497	63.2908	102.41	0.618014	0.0297088	0.345285
Ciclev10000657m.g	AT2G01970.1	Endomembrane protein 70 protein family	scaffold_5:477921-482332	12.5861	15.0071	0.838676	0.854715	1
Ciclev10000659m.g	AT3G18600.1	P-loop containing nucleoside triphosphate hydrolases superfamily protein	scaffold_5:9197773-9204364	23.272	22.8346	1.01916	0.563374	1
Ciclev10000662m.g	AT5G50350.1		scaffold_5:24313313-24318602	6.36527	7.17793	0.886784	1	1
Ciclev10000670m.g	AT1G10950.1	transmembrane nine 1	scaffold_5:8440415-8447120	94.3333	114.409	0.824527	0.678359	1
Ciclev10000671m.g	AT1G21450.1	SCARECROW-like 1	scaffold_5:38177342-38180338	49.8527	69.2	0.720415	0.272919	1
Ciclev10000672m.g	AT1G58025.3	DNA-binding bromodomain-containing protein	scaffold_5:5328722-5334079	26.4939	24.0566	1.10132	0.489532	1
Ciclev10000673m.g	AT2G30520.1	Phototropic-responsive NPH3 family protein	scaffold_5:15113861-15117721	28.8842	54.1016	0.533888	0.0282166	0.336331
Ciclev10000678m.g	AT5G42350.1	Galactose oxidase/kelch repeat superfamily protein	scaffold_5:42845471-42848054	5.04938	10.1148	0.499207	0.467333	1
Ciclev10000682m.g	AT4G09160.1	SEC14 cytosolic factor family protein / phosphoglyceride transfer family protein	scaffold_5:39700146-39702942	32.9602	66.6147	0.494789	0.00653438	0.108566
Ciclev10000685m.g	AT2G32910.1	DCD (Development and Cell Death) domain protein	scaffold_5:31437533-31441415	12.1042	13.0715	0.925999	1	1
Ciclev10000688m.g	AT1G08490.1	chloroplastic NIFS-like cysteine desulfurase	scaffold_5:18358820-18361410	0.95562	0.462416	2.06658	1	1
Ciclev10000689m.g	AT1G57770.1	FAD/NAD(P)-binding oxidoreductase family protein	scaffold_5:4471259-4476173	13.4154	13.818	0.970864	0.850339	1
Ciclev10000690m.g	AT1G31970.1	DEA(D/H)-box RNA helicase family protein	scaffold_5:25999616-26006856	50.9837	51.2332	0.99513	0.622155	1
Ciclev10000691m.g	AT1G22660.1	Polynucleotide adenylyltransferase family protein	scaffold_5:39356005-39361396	3.50301	2.52758	1.38591	0.712829	1
Ciclev10000692m.g	AT1G45207.2	Remorin family protein	scaffold_5:40112334-40116721	0.59597	0.650701	0.915889	1	1
Ciclev10000693m.g	AT1G77850.1	auxin response factor 17	scaffold_5:36863308-36868015	5.44566	3.18651	1.70897	0.530721	1
Ciclev10000694m.g	AT3G18150.1	RNI-like superfamily protein	scaffold_5:17595312-17598089	11.3064	9.77321	1.15688	0.525565	1
Ciclev10000698m.g	AT1G54610.1	Protein kinase superfamily protein	scaffold_5:30994811-30999834	9.42199	8.41581	1.11956	0.651625	1
Ciclev10000699m.g	AT4G19040.1	ENHANCED DISEASE RESISTANCE 2	scaffold_5:24819165-24829795	40.2262	50.2905	0.799877	0.677409	1
Ciclev10000702m.g	AT1G58100.1	TCP family transcription factor	scaffold_5:6482365-6484923	16.0251	10.3238	1.55225	0.184398	1
Ciclev10000704m.g	AT1G09195.2		scaffold_5:33886877-33891304	6.40889	10.0298	0.638985	0.638323	1
Ciclev10000706m.g	AT1G22460.1	O-fucosyltransferase family protein	scaffold_5:36090417-36095771	34.6489	31.594	1.09669	0.393647	1
Ciclev10000707m.g	AT1G20110.1	RING/FYVE/PHD zinc finger superfamily protein	scaffold_5:42139641-42144610	36.3905	41.7707	0.871197	1	1
Ciclev10000708m.g	AT1G76270.1	O-fucosyltransferase family protein	scaffold_5:42601357-42605843	11.5196	9.05295	1.27247	0.525565	1
Ciclev10000709m.g	AT1G75450.1	cytokinin oxidase 5	scaffold_5:41394567-41399755	4.6265	12.2754	0.376892	0.154838	0.982651
Ciclev10000710m.g	AT5G57190.1	phosphatidylserine decarboxylase 2	scaffold_5:21809061-21827750	47.0009	53.7962	0.873684	1	1
Ciclev10000711m.g	AT2G32910.1	DCD (Development and Cell Death) domain protein	scaffold_5:31424465-31428834	3.81489	3.71298	1.02745	1	1
Ciclev10000713m.g	AT1G09810.1	evolutionarily conserved C-terminal region 11	scaffold_5:5309894-5315706	61.8928	89.7049	0.68996	0.143625	0.946477
Ciclev10000716m.g			scaffold_5:31001059-31004619	6.08703	2.36156	2.57755	0.205666	1
Ciclev10000719m.g	AT1G22540.1	Major facilitator superfamily protein	scaffold_5:39705412-39708788	33.0503	33.8522	0.976312	0.628418	1
Ciclev10000720m.g	AT5G25800.1	Polynucleotidyl transferase, ribonuclease H-like superfamily protein	scaffold_5:38180687-38186303	6.07314	6.06066	1.00206	1	1
Ciclev10000721m.g	AT1G77140.1	vacuolar protein sorting 45	scaffold_5:38379424-38384975	15.2706	20.0374	0.762105	0.74281	1
Ciclev10000722m.g	AT5G42740.1	Sugar isomerase (SIS) family protein	scaffold_5:40972046-40979507	40.7214	86.3398	0.471641	0.000727037	0.0168797
Ciclev10000723m.g	AT2G20340.1	Pyridoxal phosphate (PLP)-dependent transferases superfamily protein	scaffold_5:39740866-39742793	9.7523	11.3742	0.857405	1	1
Ciclev10000724m.g	AT1G65280.1	DNAJ heat shock N-terminal domain-containing protein	scaffold_5:39438263-39443543	9.15219	8.63674	1.05968	0.651625	1
Ciclev10000725m.g	AT1G77250.1	RING/FYVE/PHD-type zinc finger family protein	scaffold_5:37904978-37910963	8.94112	8.2147	1.08843	0.817333	1
Ciclev10000727m.g	AT1G20920.1	P-loop containing nucleoside triphosphate hydrolases superfamily protein	scaffold_5:15349807-15357863	27.4909	25.6897	1.07011	0.496991	1
Ciclev10000728m.g	AT5G27380.1	glutathione synthetase 2	scaffold_5:31895664-31900513	32.7851	51.2119	0.640185	0.157585	0.993639
Ciclev10000732m.g	AT5G64330.1	Phototropic-responsive NPH3 family protein	scaffold_5:32720670-32722787	0.901567	0.941998	0.95708	1	1
Ciclev10000733m.g	AT2G18750.1	Calmodulin-binding protein	scaffold_5:33879329-33882234	67.8601	90.3419	0.751148	0.340308	1
Ciclev10000734m.g	AT5G27220.1	Frigida-like protein	scaffold_5:31307195-31309895	4.49044	2.47841	1.81182	0.486694	1
Ciclev10000735m.g	AT4G19010.1	AMP-dependent synthetase and ligase family protein	scaffold_5:25965962-25969199	0.62059	0.276058	2.24804	1	1
Ciclev10000738m.g	AT1G22540.1	Major facilitator superfamily protein	scaffold_5:39713348-39716184	1.17177	0.943744	1.24162	0.60305	1
Ciclev10000739m.g	AT5G49650.1	xylulose kinase-2	scaffold_5:35022339-35027549	6.25257	5.7184	1.09341	0.782591	1
Ciclev10000740m.g	AT2G13690.1	PRLI-interacting factor, putative	scaffold_5:18156521-18160252	2.97287	1.33192	2.23202	0.670509	1
Ciclev10000741m.g	AT2G38720.1	microtubule-associated protein 65-5	scaffold_5:20581813-20588381	0.268845	0.34558	0.777953	1	1
Ciclev10000742m.g	AT1G20410.1	Pseudouridine synthase family protein	scaffold_5:42427317-42432272	6.17029	5.60632	1.1006	0.782591	1
Ciclev10000747m.g	AT3G06130.1	Heavy metal transport/detoxification superfamily protein	scaffold_5:32672661-32675477	0.791476	0.388557	2.03696	1	1
Ciclev10000749m.g	AT1G71800.1	cleavage stimulating factor 64	scaffold_5:39221209-39227401	13.2309	10.4965	1.26051	0.424739	1
Ciclev10000750m.g	AT5G16260.1	RNA binding (RRM/RBD/RNP motifs) family protein	scaffold_5:34301652-34308746	12.2046	13.568	0.899514	1	1
Ciclev10000751m.g	AT1G58340.1	MATE efflux family protein	scaffold_5:35074023-35076069	5.62985	6.59489	0.853669	1	1
Ciclev10000753m.g	AT5G27460.1	Tetratricopeptide repeat (TPR)-like superfamily protein	scaffold_5:35913858-35917123	2.09812	3.47783	0.603284	1	1
Ciclev10000754m.g	AT1G21540.1	AMP-dependent synthetase and ligase family protein	scaffold_5:37928343-37930048	2.50095	1.07647	2.32329	0.670509	1
Ciclev10000755m.g	AT1G20560.1	acyl activating enzyme 1	scaffold_5:42641055-42643541	7.79896	3.65053	2.13639	0.247291	1
Ciclev10000756m.g	AT3G11440.1	myb domain protein 65	scaffold_5:19740132-19745806	27.9565	24.4309	1.14431	0.410886	1
Ciclev10000757m.g	AT5G43820.1	Pentatricopeptide repeat (PPR) superfamily protein	scaffold_5:42824869-42827344	1.56927	1.38232	1.13524	1	1
Ciclev10000758m.g	AT3G05060.1	NOP56-like pre RNA processing ribonucleoprotein	scaffold_5:19019402-19023198	22.0601	27.8431	0.7923	0.888671	1
Ciclev10000759m.g	AT1G56310.1	Polynucleotidyl transferase, ribonuclease H-like superfamily protein	scaffold_5:33894993-33900482	2.08568	2.10524	0.990709	1	1
Ciclev10000760m.g	AT4G38430.1	rho guanyl-nucleotide exchange factor 1	scaffold_5:42409836-42412693	0.441999	0.655276	0.674523	1	1
Ciclev10000761m.g	AT1G76490.1	hydroxy methylglutaryl CoA reductase 1	scaffold_5:43016597-43020200	6.85706	10.7874	0.635655	0.638323	1
Ciclev10000762m.g	AT5G24910.1	cytochrome P450, family 714, subfamily A, polypeptide 1	scaffold_5:20554135-20561666	49.7581	95.2899	0.522176	0.00270625	0.0525986
Ciclev10000763m.g	AT1G43770.2	RING/FYVE/PHD zinc finger superfamily protein	scaffold_5:38477880-38481495	9.16575	33.0254	0.277536	0.00129399	0.0279845
Ciclev10000764m.g	AT1G20510.1	OPC-8:0 CoA ligase1	scaffold_5:42516005-42519605	62.2114	129.199	0.481516	6.72e-05	0.00201858
Ciclev10000765m.g	AT1G58290.1	Glutamyl-tRNA reductase family protein	scaffold_5:35137903-35140955	85.5974	107.446	0.796655	0.517472	1
Ciclev10000767m.g	AT4G35890.1	winged-helix DNA-binding transcription factor family protein	scaffold_5:42217934-42222257	36.9079	36.8644	1.00118	0.64177	1
Ciclev10000768m.g	AT3G57620.1	glyoxal oxidase-related protein	scaffold_5:30732823-30734566	0.224342	0.182529	1.22908	1	1
Ciclev10000769m.g	AT2G03220.1	fucosyltransferase 1	scaffold_5:20113870-20116341	47.9258	143.946	0.332943	6.6e-10	4.71e-08
Ciclev10000770m.g	AT1G76620.1	Protein of unknown function, DUF547	scaffold_5:43153229-43157156	2.15671	2.14293	1.00643	1	1
Ciclev10000772m.g	AT5G57960.1	GTP-binding protein, HflX	scaffold_5:41364332-41369139	46.7319	53.7451	0.86951	1	1
Ciclev10000775m.g	AT1G43710.1	Pyridoxal phosphate (PLP)-dependent transferases superfamily protein	scaffold_5:38559098-38562819	11.2224	19.5299	0.574627	0.376135	1
Ciclev10000776m.g	AT4G34240.1	aldehyde dehydrogenase 3I1	scaffold_5:15735613-15740485	90.8655	80.1531	1.13365	0.126283	0.882405
Ciclev10000779m.g	AT2G26510.1	Xanthine/uracil permease family protein	scaffold_5:40500030-40505210	76.7701	72.3975	1.0604	0.287965	1
Ciclev10000781m.g	AT3G05030.1	sodium hydrogen exchanger 2	scaffold_5:31069236-31075092	21.4495	21.7564	0.985894	0.763054	1
Ciclev10000782m.g	AT1G22940.1	thiamin biosynthesis protein, putative	scaffold_5:8512379-8517973	6.88842	6.92445	0.994797	1	1
Ciclev10000783m.g	AT1G76160.1	SKU5 similar 5	scaffold_5:42445213-42449994	0.442881	0.629501	0.703543	1	1
Ciclev10000784m.g	AT2G03220.1	fucosyltransferase 1	scaffold_5:20105818-20108873	27.4884	77.9344	0.352712	2.23e-05	0.000754512
Ciclev10000788m.g	AT2G30300.1	Major facilitator superfamily protein	scaffold_5:12881996-12884304	0.931721	1.10341	0.844401	1	1
Ciclev10000789m.g	AT1G20300.1	Pentatricopeptide repeat (PPR) superfamily protein	scaffold_5:42286704-42288426	5.43471	4.55077	1.19424	0.764943	1
Ciclev10000790m.g	AT5G49970.1	pyridoxin (pyrodoxamine) 5\'-phosphate oxidase	scaffold_5:35872808-35878812	12.6796	8.40741	1.50815	0.288946	1
Ciclev10000792m.g	AT1G52640.1	Pentatricopeptide repeat (PPR) superfamily protein	scaffold_5:16368132-16371600	7.54062	4.84468	1.55647	0.405966	1
Ciclev10000793m.g	AT3G52950.1	CBS / octicosapeptide/Phox/Bemp1 (PB1) domains-containing protein	scaffold_5:15579156-15591668	39.7637	44.5694	0.892175	1	1
Ciclev10000794m.g	AT1G77110.1	Auxin efflux carrier family protein	scaffold_5:38323685-38328788	0.0746165	1e-05	7461.65	1	1
Ciclev10000795m.g	AT2G16090.1	RING/U-box superfamily protein	scaffold_5:40683486-40688354	11.1331	11.4405	0.973131	0.839098	1
Ciclev10000797m.g	AT1G72040.1	P-loop containing nucleoside triphosphate hydrolases superfamily protein	scaffold_5:39306388-39310225	14.2942	9.25267	1.54487	0.230042	1
Ciclev10000798m.g	AT1G19880.1	Regulator of chromosome condensation (RCC1) family protein	scaffold_5:41672134-41678524	29.7001	36.9836	0.803061	0.806911	1
Ciclev10000799m.g	AT5G39590.1	TLD-domain containing nucleolar protein	scaffold_5:41711565-41715301	9.43557	6.25436	1.50864	0.342342	1
Ciclev10000800m.g	AT1G75210.1	HAD-superfamily hydrolase, subfamily IG, 5\'-nucleotidase	scaffold_5:41049807-41055693	16.2359	18.854	0.861138	1	1
Ciclev10000803m.g	AT1G32130.1	Transcription elongation factor (TFIIS) family protein	scaffold_5:26514898-26519011	56.0052	69.3546	0.80752	0.722247	1
Ciclev10000804m.g	AT1G72160.1	Sec14p-like phosphatidylinositol transfer family protein	scaffold_5:39693591-39696240	19.0535	11.6835	1.6308	0.0794893	0.671747
Ciclev10000806m.g	AT1G20080.1	Calcium-dependent lipid-binding (CaLB domain) family protein	scaffold_5:42079047-42083003	1.30412	1.15946	1.12476	1	1
Ciclev10000807m.g	AT5G08740.1	NAD(P)H dehydrogenase C1	scaffold_5:15623323-15630017	22.6905	22.1917	1.02248	0.768021	1
Ciclev10000808m.g	AT1G30700.1	FAD-binding Berberine family protein	scaffold_5:29385813-29387910	0.99617	1.43853	0.692492	1	1
Ciclev10000809m.g	AT4G31940.1	cytochrome P450, family 82, subfamily C, polypeptide 4	scaffold_5:26839045-26841490	42.438	46.5128	0.912394	0.916	1
Ciclev10000810m.g	AT4G20820.1	FAD-binding Berberine family protein	scaffold_5:5161093-5163853	34.3155	22.0647	1.55522	0.0477689	0.479699
Ciclev10000811m.g	AT5G44400.1	FAD-binding Berberine family protein	scaffold_5:8241246-8243511	3.5384	2.90788	1.21683	0.712829	1
Ciclev10000812m.g	AT1G21660.1	Chaperone DnaJ-domain superfamily protein	scaffold_5:37693881-37699178	52.2556	79.772	0.655062	0.117662	0.846028
Ciclev10000813m.g	AT4G20820.1	FAD-binding Berberine family protein	scaffold_5:5198673-5200885	15.9747	10.1183	1.57879	0.247458	1
Ciclev10000814m.g	AT4G20820.1	FAD-binding Berberine family protein	scaffold_5:8181010-8183247	121.209	157.573	0.769224	0.281341	1
Ciclev10000815m.g	AT5G10080.1	Eukaryotic aspartyl protease family protein	scaffold_5:36726565-36731153	4.70042	3.46783	1.35544	0.742562	1
Ciclev10000816m.g	AT3G05620.1	Plant invertase/pectin methylesterase inhibitor superfamily	scaffold_5:33695911-33697986	0.414307	0.0480191	8.62796	1	1
Ciclev10000817m.g	AT4G20820.1	FAD-binding Berberine family protein	scaffold_5:5213078-5216672	83.1414	80.5857	1.03171	0.311069	1
Ciclev10000819m.g	AT1G76430.1	phosphate transporter 1;9	scaffold_5:42959353-42961730	128.615	54.1286	2.3761	2.64e-10	1.99e-08
Ciclev10000821m.g	AT1G44446.1	Pheophorbide a oxygenase family protein with Rieske [2Fe-2S] domain	scaffold_5:37429289-37433447	9.51286	2.18594	4.35184	0.047713	0.48136
Ciclev10000822m.g	AT2G03220.1	fucosyltransferase 1	scaffold_5:20137874-20140608	38.1791	95.3692	0.400329	2.88e-05	0.000945005
Ciclev10000825m.g	AT5G42650.1	allene oxide synthase	scaffold_5:40617690-40619818	175.591	151.337	1.16026	0.0148188	0.206136
Ciclev10000826m.g	AT1G47240.1	NRAMP metal ion transporter 2	scaffold_5:34386297-34390000	6.48374	8.89485	0.728932	1	1
Ciclev10000827m.g	AT2G21520.2	Sec14p-like phosphatidylinositol transfer family protein	scaffold_5:41258613-41263689	7.5082	9.87979	0.759955	1	1
Ciclev10000828m.g	AT1G71880.1	sucrose-proton symporter 1	scaffold_5:39525922-39529412	170.857	168.703	1.01277	0.211525	1
Ciclev10000831m.g	AT1G47056.1	VIER F-box proteine 1	scaffold_5:39888653-39890854	15.8178	29.0685	0.544156	0.106138	0.789561
Ciclev10000834m.g	AT5G64630.2	Transducin/WD40 repeat-like superfamily protein	scaffold_5:18390056-18395489	5.18316	5.53277	0.936811	1	1
Ciclev10000835m.g	AT1G22410.1	Class-II DAHP synthetase family protein	scaffold_5:36196012-36199839	209.739	369.507	0.567618	2.27e-07	1.14e-05
Ciclev10000836m.g	AT5G20890.1	TCP-1/cpn60 chaperonin family protein	scaffold_5:42437642-42442753	37.5587	31.7543	1.18279	0.231934	1
Ciclev10000838m.g	AT1G20370.1	Pseudouridine synthase family protein	scaffold_5:42371840-42373931	16.5226	15.8227	1.04423	0.605602	1
Ciclev10000839m.g	AT1G58440.1	FAD/NAD(P)-binding oxidoreductase family protein	scaffold_5:34815380-34819982	12.3066	16.8275	0.731339	0.719079	1
Ciclev10000841m.g	AT1G47670.1	Transmembrane amino acid transporter family protein	scaffold_5:40534832-40539098	23.4091	17.4215	1.34369	0.216266	1
Ciclev10000842m.g	AT1G27680.1	ADPGLC-PPase large subunit	scaffold_5:41201214-41208112	13.8997	16.8886	0.823023	1	1
Ciclev10000843m.g	AT1G08960.1	cation exchanger 11	scaffold_5:32695469-32699067	13.1872	14.7748	0.892547	1	1
Ciclev10000844m.g	AT4G31940.1	cytochrome P450, family 82, subfamily C, polypeptide 4	scaffold_5:26217705-26220288	127.404	165.72	0.768791	0.26697	1
Ciclev10000845m.g	AT4G31940.1	cytochrome P450, family 82, subfamily C, polypeptide 4	scaffold_5:26866035-26868420	23.0341	4.14438	5.55791	0.000107161	0.00310719
Ciclev10000846m.g	AT4G31940.1	cytochrome P450, family 82, subfamily C, polypeptide 4	scaffold_5:26691139-26693785	4.2274	0.836879	5.05139	0.105169	0.792293
Ciclev10000847m.g	AT1G77220.1	Protein of unknown function (DUF300)	scaffold_5:38393281-38398923	31.6194	40.2761	0.785066	0.640223	1
Ciclev10000848m.g	AT2G40890.1	cytochrome P450, family 98, subfamily A, polypeptide 3	scaffold_5:20487351-20489738	2.16101	1.65141	1.30858	0.670509	1
Ciclev10000849m.g	AT1G75680.1	glycosyl hydrolase 9B7	scaffold_5:41833069-41836812	0.300781	0.201695	1.49127	1	1
Ciclev10000850m.g	AT1G34370.1	C2H2 and C2HC zinc fingers superfamily protein	scaffold_5:39495950-39498826	116.244	162.066	0.717263	0.0935883	0.741283
Ciclev10000851m.g	AT4G31940.1	cytochrome P450, family 82, subfamily C, polypeptide 4	scaffold_5:26790423-26792763	13.5168	12.6659	1.06718	0.700842	1
Ciclev10000852m.g	AT4G31970.1	cytochrome P450, family 82, subfamily C, polypeptide 2	scaffold_5:40582687-40584770	4.51949	4.25428	1.06234	1	1
Ciclev10000853m.g	AT1G34220.2	Regulator of Vps4 activity in the MVB pathway protein	scaffold_5:39626614-39629746	12.3068	11.263	1.09268	0.690234	1
Ciclev10000854m.g	AT1G43980.1	Tetratricopeptide repeat (TPR)-like superfamily protein	scaffold_5:38085441-38087688	3.70369	3.13703	1.18064	1	1
Ciclev10000855m.g	AT1G71870.1	MATE efflux family protein	scaffold_5:39559029-39561472	0.0669886	1e-05	6698.86	1	1
Ciclev10000856m.g	AT4G24460.1	CRT (chloroquine-resistance transporter)-like transporter 2	scaffold_5:35408651-35414270	1.1089	1.04346	1.06271	1	1
Ciclev10000858m.g	AT5G64600.1	O-fucosyltransferase family protein	scaffold_5:18221784-18227885	6.31339	4.82305	1.309	0.565572	1
Ciclev10000859m.g	AT3G10660.1	calmodulin-domain protein kinase cdpk isoform 2	scaffold_5:24321451-24323997	0.123322	0.495792	0.248737	1	1
Ciclev10000860m.g	AT4G12320.1	cytochrome P450, family 706, subfamily A, polypeptide 6	scaffold_5:7063960-7066280	1e-05	0.0481587	0.000207647	1	1
Ciclev10000861m.g	AT1G78130.1	Major facilitator superfamily protein	scaffold_5:36475617-36479093	5.61767	7.15003	0.785685	0.796225	1
Ciclev10000863m.g	AT5G58370.2	P-loop containing nucleoside triphosphate hydrolases superfamily protein	scaffold_5:13199739-13204599	8.15214	8.3764	0.973227	0.817333	1
Ciclev10000865m.g	AT4G02630.1	Protein kinase superfamily protein	scaffold_5:40025747-40029150	12.2451	20.4294	0.599386	0.390791	1
Ciclev10000866m.g	AT3G26300.1	cytochrome P450, family 71, subfamily B, polypeptide 34	scaffold_5:147384-149164	1.44593	2.43099	0.594791	1	1
Ciclev10000867m.g	AT5G18475.1	Pentatricopeptide repeat (PPR) superfamily protein	scaffold_5:35771867-35774649	4.03694	5.83594	0.691738	1	1
Ciclev10000869m.g	AT5G49820.1	Protein of unknown function, DUF647	scaffold_5:833390-839741	8.7914	40.122	0.219117	2.64e-05	0.000873949
Ciclev10000871m.g	AT5G10920.1	L-Aspartase-like family protein	scaffold_5:35574051-35577732	19.3957	15.5189	1.24981	0.319644	1
Ciclev10000874m.g	AT3G06350.1	dehydroquinate dehydratase, putative / shikimate dehydrogenase, putative	scaffold_5:31403726-31408001	35.716	192.123	0.185902	4.02e-23	8.46e-21
Ciclev10000875m.g	AT5G26780.1	serine hydroxymethyltransferase 2	scaffold_5:35241679-35246264	14.1103	11.5074	1.22619	0.44168	1
Ciclev10000876m.g	AT5G09890.1	Protein kinase family protein	scaffold_5:40154568-40160983	49.2968	169.043	0.291623	1.65e-13	1.78e-11
Ciclev10000877m.g	AT1G09830.1	Glycinamide ribonucleotide (GAR) synthetase	scaffold_5:4939532-4944344	8.19343	6.12656	1.33736	0.465725	1
Ciclev10000878m.g	AT1G28390.1	Protein kinase superfamily protein	scaffold_5:35840434-35842867	2.5811	3.20749	0.80471	1	1
Ciclev10000880m.g	AT4G24530.1	O-fucosyltransferase family protein	scaffold_5:35604950-35608649	4.65519	3.89694	1.19458	0.742562	1
Ciclev10000881m.g	AT4G33280.1	AP2/B3-like transcriptional factor family protein	scaffold_5:40550221-40554434	15.2331	9.22417	1.65143	0.168741	1
Ciclev10000884m.g	AT5G25900.1	GA requiring 3	scaffold_5:4487162-4490184	37.5935	15.6318	2.40494	0.000566212	0.0135476
Ciclev10000885m.g			scaffold_5:28802466-28809144	5.83236	3.3665	1.73247	0.530721	1
Ciclev10000886m.g	AT4G31500.1	cytochrome P450, family 83, subfamily B, polypeptide 1	scaffold_5:24344328-24346552	4.37645	2.7051	1.61785	0.486694	1
Ciclev10000887m.g	AT1G21380.1	Target of Myb protein 1	scaffold_5:38059020-38064414	45.071	53.7688	0.838237	0.920294	1
Ciclev10000889m.g	AT1G19440.1	3-ketoacyl-CoA synthase 4	scaffold_5:41081415-41083138	3.88286	9.29512	0.417731	0.19153	1
Ciclev10000890m.g	AT1G10790.1		scaffold_5:9999885-10003989	5.51828	2.62581	2.10155	0.320917	1
Ciclev10000891m.g	AT2G01070.1	Lung seven transmembrane receptor family protein	scaffold_5:12168883-12172755	11.6065	27.4334	0.423079	0.0386584	0.417793
Ciclev10000893m.g	AT5G45290.1	RING/U-box superfamily protein	scaffold_5:29125854-29130238	2.68044	2.2562	1.18803	1	1
Ciclev10000894m.g	AT1G71720.1	Nucleic acid-binding proteins superfamily	scaffold_5:39126563-39130916	12.9711	15.0572	0.861455	0.854715	1
Ciclev10000895m.g	AT5G10610.1	cytochrome P450, family 81, subfamily K, polypeptide 1	scaffold_5:34312616-34314987	42.2585	58.9182	0.71724	0.372435	1
Ciclev10000897m.g	AT1G76040.2	calcium-dependent protein kinase 29	scaffold_5:42272202-42276387	4.52517	5.0334	0.899028	1	1
Ciclev10000901m.g	AT1G33980.1	Smg-4/UPF3 family protein	scaffold_5:4461970-4470737	17.3091	14.8789	1.16333	0.389024	1
Ciclev10000902m.g	AT5G25900.1	GA requiring 3	scaffold_5:4498791-4501743	1.78219	0.971018	1.83538	0.60305	1
Ciclev10000905m.g	AT1G75130.1	cytochrome P450, family 721, subfamily A, polypeptide 1	scaffold_5:40878422-40882623	1.82827	1.77128	1.03217	1	1
Ciclev10000906m.g	AT4G35230.1	BR-signaling kinase 1	scaffold_5:42545538-42550588	49.3582	47.5581	1.03785	0.419757	1
Ciclev10000909m.g	AT4G24250.1	Seven transmembrane MLO family protein	scaffold_5:101796-108313	0.108235	0.131347	0.824039	1	1
Ciclev10000910m.g	AT4G16580.1	Protein phosphatase 2C family protein	scaffold_5:40872792-40877775	28.8526	33.2137	0.868696	1	1
Ciclev10000913m.g			scaffold_5:36638720-36641298	1e-05	0.402127	2.49e-05	1	1
Ciclev10000915m.g	AT1G11870.2	Seryl-tRNA synthetase	scaffold_5:36101457-36105593	9.64059	8.12555	1.18645	0.651625	1
Ciclev10000917m.g	AT5G12890.1	UDP-Glycosyltransferase superfamily protein	scaffold_5:17461566-17463320	0.312663	0.0502312	6.22448	1	1
Ciclev10000918m.g	AT4G37370.1	cytochrome P450, family 81, subfamily D, polypeptide 8	scaffold_5:34345967-34347847	9.1439	6.29945	1.45154	0.342342	1
Ciclev10000919m.g	AT4G38470.1	ACT-like protein tyrosine kinase family protein	scaffold_5:42339174-42344676	16.1928	9.76745	1.65783	0.121906	0.86104
Ciclev10000921m.g	AT2G30490.1	cinnamate-4-hydroxylase	scaffold_5:15445700-15450041	76.8216	33.7047	2.27925	2.2e-06	9.23e-05
Ciclev10000923m.g	AT1G31910.1	GHMP kinase family protein	scaffold_5:26496114-26502834	7.15144	8.14518	0.877997	1	1
Ciclev10000924m.g	AT4G31500.1	cytochrome P450, family 83, subfamily B, polypeptide 1	scaffold_5:41680810-41682843	29.8033	34.8626	0.854879	1	1
Ciclev10000925m.g	AT1G22360.1	UDP-glucosyl transferase 85A2	scaffold_5:36251748-36253427	5.49517	6.52199	0.84256	1	1
Ciclev10000926m.g	AT4G37370.1	cytochrome P450, family 81, subfamily D, polypeptide 8	scaffold_5:34382123-34384067	0.221582	0.752797	0.294345	1	1
Ciclev10000927m.g	AT1G44110.1	Cyclin A1;1	scaffold_5:37664655-37668864	0.0635772	0.36011	0.176549	1	1
Ciclev10000928m.g	AT3G02100.1	UDP-Glycosyltransferase superfamily protein	scaffold_5:25850492-25852629	19.4836	8.84711	2.20226	0.0239494	0.29592
Ciclev10000930m.g	AT2G44020.1	Mitochondrial transcription termination factor family protein	scaffold_5:39613356-39615571	2.94577	5.13254	0.57394	0.515508	1
Ciclev10000931m.g	AT1G35670.1	calcium-dependent protein kinase 2	scaffold_5:39415803-39419710	26.9292	35.1482	0.766162	0.61394	1
Ciclev10000932m.g	AT1G77360.1	Tetratricopeptide repeat (TPR)-like superfamily protein	scaffold_5:29189913-29191722	1.05913	3.85232	0.274933	0.691172	1
Ciclev10000934m.g	AT4G37370.1	cytochrome P450, family 81, subfamily D, polypeptide 8	scaffold_5:34373193-34375442	0.145902	1e-05	14590.2	1	1
Ciclev10000935m.g	AT2G01860.1	Tetratricopeptide repeat (TPR)-like superfamily protein	scaffold_5:42792299-42794134	8.5376	8.627	0.989637	0.817333	1
Ciclev10000938m.g	AT4G08310.1		scaffold_5:37261673-37266754	29.2189	24.6262	1.1865	0.280781	1
Ciclev10000939m.g	AT1G47840.1	hexokinase 3	scaffold_5:41895512-41898880	0.360787	0.326507	1.10499	1	1
Ciclev10000940m.g	AT4G08250.1	GRAS family transcription factor	scaffold_5:37180883-37182577	0.619326	1e-05	61932.6	1	1
Ciclev10000941m.g	AT1G09960.1	sucrose transporter 4	scaffold_5:35065342-35070910	15.3016	12.7286	1.20214	0.457469	1
Ciclev10000944m.g	AT3G02100.1	UDP-Glycosyltransferase superfamily protein	scaffold_5:25842992-25846200	6.02478	3.12913	1.92539	0.367264	1
Ciclev10000945m.g	AT4G24330.1	Protein of unknown function (DUF1682)	scaffold_5:6040244-6045626	20.1553	32.7289	0.615826	0.276013	1
Ciclev10000946m.g	AT1G12220.1	Disease resistance protein (CC-NBS-LRR class) family	scaffold_5:32375291-32377628	0.542087	0.913542	0.59339	1	1
Ciclev10000947m.g	AT1G47530.1	MATE efflux family protein	scaffold_5:40691800-40694522	21.8295	23.9441	0.911686	1	1
Ciclev10000948m.g	AT4G35090.1	catalase 2	scaffold_5:42695342-42700919	1247.27	718.873	1.73504	2.44e-49	1.29e-46
Ciclev10000949m.g	AT1G44170.1	aldehyde dehydrogenase 3H1	scaffold_5:37529107-37534944	43.469	38.3357	1.1339	0.272955	1
Ciclev10000950m.g	AT5G65380.1	MATE efflux family protein	scaffold_5:35948623-35951377	4.18977	3.15165	1.32939	0.742562	1
Ciclev10000951m.g	AT4G35090.1	catalase 2	scaffold_5:42704437-42709207	155.926	95.4254	1.63401	1.88e-06	8e-05
Ciclev10000952m.g	AT1G76710.1	SET domain group 26	scaffold_5:38941434-38946007	4.41284	3.86538	1.14163	0.742562	1
Ciclev10000954m.g	AT2G01170.1	bidirectional amino acid transporter 1	scaffold_5:37749886-37752104	0.0750824	1e-05	7508.24	1	1
Ciclev10000955m.g	AT1G56350.1	Peptide chain release factor 2	scaffold_5:33992641-33995456	4.301	3.38667	1.26998	0.742562	1
Ciclev10000958m.g	AT1G22360.1	UDP-glucosyl transferase 85A2	scaffold_5:36267512-36270615	31.2836	121.072	0.258388	2.2e-11	1.85e-09
Ciclev10000960m.g	AT3G05165.4	Major facilitator superfamily protein	scaffold_5:31925317-31931330	65.0627	65.5843	0.992047	0.486232	1
Ciclev10000961m.g	AT1G31830.1	Amino acid permease family protein	scaffold_5:28792154-28794473	2.22213	1.27523	1.74253	0.670509	1
Ciclev10000962m.g	AT5G63910.1	farnesylcysteine lyase	scaffold_5:16114443-16118985	38.9617	31.1261	1.25174	0.191324	1
Ciclev10000963m.g	AT5G09300.1	Thiamin diphosphate-binding fold (THDP-binding) superfamily protein	scaffold_5:17163767-17168691	44.3497	43.4694	1.02025	0.524484	1
Ciclev10000964m.g	AT1G44350.1	IAA-leucine resistant (ILR)-like gene 6	scaffold_5:37473063-37478070	34.3654	34.0322	1.00979	0.632956	1
Ciclev10000965m.g	AT5G51340.1	Tetratricopeptide repeat (TPR)-like superfamily protein	scaffold_5:14944935-14948573	14.7293	15.1718	0.970834	0.859748	1
Ciclev10000967m.g	AT4G37330.1	cytochrome P450, family 81, subfamily D, polypeptide 4	scaffold_5:39791663-39793900	6.93975	1.1976	5.79471	0.092858	0.738187
Ciclev10000968m.g	AT3G63470.1	serine carboxypeptidase-like 40	scaffold_5:40400643-40405657	30.535	26.1537	1.16752	0.357586	1
Ciclev10000970m.g	AT1G19860.1	Zinc finger C-x8-C-x5-C-x3-H type family protein	scaffold_5:41703786-41708779	50.6146	54.3785	0.930783	0.845843	1
Ciclev10000975m.g	AT5G24750.1	UDP-Glycosyltransferase superfamily protein	scaffold_5:12122622-12130994	2.957	3.09169	0.956435	1	1
Ciclev10000976m.g	AT2G33860.1	Transcriptional factor B3 family protein / auxin-responsive factor AUX/IAA-related	scaffold_5:6070992-6076799	0.32286	1e-05	32286	1	1
Ciclev10000978m.g	AT1G09300.1	Metallopeptidase M24 family protein	scaffold_5:34211378-34217253	24.6136	28.0952	0.876078	1	1
Ciclev10000979m.g	AT3G28670.1	oxidoreductase, zinc-binding dehydrogenase family protein	scaffold_5:35217312-35224160	11.5913	18.1164	0.639824	0.376007	1
Ciclev10000980m.g	AT5G27350.1	Major facilitator superfamily protein	scaffold_5:31939509-31943860	20.6124	22.1548	0.930381	1	1
Ciclev10000981m.g	AT5G49630.1	amino acid permease 6	scaffold_5:34994036-35002166	12.3844	9.35022	1.3245	0.406509	1
Ciclev10000982m.g	AT3G50700.1	indeterminate(ID)-domain 2	scaffold_5:33217334-33221682	7.47086	4.1393	1.80486	0.405966	1
Ciclev10000983m.g	AT5G04980.2	DNAse I-like superfamily protein	scaffold_5:24066569-24070257	0.897157	1.07447	0.834976	1	1
Ciclev10000984m.g	AT1G09020.1	homolog of yeast sucrose nonfermenting 4	scaffold_5:33028396-33034775	38.164	41.0135	0.930523	0.824746	1
Ciclev10000985m.g	AT1G47330.1	CBS domain-containing protein with a domain of unknown function (DUF21)	scaffold_5:41028042-41032953	14.146	18.8449	0.750654	0.863969	1
Ciclev10000988m.g	AT3G18970.1	mitochondrial editing factor 20	scaffold_5:29467470-29469049	2.03653	1.50197	1.35591	0.670509	1
Ciclev10000990m.g	AT1G77360.1	Tetratricopeptide repeat (TPR)-like superfamily protein	scaffold_5:37710021-37713327	7.02378	5.30428	1.32417	0.594063	1
Ciclev10000991m.g	AT1G77380.1	amino acid permease 3	scaffold_5:37687806-37690745	79.5708	39.1224	2.03389	1.41e-05	0.000497928
Ciclev10000992m.g	AT1G76660.1		scaffold_5:43215116-43218585	1.73718	1.91706	0.906169	1	1
Ciclev10000996m.g	AT1G31830.1	Amino acid permease family protein	scaffold_5:28289811-28291569	3.01047	1.9318	1.55838	0.428556	1
Ciclev10000997m.g	AT1G34270.1	Exostosin family protein	scaffold_5:39589972-39592011	11.3301	13.2788	0.853247	1	1
Ciclev10000998m.g	AT5G42240.1	serine carboxypeptidase-like 42	scaffold_5:38363304-38367051	31.7513	50.4138	0.629814	0.152465	0.987117
Ciclev10001000m.g	AT5G58380.1	SOS3-interacting protein 1	scaffold_5:13183492-13185654	8.14734	15.8116	0.515276	0.319996	1
Ciclev10001001m.g	AT4G08540.1	DNA-directed RNA polymerase II protein	scaffold_5:36807244-36812356	13.5888	15.1874	0.894742	1	1
Ciclev10001002m.g	AT2G33630.1	NAD(P)-binding Rossmann-fold superfamily protein	scaffold_5:42974881-42977561	12.1833	13.6514	0.892458	1	1
Ciclev10001005m.g	AT1G16570.1	UDP-Glycosyltransferase superfamily protein	scaffold_5:30736530-30740889	7.08107	5.55542	1.27462	0.594063	1
Ciclev10001007m.g	AT1G19920.1	Pseudouridine synthase/archaeosine transglycosylase-like family protein	scaffold_5:41787407-41790854	4.48402	4.1815	1.07235	1	1
Ciclev10001008m.g	AT1G28210.1	DNAJ heat shock family protein	scaffold_5:35917383-35925361	10.8186	9.64106	1.12214	0.665816	1
Ciclev10001011m.g	AT3G19770.1	Vacuolar sorting protein 9 (VPS9) domain	scaffold_5:36883102-36887975	5.60701	4.95218	1.13223	0.764943	1
Ciclev10001013m.g	AT4G01070.1	UDP-Glycosyltransferase superfamily protein	scaffold_5:33480565-33482350	0.0843015	1e-05	8430.15	1	1
Ciclev10001014m.g	AT3G54470.1	uridine 5\'-monophosphate synthase / UMP synthase (PYRE-F) (UMPS)	scaffold_5:787433-791617	51.6421	53.3246	0.968448	0.697364	1
Ciclev10001015m.g	AT1G19270.1	DA1	scaffold_5:40713634-40719124	12.2521	41.0456	0.2985	0.000596192	0.014161
Ciclev10001016m.g	AT5G26310.1	UDP-Glycosyltransferase superfamily protein	scaffold_5:40841687-40843369	3.52114	3.48499	1.01037	1	1
Ciclev10001017m.g	AT5G66730.1	C2H2-like zinc finger protein	scaffold_5:40892737-40895876	7.80597	4.23825	1.84179	0.405966	1
Ciclev10001020m.g	AT5G20710.1	beta-galactosidase 7	scaffold_5:24748815-24753902	0.0503931	0.0808836	0.623032	1	1
Ciclev10001021m.g	AT1G54990.1	alpha/beta-Hydrolases superfamily protein	scaffold_5:32967396-32970116	11.2958	7.76573	1.45457	0.268133	1
Ciclev10001022m.g	AT5G46410.2	SCP1-like small phosphatase 4	scaffold_5:24019099-24024516	15.6066	12.8404	1.21543	0.457469	1
Ciclev10001023m.g	AT1G22040.1	Galactose oxidase/kelch repeat superfamily protein	scaffold_5:36743352-36746199	21.3076	30.7132	0.69376	0.49229	1
Ciclev10001024m.g	AT5G36110.1	cytochrome P450, family 716, subfamily A, polypeptide 1	scaffold_5:17615994-17618419	0.490976	0.327531	1.49902	1	1
Ciclev10001026m.g	AT1G22040.1	Galactose oxidase/kelch repeat superfamily protein	scaffold_5:22571031-22573220	5.68191	7.48067	0.759546	0.796225	1
Ciclev10001029m.g	AT3G48090.1	alpha/beta-Hydrolases superfamily protein	scaffold_5:1102933-1104649	0.740618	0.434122	1.70601	1	1
Ciclev10001030m.g	AT1G21400.1	Thiamin diphosphate-binding fold (THDP-binding) superfamily protein	scaffold_5:38090538-38095612	13.3811	8.18724	1.63438	0.211851	1
Ciclev10001031m.g	AT1G75420.1	UDP-Glycosyltransferase superfamily protein	scaffold_5:41356898-41361583	7.5402	6.12789	1.23047	0.796981	1
Ciclev10001032m.g	AT1G54730.2	Major facilitator superfamily protein	scaffold_5:31919716-31923369	18.6877	16.57	1.1278	0.507478	1
Ciclev10001035m.g	AT1G21900.1	emp24/gp25L/p24 family/GOLD family protein	scaffold_5:37235123-37239661	12.5411	9.57734	1.30946	0.406509	1
Ciclev10001037m.g	AT2G41705.1	camphor resistance CrcB family protein	scaffold_5:37117935-37123920	22.4152	35.9904	0.622811	0.242284	1
Ciclev10001042m.g	AT3G19540.1	Protein of unknown function (DUF620)	scaffold_5:34414460-34417249	1.47782	0.557341	2.65155	0.60305	1
Ciclev10001043m.g	AT3G19270.1	cytochrome P450, family 707, subfamily A, polypeptide 4	scaffold_5:40180739-40184016	14.4358	6.9219	2.08553	0.0542575	0.527273
Ciclev10001045m.g	AT5G27730.1	Protein of unknown function (DUF1624)	scaffold_5:33343273-33347744	39.1278	35.8474	1.09151	0.358027	1
Ciclev10001046m.g	AT4G01880.1	methyltransferases	scaffold_5:39086782-39089703	28.8835	28.4223	1.01623	0.693646	1
Ciclev10001047m.g	AT1G32200.1	phospholipid/glycerol acyltransferase family protein	scaffold_5:26935356-26947618	30.2762	33.7878	0.896069	0.901772	1
Ciclev10001048m.g	AT4G06536.1	SPla/RYanodine receptor (SPRY) domain-containing protein	scaffold_5:39963242-39965562	13.5096	20.5432	0.657619	0.499067	1
Ciclev10001050m.g	AT1G12680.1	phosphoenolpyruvate carboxylase-related kinase 2	scaffold_5:35898988-35902917	10.3587	19.1066	0.542153	0.214053	1
Ciclev10001051m.g	AT5G28770.2	bZIP transcription factor family protein	scaffold_5:29469172-29473572	23.8027	15.5593	1.52981	0.113034	0.824559
Ciclev10001054m.g	AT1G47128.1	Granulin repeat cysteine protease family protein	scaffold_5:39909445-39913557	701.987	428.173	1.63949	1.27e-24	2.85e-22
Ciclev10001055m.g	AT5G09640.1	serine carboxypeptidase-like 19	scaffold_5:34739063-34742983	45.5847	45.1243	1.0102	0.601737	1
Ciclev10001056m.g	AT1G31360.1	RECQ helicase L2	scaffold_5:27805276-27812705	4.79121	4.98548	0.961033	1	1
Ciclev10001057m.g	AT5G49970.1	pyridoxin (pyrodoxamine) 5\'-phosphate oxidase	scaffold_5:35886980-35892772	0.129662	0.155747	0.832517	1	1
Ciclev10001058m.g	AT4G38900.2	Basic-leucine zipper (bZIP) transcription factor family protein	scaffold_5:41662679-41665662	16.7434	27.1399	0.616929	0.235552	1
Ciclev10001059m.g	AT5G09640.1	serine carboxypeptidase-like 19	scaffold_5:34732987-34736843	0.403173	1.04829	0.384601	1	1
Ciclev10001060m.g	AT5G09640.1	serine carboxypeptidase-like 19	scaffold_5:34751053-34754900	14.8916	14.9492	0.996147	0.855253	1
Ciclev10001062m.g	AT1G32230.3	WWE protein-protein interaction domain protein family	scaffold_5:27004513-27012050	138.628	176.788	0.784148	0.310808	1
Ciclev10001063m.g	AT4G33280.1	AP2/B3-like transcriptional factor family protein	scaffold_5:40554895-40558064	2.15576	1.57903	1.36524	0.670509	1
Ciclev10001065m.g	AT3G11340.1	UDP-Glycosyltransferase superfamily protein	scaffold_5:29825418-29827587	29.8161	40.7366	0.731924	0.476588	1
Ciclev10001068m.g	AT4G24510.1	HXXXD-type acyl-transferase family protein	scaffold_5:35538653-35541459	0.846483	0.577325	1.46622	1	1
Ciclev10001069m.g	AT2G33610.1	switch subunit 3	scaffold_5:42985832-42990116	28.8281	29.3958	0.980688	0.794535	1
Ciclev10001070m.g	AT5G42930.1	alpha/beta-Hydrolases superfamily protein	scaffold_5:40109326-40112318	1.05913	1.80912	0.585439	1	1
Ciclev10001071m.g	AT3G02100.1	UDP-Glycosyltransferase superfamily protein	scaffold_5:25834125-25835646	4.01671	1.07652	3.7312	0.264191	1
Ciclev10001072m.g	AT1G77690.1	like AUX1 3	scaffold_5:37105295-37107915	0.355204	0.340935	1.04185	1	1
Ciclev10001073m.g	AT1G72100.1	late embryogenesis abundant domain-containing protein / LEA domain-containing protein	scaffold_5:39764172-39765843	0.0560878	1e-05	5608.78	1	1
Ciclev10001075m.g	AT1G16870.1	mitochondrial 28S ribosomal protein S29-related	scaffold_5:12779470-12783622	17.2799	15.7089	1.10001	0.496607	1
Ciclev10001076m.g	AT3G45100.1	UDP-Glycosyltransferase superfamily protein	scaffold_5:11696379-11701383	6.89449	5.41317	1.27365	0.782591	1
Ciclev10001077m.g	AT5G60930.1	P-loop containing nucleoside triphosphate hydrolases superfamily protein	scaffold_5:35578104-35582361	0.563264	0.112899	4.9891	1	1
Ciclev10001078m.g	AT1G35470.2	SPla/RYanodine receptor (SPRY) domain-containing protein	scaffold_5:39665684-39672167	22.3941	22.9662	0.975089	0.768021	1
Ciclev10001079m.g	AT5G22130.1	mannosyltransferase family protein	scaffold_5:21076262-21079526	13.4139	16.8207	0.797464	1	1
Ciclev10001081m.g	AT3G12250.1	TGACG motif-binding factor 6	scaffold_5:21379383-21388939	36.4737	48.6705	0.749401	0.517517	1
Ciclev10001082m.g	AT3G26040.1	HXXXD-type acyl-transferase family protein	scaffold_5:17984020-17985454	0.506471	0.274186	1.84718	1	1
Ciclev10001084m.g	AT1G34430.1	2-oxoacid dehydrogenases acyltransferase family protein	scaffold_5:39477781-39484776	29.006	18.8788	1.53643	0.0459507	0.46768
Ciclev10001085m.g	AT2G13810.1	AGD2-like defense response protein 1	scaffold_5:36770515-36774625	1e-05	0.204229	4.9e-05	1	1
Ciclev10001086m.g	AT3G26040.1	HXXXD-type acyl-transferase family protein	scaffold_5:18104382-18105975	0.717124	3.01098	0.23817	0.379905	1
Ciclev10001087m.g	AT1G31830.1	Amino acid permease family protein	scaffold_5:28418979-28420456	1.97961	1.91174	1.0355	1	1
Ciclev10001088m.g	AT1G54820.1	Protein kinase superfamily protein	scaffold_5:32624373-32632209	1e-05	0.110504	9.05e-05	1	1
Ciclev10001089m.g	AT3G26040.1	HXXXD-type acyl-transferase family protein	scaffold_5:11931811-11933520	0.142392	1e-05	14239.2	1	1
Ciclev10001093m.g	AT5G64440.1	fatty acid amide hydrolase	scaffold_5:15605851-15610028	27.0054	28.1397	0.95969	0.79119	1
Ciclev10001095m.g	AT3G02100.1	UDP-Glycosyltransferase superfamily protein	scaffold_5:25856737-25859047	4.46775	2.43374	1.83575	0.486694	1
Ciclev10001096m.g	AT1G77660.1	Histone H3 K4-specific methyltransferase SET7/9 family protein	scaffold_5:37199634-37201893	5.87206	3.33694	1.75971	0.530721	1
Ciclev10001099m.g	AT1G76510.1	ARID/BRIGHT DNA-binding domain-containing protein	scaffold_5:43036918-43044008	24.2556	38.4695	0.630515	0.259479	1
Ciclev10001100m.g	AT1G76990.1	ACT domain repeat 3	scaffold_5:38108660-38114412	46.9199	55.6309	0.843414	0.843789	1
Ciclev10001103m.g	AT3G30390.1	Transmembrane amino acid transporter family protein	scaffold_5:34826870-34830732	4.3319	14.1706	0.305696	0.0708065	0.624808
Ciclev10001104m.g	AT1G21480.2	Exostosin family protein	scaffold_5:38278462-38282008	7.29571	3.94203	1.85075	0.247291	1
Ciclev10001105m.g	AT2G17900.1	SET domain group 37	scaffold_5:37066207-37070717	4.08817	3.85586	1.06025	0.742562	1
Ciclev10001106m.g	AT3G26040.1	HXXXD-type acyl-transferase family protein	scaffold_5:42634963-42636368	3.56955	4.75732	0.750328	1	1
Ciclev10001108m.g	AT3G05510.1	Phospholipid/glycerol acyltransferase family protein	scaffold_5:33334756-33337976	8.96342	11.0453	0.811514	0.828169	1
Ciclev10001110m.g			scaffold_5:185640-188056	5.25427	5.40956	0.971293	1	1
Ciclev10001111m.g	AT3G26040.1	HXXXD-type acyl-transferase family protein	scaffold_5:17947452-17948817	1.29116	0.481343	2.68241	0.60305	1
Ciclev10001114m.g	AT1G42970.1	glyceraldehyde-3-phosphate dehydrogenase B subunit	scaffold_5:42875802-42879044	344.624	441.067	0.781342	0.0930768	0.738127
Ciclev10001115m.g	AT4G33490.2	Eukaryotic aspartyl protease family protein	scaffold_5:15776475-15781159	15.8272	14.5118	1.09064	0.595875	1
Ciclev10001116m.g	AT1G75430.1	BEL1-like homeodomain 11	scaffold_5:41382907-41385972	0.838273	0.638857	1.31214	1	1
Ciclev10001117m.g	AT3G42170.1	BED zinc finger ;hAT family dimerisation domain	scaffold_5:30586283-30587715	0.572872	0.989767	0.578795	1	1
Ciclev10001118m.g	AT4G31940.1	cytochrome P450, family 82, subfamily C, polypeptide 4	scaffold_5:26715484-26717938	105.605	137.019	0.770733	0.304802	1
Ciclev10001119m.g	AT2G45730.1	eukaryotic initiation factor 3 gamma subunit family protein	scaffold_5:41871238-41875409	15.7951	18.3853	0.859116	1	1
Ciclev10001120m.g	AT1G78070.1	Transducin/WD40 repeat-like superfamily protein	scaffold_5:36564476-36569792	93.7973	109.925	0.853285	0.833656	1
Ciclev10001121m.g	AT1G75400.1	RING/U-box superfamily protein	scaffold_5:41337992-41344179	23.6439	26.6097	0.888544	1	1
Ciclev10001122m.g	AT4G33490.2	Eukaryotic aspartyl protease family protein	scaffold_5:15762363-15766976	31.3471	17.4102	1.8005	0.016049	0.217228
Ciclev10001124m.g	AT4G24550.2	Clathrin adaptor complexes medium subunit family protein	scaffold_5:35664486-35669446	40.9124	59.9936	0.681946	0.231665	1
Ciclev10001126m.g	AT3G49180.1	Transducin/WD40 repeat-like superfamily protein	scaffold_5:40081126-40086638	11.9144	12.9859	0.917487	1	1
Ciclev10001128m.g	AT3G05480.1	cell cycle checkpoint control protein family	scaffold_5:33307926-33311996	3.29889	2.37636	1.38821	0.712829	1
Ciclev10001130m.g	AT4G29680.1	Alkaline-phosphatase-like family protein	scaffold_5:2455680-2457243	14.8322	31.0233	0.478099	0.0414332	0.437868
Ciclev10001131m.g	AT4G29250.1	HXXXD-type acyl-transferase family protein	scaffold_5:29666996-29670123	0.741273	0.538868	1.37561	1	1
Ciclev10001133m.g	AT5G64610.1	histone acetyltransferase of the MYST family 1	scaffold_5:36894364-36899326	34.2359	36.8685	0.928595	0.813725	1
Ciclev10001136m.g	AT5G63860.1	Regulator of chromosome condensation (RCC1) family protein	scaffold_5:15966065-15975610	22.9423	29.7064	0.772302	0.680494	1
Ciclev10001138m.g	AT2G33710.2	Integrase-type DNA-binding superfamily protein	scaffold_5:38906625-38908821	3.40179	9.0906	0.37421	0.19153	1
Ciclev10001139m.g	AT1G34340.1	alpha/beta-Hydrolases superfamily protein	scaffold_5:39518143-39523027	1.96891	2.59594	0.758457	1	1
Ciclev10001140m.g	AT1G75780.1	tubulin beta-1 chain	scaffold_5:41945345-41948270	32.5756	39.3421	0.828009	0.815262	1
Ciclev10001142m.g	AT1G21200.1	sequence-specific DNA binding transcription factors	scaffold_5:38644147-38646386	20.4375	14.3885	1.42041	0.183893	1
Ciclev10001143m.g	AT5G27470.1	seryl-tRNA synthetase / serine--tRNA ligase	scaffold_5:32780338-32783349	38.3626	56.325	0.681094	0.26051	1
Ciclev10001144m.g	AT1G35620.1	PDI-like 5-2	scaffold_5:39362177-39365948	24.5316	30.9044	0.79379	0.789745	1
Ciclev10001145m.g	AT4G01950.1	glycerol-3-phosphate acyltransferase 3	scaffold_5:36785809-36787450	1.8458	0.433328	4.25959	0.60305	1
Ciclev10001146m.g	AT4G33430.2	BRI1-associated receptor kinase	scaffold_5:22336224-22340033	131.592	160.152	0.821669	0.558458	1
Ciclev10001147m.g	AT4G24400.1	CBL-interacting protein kinase 8	scaffold_5:35232080-35237039	18.3866	28.8971	0.636278	0.385761	1
Ciclev10001148m.g	AT1G43190.1	polypyrimidine tract-binding protein 3	scaffold_5:38869665-38875564	32.7293	32.5471	1.0056	0.62379	1
Ciclev10001149m.g	AT1G27480.1	alpha/beta-Hydrolases superfamily protein	scaffold_5:34773463-34775206	3.56527	1.09108	3.26765	0.428556	1
Ciclev10001152m.g	AT1G27840.1	Transducin/WD40 repeat-like superfamily protein	scaffold_5:40219020-40224336	14.8625	13.1688	1.12861	0.710578	1
Ciclev10001154m.g	AT3G58970.1	magnesium transporter 6	scaffold_5:6749023-6753178	11.3611	20.0501	0.566636	0.29531	1
Ciclev10001155m.g	AT2G26490.1	Transducin/WD40 repeat-like superfamily protein	scaffold_5:40597271-40598741	1e-05	0.128841	7.76e-05	1	1
Ciclev10001159m.g	AT1G45249.1	abscisic acid responsive elements-binding factor 2	scaffold_5:40139284-40142825	38.0527	30.9656	1.22887	0.151176	0.980387
Ciclev10001160m.g	AT3G26040.1	HXXXD-type acyl-transferase family protein	scaffold_5:8910946-8912566	34.1286	82.2218	0.41508	0.000196314	0.00532907
Ciclev10001161m.g	AT1G71980.1	Protease-associated (PA) RING/U-box zinc finger family protein	scaffold_5:39367032-39370754	58.85	50.2081	1.17212	0.180793	1
Ciclev10001163m.g	AT1G77840.1	Translation initiation factor IF2/IF5	scaffold_5:36869386-36872829	47.8673	92.5094	0.517432	0.00230758	0.0458053
Ciclev10001165m.g	AT1G47870.1	winged-helix DNA-binding transcription factor family protein	scaffold_5:41865373-41869493	1.85339	1.38147	1.34161	1	1
Ciclev10001166m.g	AT2G16980.2	Major facilitator superfamily protein	scaffold_5:42314433-42319779	6.13653	7.08763	0.865808	1	1
Ciclev10001167m.g	AT5G27660.1	Trypsin family protein with PDZ domain	scaffold_5:33252170-33255796	2.42373	3.08506	0.785635	1	1
Ciclev10001170m.g	AT1G22100.1	Inositol-pentakisphosphate 2-kinase family protein	scaffold_5:41242935-41246768	6.17874	6.40187	0.965146	1	1
Ciclev10001173m.g	AT1G48880.1	TRICHOME BIREFRINGENCE-LIKE 7	scaffold_5:18398112-18402314	2.36708	4.12594	0.573707	0.730838	1
Ciclev10001174m.g	AT3G12350.1	F-box family protein	scaffold_5:34674636-34676788	9.20005	10.2889	0.894172	1	1
Ciclev10001177m.g	AT1G76360.1	Protein kinase superfamily protein	scaffold_5:42755250-42758065	1.92362	1.94477	0.989125	1	1
Ciclev10001178m.g	AT1G09850.1	xylem bark cysteine peptidase 3	scaffold_5:41443666-41446709	19.9218	13.5961	1.46526	0.172786	1
Ciclev10001179m.g	AT5G25900.1	GA requiring 3	scaffold_5:4550038-4553132	3.71556	1.73177	2.14553	0.428556	1
Ciclev10001180m.g	AT1G31360.1	RECQ helicase L2	scaffold_5:13903638-13915539	2.4862	1.84676	1.34625	0.670509	1
Ciclev10001181m.g	AT1G27760.3	interferon-related developmental regulator family protein / IFRD protein family	scaffold_5:34586509-34591686	29.0935	36.0464	0.807112	0.806911	1
Ciclev10001182m.g	AT1G76250.1		scaffold_5:42582877-42585184	8.18681	8.20735	0.997497	0.817333	1
Ciclev10001183m.g	AT1G31830.1	Amino acid permease family protein	scaffold_5:28738203-28740972	0.0636541	0.0507227	1.25494	1	1
Ciclev10001184m.g	AT4G33470.1	histone deacetylase 14	scaffold_5:17122443-17129244	31.2042	33.1945	0.940041	0.806303	1
Ciclev10001185m.g	AT5G62030.1	diphthamide synthesis DPH2 family protein	scaffold_5:22686599-22688174	15.1496	25.8831	0.585309	0.281572	1
Ciclev10001186m.g	AT5G64090.1		scaffold_5:13036882-13040255	5.52625	3.31558	1.66675	0.530721	1
Ciclev10001187m.g	AT1G60420.1	DC1 domain-containing protein	scaffold_5:42265152-42269676	8.40401	8.50771	0.987811	0.817333	1
Ciclev10001190m.g	AT1G34150.1	Pseudouridine synthase family protein	scaffold_5:39194419-39200052	3.6517	2.0739	1.76079	0.712829	1
Ciclev10001191m.g	AT2G30360.1	SOS3-interacting protein 4	scaffold_5:13273930-13275652	57.3197	106.183	0.53982	0.00292226	0.0554211
Ciclev10001192m.g	AT5G42690.1	Protein of unknown function, DUF547	scaffold_5:40417768-40420771	6.24449	6.33112	0.986317	1	1
Ciclev10001194m.g	AT1G77490.1	thylakoidal ascorbate peroxidase	scaffold_5:37517042-37521275	82.4834	97.1392	0.849126	0.823347	1
Ciclev10001195m.g	AT1G69740.1	Aldolase superfamily protein	scaffold_5:37478178-37482337	42.874	42.1548	1.01706	0.589936	1
Ciclev10001196m.g	AT5G64970.1	Mitochondrial substrate carrier family protein	scaffold_5:36409789-36413418	4.17237	5.05187	0.825906	1	1
Ciclev10001198m.g	AT1G78560.1	Sodium Bile acid symporter family	scaffold_5:5972891-5976639	14.6044	16.4787	0.886259	1	1
Ciclev10001200m.g	AT5G09330.1	NAC domain containing protein 82	scaffold_5:18169661-18173979	64.9967	74.487	0.872591	0.93272	1
Ciclev10001202m.g	AT1G77670.1	Pyridoxal phosphate (PLP)-dependent transferases superfamily protein	scaffold_5:37189652-37192231	95.5515	140.37	0.680712	0.0509712	0.504097
Ciclev10001203m.g	AT5G63970.1	Copine (Calcium-dependent phospholipid-binding protein) family	scaffold_5:16526796-16532892	26.8456	38.7493	0.692802	0.388218	1
Ciclev10001207m.g	AT5G64020.1	TRICHOME BIREFRINGENCE-LIKE 14	scaffold_5:16649434-16653004	0.576842	0.68942	0.836706	1	1
Ciclev10001211m.g	AT4G08320.1	Tetratricopeptide repeat (TPR)-like superfamily protein	scaffold_5:37344548-37349705	20.9734	18.5249	1.13217	0.527775	1
Ciclev10001212m.g	AT5G07030.1	Eukaryotic aspartyl protease family protein	scaffold_5:21522432-21525218	0.330112	0.533297	0.619002	1	1
Ciclev10001213m.g	AT1G08980.1	amidase 1	scaffold_5:32755163-32758320	9.19023	8.53584	1.07666	0.651625	1
Ciclev10001214m.g	AT1G47490.2	RNA-binding protein 47C	scaffold_5:40383849-40388296	118.935	209.857	0.566743	0.000104276	0.00304156
Ciclev10001215m.g	AT1G08820.1	vamp/synaptobrevin-associated protein 27-2	scaffold_5:31084374-31089683	18.7521	22.311	0.840487	0.878062	1
Ciclev10001219m.g	AT5G39960.1	GTP binding;GTP binding	scaffold_5:371943-377068	17.6579	13.5159	1.30645	0.294563	1
Ciclev10001220m.g	AT2G23390.1		scaffold_5:2039384-2044991	37.1416	37.4213	0.992526	0.646048	1
Ciclev10001223m.g	AT1G13570.1	F-box/RNI-like superfamily protein	scaffold_5:40702394-40706121	33.3808	33.7692	0.988498	0.628418	1
Ciclev10001224m.g	AT1G75710.1	C2H2-like zinc finger protein	scaffold_5:37077802-37079232	0.161366	1e-05	16136.6	1	1
Ciclev10001225m.g	AT4G31980.1		scaffold_5:25722021-25731001	2.2405	2.37242	0.944394	1	1
Ciclev10001227m.g	AT3G05545.1	RING/U-box superfamily protein	scaffold_5:33385403-33390936	56.7712	90.6291	0.626412	0.0477465	0.479967
Ciclev10001229m.g	AT3G05210.1	nucleotide repair protein, putative	scaffold_5:32546088-32549955	11.8673	15.2609	0.777628	0.708913	1
Ciclev10001231m.g	AT1G42430.1		scaffold_5:42595067-42600153	6.70417	6.94792	0.964918	1	1
Ciclev10001232m.g	AT1G47380.1	Protein phosphatase 2C family protein	scaffold_5:40268947-40273949	48.3568	198.236	0.243936	6.65e-19	1.12e-16
Ciclev10001235m.g	AT1G76310.1	CYCLIN B2;4	scaffold_5:42675741-42682366	0.207953	0.703494	0.2956	1	1
Ciclev10001239m.g	AT1G08980.1	amidase 1	scaffold_5:32737146-32740322	34.213	31.8898	1.07285	0.393647	1
Ciclev10001246m.g	AT1G43580.1	Sphingomyelin synthetase family protein	scaffold_5:38766602-38769204	7.91259	4.65574	1.69953	0.405966	1
Ciclev10001247m.g	AT1G10720.1	BSD domain-containing protein	scaffold_5:34778784-34781315	2.4502	9.38684	0.261025	0.100527	0.77218
Ciclev10001248m.g	AT1G09160.1	Protein phosphatase 2C family protein	scaffold_5:33825678-33829181	7.75494	11.3694	0.682089	0.656012	1
Ciclev10001249m.g	AT1G10120.1	basic helix-loop-helix (bHLH) DNA-binding superfamily protein	scaffold_5:34809344-34813138	3.10737	7.49837	0.414406	0.399018	1
Ciclev10001250m.g	AT1G35830.1	VQ motif-containing protein	scaffold_5:36490751-36492636	2.47927	2.39269	1.03619	1	1
Ciclev10001251m.g	AT1G76900.1	tubby like protein 1	scaffold_5:38695624-38699629	28.4488	27.5812	1.03146	0.596334	1
Ciclev10001254m.g	AT1G19360.1	Nucleotide-diphospho-sugar transferase family protein	scaffold_5:40869559-40872161	14.0077	21.0272	0.66617	0.511316	1
Ciclev10001255m.g	AT1G75710.1	C2H2-like zinc finger protein	scaffold_5:41881296-41883386	0.243084	0.197418	1.23132	1	1
Ciclev10001261m.g	AT1G25280.1	tubby like protein 10	scaffold_5:19027226-19031325	33.8625	55.4919	0.610224	0.0912364	0.728849
Ciclev10001262m.g	AT5G66460.1	Glycosyl hydrolase superfamily protein	scaffold_5:41201214-41208112	3.62977	4.37631	0.829413	1	1
Ciclev10001263m.g	AT5G27350.1	Major facilitator superfamily protein	scaffold_5:31933292-31936447	3.03741	3.41336	0.889859	1	1
Ciclev10001264m.g	AT1G10150.1	Carbohydrate-binding protein	scaffold_5:34784367-34786120	11.0138	17.3224	0.635813	0.471329	1
Ciclev10001266m.g	AT4G25000.1	alpha-amylase-like	scaffold_5:40192463-40194246	5.4318	4.65952	1.16574	0.764943	1
Ciclev10001267m.g	AT5G64430.1	Octicosapeptide/Phox/Bem1p family protein	scaffold_5:35225857-35227630	41.9704	49.2973	0.851373	0.835251	1
Ciclev10001268m.g	AT1G36320.1		scaffold_5:36798448-36801707	31.292	29.7725	1.05104	0.524948	1
Ciclev10001269m.g	AT3G05530.1	regulatory particle triple-A ATPase 5A	scaffold_5:33377661-33380733	21.4308	25.3696	0.844743	1	1
Ciclev10001270m.g	AT1G60990.1	Glycine cleavage T-protein family	scaffold_5:9214675-9219238	23.7338	19.4923	1.2176	0.365139	1
Ciclev10001272m.g	AT3G05530.1	regulatory particle triple-A ATPase 5A	scaffold_5:33351542-33354758	61.2659	63.2353	0.968856	0.655526	1
Ciclev10001273m.g	AT1G60680.1	NAD(P)-linked oxidoreductase superfamily protein	scaffold_5:29632952-29636062	29.0237	26.9704	1.07613	0.426677	1
Ciclev10001274m.g	AT5G10330.1	histidinol phosphate aminotransferase 1	scaffold_5:39459444-39464982	21.5121	24.4786	0.878813	1	1
Ciclev10001275m.g	AT1G47270.1	tubby like protein 6	scaffold_5:41140492-41143801	47.9723	51.5506	0.930587	0.841638	1
Ciclev10001277m.g	AT1G09840.1	shaggy-like protein kinase 41	scaffold_5:4607325-4613461	46.3285	21.3293	2.17206	0.000418346	0.0104973
Ciclev10001278m.g	AT1G71990.1	fucosyltransferase 13	scaffold_5:39349613-39352321	32.5966	43.3187	0.752483	0.495685	1
Ciclev10001283m.g	AT1G48880.1	TRICHOME BIREFRINGENCE-LIKE 7	scaffold_5:38352720-38355754	3.98188	3.52023	1.13114	1	1
Ciclev10001285m.g	AT5G50020.2	DHHC-type zinc finger family protein	scaffold_5:38930336-38936779	15.0987	17.39	0.86824	1	1
Ciclev10001288m.g	AT2G30530.1		scaffold_5:15023462-15026939	15.7419	19.3943	0.811677	0.867859	1
Ciclev10001289m.g	AT2G31290.1	Ubiquitin carboxyl-terminal hydrolase family protein	scaffold_5:38607425-38609135	7.62991	8.00821	0.952761	1	1
Ciclev10001290m.g	AT1G45976.1	S-ribonuclease binding protein 1	scaffold_5:40060072-40063681	9.61467	10.913	0.881029	1	1
Ciclev10001291m.g	AT1G27660.1	basic helix-loop-helix (bHLH) DNA-binding superfamily protein	scaffold_5:41275200-41278829	0.486453	0.396942	1.2255	1	1
Ciclev10001292m.g	AT1G32240.1	Homeodomain-like superfamily protein	scaffold_5:27065812-27070133	5.3505	1.7198	3.11112	0.158372	0.997633
Ciclev10001293m.g	AT1G10780.1	F-box/RNI-like superfamily protein	scaffold_5:9983418-9985631	0.645566	0.691659	0.933359	1	1
Ciclev10001295m.g	AT3G07300.1	NagB/RpiA/CoA transferase-like superfamily protein	scaffold_5:792246-800377	54.2397	57.9263	0.936357	0.707215	1
Ciclev10001297m.g	AT3G27230.1	S-adenosyl-L-methionine-dependent methyltransferases superfamily protein	scaffold_5:41719098-41720940	8.45908	2.80472	3.01602	0.0790235	0.669834
Ciclev10001298m.g	AT1G56340.2	calreticulin 1a	scaffold_5:33980142-33983575	108.901	106.976	1.01799	0.30662	1
Ciclev10001299m.g	AT4G21390.1	S-locus lectin protein kinase family protein	scaffold_5:30901446-30903844	13.3418	15.2865	0.872783	1	1
Ciclev10001303m.g	AT5G52010.1	C2H2-like zinc finger protein	scaffold_5:39967383-39969998	3.57465	2.76697	1.2919	0.712829	1
Ciclev10001304m.g	AT3G21110.1	purin 7	scaffold_5:35908180-35912917	19.612	23.8004	0.82402	0.881056	1
Ciclev10001305m.g	AT1G11320.1		scaffold_5:42183489-42186821	8.52314	8.1569	1.0449	0.817333	1
Ciclev10001308m.g	AT1G56600.1	galactinol synthase 2	scaffold_5:34257704-34260311	1.65785	1.70305	0.973459	1	1
Ciclev10001309m.g	AT1G56590.1	Clathrin adaptor complexes medium subunit family protein	scaffold_5:34239480-34244107	5.58077	5.66256	0.985556	1	1
Ciclev10001310m.g	AT1G21880.2	lysm domain GPI-anchored protein 1 precursor	scaffold_5:37275152-37277867	2.60539	1.20072	2.16986	0.670509	1
Ciclev10001314m.g	AT1G65930.1	cytosolic NADP+-dependent isocitrate dehydrogenase	scaffold_5:20894676-20899217	199.836	218.246	0.915646	0.732002	1
Ciclev10001315m.g	AT1G33270.2	Acyl transferase/acyl hydrolase/lysophospholipase superfamily protein	scaffold_5:11394533-11398432	13.1579	12.5749	1.04636	0.700842	1
Ciclev10001318m.g	AT1G09700.1	dsRNA-binding domain-like superfamily protein	scaffold_5:35521571-35526568	15.5275	21.8983	0.709073	0.627281	1
Ciclev10001322m.g	AT5G42760.1	Leucine carboxyl methyltransferase	scaffold_5:41035559-41037824	4.48007	3.19023	1.40431	0.742562	1
Ciclev10001325m.g	AT1G20925.1	Auxin efflux carrier family protein	scaffold_5:43048046-43051036	227.106	443.647	0.511907	1.33e-11	1.16e-09
Ciclev10001326m.g	AT5G07900.1	Mitochondrial transcription termination factor family protein	scaffold_5:29379202-29381494	2.92457	1.9252	1.5191	0.670509	1
Ciclev10001327m.g	AT1G21750.1	PDI-like 1-1	scaffold_5:37494368-37498693	76.7111	61.1109	1.25528	0.0502877	0.500118
Ciclev10001330m.g	AT1G21080.1	DNAJ heat shock N-terminal domain-containing protein	scaffold_5:43282463-43287999	86.6834	132.882	0.652334	0.0306141	0.351631
Ciclev10001331m.g	AT3G12400.1	Ubiquitin-conjugating enzyme/RWD-like protein	scaffold_5:20091692-20093357	13.3676	17.6106	0.759066	0.85978	1
Ciclev10001332m.g	AT2G26530.1	Protein of unknown function (DUF1645)	scaffold_5:40427855-40429578	353.239	94.8009	3.72611	1.18e-43	5.11e-41
Ciclev10001333m.g	AT2G35530.1	basic region/leucine zipper transcription factor 16	scaffold_5:26545479-26551827	18.7836	24.2898	0.773312	0.65338	1
Ciclev10001334m.g	AT4G24160.1	alpha/beta-Hydrolases superfamily protein	scaffold_5:41609583-41613450	46.7589	64.5982	0.723842	0.343777	1
Ciclev10001335m.g	AT5G07050.1	nodulin MtN21 /EamA-like transporter family protein	scaffold_5:20599440-20601673	4.93457	14.057	0.35104	0.0708065	0.624808
Ciclev10001336m.g	AT1G32190.1	alpha/beta-Hydrolases superfamily protein	scaffold_5:26913090-26919381	1.88401	2.34902	0.802041	1	1
Ciclev10001337m.g	AT2G26560.1	phospholipase A 2A	scaffold_5:40327363-40329591	566.249	365.34	1.54992	1.64e-17	2.5e-15
Ciclev10001338m.g	AT1G15200.1	protein-protein interaction regulator family protein	scaffold_5:19604826-19609695	41.5673	41.2904	1.00671	0.585904	1
Ciclev10001340m.g	AT1G10040.1	alpha/beta-Hydrolases superfamily protein	scaffold_5:34936852-34940733	27.814	65.7848	0.422803	0.000874684	0.0199294
Ciclev10001341m.g	AT1G72200.1	RING/U-box superfamily protein	scaffold_5:35989375-35991063	14.8398	17.0855	0.868561	1	1
Ciclev10001344m.g	AT1G32060.1	phosphoribulokinase	scaffold_5:25876760-25880898	155.728	127.632	1.22013	0.00735423	0.117884
Ciclev10001346m.g	AT2G02450.2	NAC domain containing protein 35	scaffold_5:347068-349282	12.7352	8.76462	1.45302	0.288946	1
Ciclev10001347m.g	AT4G18530.1	Protein of unknown function (DUF707)	scaffold_5:2077316-2081952	84.4436	156.814	0.538495	0.000232537	0.00621751
Ciclev10001348m.g	AT1G76130.1	alpha-amylase-like 2	scaffold_5:42390615-42395712	59.8825	77.7747	0.769948	0.443608	1
Ciclev10001352m.g	AT3G45900.1	Ribonuclease P protein subunit P38-related	scaffold_5:27585412-27589480	73.1871	30.2619	2.41846	1.15e-06	5.1e-05
Ciclev10001354m.g	AT2G13650.1	golgi nucleotide sugar transporter 1	scaffold_5:17881810-17890203	29.5289	27.7869	1.06269	0.511334	1
Ciclev10001355m.g	AT2G04940.1	scramblase-related	scaffold_5:39754437-39762057	9.38509	9.99057	0.939395	0.825402	1
Ciclev10001356m.g	AT5G09230.7	sirtuin 2	scaffold_5:16030839-16037006	11.3379	13.5108	0.839173	1	1
Ciclev10001357m.g	AT4G20020.1		scaffold_5:6777321-6783205	29.2403	21.6538	1.35035	0.127507	0.888735
Ciclev10001358m.g	AT1G20870.1	HSP20-like chaperones superfamily protein	scaffold_5:42968200-42970829	1e-05	0.0837437	0.000119412	1	1
Ciclev10001360m.g	AT1G19340.1	Methyltransferase MT-A70 family protein	scaffold_5:40827747-40830709	4.0879	4.48592	0.911273	1	1
Ciclev10001364m.g	AT1G77810.2	Galactosyltransferase family protein	scaffold_5:36878965-36882315	162.26	291.896	0.555883	2.4e-06	9.92e-05
Ciclev10001370m.g	AT4G24220.1	NAD(P)-binding Rossmann-fold superfamily protein	scaffold_5:34462922-34464693	32.6154	32.4561	1.00491	0.62379	1
Ciclev10001371m.g	AT4G19420.1	Pectinacetylesterase family protein	scaffold_5:29050806-29055948	61.7149	70.564	0.874595	1	1
Ciclev10001373m.g	AT5G13750.1	zinc induced facilitator-like 1	scaffold_5:19652838-19660511	13.745	41.8854	0.328157	0.00112308	0.0246977
Ciclev10001374m.g	AT4G24220.1	NAD(P)-binding Rossmann-fold superfamily protein	scaffold_5:30879493-30881250	17.5778	20.0616	0.876191	1	1
Ciclev10001376m.g	AT4G14770.1	TESMIN/TSO1-like CXC 2	scaffold_5:29867748-29870487	0.762958	0.708885	1.07628	1	1
Ciclev10001378m.g	AT5G28040.1	DNA-binding storekeeper protein-related transcriptional regulator	scaffold_5:30639422-30641265	25.9529	55.3289	0.469066	0.00752754	0.120073
Ciclev10001380m.g	AT3G18710.1	plant U-box 29	scaffold_5:38491114-38492945	118.074	128.483	0.918985	0.75051	1
Ciclev10001382m.g	AT1G77120.1	alcohol dehydrogenase 1	scaffold_5:38339052-38344772	40.4276	101.334	0.398954	1.09e-05	0.00038738
Ciclev10001383m.g	AT5G27450.1	mevalonate kinase	scaffold_5:32759552-32763763	8.25267	7.61255	1.08409	0.635779	1
Ciclev10001384m.g	AT1G45000.1	AAA-type ATPase family protein	scaffold_5:41352237-41355326	68.7689	85.1365	0.807749	0.57405	1
Ciclev10001386m.g	AT5G42970.1	Proteasome component (PCI) domain protein	scaffold_5:40912317-40916781	22.516	21.6987	1.03767	0.654617	1
Ciclev10001388m.g	AT4G24220.1	NAD(P)-binding Rossmann-fold superfamily protein	scaffold_5:30956192-30957967	2.99331	2.76523	1.08248	1	1
Ciclev10001389m.g	AT1G33060.2	NAC 014	scaffold_5:40818937-40822881	62.7191	68.6945	0.913015	0.861836	1
Ciclev10001390m.g	AT1G54520.1		scaffold_5:30572950-30577888	23.1332	17.7376	1.30419	0.216266	1
Ciclev10001393m.g	AT4G24220.1	NAD(P)-binding Rossmann-fold superfamily protein	scaffold_5:30931924-30933298	6.17981	7.36056	0.839584	1	1
Ciclev10001394m.g	AT1G57680.1		scaffold_5:2465538-2469155	76.666	212.794	0.360283	1.87e-12	1.83e-10
Ciclev10001396m.g	AT1G80950.1	Phospholipid/glycerol acyltransferase family protein	scaffold_5:40850791-40856282	9.71319	7.96411	1.21962	0.487697	1
Ciclev10001397m.g	AT1G27600.1	Nucleotide-diphospho-sugar transferases superfamily protein	scaffold_5:35089436-35093078	10.5434	21.8387	0.482785	0.161947	1
Ciclev10001398m.g	AT2G18950.1	homogentisate phytyltransferase 1	scaffold_5:9330187-9333235	1119.19	1462.52	0.765248	0.000352948	0.00901815
Ciclev10001399m.g	AT1G22440.1	Zinc-binding alcohol dehydrogenase family protein	scaffold_5:36112286-36116407	106.759	71.353	1.49621	0.000552354	0.0132973
Ciclev10001400m.g	AT5G42520.1	basic pentacysteine 6	scaffold_5:41657488-41660413	19.4277	14.4331	1.34605	0.239336	1
Ciclev10001401m.g	AT2G02450.2	NAC domain containing protein 35	scaffold_5:354415-357611	4.06847	4.44247	0.915813	1	1
Ciclev10001403m.g	AT1G76420.1	NAC (No Apical Meristem) domain transcriptional regulator superfamily protein	scaffold_5:42943641-42945230	1.04806	0.539389	1.94305	0.60305	1
Ciclev10001405m.g	AT5G13930.1	Chalcone and stilbene synthase family protein	scaffold_5:37169956-37171699	34.017	25.4276	1.3378	0.123047	0.864423
Ciclev10001406m.g	AT1G49780.1	plant U-box 26	scaffold_5:17543856-17545059	1.14867	0.744156	1.54359	0.60305	1
Ciclev10001407m.g	AT1G36310.1	S-adenosyl-L-methionine-dependent methyltransferases superfamily protein	scaffold_5:36777391-36780420	10.4527	12.3449	0.846722	1	1
Ciclev10001408m.g	AT1G77860.1	Rhomboid-related intramembrane serine protease family protein	scaffold_5:36833742-36837131	1e-05	0.369509	2.71e-05	1	1
Ciclev10001409m.g	AT1G19600.1	pfkB-like carbohydrate kinase family protein	scaffold_5:41173950-41177458	12.0942	16.3386	0.740223	0.719079	1
Ciclev10001411m.g	AT1G59520.1	CW7	scaffold_5:35702667-35709316	10.8112	10.6863	1.01169	0.832611	1
Ciclev10001412m.g	AT4G24220.1	NAD(P)-binding Rossmann-fold superfamily protein	scaffold_5:23972062-23973828	2.44836	1.12847	2.16963	0.670509	1
Ciclev10001414m.g	AT4G24220.1	NAD(P)-binding Rossmann-fold superfamily protein	scaffold_5:23484138-23485588	0.839535	0.0606688	13.838	1	1
Ciclev10001415m.g	AT3G02630.1	Plant stearoyl-acyl-carrier-protein desaturase family protein	scaffold_5:34289885-34293193	5.08856	6.15683	0.82649	1	1
Ciclev10001416m.g	AT4G34160.1	CYCLIN D3;1	scaffold_5:39875927-39877965	0.805481	0.950288	0.847618	1	1
Ciclev10001417m.g	AT4G08940.1	Ubiquitin carboxyl-terminal hydrolase family protein	scaffold_5:36324041-36326387	2.24847	2.81624	0.798394	1	1
Ciclev10001418m.g	AT3G04970.1	DHHC-type zinc finger family protein	scaffold_5:32320181-32324171	15.6554	21.0201	0.744782	0.627281	1
Ciclev10001419m.g	AT1G10280.1	Core-2/I-branching beta-1,6-N-acetylglucosaminyltransferase family protein	scaffold_5:2069219-2072819	6.12161	2.95181	2.07385	0.205666	1
Ciclev10001420m.g	AT4G24220.1	NAD(P)-binding Rossmann-fold superfamily protein	scaffold_5:23886542-23889813	2.572	1.85688	1.38512	0.670509	1
Ciclev10001421m.g			scaffold_5:13886632-13892195	2.91252	3.61128	0.806506	1	1
Ciclev10001422m.g	AT4G24220.2	NAD(P)-binding Rossmann-fold superfamily protein	scaffold_5:23986984-23992055	2.02953	1.15877	1.75145	0.670509	1
Ciclev10001423m.g			scaffold_5:36058140-36063798	10.3104	15.3081	0.673526	0.567762	1
Ciclev10001424m.g	AT1G31500.1	DNAse I-like superfamily protein	scaffold_5:29033626-29037975	6.78342	7.11064	0.953982	1	1
Ciclev10001426m.g	AT4G19420.1	Pectinacetylesterase family protein	scaffold_5:29072428-29075604	50.4836	94.0225	0.536931	0.00464011	0.081086
Ciclev10001427m.g	AT3G54360.1	zinc ion binding	scaffold_5:23710056-23715863	138.421	151.288	0.91495	0.769216	1
Ciclev10001428m.g	AT4G24320.1	Ubiquitin carboxyl-terminal hydrolase family protein	scaffold_5:5993469-5995467	4.72528	4.45853	1.05983	1	1
Ciclev10001429m.g	AT1G10070.1	branched-chain amino acid transaminase 2	scaffold_5:34891099-34894176	256.558	465.436	0.551221	8.38e-10	5.88e-08
Ciclev10001432m.g	AT4G36090.3	oxidoreductase, 2OG-Fe(II) oxygenase family protein	scaffold_5:9941408-9943881	4.37945	3.15401	1.38853	0.742562	1
Ciclev10001434m.g	AT1G47710.1	Serine protease inhibitor (SERPIN) family protein	scaffold_5:40508146-40511842	39.8688	46.8713	0.850602	0.914663	1
Ciclev10001435m.g	AT3G26430.1	GDSL-like Lipase/Acylhydrolase superfamily protein	scaffold_5:37388292-37391250	13.9494	15.6224	0.89291	1	1
Ciclev10001436m.g	AT1G18740.1	Protein of unknown function (DUF793)	scaffold_5:19117554-19119789	13.8908	13.226	1.05026	0.850339	1
Ciclev10001437m.g	AT5G42130.1	Mitochondrial substrate carrier family protein	scaffold_5:38489256-38490776	16.0858	11.7823	1.36525	0.26412	1
Ciclev10001438m.g	AT1G75500.1	Walls Are Thin 1	scaffold_5:41479362-41481770	2.28156	0.76145	2.99634	0.346714	1
Ciclev10001440m.g	AT1G18740.1	Protein of unknown function (DUF793)	scaffold_5:38719566-38721176	106.896	46.6773	2.29011	1.59e-08	9.5e-07
Ciclev10001445m.g	AT4G24220.1	NAD(P)-binding Rossmann-fold superfamily protein	scaffold_5:34453873-34455426	1.51538	0.988036	1.53373	0.60305	1
Ciclev10001446m.g	AT1G22440.1	Zinc-binding alcohol dehydrogenase family protein	scaffold_5:36155361-36158452	8.92906	8.79212	1.01558	0.817333	1
Ciclev10001449m.g	AT5G07900.1	Mitochondrial transcription termination factor family protein	scaffold_5:36510764-36512399	3.11003	4.46243	0.696936	1	1
Ciclev10001450m.g	AT1G20925.1	Auxin efflux carrier family protein	scaffold_5:17058859-17070837	0.309779	0.248274	1.24773	1	1
Ciclev10001451m.g	AT1G60060.1	Serine/threonine-protein kinase WNK (With No Lysine)-related	scaffold_5:39905513-39907734	3.27524	9.46284	0.346116	0.19153	1
Ciclev10001453m.g	AT1G61580.1	R-protein L3 B	scaffold_5:5103989-5106917	42.0118	55.2334	0.760623	0.546042	1
Ciclev10001454m.g	AT1G61580.1	R-protein L3 B	scaffold_5:38852546-38855263	101.726	114.972	0.884789	1	1
Ciclev10001456m.g	AT3G02630.1	Plant stearoyl-acyl-carrier-protein desaturase family protein	scaffold_5:19762224-19764906	0.0801742	0.129188	0.620601	1	1
Ciclev10001457m.g	AT5G42250.1	Zinc-binding alcohol dehydrogenase family protein	scaffold_5:42474627-42478305	173.194	160.205	1.08108	0.0706363	0.623587
Ciclev10001458m.g	AT2G35500.1	shikimate kinase like 2	scaffold_5:27012428-27017627	11.7482	13.0257	0.901925	1	1
Ciclev10001459m.g	AT3G02630.1	Plant stearoyl-acyl-carrier-protein desaturase family protein	scaffold_5:34284004-34286922	0.247106	0.159575	1.54853	1	1
Ciclev10001460m.g	AT4G08300.1	nodulin MtN21 /EamA-like transporter family protein	scaffold_5:37254881-37257398	1.39226	1.11636	1.24714	1	1
Ciclev10001461m.g	AT1G31350.1	KAR-UP F-box 1	scaffold_5:27819067-27820508	1.28485	2.73259	0.470195	1	1
Ciclev10001463m.g	AT5G63980.1	Inositol monophosphatase family protein	scaffold_5:17168718-17173839	51.4707	53.2671	0.966276	0.697364	1
Ciclev10001464m.g	AT1G33520.1	D111/G-patch domain-containing protein	scaffold_5:27602513-27607801	4.20287	6.45336	0.651268	0.779684	1
Ciclev10001467m.g	AT4G19420.1	Pectinacetylesterase family protein	scaffold_5:29056983-29060046	10.023	17.1783	0.583469	0.358582	1
Ciclev10001468m.g	AT4G19006.1	Proteasome component (PCI) domain protein	scaffold_5:26175747-26181708	54.2634	62.7634	0.864571	1	1
Ciclev10001469m.g	AT2G30350.2	Excinuclease ABC, C subunit, N-terminal	scaffold_5:13187677-13190472	9.01731	8.71021	1.03526	0.651625	1
Ciclev10001476m.g	AT2G33700.1	Protein phosphatase 2C family protein	scaffold_5:42853522-42856666	16.0282	14.679	1.09191	0.485209	1
Ciclev10001478m.g	AT3G05200.1	RING/U-box superfamily protein	scaffold_5:32542379-32543973	135.129	49.508	2.72944	5.13e-13	5.2e-11
Ciclev10001479m.g	AT5G65670.2	indole-3-acetic acid inducible 9	scaffold_5:35159689-35164384	27.048	34.4794	0.784468	0.800914	1
Ciclev10001480m.g	AT5G27690.1	Heavy metal transport/detoxification superfamily protein	scaffold_5:33293771-33295895	1.79762	2.0492	0.87723	1	1
Ciclev10001481m.g	AT1G53710.1	Calcineurin-like metallo-phosphoesterase superfamily protein	scaffold_5:36028654-36031153	1.55853	1.15853	1.34527	1	1
Ciclev10001485m.g	AT1G21690.1	ATPase family associated with various cellular activities (AAA)	scaffold_5:37652360-37656378	6.88668	8.59039	0.801673	1	1
Ciclev10001487m.g	AT4G08960.1	phosphotyrosyl phosphatase activator (PTPA) family protein	scaffold_5:36215841-36219128	27.1053	26.415	1.02613	0.590121	1
Ciclev10001488m.g	AT4G37680.1	heptahelical protein 4	scaffold_5:34695462-34698892	14.3237	48.458	0.29559	0.000139774	0.0038914
Ciclev10001489m.g	AT2G40650.1	PRP38 family protein	scaffold_5:33805345-33808164	26.6327	47.3704	0.562222	0.0642748	0.588945
Ciclev10001491m.g	AT1G09800.1	Pseudouridine synthase family protein	scaffold_5:5317018-5321025	7.17674	5.52437	1.29911	0.594063	1
Ciclev10001493m.g	AT1G75020.1	lysophosphatidyl acyltransferase 4	scaffold_5:40745800-40749765	25.6752	37.436	0.685843	0.380783	1
Ciclev10001494m.g	AT1G09340.1	chloroplast RNA binding	scaffold_5:34251120-34255285	207.635	233.289	0.890033	0.96199	1
Ciclev10001495m.g	AT1G21790.1	TRAM, LAG1 and CLN8 (TLC) lipid-sensing domain containing protein	scaffold_5:37413098-37417182	1.71008	2.4489	0.698305	1	1
Ciclev10001496m.g	AT5G42470.1		scaffold_5:41948954-41952895	8.13516	6.32897	1.28538	0.465725	1
Ciclev10001500m.g	AT1G77120.1	alcohol dehydrogenase 1	scaffold_5:38320640-38322884	3.21654	12.6762	0.253746	0.0859265	0.701315
Ciclev10001502m.g	AT1G77120.1	alcohol dehydrogenase 1	scaffold_5:38314988-38317341	5.1948	25.14	0.206635	0.00121937	0.0265172
Ciclev10001505m.g	AT1G36050.2	Endoplasmic reticulum vesicle transporter protein	scaffold_5:36540903-36547227	56.7	88.6485	0.639605	0.0677371	0.610664
Ciclev10001506m.g	AT4G24500.2	hydroxyproline-rich glycoprotein family protein	scaffold_5:35521571-35526568	19.7456	22.2662	0.886797	1	1
Ciclev10001508m.g	AT4G08150.1	KNOTTED-like from Arabidopsis thaliana	scaffold_5:34910793-34916593	1e-05	0.084215	0.000118744	1	1
Ciclev10001509m.g	AT1G75330.1	ornithine carbamoyltransferase	scaffold_5:41190081-41192832	20.3907	18.4963	1.10242	0.527775	1
Ciclev10001511m.g	AT3G62630.1	Protein of unknown function (DUF1645)	scaffold_5:33916070-33917739	0.0647803	0.0523714	1.23694	1	1
Ciclev10001512m.g	AT1G34380.2	5\'-3\' exonuclease family protein	scaffold_5:39487474-39489870	10.4433	12.869	0.811508	1	1
Ciclev10001513m.g	AT1G35910.1	Haloacid dehalogenase-like hydrolase (HAD) superfamily protein	scaffold_5:36526072-36528589	4.58373	4.70297	0.974646	1	1
Ciclev10001514m.g			scaffold_5:29581918-29583598	1.67631	0.789	2.1246	0.60305	1
Ciclev10001515m.g	AT2G33560.1	BUB1-related (BUB1: budding uninhibited by benzymidazol 1)	scaffold_5:43079827-43083323	0.12791	0.463932	0.275709	1	1
Ciclev10001518m.g	AT5G09810.1	actin 7	scaffold_5:22691011-22694289	7.06873	7.12309	0.992368	0.808221	1
Ciclev10001522m.g	AT4G21390.1	S-locus lectin protein kinase family protein	scaffold_5:32208696-32211119	1.70504	1.18124	1.44343	1	1
Ciclev10001524m.g	AT5G28840.1	GDP-D-mannose 3\',5\'-epimerase	scaffold_5:29481816-29485113	56.3701	98.2578	0.573696	0.0101438	0.151785
Ciclev10001525m.g	AT1G20650.1	Protein kinase superfamily protein	scaffold_5:42764088-42767443	34.1665	98.599	0.34652	9.46e-07	4.26e-05
Ciclev10001527m.g	AT1G21410.1	F-box/RNI-like superfamily protein	scaffold_5:38120562-38123758	21.5833	25.0735	0.860801	1	1
Ciclev10001528m.g	AT1G58110.1	Basic-leucine zipper (bZIP) transcription factor family protein	scaffold_5:6726816-6730833	6.27698	8.37312	0.749658	1	1
Ciclev10001531m.g	AT1G10210.1	mitogen-activated protein kinase 1	scaffold_5:41316977-41320780	38.9698	35.0514	1.11179	0.418361	1
Ciclev10001533m.g	AT3G21175.2	ZIM-like 1	scaffold_5:35441222-35446874	34.4147	37.9738	0.906275	0.906828	1
Ciclev10001534m.g	AT4G06634.1	zinc finger (C2H2 type) family protein	scaffold_5:6599710-6604334	11.5161	8.33723	1.38129	0.386826	1
Ciclev10001538m.g	AT5G42440.1	Protein kinase superfamily protein	scaffold_5:38949629-38951212	29.9874	29.9913	0.99987	0.69838	1
Ciclev10001539m.g	AT1G75230.2	DNA glycosylase superfamily protein	scaffold_5:41093724-41097411	22.0528	24.9637	0.883395	0.88621	1
Ciclev10001543m.g	AT3G57710.1	Protein kinase superfamily protein	scaffold_5:33143268-33144676	0.262903	0.210599	1.24836	1	1
Ciclev10001544m.g	AT1G47230.1	CYCLIN A3;4	scaffold_5:34321003-34323724	0.0502139	0.24264	0.206948	1	1
Ciclev10001546m.g	AT1G28230.1	purine permease 1	scaffold_5:35932958-35935079	54.3827	21.4865	2.53102	1.69e-05	0.000588015
Ciclev10001550m.g			scaffold_5:14689217-14691267	33.0022	27.3458	1.20685	0.251914	1
Ciclev10001551m.g	AT1G60750.1	NAD(P)-linked oxidoreductase superfamily protein	scaffold_5:29653121-29655450	13.2124	13.7657	0.959806	0.850339	1
Ciclev10001552m.g	AT4G14960.2	Tubulin/FtsZ family protein	scaffold_5:35027721-35030201	5.00932	20.4321	0.245169	0.0113474	0.166485
Ciclev10001558m.g			scaffold_5:38710118-38714774	5.557	5.03962	1.10266	1	1
Ciclev10001559m.g	AT4G39090.1	Papain family cysteine protease	scaffold_5:41496791-41499173	480.456	374.204	1.28394	4.76e-08	2.61e-06
Ciclev10001561m.g	AT1G75900.1	GDSL-like Lipase/Acylhydrolase superfamily protein	scaffold_5:42162733-42165933	1.23385	0.783747	1.5743	0.60305	1
Ciclev10001562m.g	AT1G75220.1	Major facilitator superfamily protein	scaffold_5:41084274-41089200	51.825	36.5239	1.41893	0.0332605	0.372624
Ciclev10001563m.g	AT1G78080.1	related to AP2 4	scaffold_5:36550506-36552800	382.49	689.31	0.554888	1.64e-13	1.78e-11
Ciclev10001564m.g	AT2G23790.1	Protein of unknown function (DUF607)	scaffold_5:40780715-40782937	2.20046	1.84003	1.19588	0.670509	1
Ciclev10001565m.g	AT5G27930.1	Protein phosphatase 2C family protein	scaffold_5:33766086-33769182	29.1572	28.5938	1.0197	0.60237	1
Ciclev10001569m.g	AT5G13500.1		scaffold_5:21545136-21549523	14.7145	18.055	0.814982	0.863969	1
Ciclev10001571m.g	AT1G45110.1	Tetrapyrrole (Corrin/Porphyrin) Methylases	scaffold_5:41390245-41394394	8.15155	6.31936	1.28993	0.465725	1
Ciclev10001572m.g	AT1G43650.1	nodulin MtN21 /EamA-like transporter family protein	scaffold_5:38685604-38688349	3.12184	5.71198	0.546543	0.758707	1
Ciclev10001575m.g	AT4G09760.3	Protein kinase superfamily protein	scaffold_5:39105671-39108800	77.5463	208.542	0.37185	1.25e-11	1.1e-09
Ciclev10001576m.g	AT1G76920.1	F-box family protein	scaffold_5:38556651-38558181	11.6941	16.1784	0.722822	0.58244	1
Ciclev10001578m.g	AT1G75880.1	SGNH hydrolase-type esterase superfamily protein	scaffold_5:42170317-42173218	14.7645	12.4076	1.18996	0.571041	1
Ciclev10001580m.g	AT5G45310.1		scaffold_5:29180179-29184765	0.346799	0.230053	1.50747	1	1
Ciclev10001581m.g	AT5G65420.1	CYCLIN D4;1	scaffold_5:35791061-35793496	0.372549	0.237859	1.56626	1	1
Ciclev10001582m.g	AT5G04990.1	SAD1/UNC-84 domain protein 1	scaffold_5:24058278-24059509	6.90749	11.3912	0.606388	0.492231	1
Ciclev10001583m.g	AT2G25710.1	holocarboxylase synthase 1	scaffold_5:37060930-37065943	10.7833	11.6518	0.925462	1	1
Ciclev10001591m.g	AT1G06870.1	Peptidase S24/S26A/S26B/S26C family protein	scaffold_5:40526247-40529184	248.744	187.702	1.32521	2.35e-05	0.000788954
Ciclev10001595m.g	AT2G30280.1	RNA-directed DNA methylation 4	scaffold_5:12849307-12853770	7.90632	6.51172	1.21417	0.796981	1
Ciclev10001596m.g	AT1G02170.1	metacaspase 1	scaffold_5:27294273-27299090	9.18837	12.4671	0.737009	0.835976	1
Ciclev10001597m.g	AT1G77470.1	replication factor C subunit 3	scaffold_5:37565046-37569231	41.7925	40.8537	1.02298	0.51095	1
Ciclev10001599m.g	AT5G65860.1	ankyrin repeat family protein	scaffold_5:34474998-34478522	16.0785	17.5402	0.916666	0.86685	1
Ciclev10001600m.g	AT1G48460.1		scaffold_5:40628243-40630241	19.1733	19.5459	0.980937	0.752361	1
Ciclev10001601m.g	AT1G68140.1	Protein of unknown function (DUF1644)	scaffold_5:12246616-12250494	39.9981	53.0763	0.753596	0.410701	1
Ciclev10001602m.g	AT5G43190.1	Galactose oxidase/kelch repeat superfamily protein	scaffold_5:34641430-34642548	8.59981	11.9233	0.721261	0.828169	1
Ciclev10001604m.g			scaffold_5:30838247-30839761	180.655	269.829	0.669517	0.00458289	0.080301
Ciclev10001605m.g	AT4G09040.1	RNA-binding (RRM/RBD/RNP motifs) family protein	scaffold_5:36021217-36023150	65.9458	59.9864	1.09935	0.245752	1
Ciclev10001606m.g	AT5G64920.1	COP1-interacting protein 8	scaffold_5:42021422-42023134	21.815	41.9009	0.520633	0.0458885	0.467532
Ciclev10001611m.g	AT4G09670.1	Oxidoreductase family protein	scaffold_5:39241457-39245153	12.2632	7.63514	1.60615	0.192874	1
Ciclev10001613m.g	AT3G13960.1	growth-regulating factor 5	scaffold_5:24794458-24798226	2.41152	2.71479	0.88829	1	1
Ciclev10001614m.g	AT4G31940.1	cytochrome P450, family 82, subfamily C, polypeptide 4	scaffold_5:5919462-5922134	61.3659	47.5273	1.29117	0.0555487	0.533725
Ciclev10001615m.g	AT1G16130.1	wall associated kinase-like 2	scaffold_5:33079707-33082768	2.06415	2.29325	0.900098	1	1
Ciclev10001616m.g	AT3G62770.1	Transducin/WD40 repeat-like superfamily protein	scaffold_5:33249884-33251932	3.85887	3.83774	1.00551	1	1
Ciclev10001617m.g	AT1G20540.1	Transducin/WD40 repeat-like superfamily protein	scaffold_5:42589391-42594049	10.097	8.841	1.14207	0.507541	1
Ciclev10001618m.g	AT4G39330.1	cinnamyl alcohol dehydrogenase 9	scaffold_5:42228571-42230813	7.83349	7.27763	1.07638	0.808221	1
Ciclev10001620m.g	AT1G17020.1	senescence-related gene 1	scaffold_5:29233648-29235716	0.329349	1.68233	0.19577	1	1
Ciclev10001621m.g	AT2G45440.1	dihydrodipicolinate synthase	scaffold_5:34294852-34297359	25.8686	24.3499	1.06237	0.577139	1
Ciclev10001623m.g	AT1G17010.1	2-oxoglutarate (2OG) and Fe(II)-dependent oxygenase superfamily protein	scaffold_5:29269466-29271520	10.6535	7.62744	1.39673	0.365507	1
Ciclev10001624m.g	AT1G74320.1	Protein kinase superfamily protein	scaffold_5:20805064-20810906	14.444	25.5015	0.566398	0.21212	1
Ciclev10001625m.g	AT1G20330.1	sterol methyltransferase 2	scaffold_5:42297978-42300281	13.0582	9.15305	1.42665	0.308513	1
Ciclev10001626m.g	AT1G17020.1	senescence-related gene 1	scaffold_5:29339627-29341639	0.104943	0.257544	0.407476	1	1
Ciclev10001627m.g	AT5G08750.1	RING/FYVE/PHD zinc finger superfamily protein	scaffold_5:15689221-15694276	24.905	17.7118	1.40612	0.168714	1
Ciclev10001629m.g	AT4G24220.1	NAD(P)-binding Rossmann-fold superfamily protein	scaffold_5:23963706-23965204	2.11187	0.739339	2.85643	0.346714	1
Ciclev10001630m.g	AT1G22360.1	UDP-glucosyl transferase 85A2	scaffold_5:36280827-36282328	14.3462	23.9294	0.599522	0.337286	1
Ciclev10001634m.g	AT4G22720.1	Actin-like ATPase superfamily protein	scaffold_5:424432-427199	24.2203	13.5114	1.79258	0.0364474	0.399188
Ciclev10001635m.g	AT1G19980.1	cytomatrix protein-related	scaffold_5:41932894-41936414	2.28958	2.08184	1.09979	1	1
Ciclev10001636m.g	AT4G24240.1	WRKY DNA-binding protein 7	scaffold_5:39928704-39930585	25.3665	12.5164	2.02666	0.0155033	0.212784
Ciclev10001637m.g	AT1G56345.1	Pseudouridine synthase family protein	scaffold_5:33988528-33991585	5.33388	5.16482	1.03273	1	1
Ciclev10001638m.g	AT1G31880.1	DZC (Disease resistance/zinc finger/chromosome condensation-like region) domain containing protein	scaffold_5:24467954-24473569	0.241415	0.242211	0.996714	1	1
Ciclev10001639m.g	AT1G43860.1	sequence-specific DNA binding transcription factors	scaffold_5:38186494-38189379	14.2046	9.44136	1.50451	0.230042	1
Ciclev10001640m.g	AT1G27700.1	Syntaxin/t-SNARE family protein	scaffold_5:34472166-34474847	105.648	158.833	0.665151	0.0265957	0.321117
Ciclev10001644m.g	AT2G44270.1	repressor of lrx1	scaffold_5:42455993-42459424	13.9545	18.8396	0.7407	0.727871	1
Ciclev10001645m.g	AT5G45410.1		scaffold_5:24386172-24389558	25.5894	23.0145	1.11188	0.481873	1
Ciclev10001646m.g	AT1G78110.1		scaffold_5:36504700-36506386	1.50231	1.26767	1.1851	1	1
Ciclev10001647m.g	AT2G39970.1	Mitochondrial substrate carrier family protein	scaffold_5:43288730-43293234	56.8693	73.8159	0.770421	0.483951	1
Ciclev10001648m.g	AT1G17020.1	senescence-related gene 1	scaffold_5:29274444-29276842	29.6154	18.5682	1.59495	0.0459507	0.46768
Ciclev10001649m.g	AT1G32170.1	xyloglucan endotransglucosylase/hydrolase 30	scaffold_5:26615176-26617732	4.80925	2.74446	1.75235	0.486694	1
Ciclev10001653m.g	AT1G60690.1	NAD(P)-linked oxidoreductase superfamily protein	scaffold_5:29638559-29640390	0.0985743	1e-05	9857.43	1	1
Ciclev10001657m.g	AT1G21710.1	8-oxoguanine-DNA glycosylase 1	scaffold_5:37622886-37624944	40.4403	31.2322	1.29483	0.127217	0.887344
Ciclev10001658m.g	AT1G19300.1	Nucleotide-diphospho-sugar transferases superfamily protein	scaffold_5:40728916-40730477	3.44345	6.59028	0.522504	0.557629	1
Ciclev10001659m.g	AT3G05580.1	Calcineurin-like metallo-phosphoesterase superfamily protein	scaffold_5:33416340-33422684	42.0616	66.0391	0.63692	0.10521	0.784748
Ciclev10001660m.g	AT5G56750.1	N-MYC downregulated-like 1	scaffold_5:30531742-30535211	17.3932	93.0021	0.187019	1.28e-11	1.11e-09
Ciclev10001661m.g	AT5G54160.1	O-methyltransferase 1	scaffold_5:7157124-7159270	1e-05	0.0604526	0.000165419	1	1
Ciclev10001665m.g	AT1G20850.1	xylem cysteine peptidase 2	scaffold_5:42957413-42959269	0.102095	0.0818985	1.2466	1	1
[truncated: 18,523 more rows]

## Sheet: Canton lemon vs. ‘Shatangju’
All the differentially expressed unigenes and their FPKM values in Canton lemon vs.‘Shatangju’ mandarin
[truncated: 19,561 more rows]
